# Supplementary material for: Sugar Starvation Disrupts Lipid Breakdown by Inducing Autophagy in Embryonic Axes of Lupin (Lupinus spp.) Germinating Seeds
Source: MDPI journal article supplement (doi:10.3390/ijms241411773), 2023-07-21
Supplement: s1 [file s1]

**Table S5.** Primer sequences used for qRT-PCR reactions. Actin was used as endogenous control. Primers were designed on NGS-derived sequences mapped to the reference genome.

| Gene ID                | Forward primer (5'-3')    | Reverse primer (5'-3')   | Amplicon length (bp) |
|------------------------|---------------------------|--------------------------|----------------------|
| White lupin            |                           |                          |                      |
| XM_019572931.1         | gatgatggaaccttggaacttatg  | gccaaagcattcacttcatctg   | 122                  |
| XM_019559246.1         | ggggactggtgcgaagaggttcc   | caccacctcagcttcggcgac    | 121                  |
| XM_019588469.1         | ctatgtcacatttttaggtacc    | cttgagggtgttttgatgc      | 111                  |
| XM_019559290.1         | caccagagagggttaactttgatc  | cttgatgtgtgactttggg      | 122                  |
| XM_019562376.1         | gaacacagaatcaaggtccg      | gtgaagtctggacttccaaattc  | 119                  |
| XR_002105784.1         | caaagcgacttctcgtgttac     | gactcctgcatggcctccc      | 122                  |
| XM_019607520.1         | cagaagagaagcaaagaggag     | cctatcagaacagatgggtgg    | 121                  |
| XM_019570378.1         | cgcattagagagaagtatccag    | caaactgaccaacgtcaaatcag  | 124                  |
| XM_019585272.1 (actin) | ctcctgctatgtatgttgctatac  | gagagcataaccttcatagatagg | 128                  |
| Andean lupin           |                           |                          |                      |
| XM_019568374.1         | gccaccaaccgcaattttcaac    | cttccatcatcttttggattg    | 125                  |
| XM_019591458.1         | ggcaagggtatgctatagggattac | gtgacccggtggaaaagactcg   | 130                  |
| XM_019588469.1         | ctatgtcacatttttaggcacc    | cttgagggttttctggatgc     | 111                  |
| XR_002105261.1         | caccagagagggttaactttgatc  | cctggatgtgtgacttcggg     | 122                  |
| XR_002105784.1         | caaagcgacttctcgtgttac     | gactcctgcatgacctccc      | 122                  |
| XM_019562376.1         | gaacacagaatcaaggtccg      | gtgaagtctggacttccaaattc  | 119                  |
| XM_019570378.1         | ggcttccgcattcgagag        | caaactgaccaactgtcaaatccg | 131                  |
| XM_019608702.1         | ctagtatttgggtgcaccttc     | ggcatagttttcttcttactttgg | 165                  |
| XM_019585272.1 (actin) | ctccggctatgtatgttgcc      | gagagcataaccttcgtagatagg | 128                  |
