# Supplementary material for: Sugar Starvation Disrupts Lipid Breakdown by Inducing Autophagy in Embryonic Axes of Lupin (Lupinus spp.) Germinating Seeds
Source: MDPI journal article supplement (doi:10.3390/ijms241411773), 2023-07-21
Supplement: s1 [file s1]

**Table S6.** Summary of next-generation sequencing (NGS) quality.

| Sequencing 1         |                 |         |                        |                            |
|----------------------|-----------------|---------|------------------------|----------------------------|
| Library              | Number of reads | Q30 (%) | Number of mapped reads | Percentage of mapped reads |
| White lupin, +S      | 45 587 123      | 96.06   | 42 471 145             | 93.16                      |
| White lupin, +S+Asn  | 75 948 271      | 96.68   | 70 922 341             | 93.38                      |
| White lupin, –S      | 15 467 709      | 96.26   | 14 230 241             | 92.00                      |
| White lupin, –S+Asn  | 20 310 261      | 96.77   | 18 797 080             | 92.55                      |
| Andean lupin, +S     | 39 345 348      | 96.95   | 36 164 291             | 91.95                      |
| Andean lupin, +S+Asn | 65 753 503      | 96.66   | 60 522 222             | 92.04                      |
| Andean lupin, –S     | 34 578 149      | 97.17   | 31 275 002             | 90.45                      |
| Andean lupin, –S+Asn | 42 588 111      | 96.77   | 38 724 774             | 90.92                      |

  

| Sequencing 2         |                 |         |                        |                            |
|----------------------|-----------------|---------|------------------------|----------------------------|
| Library              | Number of reads | Q30 (%) | Number of mapped reads | Percentage of mapped reads |
| White lupin, +S      | 46 031 705      | 94.54   | 43 180 370             | 94.44                      |
| White lupin, +S+Asn  | 39 473 364      | 94.67   | 37 252 632             | 94.55                      |
| White lupin, –S      | 44 164 948      | 94.73   | 41 437 811             | 94.01                      |
| White lupin, –S+Asn  | 35 916 260      | 94.85   | 34 092 432             | 94.95                      |
| Andean lupin, +S     | 43 696 551      | 94.70   | 40 804 505             | 93.59                      |
| Andean lupin, +S+Asn | 44 140 263      | 94.52   | 41 699 581             | 94.57                      |
| Andean lupin, –S     | 44 834 214      | 94.95   | 41 865 586             | 93.44                      |
| Andean lupin, –S+Asn | 46 946 551      | 94.78   | 43 476 282             | 92.71                      |

  

| Sequencing 3         |                 |         |                        |                            |
|----------------------|-----------------|---------|------------------------|----------------------------|
| Library              | Number of reads | Q30 (%) | Number of mapped reads | Percentage of mapped reads |
| White lupin, +S      | 72 881 182      | 93.92   | 68 751 715             | 94.35                      |
| White lupin, +S+Asn  | 69 088 233      | 93.49   | 65 420 544             | 94.70                      |
| White lupin, –S      | 62 811 687      | 93.67   | 58 951 293             | 93.88                      |
| White lupin, –S+Asn  | 71 554 132      | 93.91   | 67 052 522             | 93.73                      |
| Andean lupin, +S     | 65 278 260      | 93.57   | 61 087 355             | 93.00                      |
| Andean lupin, +S+Asn | 68 275 501      | 93.81   | 64 287 264             | 94.20                      |
| Andean lupin, –S     | 66 363 521      | 93.77   | 62 707 272             | 94.50                      |
| Andean lupin, –S+Asn | 61 970 297      | 93.50   | 57 762 638             | 93.27                      |

Q30 (%), reads quality according to the percentage of bases having a base quality value greater or equal to 30, i.e. less than 1 error in 1000 bases.

+S, embryonic axes cultured 96 h *in vitro* on medium with 60 mM sucrose

–S, embryonic axes cultured 96 h *in vitro* on medium without sucrose

+Asn, embryonic axes cultured 96 h *in vitro* on +S or –S media enriched with 35 mM asparagine
