# Supplementary material for: Sugar Starvation Disrupts Lipid Breakdown by Inducing Autophagy in Embryonic Axes of Lupin (Lupinus spp.) Germinating Seeds
Source: Int J Mol Sci. 2023 Jul 21;24(14):11773. doi: 10.3390/ijms241411773 (PMC10380618; doi:10.3390/ijms241411773)
Supplement: Supplementary file 1 [file ijms-24-11773-s001.zip]

Archive with 7 entries (7 files):
- Figure S1.pdf
- Table S1.xlsx
- Table S2.xlsx
- Table S3.xlsx
- Table S4.xlsx
- Table S5.pdf
- Table S6.pdf
