# Supplementary material for: Sugar Starvation Disrupts Lipid Breakdown by Inducing Autophagy in Embryonic Axes of Lupin (Lupinus spp.) Germinating Seeds
Source: Int J Mol Sci. 2023 Jul 21;24(14):11773. doi: 10.3390/ijms241411773 (PMC10380618; doi:10.3390/ijms241411773)
Supplement: Supplementary file 1 [file ijms-24-11773-s001.zip › Table S1.xlsx]

## Sheet: (A) White lupin, +S ̸ +S+Asn
Table S1. Full proteomics data (iTRAQ) for embryonic axes isolated from white lupin (A) and Andean lupin (B) germinating seeds and cultured in vitro for 96 h on a medium with (+S) and without (-S) 60 mM sucrose. Culture media were also enriched with 35 mM asparagine (+Asn). Sheets show relations in protein levels between embryonic axes in the following pairs: +S/+S+Asn, +S/-S, and -S/-S+Asn. Stat…
protein	q-value	ratio A/B	fold change	peptides	description
XP_019443521.1	0.00043	1.17	1.17	7	PREDICTED: seed linoleate 9S-lipoxygenase-3-like [Lupinus angustifolius]
XP_019445788.1	0.00043	1.11	1.11	13	PREDICTED: ferredoxin--nitrite reductase, chloroplastic-like [Lupinus angustifolius]
XP_019427881.1	0.00043	0.89	1.12	11	PREDICTED: cystathionine gamma-synthase 1, chloroplastic [Lupinus angustifolius]
XP_019430876.1	0.00043	0.87	1.15	15	PREDICTED: annexin D1-like [Lupinus angustifolius]
AQV09651.1+YP_009127508.1+P92406.1	0.00043	1.13	1.13	30	ribulose-1,5-bisphosphate carboxylase/oxygenase large subunit (chloroplast) [Lupinus atlanticus] ribulose 1,5-bisphosphate carboxylase/oxygenase large subunit (chloroplast) [Lupinus albus] RecName: Full=Ribulose bisphosphate carboxylase large chain; Short=RuBisCO large subunit
XP_019437027.1	0.00043	0.76	1.31	9	PREDICTED: seed biotin-containing protein SBP65-like [Lupinus angustifolius]
XP_019438028.1+OIW14823.1+XP_019458145.1	0.00043	1.19	1.19	19	PREDICTED: beta-galactosidase 3-like [Lupinus angustifolius] hypothetical protein TanjilG_17048 [Lupinus angustifolius] PREDICTED: beta-galactosidase 5-like [Lupinus angustifolius]
XP_019446808.1	0.00043	1.29	1.29	9	PREDICTED: cysteine proteinase COT44-like [Lupinus angustifolius]
XP_019451151.1	0.00193	0.90	1.11	26	PREDICTED: poly [ADP-ribose] polymerase 3 [Lupinus angustifolius]
XP_019417317.1	0.00347	1.24	1.24	5	PREDICTED: 1-aminocyclopropane-1-carboxylate oxidase 5-like [Lupinus angustifolius]
XP_019429896.1+OIW19836.1	0.00505	1.11	1.11	18	PREDICTED: monodehydroascorbate reductase 5, mitochondrial [Lupinus angustifolius] hypothetical protein TanjilG_24549 [Lupinus angustifolius]
OIV93303.1+XP_019423412.1	0.01069	1.10	1.10	11	hypothetical protein TanjilG_13130 [Lupinus angustifolius] PREDICTED: methylcrotonoyl-CoA carboxylase beta chain, mitochondrial isoform X1 [Lupinus angustifolius]
OIW04373.1+XP_019456251.1	0.01100	0.75	1.34	3	hypothetical protein TanjilG_32565 [Lupinus angustifolius] PREDICTED: asparagine synthetase [glutamine-hydrolyzing] 1-like isoform X1 [Lupinus angustifolius]
XP_019431337.1	0.01613	1.40	1.40	3	PREDICTED: fasciclin-like arabinogalactan protein 13 [Lupinus angustifolius]
XP_019442740.1	0.02084	0.56	1.80	2	PREDICTED: UDP-glycosyltransferase 83A1-like [Lupinus angustifolius]
XP_019419781.1	0.02562	0.92	1.09	6	PREDICTED: 60S ribosomal protein L30 [Lupinus angustifolius]
XP_019418906.1	0.02575	1.24	1.24	4	PREDICTED: polyphenol oxidase, chloroplastic-like [Lupinus angustifolius]
XP_019449066.1+XP_019449065.1+XP_019449063.1+XP_019449061.1+XP_019449064.1+XP_019449062.1	0.02688	0.79	1.26	6	PREDICTED: seed biotin-containing protein SBP65-like isoform X6 [Lupinus angustifolius] PREDICTED: seed biotin-containing protein SBP65-like isoform X5 [Lupinus angustifolius] PREDICTED: seed biotin-containing protein SBP65-like isoform X3 [Lupinus angustifolius] PREDICTED: seed biotin-containing protein SBP65-like isoform X1 [Lupinus angustifolius] PREDICTED: seed biotin-containing protein SBP65…
XP_019426113.1+XP_019431347.1+XP_019445672.1	0.02760	0.87	1.14	12	PREDICTED: 40S ribosomal protein S6-1 [Lupinus angustifolius] PREDICTED: 40S ribosomal protein S6-1-like [Lupinus angustifolius] PREDICTED: 40S ribosomal protein S6-1-like [Lupinus angustifolius]
XP_019421053.1+OIV95015.1	0.02762	0.89	1.12	7	PREDICTED: pectinesterase-like [Lupinus angustifolius] hypothetical protein TanjilG_22212 [Lupinus angustifolius]
XP_019423645.1	0.02796	0.89	1.12	6	PREDICTED: thioredoxin H-type-like [Lupinus angustifolius]
XP_019434165.1	0.03269	0.84	1.18	5	PREDICTED: annexin-like protein RJ4 [Lupinus angustifolius]
XP_019416641.1	0.04294	1.07	1.07	29	PREDICTED: uncharacterized protein LOC109327919 isoform X1 [Lupinus angustifolius]
XP_019436544.1	0.06873	0.89	1.12	9	PREDICTED: fructokinase-2-like [Lupinus angustifolius]
XP_019429051.1	0.06919	1.25	1.25	3	PREDICTED: legumin J-like [Lupinus angustifolius]
XP_019419773.1	0.06969	1.27	1.27	3	PREDICTED: polygalacturonase inhibitor-like [Lupinus angustifolius]
XP_019432361.1	0.07085	0.68	1.48	2	PREDICTED: uncharacterized protein LOC109339386 [Lupinus angustifolius]
XP_019441757.1	0.07108	1.23	1.23	3	PREDICTED: serine carboxypeptidase II-2-like [Lupinus angustifolius]
XP_019447537.1+OIW09274.1	0.07123	1.22	1.22	7	PREDICTED: uncharacterized protein LOC109350724 [Lupinus angustifolius] hypothetical protein TanjilG_01245 [Lupinus angustifolius]
XP_019423848.1	0.07136	0.84	1.19	3	PREDICTED: probable mannitol dehydrogenase [Lupinus angustifolius]
XP_019453198.1	0.08093	0.92	1.08	24	PREDICTED: heat shock protein 83 isoform X2 [Lupinus angustifolius]
XP_019448954.1	0.08395	1.06	1.06	8	PREDICTED: uncharacterized oxidoreductase At1g06690, chloroplastic [Lupinus angustifolius]
XP_019429821.1+XP_019429820.1+XP_019429822.1	0.08471	0.87	1.14	4	PREDICTED: polyadenylate-binding protein 2-like isoform X2 [Lupinus angustifolius] PREDICTED: polyadenylate-binding protein 2-like isoform X1 [Lupinus angustifolius] PREDICTED: polyadenylate-binding protein 2-like isoform X3 [Lupinus angustifolius]
OIW19478.1+XP_019441684.1+XP_019441669.1+XP_019441676.1	0.08473	0.87	1.15	4	hypothetical protein TanjilG_09498 [Lupinus angustifolius] PREDICTED: eukaryotic translation initiation factor-like isoform X3 [Lupinus angustifolius] PREDICTED: eukaryotic translation initiation factor-like isoform X1 [Lupinus angustifolius] PREDICTED: eukaryotic translation initiation factor-like isoform X2 [Lupinus angustifolius]
XP_019416317.1	0.08473	0.82	1.21	6	PREDICTED: 17.9 kDa class II heat shock protein-like [Lupinus angustifolius]
XP_019463244.1	0.08531	0.83	1.20	3	PREDICTED: 1-Cys peroxiredoxin [Lupinus angustifolius]
OIV97022.1+XP_019417293.1+XP_019417296.1+XP_019417295.1	0.08745	1.31	1.31	2	hypothetical protein TanjilG_19569 [Lupinus angustifolius] PREDICTED: patellin-3-like isoform X1 [Lupinus angustifolius] PREDICTED: patellin-3-like isoform X3 [Lupinus angustifolius] PREDICTED: patellin-3-like isoform X2 [Lupinus angustifolius]
XP_019437835.1	0.08984	0.82	1.21	5	PREDICTED: 17.1 kDa class II heat shock protein-like [Lupinus angustifolius]
XP_019417242.1	0.09472	0.83	1.20	2	PREDICTED: eukaryotic translation initiation factor-like [Lupinus angustifolius]
XP_019442531.1	0.09585	0.75	1.33	2	PREDICTED: P24 oleosin-like [Lupinus angustifolius]
XP_019465180.1	0.09624	0.90	1.11	7	PREDICTED: binding partner of ACD11 1-like [Lupinus angustifolius]
XP_019444312.1+OIW11302.1	0.09858	1.17	1.17	4	PREDICTED: ABC transporter B family member 1-like [Lupinus angustifolius] hypothetical protein TanjilG_20451 [Lupinus angustifolius]
XP_019419745.1+OIV89357.1+XP_019434799.1+XP_019439525.1	0.09950	0.94	1.06	31	PREDICTED: UTP--glucose-1-phosphate uridylyltransferase-like [Lupinus angustifolius] hypothetical protein TanjilG_22692 [Lupinus angustifolius] PREDICTED: UTP--glucose-1-phosphate uridylyltransferase [Lupinus angustifolius] PREDICTED: UTP--glucose-1-phosphate uridylyltransferase-like [Lupinus angustifolius]
XP_019444265.1	0.09957	1.06	1.06	16	PREDICTED: monodehydroascorbate reductase, seedling isozyme-like [Lupinus angustifolius]
XP_019461482.1	0.10128	0.72	1.39	3	PREDICTED: T-complex protein 1 subunit beta-like [Lupinus angustifolius]
XP_019425785.1	0.10794	1.16	1.16	2	PREDICTED: beta-D-xylosidase 1-like [Lupinus angustifolius]
XP_019449887.1+XP_019433128.1	0.10890	0.93	1.07	13	PREDICTED: ruvB-like 2 [Lupinus angustifolius] PREDICTED: ruvB-like 2 [Lupinus angustifolius]
XP_019452291.1	0.10902	1.10	1.10	3	PREDICTED: aspartic proteinase-like [Lupinus angustifolius]
XP_019452721.1	0.10963	0.88	1.14	3	PREDICTED: ATP synthase subunit d, mitochondrial [Lupinus angustifolius]
XP_019442188.1	0.11066	0.82	1.22	5	PREDICTED: late embryogenesis abundant protein D-34-like [Lupinus angustifolius]
XP_019414046.1	0.11075	1.40	1.40	2	PREDICTED: aquaporin PIP2-7-like [Lupinus angustifolius]
OIW07101.1+XP_019452264.1	0.11084	1.11	1.11	8	hypothetical protein TanjilG_02735 [Lupinus angustifolius] PREDICTED: topless-related protein 3-like [Lupinus angustifolius]
XP_019427589.1	0.11250	1.29	1.29	2	PREDICTED: xyloglucan endotransglucosylase/hydrolase protein A [Lupinus angustifolius]
XP_019413062.1	0.11491	0.71	1.41	2	PREDICTED: fructokinase-2-like [Lupinus angustifolius]
XP_019422032.1	0.11590	0.98	1.02	7	PREDICTED: probable inactive purple acid phosphatase 1 [Lupinus angustifolius]
XP_019463210.1+XP_019463213.1+XP_019463211.1+OIV99843.1	0.12592	0.83	1.20	4	PREDICTED: eukaryotic translation initiation factor-like isoform X1 [Lupinus angustifolius] PREDICTED: eukaryotic translation initiation factor-like isoform X3 [Lupinus angustifolius] PREDICTED: eukaryotic translation initiation factor-like isoform X2 [Lupinus angustifolius] hypothetical protein TanjilG_26181 [Lupinus angustifolius]
XP_019434459.1	0.12621	0.90	1.12	4	PREDICTED: T-complex protein 1 subunit epsilon-like isoform X1 [Lupinus angustifolius]
XP_019456769.1	0.12621	1.26	1.26	4	PREDICTED: uncharacterized acetyltransferase At3g50280-like [Lupinus angustifolius]
XP_019446892.1	0.12866	0.82	1.22	2	PREDICTED: proteasome subunit alpha type-7 [Lupinus angustifolius]
XP_019445329.1	0.12894	0.82	1.22	3	PREDICTED: phosphoenolpyruvate carboxykinase [ATP]-like [Lupinus angustifolius]
XP_019439359.1	0.13011	0.92	1.08	4	PREDICTED: lysine--tRNA ligase-like [Lupinus angustifolius]
XP_019445076.1	0.13011	0.93	1.08	8	PREDICTED: hsp70-Hsp90 organizing protein 1-like [Lupinus angustifolius]
XP_019446214.1	0.13163	1.17	1.17	5	PREDICTED: nuclear pore complex protein NUP155-like [Lupinus angustifolius]
OIV94443.1+XP_019421260.1	0.13574	0.91	1.10	4	hypothetical protein TanjilG_25505 [Lupinus angustifolius] PREDICTED: binding partner of ACD11 1-like [Lupinus angustifolius]
XP_019426491.1	0.13590	0.89	1.13	2	PREDICTED: translationally-controlled tumor protein homolog [Lupinus angustifolius]
XP_019443274.1	0.13713	0.92	1.09	8	PREDICTED: T-complex protein 1 subunit delta [Lupinus angustifolius]
XP_019447919.1	0.13893	1.12	1.12	9	PREDICTED: phototropin-1 [Lupinus angustifolius]
XP_019417921.1	0.14518	0.90	1.11	3	PREDICTED: phosphoenolpyruvate carboxykinase [ATP] 1-like [Lupinus angustifolius]
XP_019439049.1	0.14716	1.11	1.11	6	PREDICTED: serine/threonine-protein kinase 16 [Lupinus angustifolius]
XP_019425883.1	0.14802	0.88	1.13	3	PREDICTED: probable bifunctional methylthioribulose-1-phosphate dehydratase/enolase-phosphatase E1 isoform X1 [Lupinus angustifolius]
OIW11711.1+XP_019443676.1	0.14802	1.10	1.10	7	hypothetical protein TanjilG_12230 [Lupinus angustifolius] PREDICTED: nuclear-pore anchor-like isoform X1 [Lupinus angustifolius]
OIV94185.1+XP_019421912.1+XP_019446126.1	0.14802	0.75	1.33	2	hypothetical protein TanjilG_13802 [Lupinus angustifolius] PREDICTED: phosphoethanolamine N-methyltransferase 1-like [Lupinus angustifolius] PREDICTED: phosphomethylethanolamine N-methyltransferase-like [Lupinus angustifolius]
XP_019463902.1+OIW00611.1	0.14904	0.91	1.10	5	PREDICTED: glutamate-rich WD repeat-containing protein 1 [Lupinus angustifolius] hypothetical protein TanjilG_21826 [Lupinus angustifolius]
OIW00070.1+XP_019464366.1	0.14937	1.18	1.18	3	hypothetical protein TanjilG_26407 [Lupinus angustifolius] PREDICTED: L-ascorbate oxidase homolog [Lupinus angustifolius]
XP_019456399.1+OIW00858.1+XP_019464787.1+OIW02733.1+XP_019433775.1	0.14990	1.14	1.14	18	PREDICTED: 40S ribosomal protein S4-1-like [Lupinus angustifolius] hypothetical protein TanjilG_12799 [Lupinus angustifolius] PREDICTED: 40S ribosomal protein S4-1 [Lupinus angustifolius] hypothetical protein TanjilG_29509 [Lupinus angustifolius] PREDICTED: 40S ribosomal protein S4-1-like [Lupinus angustifolius]
OIW06851.1+XP_019452534.1	0.15142	1.09	1.09	2	hypothetical protein TanjilG_18233 [Lupinus angustifolius] PREDICTED: PTI1-like tyrosine-protein kinase 1 isoform X2 [Lupinus angustifolius]
OIW20451.1+XP_019431087.1	0.15183	0.89	1.13	3	hypothetical protein TanjilG_11761 [Lupinus angustifolius] PREDICTED: universal stress protein PHOS32-like [Lupinus angustifolius]
XP_019430445.1	0.15194	1.19	1.19	3	PREDICTED: 7-deoxyloganetin glucosyltransferase-like [Lupinus angustifolius]
XP_019463962.1	0.15239	0.92	1.08	11	PREDICTED: oil body-associated protein 2A-like [Lupinus angustifolius]
XP_019458410.1	0.15286	1.05	1.05	6	PREDICTED: uncharacterized protein LOC109358565 [Lupinus angustifolius]
XP_019436234.1	0.15475	0.93	1.08	7	PREDICTED: glutelin type-B 5-like [Lupinus angustifolius]
XP_019420015.1	0.15533	0.88	1.14	3	PREDICTED: U3 snoRNP-associated protein-like EMB2271 [Lupinus angustifolius]
XP_019447447.1	0.15670	1.34	1.34	2	PREDICTED: uridine kinase-like protein 1, chloroplastic [Lupinus angustifolius]
OIW09798.1+XP_019446688.1+XP_019446689.1	0.15695	1.11	1.11	4	hypothetical protein TanjilG_32236 [Lupinus angustifolius] PREDICTED: acid beta-fructofuranosidase-like isoform X1 [Lupinus angustifolius] PREDICTED: acid beta-fructofuranosidase-like isoform X2 [Lupinus angustifolius]
XP_019438716.1	0.15874	0.80	1.25	2	PREDICTED: P24 oleosin-like [Lupinus angustifolius]
XP_019452372.1+XP_019452373.1	0.15923	1.18	1.18	2	PREDICTED: probable polygalacturonase isoform X1 [Lupinus angustifolius] PREDICTED: probable polygalacturonase isoform X2 [Lupinus angustifolius]
XP_019435115.1	0.15973	0.90	1.11	3	PREDICTED: 4-hydroxyphenylpyruvate dioxygenase [Lupinus angustifolius]
XP_019437800.1	0.16024	1.06	1.06	9	PREDICTED: DNA-directed RNA polymerases IV and V subunit 2-like [Lupinus angustifolius]
XP_019421587.1+OIV94287.1	0.16077	0.83	1.20	2	PREDICTED: protein phosphatase 1 regulatory subunit pprA-like [Lupinus angustifolius] hypothetical protein TanjilG_00036 [Lupinus angustifolius]
XP_019452278.1	0.16077	1.18	1.18	2	PREDICTED: ribulose bisphosphate carboxylase small chain, chloroplastic-like [Lupinus angustifolius]
XP_019428532.1+XP_019428535.1+XP_019442655.1+XP_019442659.1+XP_019442658.1+XP_019442656.1	0.16185	0.97	1.03	24	PREDICTED: ubiquitin carboxyl-terminal hydrolase 14-like isoform X1 [Lupinus angustifolius] PREDICTED: ubiquitin carboxyl-terminal hydrolase 14-like isoform X3 [Lupinus angustifolius] PREDICTED: ubiquitin carboxyl-terminal hydrolase 14-like isoform X1 [Lupinus angustifolius] PREDICTED: ubiquitin carboxyl-terminal hydrolase 14-like isoform X5 [Lupinus angustifolius] PREDICTED: ubiquitin carboxyl-t…
XP_019421112.1+XP_019421113.1	0.16953	1.09	1.09	12	PREDICTED: DNA-directed RNA polymerase II subunit 1 isoform X1 [Lupinus angustifolius] PREDICTED: DNA-directed RNA polymerase II subunit 1 isoform X2 [Lupinus angustifolius]
XP_019416687.1	0.16953	0.85	1.18	5	PREDICTED: isoflavone reductase-like protein [Lupinus angustifolius]
XP_019434119.1+XP_019434118.1+XP_019434117.1+XP_019456158.1	0.17072	1.07	1.07	12	PREDICTED: NAD-dependent malic enzyme 2, mitochondrial-like isoform X3 [Lupinus angustifolius] PREDICTED: NAD-dependent malic enzyme 2, mitochondrial-like isoform X2 [Lupinus angustifolius] PREDICTED: NAD-dependent malic enzyme 2, mitochondrial-like isoform X1 [Lupinus angustifolius] PREDICTED: NAD-dependent malic enzyme 2, mitochondrial-like [Lupinus angustifolius]
XP_019436836.1	0.19309	0.94	1.06	3	PREDICTED: T-complex protein 1 subunit gamma-like [Lupinus angustifolius]
XP_019453371.1+XP_019453374.1+OIW06232.1	0.19346	0.90	1.11	4	PREDICTED: large proline-rich protein BAG6-like isoform X1 [Lupinus angustifolius] PREDICTED: large proline-rich protein BAG6-like isoform X2 [Lupinus angustifolius] hypothetical protein TanjilG_03857 [Lupinus angustifolius]
XP_019454269.1+OIW05625.1	0.20940	0.89	1.13	3	PREDICTED: nucleolin 1-like [Lupinus angustifolius] hypothetical protein TanjilG_23411 [Lupinus angustifolius]
XP_019415019.1	0.20940	1.04	1.04	5	PREDICTED: 3-oxo-Delta(4,5)-steroid 5-beta-reductase-like [Lupinus angustifolius]
XP_019454174.1+XP_019454173.1	0.21655	0.75	1.34	3	PREDICTED: glycine-rich RNA-binding protein GRP1A-like isoform X2 [Lupinus angustifolius] PREDICTED: glycine-rich RNA-binding protein GRP1A-like isoform X1 [Lupinus angustifolius]
XP_019416625.1	0.23610	1.20	1.20	2	PREDICTED: vacuolar-processing enzyme-like [Lupinus angustifolius]
XP_019431846.1+OIW20853.1	0.23693	1.04	1.04	3	PREDICTED: subtilisin-like protease SBT1.7 [Lupinus angustifolius] hypothetical protein TanjilG_24931 [Lupinus angustifolius]
XP_019463973.1	0.23926	0.96	1.05	12	PREDICTED: signal recognition particle subunit SRP72-like [Lupinus angustifolius]
YP_009127535.1+AQV09595.1	0.24317	1.12	1.12	6	acetyl-CoA carboxylase carboxyltransferase beta subunit (chloroplast) [Lupinus albus] acetyl-CoA carboxylase beta subunit (chloroplast) [Lupinus albus]
XP_019456768.1	0.24317	1.17	1.17	3	PREDICTED: GDSL esterase/lipase At2g04570-like [Lupinus angustifolius]
XP_019445420.1	0.24328	1.10	1.10	3	PREDICTED: glutamate--glyoxylate aminotransferase 2 [Lupinus angustifolius]
XP_019456619.1	0.24328	0.93	1.07	13	PREDICTED: protein DJ-1 homolog B-like [Lupinus angustifolius]
OIW12064.1+XP_019443140.1	0.24377	0.84	1.20	3	hypothetical protein TanjilG_24488 [Lupinus angustifolius] PREDICTED: succinate dehydrogenase subunit 5, mitochondrial-like [Lupinus angustifolius]
OIV99431.1+XP_019413436.1	0.24383	0.78	1.28	2	hypothetical protein TanjilG_17241 [Lupinus angustifolius] PREDICTED: ATPase family AAA domain-containing protein At1g05910 [Lupinus angustifolius]
XP_019462847.1	0.24555	0.76	1.32	2	PREDICTED: proteasome subunit alpha type-4-A-like [Lupinus angustifolius]
XP_019462452.1+XP_019462453.1	0.24555	0.93	1.07	7	PREDICTED: nucleosome assembly protein 1;2-like isoform X1 [Lupinus angustifolius] PREDICTED: nucleosome assembly protein 1;3-like isoform X2 [Lupinus angustifolius]
XP_019445342.1	0.24555	0.91	1.10	2	PREDICTED: 40S ribosomal protein S13-like [Lupinus angustifolius]
XP_019435639.1	0.24811	0.93	1.08	4	PREDICTED: protein transport protein SEC13 homolog B-like [Lupinus angustifolius]
XP_019427583.1	0.24811	1.13	1.13	5	PREDICTED: alpha-N-acetylglucosaminidase isoform X1 [Lupinus angustifolius]
XP_019431603.1	0.24878	0.81	1.23	2	PREDICTED: probable pyridoxal 5'-phosphate synthase subunit PDX1 [Lupinus angustifolius]
XP_019427287.1	0.24888	1.10	1.10	3	PREDICTED: hevamine-A-like [Lupinus angustifolius]
XP_019413228.1+XP_019413225.1+XP_019413227.1+XP_019413218.1+XP_019413226.1+XP_019413223.1+XP_019413219.1+XP_019413222.1+XP_019413224.1+XP_019413220.1+XP_019413221.1	0.24898	0.91	1.10	7	PREDICTED: nucleolin 1-like isoform X11 [Lupinus angustifolius] PREDICTED: nucleolin 1-like isoform X8 [Lupinus angustifolius] PREDICTED: nucleolin 1-like isoform X10 [Lupinus angustifolius] PREDICTED: nucleolin 2-like isoform X1 [Lupinus angustifolius] PREDICTED: nucleolin 1-like isoform X9 [Lupinus angustifolius] PREDICTED: nucleolin 1-like isoform X6 [Lupinus angustifolius] PREDICTED: nucleoli…
XP_019457066.1+OIW04494.1	0.24908	1.12	1.12	5	PREDICTED: probable 6-phosphogluconolactonase 4, chloroplastic [Lupinus angustifolius] hypothetical protein TanjilG_13876 [Lupinus angustifolius]
XP_019417085.1	0.24908	1.04	1.04	9	PREDICTED: alanine--glyoxylate aminotransferase 2 homolog 1, mitochondrial-like [Lupinus angustifolius]
OIW15825.1	0.24930	1.15	1.15	2	hypothetical protein TanjilG_04360 [Lupinus angustifolius]
XP_019426991.1	0.25022	0.90	1.12	3	PREDICTED: cell division control protein 2 homolog C [Lupinus angustifolius]
XP_019431528.1	0.25064	0.91	1.09	5	PREDICTED: lysine--tRNA ligase-like [Lupinus angustifolius]
XP_019423202.1	0.25247	1.09	1.09	6	PREDICTED: probable xyloglucan endotransglucosylase/hydrolase protein 8 [Lupinus angustifolius]
XP_019461378.1+OIW02645.1+XP_019456185.1+OIW04437.1	0.26177	1.00	1.00	2	PREDICTED: receptor protein kinase TMK1-like [Lupinus angustifolius] hypothetical protein TanjilG_29421 [Lupinus angustifolius] PREDICTED: receptor protein kinase TMK1-like [Lupinus angustifolius] hypothetical protein TanjilG_32629 [Lupinus angustifolius]
XP_019429892.1	0.26177	1.08	1.08	3	PREDICTED: uncharacterized protein At1g26090, chloroplastic [Lupinus angustifolius]
OIV92264.1+XP_019425046.1	0.26347	1.04	1.04	10	hypothetical protein TanjilG_00282 [Lupinus angustifolius] PREDICTED: D-lactate dehydrogenase [cytochrome], mitochondrial [Lupinus angustifolius]
XP_019419247.1	0.26514	0.95	1.05	5	PREDICTED: protein-lysine N-methyltransferase Mettl10 [Lupinus angustifolius]
OIV95293.1+XP_019418051.1+XP_019418049.1+XP_019418050.1+XP_019418047.1	0.26768	0.93	1.08	5	hypothetical protein TanjilG_07449 [Lupinus angustifolius] PREDICTED: late embryogenesis abundant protein D-29-like isoform X4 [Lupinus angustifolius] PREDICTED: late embryogenesis abundant protein D-29-like isoform X2 [Lupinus angustifolius] PREDICTED: late embryogenesis abundant protein D-29-like isoform X3 [Lupinus angustifolius] PREDICTED: late embryogenesis abundant protein D-29-like isoform…
XP_019417627.1+XP_019417626.1+OIV97069.1+CAD12839.3	0.26768	1.10	1.10	3	PREDICTED: nucleotide pyrophosphatase/phosphodiesterase-like isoform X2 [Lupinus angustifolius] PREDICTED: nucleotide pyrophosphatase/phosphodiesterase-like isoform X1 [Lupinus angustifolius] hypothetical protein TanjilG_14614 [Lupinus angustifolius] putative metallophosphatase [Lupinus luteus]
OIW02563.1+WP_072354057.1	0.26865	1.20	1.20	2	hypothetical protein TanjilG_24014 [Lupinus angustifolius] hypothetical protein [Paenibacillus sp. IHB B 3415]
XP_019417615.1	0.26999	0.91	1.10	3	PREDICTED: ribosome-binding factor PSRP1, chloroplastic [Lupinus angustifolius]
XP_019416761.1+XP_019438349.1	0.27025	0.97	1.03	14	PREDICTED: COP9 signalosome complex subunit 5b-like [Lupinus angustifolius] PREDICTED: COP9 signalosome complex subunit 5b-like [Lupinus angustifolius]
XP_019436807.1	0.27613	0.82	1.22	2	PREDICTED: kunitz-type elastase inhibitor BrEI-like [Lupinus angustifolius]
XP_019449862.1	0.27642	1.08	1.08	5	PREDICTED: subtilisin-like protease SBT2.5 [Lupinus angustifolius]
XP_019425637.1	0.28644	1.25	1.25	2	PREDICTED: polyphenol oxidase, chloroplastic-like [Lupinus angustifolius]
XP_019417887.1	0.28746	0.86	1.17	2	PREDICTED: prolyl-tRNA synthetase associated domain-containing protein 1-like [Lupinus angustifolius]
OIW13910.1+XP_019440107.1	0.28783	1.08	1.08	2	hypothetical protein TanjilG_31799 [Lupinus angustifolius] PREDICTED: ferredoxin--NADP reductase, root isozyme, chloroplastic [Lupinus angustifolius]
XP_019462204.1	0.28882	1.06	1.06	5	PREDICTED: 2-isopropylmalate synthase 2, chloroplastic-like [Lupinus angustifolius]
XP_019430389.1+OIW20105.1	0.31248	1.09	1.09	4	PREDICTED: basic 7S globulin-like [Lupinus angustifolius] hypothetical protein TanjilG_00612 [Lupinus angustifolius]
XP_019452463.1+OIW07351.1	0.31534	1.09	1.09	3	PREDICTED: acyl-coenzyme A thioesterase 9, mitochondrial [Lupinus angustifolius] hypothetical protein TanjilG_10186 [Lupinus angustifolius]
XP_019454054.1	0.32155	1.18	1.18	6	PREDICTED: osmotin-like protein [Lupinus angustifolius]
OIV98772.1+XP_019413540.1	0.32439	0.91	1.09	4	hypothetical protein TanjilG_20518 [Lupinus angustifolius] PREDICTED: 1,2-dihydroxy-3-keto-5-methylthiopentene dioxygenase 2-like [Lupinus angustifolius]
XP_019414008.1	0.32498	1.11	1.11	3	PREDICTED: protein SIEVE ELEMENT OCCLUSION B-like [Lupinus angustifolius]
XP_019444891.1+OIW11086.1	0.32498	0.89	1.13	2	PREDICTED: ubiquitin domain-containing protein DSK2b-like [Lupinus angustifolius] hypothetical protein TanjilG_22893 [Lupinus angustifolius]
XP_019427691.1+OIW16895.1	0.32539	0.85	1.17	3	PREDICTED: annexin-like protein RJ4 [Lupinus angustifolius] hypothetical protein TanjilG_01760 [Lupinus angustifolius]
XP_019455537.1	0.32781	1.05	1.05	4	PREDICTED: pectinesterase 3-like [Lupinus angustifolius]
XP_019427430.1+XP_019442909.1	0.32844	0.92	1.09	2	PREDICTED: aspartokinase 2, chloroplastic-like [Lupinus angustifolius] PREDICTED: aspartokinase 2, chloroplastic-like [Lupinus angustifolius]
OIW00157.1+XP_019463276.1	0.32844	0.94	1.07	7	hypothetical protein TanjilG_29147 [Lupinus angustifolius] PREDICTED: GPN-loop GTPase 1 [Lupinus angustifolius]
XP_019419096.1+XP_019442456.1	0.32870	1.11	1.11	8	PREDICTED: endoglucanase 25-like [Lupinus angustifolius] PREDICTED: endoglucanase 25-like [Lupinus angustifolius]
OIV95975.1	0.32935	1.04	1.04	6	hypothetical protein TanjilG_27079 [Lupinus angustifolius]
XP_019434748.1	0.33112	0.96	1.04	3	PREDICTED: cysteine proteinase inhibitor 6-like [Lupinus angustifolius]
XP_019438809.1	0.33112	1.14	1.14	7	PREDICTED: L-arabinokinase-like [Lupinus angustifolius]
OIV93139.1+XP_019423864.1	0.33138	0.98	1.02	5	hypothetical protein TanjilG_20801 [Lupinus angustifolius] PREDICTED: methylmalonate-semialdehyde dehydrogenase [acylating], mitochondrial-like [Lupinus angustifolius]
XP_019465188.1+XP_019427301.1+XP_019449623.1	0.33209	1.08	1.08	4	PREDICTED: probable methyltransferase PMT16 [Lupinus angustifolius] PREDICTED: probable methyltransferase PMT15 [Lupinus angustifolius] PREDICTED: probable methyltransferase PMT16 [Lupinus angustifolius]
XP_019449811.1	0.33209	1.05	1.05	7	PREDICTED: coatomer subunit alpha-2-like [Lupinus angustifolius]
XP_019448888.1+XP_019448887.1+XP_019448886.1	0.33243	1.06	1.06	3	PREDICTED: serine/threonine-protein phosphatase BSL3-like isoform X3 [Lupinus angustifolius] PREDICTED: serine/threonine-protein phosphatase BSL3-like isoform X2 [Lupinus angustifolius] PREDICTED: serine/threonine-protein phosphatase BSL3-like isoform X1 [Lupinus angustifolius]
XP_019461129.1	0.33243	0.90	1.11	4	PREDICTED: protein TIC110, chloroplastic-like [Lupinus angustifolius]
XP_019431406.1	0.33265	0.89	1.12	2	PREDICTED: phosphoglycerate mutase-like protein 1 [Lupinus angustifolius]
XP_019464004.1	0.33295	0.85	1.17	3	PREDICTED: annexin D2 [Lupinus angustifolius]
OIW15680.1+XP_019436812.1	0.33328	0.93	1.08	2	hypothetical protein TanjilG_09618 [Lupinus angustifolius] PREDICTED: alcohol dehydrogenase-like 6 [Lupinus angustifolius]
XP_019421361.1	0.33338	1.13	1.13	5	PREDICTED: L-ascorbate oxidase homolog [Lupinus angustifolius]
XP_019440635.1	0.33338	1.14	1.14	2	PREDICTED: aspartic proteinase-like [Lupinus angustifolius]
XP_019422681.1+OIV93650.1	0.33352	1.13	1.13	2	PREDICTED: disease resistance response protein 206-like [Lupinus angustifolius] hypothetical protein TanjilG_04882 [Lupinus angustifolius]
XP_019454021.1	0.33402	0.94	1.06	4	PREDICTED: E3 UFM1-protein ligase 1 homolog [Lupinus angustifolius]
XP_019464946.1	0.33411	1.11	1.11	9	PREDICTED: apoptosis-inducing factor homolog A-like [Lupinus angustifolius]
XP_019419717.1	0.33411	1.09	1.09	5	PREDICTED: aspartyl protease family protein 2-like [Lupinus angustifolius]
XP_019413980.1+OIV98571.1	0.33435	0.87	1.16	3	PREDICTED: uncharacterized protein LOC109325841 [Lupinus angustifolius] hypothetical protein TanjilG_12157 [Lupinus angustifolius]
XP_019452951.1	0.33492	1.10	1.10	11	PREDICTED: probable ubiquitin conjugation factor E4 [Lupinus angustifolius]
XP_019426459.1+XP_019432923.1	0.33522	1.07	1.07	4	PREDICTED: reactive Intermediate Deaminase A, chloroplastic-like [Lupinus angustifolius] PREDICTED: reactive Intermediate Deaminase A, chloroplastic-like [Lupinus angustifolius]
XP_019416821.1	0.33561	0.94	1.07	6	PREDICTED: eukaryotic translation initiation factor 2 subunit alpha homolog [Lupinus angustifolius]
XP_019433134.1	0.33561	1.09	1.09	12	PREDICTED: formate dehydrogenase 1, mitochondrial [Lupinus angustifolius]
OIV92194.1+XP_019425770.1+XP_019425771.1	0.33654	1.01	1.01	4	hypothetical protein TanjilG_30902 [Lupinus angustifolius] PREDICTED: 1,4-alpha-glucan-branching enzyme 1, chloroplastic/amyloplastic-like isoform X1 [Lupinus angustifolius] PREDICTED: 1,4-alpha-glucan-branching enzyme 1, chloroplastic/amyloplastic-like isoform X2 [Lupinus angustifolius]
XP_019461831.1	0.33654	1.18	1.18	2	PREDICTED: glutelin type-A 3-like [Lupinus angustifolius]
XP_019429823.1	0.33654	1.06	1.06	4	PREDICTED: L-gulonolactone oxidase 3-like [Lupinus angustifolius]
XP_019415526.1	0.33943	0.93	1.07	3	PREDICTED: PP2A regulatory subunit TAP46-like [Lupinus angustifolius]
XP_019415170.1+OIV98357.1	0.33946	0.91	1.09	11	PREDICTED: methylthioribose-1-phosphate isomerase [Lupinus angustifolius] hypothetical protein TanjilG_16684 [Lupinus angustifolius]
XP_019435785.1	0.33946	1.05	1.05	9	PREDICTED: probable serine/threonine-protein kinase At4g35230 isoform X1 [Lupinus angustifolius]
XP_019445323.1	0.34047	0.92	1.09	10	PREDICTED: UBX domain-containing protein 1-like [Lupinus angustifolius]
XP_019449424.1	0.34047	0.91	1.10	2	PREDICTED: 60S acidic ribosomal protein P2B-like [Lupinus angustifolius]
XP_019424365.1+OIW17232.1	0.34320	1.05	1.05	4	PREDICTED: serine/arginine-rich splicing factor RS31-like isoform X2 [Lupinus angustifolius] hypothetical protein TanjilG_02521 [Lupinus angustifolius]
XP_019452659.1	0.35258	0.92	1.09	3	PREDICTED: BSD domain-containing protein 1-like [Lupinus angustifolius]
XP_019427968.1+XP_019441636.1	0.35512	1.07	1.07	28	PREDICTED: splicing factor 3B subunit 3-like [Lupinus angustifolius] PREDICTED: splicing factor 3B subunit 3-like [Lupinus angustifolius]
XP_019446053.1	0.35512	0.89	1.13	4	PREDICTED: ubiquitin carboxyl-terminal hydrolase 3-like, partial [Lupinus angustifolius]
XP_019456468.1+XP_019435050.1+XP_019461195.1	0.35624	0.87	1.15	29	PREDICTED: alpha-1,4-glucan-protein synthase [UDP-forming] 2-like [Lupinus angustifolius] PREDICTED: alpha-1,4-glucan-protein synthase [UDP-forming] 2-like [Lupinus angustifolius] PREDICTED: alpha-1,4-glucan-protein synthase [UDP-forming] 2 [Lupinus angustifolius]
XP_019437609.1+XP_019415132.1+XP_019416645.1	0.36147	1.08	1.08	15	PREDICTED: inositol-3-phosphate synthase-like [Lupinus angustifolius] PREDICTED: inositol-3-phosphate synthase [Lupinus angustifolius] PREDICTED: inositol-3-phosphate synthase-like [Lupinus angustifolius]
XP_019454296.1	0.36226	0.87	1.16	3	PREDICTED: uncharacterized protein LOC109355543 [Lupinus angustifolius]
XP_019440909.1+OIW13265.1+OIV95500.1+XP_019427303.1+OIW16908.1	0.36850	0.94	1.06	14	PREDICTED: ankyrin repeat domain-containing protein 2A-like [Lupinus angustifolius] hypothetical protein TanjilG_25744 [Lupinus angustifolius] hypothetical protein TanjilG_23231 [Lupinus angustifolius] PREDICTED: ankyrin repeat domain-containing protein 2B-like [Lupinus angustifolius] hypothetical protein TanjilG_19213 [Lupinus angustifolius]
XP_019439474.1	0.37196	1.07	1.07	23	PREDICTED: protease Do-like 7 isoform X2 [Lupinus angustifolius]
XP_019427945.1	0.37215	1.04	1.04	4	PREDICTED: calcium-dependent protein kinase 11-like [Lupinus angustifolius]
XP_019453379.1	0.37215	1.10	1.10	5	PREDICTED: catalase isozyme 1-like [Lupinus angustifolius]
XP_019414685.1	0.37285	0.92	1.09	6	PREDICTED: DEAD-box ATP-dependent RNA helicase 37-like [Lupinus angustifolius]
OIV93028.1+XP_019423874.1+OIW10631.1	0.37340	1.06	1.06	6	hypothetical protein TanjilG_20690 [Lupinus angustifolius] PREDICTED: probable 1-deoxy-D-xylulose-5-phosphate synthase 2, chloroplastic [Lupinus angustifolius] hypothetical protein TanjilG_16003 [Lupinus angustifolius]
XP_019445317.1	0.37340	1.00	1.00	3	PREDICTED: probable ADP-ribosylation factor GTPase-activating protein AGD8 [Lupinus angustifolius]
XP_019443296.1	0.37618	1.08	1.08	5	PREDICTED: thiol protease aleurain-like [Lupinus angustifolius]
XP_019413900.1+XP_019413899.1	0.37686	0.84	1.19	3	PREDICTED: delta-1-pyrroline-5-carboxylate synthase-like isoform X2 [Lupinus angustifolius] PREDICTED: delta-1-pyrroline-5-carboxylate synthase-like isoform X1 [Lupinus angustifolius]
XP_019443828.1	0.37753	0.91	1.10	7	PREDICTED: caffeic acid 3-O-methyltransferase-like [Lupinus angustifolius]
XP_019461597.1	0.38015	0.90	1.11	6	PREDICTED: T-complex protein 1 subunit eta [Lupinus angustifolius]
XP_019419261.1	0.38015	1.18	1.18	4	PREDICTED: aspartic proteinase-like [Lupinus angustifolius]
OIW00164.1+XP_019463277.1	0.38015	0.88	1.13	4	hypothetical protein TanjilG_29154 [Lupinus angustifolius] PREDICTED: desiccation-related protein PCC13-62-like [Lupinus angustifolius]
OIW21213.1	0.38079	0.94	1.07	6	hypothetical protein TanjilG_31081 [Lupinus angustifolius]
XP_019445539.1	0.38576	1.14	1.14	2	PREDICTED: wall-associated receptor kinase-like 15 [Lupinus angustifolius]
XP_019424213.1	0.38576	1.08	1.08	4	PREDICTED: prostaglandin reductase-3-like [Lupinus angustifolius]
XP_019437056.1+OIW15474.1	0.38586	1.08	1.08	23	PREDICTED: ferredoxin-dependent glutamate synthase, chloroplastic [Lupinus angustifolius] hypothetical protein TanjilG_32878 [Lupinus angustifolius]
XP_019430752.1	0.38636	0.90	1.11	2	PREDICTED: uncharacterized protein LOC109338071 [Lupinus angustifolius]
XP_019450492.1	0.38695	0.83	1.20	2	PREDICTED: aldose reductase-like [Lupinus angustifolius]
XP_019421216.1	0.38707	1.07	1.07	7	PREDICTED: glutamate dehydrogenase 2 [Lupinus angustifolius]
XP_019421973.1	0.38707	0.96	1.05	5	PREDICTED: dnaJ protein ERDJ3B-like [Lupinus angustifolius]
XP_019461237.1	0.38998	1.06	1.06	13	PREDICTED: citrate synthase, glyoxysomal-like [Lupinus angustifolius]
XP_019416891.1+OIV96894.1+XP_019416892.1	0.39111	0.89	1.12	2	PREDICTED: uncharacterized protein LOC109328083 isoform X1 [Lupinus angustifolius] hypothetical protein TanjilG_00476 [Lupinus angustifolius] PREDICTED: uncharacterized protein LOC109328083 isoform X2 [Lupinus angustifolius]
XP_019446880.1	0.39111	0.84	1.19	3	PREDICTED: peptidyl-prolyl cis-trans isomerase Pin1 [Lupinus angustifolius]
XP_019415220.1	0.39167	0.95	1.06	16	PREDICTED: ribonuclease TUDOR 1-like [Lupinus angustifolius]
XP_019432080.1+XP_019432079.1	0.39222	1.10	1.10	2	PREDICTED: filament-like plant protein 3 isoform X2 [Lupinus angustifolius] PREDICTED: filament-like plant protein isoform X1 [Lupinus angustifolius]
XP_019453971.1	0.39383	1.22	1.22	2	PREDICTED: aquaporin PIP2-7-like [Lupinus angustifolius]
XP_019444390.1	0.39383	0.95	1.05	8	PREDICTED: diaminopimelate epimerase, chloroplastic [Lupinus angustifolius]
XP_019417518.1	0.39412	0.94	1.07	11	PREDICTED: developmentally-regulated G-protein 3 [Lupinus angustifolius]
OIV92538.1+XP_019425378.1+XP_019443636.1	0.39412	1.08	1.08	17	hypothetical protein TanjilG_02301 [Lupinus angustifolius] PREDICTED: citrate synthase, mitochondrial-like [Lupinus angustifolius] PREDICTED: citrate synthase, mitochondrial-like [Lupinus angustifolius]
XP_019442402.1+XP_019454461.1	0.39436	1.15	1.15	2	PREDICTED: plasma membrane ATPase 4 [Lupinus angustifolius] PREDICTED: plasma membrane ATPase 4-like, partial [Lupinus angustifolius]
XP_019445590.1+XP_019445588.1	0.39489	0.97	1.03	2	PREDICTED: dynamin-related protein 3A-like isoform X2 [Lupinus angustifolius] PREDICTED: dynamin-related protein 3A-like isoform X1 [Lupinus angustifolius]
XP_019462192.1+OIW01717.1	0.39515	1.19	1.19	3	PREDICTED: phosphoglucan phosphatase DSP4, amyloplastic [Lupinus angustifolius] hypothetical protein TanjilG_05170, partial [Lupinus angustifolius]
XP_019417267.1	0.39541	0.87	1.15	4	PREDICTED: uncharacterized protein LOC109328310 [Lupinus angustifolius]
XP_019462324.1	0.40156	0.81	1.23	3	PREDICTED: desiccation protectant protein Lea14 homolog [Lupinus angustifolius]
XP_019425261.1	0.40663	0.92	1.08	7	PREDICTED: eukaryotic translation initiation factor 3 subunit D-like isoform X1 [Lupinus angustifolius]
XP_019415819.1+XP_019415820.1	0.41166	0.94	1.07	5	PREDICTED: serine-threonine kinase receptor-associated protein-like isoform X1 [Lupinus angustifolius] PREDICTED: serine-threonine kinase receptor-associated protein-like isoform X2 [Lupinus angustifolius]
XP_019455431.1	0.41437	0.94	1.06	4	PREDICTED: V-type proton ATPase subunit D [Lupinus angustifolius]
OIW14317.1+XP_019439243.1	0.41932	1.06	1.06	4	hypothetical protein TanjilG_21457 [Lupinus angustifolius] PREDICTED: L-ascorbate oxidase-like [Lupinus angustifolius]
XP_019426639.1+OIW16957.1	0.41971	0.90	1.11	2	PREDICTED: protein MOR1-like [Lupinus angustifolius] hypothetical protein TanjilG_32824 [Lupinus angustifolius]
XP_019448495.1	0.42235	0.82	1.22	2	PREDICTED: hsp70 nucleotide exchange factor fes1-like [Lupinus angustifolius]
OIW14384.1+XP_019438781.1+XP_019447577.1+XP_019447576.1	0.42310	1.05	1.05	5	hypothetical protein TanjilG_15738 [Lupinus angustifolius] PREDICTED: CHD3-type chromatin-remodeling factor PICKLE-like [Lupinus angustifolius] PREDICTED: CHD3-type chromatin-remodeling factor PICKLE-like isoform X2 [Lupinus angustifolius] PREDICTED: CHD3-type chromatin-remodeling factor PICKLE-like isoform X1 [Lupinus angustifolius]
XP_019425560.1	0.42310	0.88	1.13	5	PREDICTED: adenosine kinase 2-like [Lupinus angustifolius]
XP_019427299.1	0.42568	1.05	1.05	11	PREDICTED: phosphoglucomutase, chloroplastic [Lupinus angustifolius]
OIW19363.1+XP_019443171.1	0.44130	0.93	1.08	4	hypothetical protein TanjilG_03497 [Lupinus angustifolius] PREDICTED: stress-response A/B barrel domain-containing protein UP3 [Lupinus angustifolius]
XP_019413282.1	0.44130	0.83	1.21	6	PREDICTED: glycine-rich RNA-binding protein GRP2A-like [Lupinus angustifolius]
XP_019449566.1+XP_019414157.1+XP_019435322.1	0.44234	1.07	1.07	2	PREDICTED: DNA-directed RNA polymerases II, IV and V subunit 8B-like [Lupinus angustifolius] PREDICTED: DNA-directed RNA polymerases II and V subunit 8A-like [Lupinus angustifolius] PREDICTED: DNA-directed RNA polymerases II and V subunit 8A-like [Lupinus angustifolius]
XP_019421899.1+XP_019421898.1	0.44234	0.91	1.10	6	PREDICTED: ras GTPase-activating protein-binding protein 2-like isoform X2 [Lupinus angustifolius] PREDICTED: ras GTPase-activating protein-binding protein 2-like isoform X1 [Lupinus angustifolius]
XP_019453880.1+XP_019453882.1+OIW06338.1	0.44262	0.87	1.15	2	PREDICTED: low-temperature-induced 78 kDa protein-like isoform X1 [Lupinus angustifolius] PREDICTED: low-temperature-induced 78 kDa protein-like isoform X3 [Lupinus angustifolius] hypothetical protein TanjilG_14983 [Lupinus angustifolius]
XP_019421804.1+OIV94880.1+XP_019444884.1	0.44290	0.96	1.04	15	PREDICTED: phosphoserine aminotransferase 2, chloroplastic-like [Lupinus angustifolius] hypothetical protein TanjilG_22077 [Lupinus angustifolius] PREDICTED: phosphoserine aminotransferase 2, chloroplastic-like [Lupinus angustifolius]
XP_019457680.1+OIW03736.1+XP_019457682.1	0.44370	1.10	1.10	2	PREDICTED: pre-mRNA-splicing factor ATP-dependent RNA helicase DEAH7 isoform X1 [Lupinus angustifolius] hypothetical protein TanjilG_30012 [Lupinus angustifolius] PREDICTED: pre-mRNA-splicing factor ATP-dependent RNA helicase DEAH7 isoform X2 [Lupinus angustifolius]
XP_019433237.1+XP_019447982.1+XP_019433234.1+XP_019448007.1	0.44398	1.03	1.03	6	PREDICTED: 6,7-dimethyl-8-ribityllumazine synthase, chloroplastic-like isoform X2 [Lupinus angustifolius] PREDICTED: 6,7-dimethyl-8-ribityllumazine synthase, chloroplastic-like isoform X1 [Lupinus angustifolius] PREDICTED: 6,7-dimethyl-8-ribityllumazine synthase, chloroplastic-like isoform X1 [Lupinus angustifolius] PREDICTED: 6,7-dimethyl-8-ribityllumazine synthase, chloroplastic-like isoform X2…
XP_019455897.1	0.45012	0.76	1.32	2	PREDICTED: CBL-interacting serine/threonine-protein kinase 3-like [Lupinus angustifolius]
XP_019453031.1	0.45036	0.98	1.02	11	PREDICTED: glucose-6-phosphate 1-dehydrogenase, cytoplasmic isoform-like isoform X1 [Lupinus angustifolius]
XP_019432110.1+XP_019458561.1	0.45271	0.89	1.12	2	PREDICTED: protein ACCUMULATION AND REPLICATION OF CHLOROPLASTS 6, chloroplastic-like [Lupinus angustifolius] PREDICTED: protein ACCUMULATION AND REPLICATION OF CHLOROPLASTS 6, chloroplastic-like [Lupinus angustifolius]
OIW08761.1+XP_019450832.1+XP_019450831.1+OIW08762.1	0.45294	0.92	1.09	4	hypothetical protein TanjilG_16342 [Lupinus angustifolius] PREDICTED: putative quinone-oxidoreductase homolog, chloroplastic isoform X2 [Lupinus angustifolius] PREDICTED: putative quinone-oxidoreductase homolog, chloroplastic isoform X1 [Lupinus angustifolius] hypothetical protein TanjilG_16343 [Lupinus angustifolius]
OIW11964.1	0.45526	0.89	1.12	9	hypothetical protein TanjilG_02171 [Lupinus angustifolius]
XP_019453889.1	0.46763	1.08	1.08	2	PREDICTED: alcohol-forming fatty acyl-CoA reductase-like [Lupinus angustifolius]
AAF86494.1	0.46763	1.14	1.14	9	NADH dehydrogenase subunit 9 (mitochondrion) [Lupinus luteus]
OIW08713.1+XP_019448494.1	0.46875	0.93	1.08	2	hypothetical protein TanjilG_03389 [Lupinus angustifolius] PREDICTED: phenylalanine--tRNA ligase alpha subunit, cytoplasmic-like [Lupinus angustifolius]
OIW10638.1+XP_019445352.1	0.46875	0.93	1.07	16	hypothetical protein TanjilG_16010 [Lupinus angustifolius] PREDICTED: probable cytosolic oligopeptidase A [Lupinus angustifolius]
XP_019448224.1+XP_019448225.1	0.46875	1.12	1.12	2	PREDICTED: beta-galactosidase 17 isoform X1 [Lupinus angustifolius] PREDICTED: beta-galactosidase 17 isoform X2 [Lupinus angustifolius]
XP_019457002.1	0.46875	1.20	1.20	2	PREDICTED: malonyl-CoA:anthocyanidin 5-O-glucoside-6''-O-malonyltransferase-like [Lupinus angustifolius]
OIW18351.1+XP_019456842.1	0.46925	0.92	1.08	2	hypothetical protein TanjilG_31491 [Lupinus angustifolius] PREDICTED: ubiquitin-conjugating enzyme E2-23 kDa-like [Lupinus angustifolius]
XP_019418655.1	0.46925	0.85	1.17	3	PREDICTED: soluble inorganic pyrophosphatase 6, chloroplastic-like [Lupinus angustifolius]
XP_019422293.1	0.47018	0.95	1.06	2	PREDICTED: 40S ribosomal protein S13-like [Lupinus angustifolius]
XP_019454205.1	0.47018	1.41	1.41	2	PREDICTED: cysteine protease RD19A-like [Lupinus angustifolius]
XP_019430556.1	0.47018	1.15	1.15	3	PREDICTED: peroxisome biogenesis protein 7 [Lupinus angustifolius]
XP_019444247.1	0.47025	0.94	1.06	2	PREDICTED: protein CIA1-like [Lupinus angustifolius]
XP_019421593.1	0.47025	1.05	1.05	9	PREDICTED: protein KINESIN LIGHT CHAIN-RELATED 3 [Lupinus angustifolius]
XP_019426095.1	0.47032	0.96	1.04	5	PREDICTED: angio-associated migratory cell protein [Lupinus angustifolius]
OIW09067.1+XP_019448081.1	0.47107	1.03	1.03	33	hypothetical protein TanjilG_16294 [Lupinus angustifolius] PREDICTED: pre-mRNA-processing-splicing factor 8A [Lupinus angustifolius]
XP_019436602.1	0.47107	0.87	1.15	3	PREDICTED: uncharacterized protein LOC109342965 [Lupinus angustifolius]
XP_019423334.1	0.47107	0.95	1.05	4	PREDICTED: glutathione S-transferase U17-like [Lupinus angustifolius]
XP_019413808.1+XP_019453888.1	0.47107	1.10	1.10	3	PREDICTED: fatty acyl-CoA reductase 3-like [Lupinus angustifolius] PREDICTED: fatty acyl-CoA reductase 3-like [Lupinus angustifolius]
XP_019415027.1+XP_019415024.1+XP_019416677.1+XP_019415025.1+OIV97621.1+XP_019415026.1+XP_019416678.1+XP_019416679.1	0.47112	1.12	1.12	3	PREDICTED: 5'-nucleotidase domain-containing protein 4-like isoform X4 [Lupinus angustifolius] PREDICTED: 5'-nucleotidase domain-containing protein 4-like isoform X1 [Lupinus angustifolius] PREDICTED: 5'-nucleotidase domain-containing protein 4 isoform X1 [Lupinus angustifolius] PREDICTED: 5'-nucleotidase domain-containing protein 4-like isoform X2 [Lupinus angustifolius] hypothetical protein Tan…
XP_019444254.1	0.47112	0.93	1.07	2	PREDICTED: protein TERMINAL FLOWER 1-like [Lupinus angustifolius]
XP_019425497.1+OIV91558.1	0.47127	0.92	1.09	3	PREDICTED: serine decarboxylase 1-like [Lupinus angustifolius] hypothetical protein TanjilG_08970 [Lupinus angustifolius]
XP_019424208.1	0.47127	1.16	1.16	3	PREDICTED: transcription factor Pur-alpha 1-like [Lupinus angustifolius]
XP_019421394.1+OIW17404.1	0.47132	1.11	1.11	3	PREDICTED: TBCC domain-containing protein 1-like isoform X1 [Lupinus angustifolius] hypothetical protein TanjilG_22516 [Lupinus angustifolius]
XP_019461335.1	0.47212	1.04	1.04	8	PREDICTED: uncharacterized protein LOC109360722 [Lupinus angustifolius]
XP_019458075.1+XP_019458073.1+OIW03530.1	0.47212	0.88	1.14	2	PREDICTED: filament-like plant protein 4 isoform X2 [Lupinus angustifolius] PREDICTED: filament-like plant protein 4 isoform X1 [Lupinus angustifolius] hypothetical protein TanjilG_30950 [Lupinus angustifolius]
XP_019453195.1	0.47212	0.96	1.04	4	PREDICTED: deSI-like protein At4g17486 [Lupinus angustifolius]
XP_019446792.1	0.47225	0.91	1.10	3	PREDICTED: caffeoyl-CoA O-methyltransferase-like [Lupinus angustifolius]
XP_019413565.1	0.47234	0.91	1.10	5	PREDICTED: pyruvate decarboxylase 2 isoform X1 [Lupinus angustifolius]
XP_019446222.1+OIW10077.1+XP_019446224.1	0.47234	1.09	1.09	2	PREDICTED: glucan endo-1,3-beta-glucosidase 3-like isoform X1 [Lupinus angustifolius] hypothetical protein TanjilG_32817 [Lupinus angustifolius] PREDICTED: glucan endo-1,3-beta-glucosidase 3-like isoform X2 [Lupinus angustifolius]
OIW12397.1+XP_019442560.1+XP_019442561.1	0.47256	1.03	1.03	4	hypothetical protein TanjilG_04146 [Lupinus angustifolius] PREDICTED: serine/threonine-protein kinase BLUS1-like isoform X1 [Lupinus angustifolius] PREDICTED: serine/threonine-protein kinase BLUS1-like isoform X2 [Lupinus angustifolius]
XP_019436729.1	0.47298	1.05	1.05	12	PREDICTED: dihydropyrimidine dehydrogenase (NADP(+)), chloroplastic [Lupinus angustifolius]
XP_019459122.1+XP_019463307.1+XP_019463308.1	0.47471	1.12	1.12	12	PREDICTED: cellulose synthase A catalytic subunit 2 [UDP-forming]-like [Lupinus angustifolius] PREDICTED: cellulose synthase A catalytic subunit 2 [UDP-forming]-like isoform X1 [Lupinus angustifolius] PREDICTED: cellulose synthase A catalytic subunit 2 [UDP-forming]-like isoform X2 [Lupinus angustifolius]
XP_019429231.1+OIW16577.1	0.47471	1.07	1.07	9	PREDICTED: alpha-L-fucosidase 3-like [Lupinus angustifolius] hypothetical protein TanjilG_00062 [Lupinus angustifolius]
OIV99938.1+XP_019463543.1+XP_019452170.1	0.47471	0.94	1.06	8	hypothetical protein TanjilG_26276 [Lupinus angustifolius] PREDICTED: serine-threonine kinase receptor-associated protein-like [Lupinus angustifolius] PREDICTED: serine-threonine kinase receptor-associated protein-like [Lupinus angustifolius]
XP_019433946.1+XP_019433955.1+OIV89648.1+OIV89042.1	0.47522	0.91	1.10	3	PREDICTED: hydroquinone glucosyltransferase-like [Lupinus angustifolius] PREDICTED: hydroquinone glucosyltransferase-like [Lupinus angustifolius] hypothetical protein TanjilG_12734 [Lupinus angustifolius] hypothetical protein TanjilG_31159 [Lupinus angustifolius]
XP_019457320.1	0.47577	1.06	1.06	3	PREDICTED: phosphoribosylglycinamide formyltransferase, chloroplastic-like [Lupinus angustifolius]
XP_019458064.1	0.47635	0.90	1.12	2	PREDICTED: calnexin homolog [Lupinus angustifolius]
XP_019462645.1+XP_019444296.1+XP_019461526.1	0.47635	0.95	1.05	35	PREDICTED: T-complex protein 1 subunit alpha-like [Lupinus angustifolius] PREDICTED: T-complex protein 1 subunit alpha [Lupinus angustifolius] PREDICTED: T-complex protein 1 subunit alpha-like [Lupinus angustifolius]
XP_019413372.1+OIV99583.1	0.47635	0.99	1.01	7	PREDICTED: alanine--tRNA ligase-like [Lupinus angustifolius] hypothetical protein TanjilG_17393 [Lupinus angustifolius]
XP_019452383.1	0.47635	0.89	1.12	3	PREDICTED: diphosphomevalonate decarboxylase MVD2, peroxisomal-like [Lupinus angustifolius]
XP_019440936.1	0.47688	1.10	1.10	3	PREDICTED: coatomer subunit alpha-2-like [Lupinus angustifolius]
XP_019448498.1	0.47688	0.88	1.14	5	PREDICTED: isoflavone reductase homolog [Lupinus angustifolius]
XP_019413956.1	0.47688	0.91	1.10	5	PREDICTED: glutathione S-transferase-like [Lupinus angustifolius]
XP_019445855.1	0.47701	0.90	1.11	2	PREDICTED: calcyclin-binding protein-like [Lupinus angustifolius]
XP_019425362.1+XP_019425359.1	0.47716	0.96	1.04	2	PREDICTED: clustered mitochondria protein-like isoform X3 [Lupinus angustifolius] PREDICTED: clustered mitochondria protein-like isoform X1 [Lupinus angustifolius]
XP_019463623.1	0.47716	0.95	1.05	4	PREDICTED: translation initiation factor eIF-2B subunit gamma [Lupinus angustifolius]
XP_019444628.1	0.47795	1.09	1.09	2	PREDICTED: long chain acyl-CoA synthetase 4-like [Lupinus angustifolius]
XP_019430110.1+OIW19935.1	0.47795	1.04	1.04	14	PREDICTED: probable alpha-mannosidase At5g13980 [Lupinus angustifolius] hypothetical protein TanjilG_30849 [Lupinus angustifolius]
OIV92802.1+XP_019423134.1	0.48685	1.06	1.06	7	hypothetical protein TanjilG_00936 [Lupinus angustifolius] PREDICTED: uncharacterized protein LOC109332605 isoform X1 [Lupinus angustifolius]
OIV98508.1+XP_019415349.1	0.48685	0.98	1.02	11	hypothetical protein TanjilG_18792 [Lupinus angustifolius] PREDICTED: leucine aminopeptidase 1-like [Lupinus angustifolius]
OIV92782.1+XP_019423988.1	0.49160	1.29	1.29	2	hypothetical protein TanjilG_00916 [Lupinus angustifolius] PREDICTED: 60S ribosomal protein L15-1-like isoform X1 [Lupinus angustifolius]
XP_019461583.1	0.49160	0.95	1.05	2	PREDICTED: COP9 signalosome complex subunit 1 [Lupinus angustifolius]
XP_019450010.1	0.49395	0.91	1.09	4	PREDICTED: nucleoside diphosphate kinase 1 [Lupinus angustifolius]
XP_019444553.1	0.49692	0.88	1.14	2	PREDICTED: cysteine synthase-like [Lupinus angustifolius]
XP_019445840.1	0.49692	1.15	1.15	3	PREDICTED: serine carboxypeptidase-like 50 [Lupinus angustifolius]
XP_019442129.1	0.49692	0.92	1.08	5	PREDICTED: ER membrane protein complex subunit 8/9 homolog [Lupinus angustifolius]
OIW19190.1+XP_019445381.1	0.49922	1.09	1.09	9	hypothetical protein TanjilG_04933 [Lupinus angustifolius] PREDICTED: beta-galactosidase 9 [Lupinus angustifolius]
OIV89325.1+XP_019434854.1	0.49984	1.02	1.02	2	hypothetical protein TanjilG_23288 [Lupinus angustifolius] PREDICTED: 14 kDa zinc-binding protein [Lupinus angustifolius]
XP_019418925.1+OIV96038.1+XP_019418926.1+XP_019418924.1	0.49984	0.95	1.06	6	PREDICTED: enhancer of mRNA-decapping protein 4-like isoform X2 [Lupinus angustifolius] hypothetical protein TanjilG_27142 [Lupinus angustifolius] PREDICTED: enhancer of mRNA-decapping protein 4-like isoform X3 [Lupinus angustifolius] PREDICTED: enhancer of mRNA-decapping protein 4-like isoform X1 [Lupinus angustifolius]
XP_019445304.1+XP_019445305.1+XP_019445303.1	0.50211	0.97	1.03	2	PREDICTED: 28 kDa ribonucleoprotein, chloroplastic isoform X2 [Lupinus angustifolius] PREDICTED: 28 kDa ribonucleoprotein, chloroplastic isoform X3 [Lupinus angustifolius] PREDICTED: 28 kDa ribonucleoprotein, chloroplastic isoform X1 [Lupinus angustifolius]
XP_019414964.1	0.50270	1.02	1.02	5	PREDICTED: uncharacterized protein LOC109326682 [Lupinus angustifolius]
XP_019435746.1+OIW16434.1	0.50270	0.88	1.14	2	PREDICTED: heterogeneous nuclear ribonucleoprotein 1 [Lupinus angustifolius] hypothetical protein TanjilG_19150 [Lupinus angustifolius]
XP_019462175.1+OIW02032.1	0.50494	0.95	1.05	2	PREDICTED: diphthamide biosynthesis protein 2 [Lupinus angustifolius] hypothetical protein TanjilG_13770 [Lupinus angustifolius]
XP_019459376.1	0.50663	0.86	1.17	3	PREDICTED: universal stress protein A-like protein [Lupinus angustifolius]
OIV91109.1+XP_019429153.1	0.50663	0.91	1.10	3	hypothetical protein TanjilG_30331 [Lupinus angustifolius] PREDICTED: probable carbohydrate esterase At4g34215 [Lupinus angustifolius]
XP_019446896.1	0.50663	0.94	1.07	2	PREDICTED: non-specific lipid-transfer protein 1-like [Lupinus angustifolius]
XP_019448643.1	0.50663	0.89	1.12	3	PREDICTED: UDP-glucuronic acid decarboxylase 6 [Lupinus angustifolius]
XP_019412784.1+XP_019412785.1+XP_019450401.1	0.50663	1.03	1.03	6	PREDICTED: alpha-galactosidase 1-like isoform X1 [Lupinus angustifolius] PREDICTED: alpha-galactosidase 1-like isoform X2 [Lupinus angustifolius] PREDICTED: alpha-galactosidase 1-like [Lupinus angustifolius]
OIW16101.1+XP_019432343.1	0.50716	1.13	1.13	4	hypothetical protein TanjilG_18816 [Lupinus angustifolius] PREDICTED: trans-cinnamate 4-monooxygenase [Lupinus angustifolius]
XP_019418762.1	0.50717	1.03	1.03	8	PREDICTED: protein PIR isoform X1 [Lupinus angustifolius]
XP_019459006.1	0.50717	1.08	1.08	3	PREDICTED: omega-hydroxypalmitate O-feruloyl transferase-like [Lupinus angustifolius]
XP_019412953.1+OIW17607.1	0.50933	1.06	1.06	2	PREDICTED: cellulose synthase-like protein G1 [Lupinus angustifolius] hypothetical protein TanjilG_28957 [Lupinus angustifolius]
XP_019443760.1	0.51361	1.04	1.04	38	PREDICTED: DExH-box ATP-dependent RNA helicase DExH12-like [Lupinus angustifolius]
XP_019450235.1	0.51361	1.09	1.09	4	PREDICTED: oxysterol-binding protein-related protein 3B-like [Lupinus angustifolius]
XP_019458354.1+XP_019458350.1	0.52320	0.92	1.08	5	PREDICTED: general negative regulator of transcription subunit 3-like isoform X2 [Lupinus angustifolius] PREDICTED: general negative regulator of transcription subunit 3-like isoform X1 [Lupinus angustifolius]
OIV94828.1	0.52528	1.16	1.16	3	hypothetical protein TanjilG_22025 [Lupinus angustifolius]
XP_019453942.1	0.52734	0.93	1.08	11	PREDICTED: ruBisCO large subunit-binding protein subunit alpha [Lupinus angustifolius]
XP_019421602.1	0.52940	0.89	1.13	4	PREDICTED: eukaryotic translation initiation factor 3 subunit G-like [Lupinus angustifolius]
OIV92077.1+XP_019425878.1	0.53144	0.96	1.04	2	hypothetical protein TanjilG_08750 [Lupinus angustifolius] PREDICTED: heat shock 70 kDa protein 16-like [Lupinus angustifolius]
XP_019421160.1+XP_019444660.1	0.53182	1.09	1.09	8	PREDICTED: tubulin beta-3 chain-like [Lupinus angustifolius] PREDICTED: tubulin beta-3 chain-like [Lupinus angustifolius]
XP_019451035.1	0.53182	0.79	1.26	2	PREDICTED: annexin-like protein RJ4 [Lupinus angustifolius]
XP_019441654.1	0.53383	1.07	1.07	6	PREDICTED: nitrilase-like protein 2 [Lupinus angustifolius]
ABU98948.1	0.53419	0.92	1.08	4	GDP-dissociation inhibitor [Lupinus albus]
XP_019425365.1	0.53419	1.05	1.05	4	PREDICTED: beta-xylosidase/alpha-L-arabinofuranosidase 1 [Lupinus angustifolius]
XP_019439298.1	0.54732	1.05	1.05	3	PREDICTED: isoleucine--tRNA ligase, chloroplastic/mitochondrial [Lupinus angustifolius]
XP_019448452.1	0.54732	0.88	1.13	2	PREDICTED: RNA-binding protein mde7 [Lupinus angustifolius]
XP_019440880.1	0.54732	1.08	1.08	2	PREDICTED: probable pectinesterase/pectinesterase inhibitor 47 [Lupinus angustifolius]
XP_019429274.1	0.54760	1.10	1.10	2	PREDICTED: 60S ribosomal protein L44 [Lupinus angustifolius]
XP_019443163.1+XP_019443164.1+XP_019443165.1+XP_019443161.1	0.54760	1.08	1.08	11	PREDICTED: exocyst complex component SEC3A isoform X3 [Lupinus angustifolius] PREDICTED: exocyst complex component SEC3A isoform X4 [Lupinus angustifolius] PREDICTED: exocyst complex component SEC3A isoform X5 [Lupinus angustifolius] PREDICTED: exocyst complex component SEC3A isoform X1 [Lupinus angustifolius]
XP_019433204.1	0.55308	1.05	1.05	3	PREDICTED: conserved oligomeric Golgi complex subunit 1-like [Lupinus angustifolius]
XP_019441409.1+XP_019452413.1	0.56209	0.95	1.05	2	PREDICTED: chaperone protein dnaJ 15 [Lupinus angustifolius] PREDICTED: chaperone protein dnaJ 15-like [Lupinus angustifolius]
XP_019423317.1	0.56396	0.97	1.03	5	PREDICTED: uncharacterized protein LOC109332754 isoform X1 [Lupinus angustifolius]
XP_019438444.1	0.56462	0.93	1.08	4	PREDICTED: ATP-dependent 6-phosphofructokinase 6-like isoform X1 [Lupinus angustifolius]
XP_019463669.1	0.56462	0.95	1.05	3	PREDICTED: uncharacterized protein LOC109362381 [Lupinus angustifolius]
XP_019435180.1+OIV89130.1	0.56462	1.08	1.08	4	PREDICTED: cationic peroxidase 1-like [Lupinus angustifolius] hypothetical protein TanjilG_26761 [Lupinus angustifolius]
OIV95153.1+XP_019419352.1	0.56462	0.89	1.13	2	hypothetical protein TanjilG_21543 [Lupinus angustifolius] PREDICTED: multisubstrate pseudouridine synthase 7 [Lupinus angustifolius]
XP_019417512.1+OIV96671.1	0.56581	0.94	1.06	2	PREDICTED: cell division cycle and apoptosis regulator protein 1-like [Lupinus angustifolius] hypothetical protein TanjilG_09213 [Lupinus angustifolius]
OIV96461.1+XP_019437787.1+XP_019437788.1+XP_019416866.1+OIW14980.1+XP_019416871.1+XP_019437784.1+XP_019437785.1+XP_019416867.1	0.56765	1.06	1.06	3	hypothetical protein TanjilG_07853 [Lupinus angustifolius] PREDICTED: CHD3-type chromatin-remodeling factor PICKLE-like isoform X3 [Lupinus angustifolius] PREDICTED: CHD3-type chromatin-remodeling factor PICKLE-like isoform X4 [Lupinus angustifolius] PREDICTED: CHD3-type chromatin-remodeling factor PICKLE-like isoform X1 [Lupinus angustifolius] hypothetical protein TanjilG_30699 [Lupinus angustif…
XP_019446855.1	0.56780	1.15	1.15	2	PREDICTED: hypersensitive-induced response protein 2-like [Lupinus angustifolius]
XP_019459406.1	0.56780	1.04	1.04	8	PREDICTED: uncharacterized protein LOC109359262 [Lupinus angustifolius]
XP_019424483.1	0.56823	0.90	1.11	6	PREDICTED: MLP-like protein 423 [Lupinus angustifolius]
XP_019449550.1	0.56823	1.08	1.08	3	PREDICTED: SCY1-like protein 2 [Lupinus angustifolius]
XP_019453683.1	0.56837	1.11	1.11	2	PREDICTED: uncharacterized protein LOC109355161 [Lupinus angustifolius]
XP_019459928.1+OIW02159.1	0.56837	0.88	1.13	3	PREDICTED: mitotic checkpoint protein BUB3.3-like [Lupinus angustifolius] hypothetical protein TanjilG_02383 [Lupinus angustifolius]
XP_019438637.1+XP_019438635.1	0.56850	0.91	1.09	2	PREDICTED: uncharacterized protein LOC109344342 isoform X2 [Lupinus angustifolius] PREDICTED: uncharacterized protein LOC109344342 isoform X1 [Lupinus angustifolius]
XP_019420824.1	0.56850	0.94	1.06	2	PREDICTED: protein HGV2-like [Lupinus angustifolius]
OIW16285.1+XP_019434739.1	0.57027	1.06	1.06	3	hypothetical protein TanjilG_19001 [Lupinus angustifolius] PREDICTED: vesicle-associated membrane protein 711-like [Lupinus angustifolius]
XP_019453181.1+XP_019453182.1	0.57040	0.93	1.08	24	PREDICTED: tripeptidyl-peptidase 2-like isoform X1 [Lupinus angustifolius] PREDICTED: tripeptidyl-peptidase 2-like isoform X2 [Lupinus angustifolius]
XP_019439852.1	0.57040	1.09	1.09	2	PREDICTED: thioredoxin H2 [Lupinus angustifolius]
XP_019463843.1	0.57052	0.96	1.05	3	PREDICTED: inositol-tetrakisphosphate 1-kinase 1-like [Lupinus angustifolius]
XP_019425297.1+XP_019425295.1	0.57052	0.91	1.09	3	PREDICTED: plant intracellular Ras-group-related LRR protein 6 isoform X2 [Lupinus angustifolius] PREDICTED: plant intracellular Ras-group-related LRR protein 6 isoform X1 [Lupinus angustifolius]
XP_019441943.1	0.57225	1.08	1.08	8	PREDICTED: serine carboxypeptidase-like 27 [Lupinus angustifolius]
XP_019414111.1+XP_019453672.1	0.57237	1.01	1.01	9	PREDICTED: aspartate aminotransferase, mitochondrial [Lupinus angustifolius] PREDICTED: LOW QUALITY PROTEIN: aspartate aminotransferase, mitochondrial-like, partial [Lupinus angustifolius]
XP_019433262.1	0.57237	1.04	1.04	2	PREDICTED: L-ascorbate oxidase homolog [Lupinus angustifolius]
XP_019449648.1	0.57248	0.89	1.13	5	PREDICTED: oxalate--CoA ligase-like [Lupinus angustifolius]
OIW07055.1+XP_019452324.1+XP_019440646.1+XP_019440648.1+OIW13436.1	0.57248	0.99	1.01	2	hypothetical protein TanjilG_02689 [Lupinus angustifolius] PREDICTED: DEAD-box ATP-dependent RNA helicase 3, chloroplastic-like [Lupinus angustifolius] PREDICTED: DEAD-box ATP-dependent RNA helicase 3, chloroplastic-like isoform X1 [Lupinus angustifolius] PREDICTED: DEAD-box ATP-dependent RNA helicase 3, chloroplastic-like isoform X3 [Lupinus angustifolius] hypothetical protein TanjilG_05326 [Lup…
XP_019417247.1+XP_019417248.1	0.57418	0.94	1.06	6	PREDICTED: eukaryotic translation initiation factor 3 subunit E-like [Lupinus angustifolius] PREDICTED: eukaryotic translation initiation factor 3 subunit E [Lupinus angustifolius]
XP_019460997.1	0.57428	0.94	1.06	5	PREDICTED: heat shock cognate 70 kDa protein 2-like [Lupinus angustifolius]
XP_019441866.1	0.57428	0.99	1.01	3	PREDICTED: late embryogenesis abundant protein D-34-like [Lupinus angustifolius]
XP_019429035.1	0.57438	1.07	1.07	5	PREDICTED: aspartyl protease family protein 2-like [Lupinus angustifolius]
XP_019434602.1	0.57438	0.94	1.06	8	PREDICTED: elongation factor 1-beta 2-like [Lupinus angustifolius]
XP_019444039.1+XP_019426181.1	0.57458	1.09	1.09	2	PREDICTED: glycerol-3-phosphate dehydrogenase [NAD(+)] GPDHC1, cytosolic [Lupinus angustifolius] PREDICTED: glycerol-3-phosphate dehydrogenase [NAD(+)] GPDHC1, cytosolic-like [Lupinus angustifolius]
XP_019442976.1+XP_019442968.1+XP_019454950.1+XP_019454957.1+OIW18723.1	0.57458	0.94	1.07	5	PREDICTED: nucleosome assembly protein 1;2-like isoform X2 [Lupinus angustifolius] PREDICTED: nucleosome assembly protein 1;3-like isoform X1 [Lupinus angustifolius] PREDICTED: nucleosome assembly protein 1;3-like isoform X1 [Lupinus angustifolius] PREDICTED: nucleosome assembly protein 1;3-like isoform X2 [Lupinus angustifolius] hypothetical protein TanjilG_13475 [Lupinus angustifolius]
XP_019443359.1+OIW11991.1	0.57458	1.11	1.11	2	PREDICTED: signal recognition particle 54 kDa protein 2 [Lupinus angustifolius] hypothetical protein TanjilG_02198 [Lupinus angustifolius]
XP_019446423.1	0.57468	0.88	1.14	2	PREDICTED: 60S ribosomal protein L31-like [Lupinus angustifolius]
XP_019424484.1+OIV92641.1	0.57468	1.05	1.05	4	PREDICTED: UDP-glucose 4-epimerase GEPI48-like [Lupinus angustifolius] hypothetical protein TanjilG_17992 [Lupinus angustifolius]
XP_019446577.1+OIW09874.1	0.57487	0.94	1.06	2	PREDICTED: uncharacterized protein LOC109349954 [Lupinus angustifolius] hypothetical protein TanjilG_24529 [Lupinus angustifolius]
YP_009127551.1+AQV09612.1+YP_008963626.1+YP_009446192.1	0.57487	1.16	1.16	3	clp protease proteolytic subunit (chloroplast) [Lupinus albus] ATP-dependent Clp protease proteolytic subunit (chloroplast) [Lupinus albus] ATP-dependent Clp protease proteolytic subunit (chloroplast) [Lupinus luteus] clp protease proteolytic subunit (chloroplast) [Lupinus westianus]
OIW06633.1+XP_019452832.1	0.57487	1.02	1.02	2	hypothetical protein TanjilG_04027 [Lupinus angustifolius] PREDICTED: alpha-L-fucosidase 1-like [Lupinus angustifolius]
XP_019461477.1+OIW01321.1	0.57496	1.11	1.11	3	PREDICTED: monocopper oxidase-like protein SKU5 [Lupinus angustifolius] hypothetical protein TanjilG_10482, partial [Lupinus angustifolius]
XP_019446346.1+OIW10003.1+XP_019446345.1+XP_019446347.1	0.57496	1.02	1.02	2	PREDICTED: NADPH:adrenodoxin oxidoreductase, mitochondrial isoform X2 [Lupinus angustifolius] hypothetical protein TanjilG_32743 [Lupinus angustifolius] PREDICTED: NADPH:adrenodoxin oxidoreductase, mitochondrial isoform X1 [Lupinus angustifolius] PREDICTED: NADPH:adrenodoxin oxidoreductase, mitochondrial isoform X3 [Lupinus angustifolius]
XP_019425529.1+XP_019430869.1+OIW20348.1	0.57606	1.07	1.07	16	PREDICTED: proteasome activator subunit 4-like [Lupinus angustifolius] PREDICTED: proteasome activator subunit 4-like [Lupinus angustifolius] hypothetical protein TanjilG_08893 [Lupinus angustifolius]
XP_019423533.1+XP_019446215.1	0.57632	0.93	1.07	6	PREDICTED: ubiquitin fusion degradation protein 1 homolog [Lupinus angustifolius] PREDICTED: ubiquitin fusion degradation protein 1 homolog [Lupinus angustifolius]
XP_019430219.1	0.57658	0.96	1.05	2	PREDICTED: ribonucleoside-diphosphate reductase large subunit-like [Lupinus angustifolius]
XP_019448572.1	0.57819	0.95	1.05	6	PREDICTED: fructokinase-2-like [Lupinus angustifolius]
XP_019463261.1+XP_019452345.1	0.57827	0.96	1.04	2	PREDICTED: ribosome biogenesis regulatory protein homolog [Lupinus angustifolius] PREDICTED: ribosome biogenesis regulatory protein homolog [Lupinus angustifolius]
XP_019431250.1	0.57827	0.79	1.26	5	PREDICTED: uncharacterized protein LOC109338458 [Lupinus angustifolius]
XP_019459310.1	0.58151	0.89	1.12	2	PREDICTED: probable glutathione S-transferase [Lupinus angustifolius]
XP_019455746.1	0.58151	1.03	1.03	2	PREDICTED: protein NETWORKED 4A [Lupinus angustifolius]
XP_019446204.1+XP_019459670.1	0.58151	1.07	1.07	13	PREDICTED: alpha,alpha-trehalose-phosphate synthase [UDP-forming] 6-like [Lupinus angustifolius] PREDICTED: alpha,alpha-trehalose-phosphate synthase [UDP-forming] 6-like [Lupinus angustifolius]
XP_019428452.1+OIV91194.1	0.58298	0.95	1.05	13	PREDICTED: uncharacterized protein LOC109336360 [Lupinus angustifolius] hypothetical protein TanjilG_30416 [Lupinus angustifolius]
XP_019418618.1+XP_019459748.1	0.58925	0.93	1.08	2	PREDICTED: ras-related protein RABA5c-like [Lupinus angustifolius] PREDICTED: ras-related protein Rab11A [Lupinus angustifolius]
XP_019440727.1+XP_019440736.1+XP_019440745.1+XP_019440753.1	0.58926	1.06	1.06	2	PREDICTED: bifunctional purple acid phosphatase 26 isoform X1 [Lupinus angustifolius] PREDICTED: bifunctional purple acid phosphatase 26 isoform X2 [Lupinus angustifolius] PREDICTED: bifunctional purple acid phosphatase 26 isoform X3 [Lupinus angustifolius] PREDICTED: bifunctional purple acid phosphatase 26 isoform X4 [Lupinus angustifolius]
XP_019438149.1+OIW14762.1	0.58926	1.09	1.09	5	PREDICTED: phosphatidylinositol 4-kinase alpha 1-like [Lupinus angustifolius] hypothetical protein TanjilG_05383 [Lupinus angustifolius]
XP_019443034.1+XP_019461531.1	0.59080	1.03	1.03	2	PREDICTED: zinc finger CCCH domain-containing protein 40-like [Lupinus angustifolius] PREDICTED: zinc finger CCCH domain-containing protein 4-like [Lupinus angustifolius]
XP_019421310.1+XP_019423377.1+XP_019423382.1+XP_019423381.1	0.59233	1.07	1.07	14	PREDICTED: probable methyltransferase PMT21 [Lupinus angustifolius] PREDICTED: probable methyltransferase PMT20 isoform X1 [Lupinus angustifolius] PREDICTED: probable methyltransferase PMT20 isoform X3 [Lupinus angustifolius] PREDICTED: probable methyltransferase PMT20 isoform X2 [Lupinus angustifolius]
XP_019435723.1	0.59995	0.90	1.11	12	PREDICTED: cytosolic enolase 3 [Lupinus angustifolius]
XP_019444219.1	0.60145	0.87	1.14	5	PREDICTED: uncharacterized protein LOC109348290 [Lupinus angustifolius]
XP_019427766.1+XP_019441334.1	0.60278	0.92	1.09	8	PREDICTED: 60S ribosomal protein L22-3-like [Lupinus angustifolius] PREDICTED: 60S ribosomal protein L22-3 [Lupinus angustifolius]
XP_019419809.1+OIV95073.1	0.60278	0.94	1.06	8	PREDICTED: uncharacterized protein LOC109330192 [Lupinus angustifolius] hypothetical protein TanjilG_10893 [Lupinus angustifolius]
XP_019437266.1+OIW15300.1	0.60278	0.90	1.12	5	PREDICTED: probable chalcone--flavonone isomerase 3 [Lupinus angustifolius] hypothetical protein TanjilG_10740 [Lupinus angustifolius]
XP_019415305.1	0.60278	1.15	1.15	2	PREDICTED: transport inhibitor response 1-like protein [Lupinus angustifolius]
XP_019425314.1	0.60442	1.09	1.09	5	PREDICTED: ATP-citrate synthase beta chain protein 1 [Lupinus angustifolius]
XP_019461843.1	0.60442	1.04	1.04	2	PREDICTED: protein transport protein SEC13 homolog A-like [Lupinus angustifolius]
XP_019428207.1	0.60590	0.99	1.01	10	PREDICTED: monodehydroascorbate reductase [Lupinus angustifolius]
XP_019459345.1	0.60692	0.94	1.06	2	PREDICTED: ubiquinone biosynthesis O-methyltransferase, mitochondrial [Lupinus angustifolius]
XP_019457732.1	0.60692	1.14	1.14	2	PREDICTED: omega-hydroxypalmitate O-feruloyl transferase-like [Lupinus angustifolius]
XP_019462109.1+OIW01732.1	0.60692	0.90	1.11	10	PREDICTED: tryptophan--tRNA ligase, cytoplasmic [Lupinus angustifolius] hypothetical protein TanjilG_03870 [Lupinus angustifolius]
OIV96122.1+XP_019419082.1	0.60834	1.12	1.12	2	hypothetical protein TanjilG_13054 [Lupinus angustifolius] PREDICTED: probable NAD(P)H dehydrogenase (quinone) FQR1-like 1 [Lupinus angustifolius]
XP_019454994.1	0.60850	0.95	1.05	3	PREDICTED: uncharacterized protein LOC109356110 [Lupinus angustifolius]
XP_019439848.1	0.60850	0.91	1.10	3	PREDICTED: pyrophosphate--fructose 6-phosphate 1-phosphotransferase subunit beta-like [Lupinus angustifolius]
XP_019460244.1	0.60850	0.88	1.13	2	PREDICTED: intracellular hyaluronan-binding protein 4-like [Lupinus angustifolius]
XP_019430698.1	0.60975	0.87	1.16	2	PREDICTED: non-specific lipid-transfer protein-like 1 [Lupinus angustifolius]
OIV95734.1+XP_019419384.1	0.61010	1.06	1.06	2	hypothetical protein TanjilG_05282 [Lupinus angustifolius] PREDICTED: GDSL esterase/lipase At1g29670-like [Lupinus angustifolius]
OIV93182.1+XP_019423070.1	0.61010	1.06	1.06	5	hypothetical protein TanjilG_20844 [Lupinus angustifolius] PREDICTED: bifunctional 3-dehydroquinate dehydratase/shikimate dehydrogenase, chloroplastic-like [Lupinus angustifolius]
XP_019440855.1	0.61019	0.95	1.05	13	PREDICTED: bifunctional protein FolD 2 [Lupinus angustifolius]
XP_019458070.1	0.61545	0.94	1.06	3	PREDICTED: clathrin interactor EPSIN 1 [Lupinus angustifolius]
XP_019425929.1	0.61545	0.95	1.05	11	PREDICTED: alcohol dehydrogenase class-3 [Lupinus angustifolius]
XP_019448451.1	0.61683	0.96	1.04	4	PREDICTED: mitogen-activated protein kinase kinase 5 [Lupinus angustifolius]
XP_019422371.1+OIV94235.1	0.61958	0.96	1.04	4	PREDICTED: transmembrane emp24 domain-containing protein p24delta9-like [Lupinus angustifolius] hypothetical protein TanjilG_08533 [Lupinus angustifolius]
XP_019451771.1+OIW06900.1	0.61958	1.15	1.15	2	PREDICTED: uncharacterized protein LOC109353867 [Lupinus angustifolius] hypothetical protein TanjilG_19549 [Lupinus angustifolius]
XP_019444343.1+XP_019444339.1	0.62054	1.07	1.07	7	PREDICTED: ethylene-insensitive protein 2-like isoform X2 [Lupinus angustifolius] PREDICTED: ethylene-insensitive protein 2-like isoform X1 [Lupinus angustifolius]
XP_019426405.1	0.62054	1.04	1.04	10	PREDICTED: putative lactoylglutathione lyase [Lupinus angustifolius]
XP_019426307.1	0.62054	1.14	1.14	4	PREDICTED: syntaxin-52-like [Lupinus angustifolius]
XP_019425525.1	0.62054	1.05	1.05	4	PREDICTED: eukaryotic translation initiation factor 3 subunit A-like [Lupinus angustifolius]
XP_019450350.1	0.62321	0.88	1.14	5	PREDICTED: ERBB-3 BINDING PROTEIN 1-like [Lupinus angustifolius]
XP_019449147.1+XP_019449148.1	0.62321	0.98	1.02	5	PREDICTED: protochlorophyllide reductase, chloroplastic isoform X1 [Lupinus angustifolius] PREDICTED: protochlorophyllide reductase, chloroplastic isoform X2 [Lupinus angustifolius]
XP_019429005.1	0.62366	0.96	1.05	4	PREDICTED: uncharacterized protein LOC109336706 [Lupinus angustifolius]
XP_019436860.1+OIW15590.1+XP_019436859.1+XP_019458592.1+XP_019436861.1	0.62366	0.93	1.08	2	PREDICTED: uncharacterized protein LOC109343151 isoform X2 [Lupinus angustifolius] hypothetical protein TanjilG_08166 [Lupinus angustifolius] PREDICTED: uncharacterized protein LOC109343151 isoform X1 [Lupinus angustifolius] PREDICTED: transcription factor RF2a-like [Lupinus angustifolius] PREDICTED: uncharacterized protein LOC109343151 isoform X3 [Lupinus angustifolius]
XP_019437082.1+OIW15488.1+XP_019437080.1+XP_019437081.1	0.62381	1.07	1.07	3	PREDICTED: hydroxymethylglutaryl-CoA lyase, mitochondrial-like isoform X3 [Lupinus angustifolius] hypothetical protein TanjilG_32892, partial [Lupinus angustifolius] PREDICTED: hydroxymethylglutaryl-CoA lyase, mitochondrial-like isoform X1 [Lupinus angustifolius] PREDICTED: hydroxymethylglutaryl-CoA lyase, mitochondrial-like isoform X2 [Lupinus angustifolius]
XP_019428849.1	0.62701	1.05	1.05	2	PREDICTED: uncharacterized protein LOC109336602 [Lupinus angustifolius]
XP_019441477.1	0.62701	1.01	1.01	3	PREDICTED: D-3-phosphoglycerate dehydrogenase 1, chloroplastic [Lupinus angustifolius]
XP_019463048.1	0.62718	1.08	1.08	5	PREDICTED: UPF0613 protein PB24D3.06c [Lupinus angustifolius]
XP_019442737.1	0.62718	0.95	1.06	6	PREDICTED: 40S ribosomal protein S19-1-like [Lupinus angustifolius]
XP_019419326.1	0.62718	0.92	1.09	2	PREDICTED: cysteine proteinase inhibitor [Lupinus angustifolius]
XP_019458722.1	0.62832	1.05	1.05	11	PREDICTED: V-type proton ATPase subunit C-like [Lupinus angustifolius]
XP_019414346.1+XP_019416530.1+OIV98438.1	0.63200	1.07	1.07	4	PREDICTED: ubiquitin carboxyl-terminal hydrolase 4-like isoform X1 [Lupinus angustifolius] PREDICTED: ubiquitin carboxyl-terminal hydrolase 4 [Lupinus angustifolius] hypothetical protein TanjilG_16765 [Lupinus angustifolius]
XP_019444448.1	0.63200	0.89	1.12	2	PREDICTED: target of Myb protein 1-like isoform X2 [Lupinus angustifolius]
OIW13347.1+XP_019440841.1	0.63200	1.06	1.06	2	hypothetical protein TanjilG_02867 [Lupinus angustifolius] PREDICTED: zerumbone synthase-like [Lupinus angustifolius]
XP_019430886.1	0.63328	1.07	1.07	12	PREDICTED: ABC transporter C family member 2-like isoform X1 [Lupinus angustifolius]
XP_019413609.1	0.63366	1.02	1.02	11	PREDICTED: elongation factor G-2, mitochondrial [Lupinus angustifolius]
OIV95602.1+XP_019419158.1	0.63366	0.97	1.03	8	hypothetical protein TanjilG_23833 [Lupinus angustifolius] PREDICTED: delta-1-pyrroline-5-carboxylate synthase-like [Lupinus angustifolius]
XP_019435797.1	0.63455	0.99	1.01	10	PREDICTED: epidermal growth factor receptor substrate 15-like [Lupinus angustifolius]
XP_019434428.1+XP_019434424.1	0.63561	0.94	1.06	2	PREDICTED: CBL-interacting serine/threonine-protein kinase 3-like isoform X2 [Lupinus angustifolius] PREDICTED: CBL-interacting serine/threonine-protein kinase 3-like isoform X1 [Lupinus angustifolius]
XP_019443740.1+OIW11667.1+XP_019443739.1	0.63561	0.94	1.06	3	PREDICTED: serine/arginine-rich splicing factor SR45-like isoform X2 [Lupinus angustifolius] hypothetical protein TanjilG_10813 [Lupinus angustifolius] PREDICTED: serine/arginine-rich splicing factor SR45-like isoform X1 [Lupinus angustifolius]
XP_019448602.1	0.63581	0.94	1.07	6	PREDICTED: universal stress protein PHOS32-like [Lupinus angustifolius]
XP_019460875.1+OIW02709.1	0.63666	1.07	1.07	7	PREDICTED: uncharacterized protein LOC109360431 [Lupinus angustifolius] hypothetical protein TanjilG_29485 [Lupinus angustifolius]
OIV98694.1+XP_019450038.1+XP_019413869.1	0.63666	0.94	1.06	2	hypothetical protein TanjilG_24865 [Lupinus angustifolius] PREDICTED: dynamin-related protein 1E-like [Lupinus angustifolius] PREDICTED: dynamin-related protein 1E-like [Lupinus angustifolius]
XP_019430997.1+OIW20395.1	0.63686	1.07	1.07	4	PREDICTED: pyruvate kinase 1, cytosolic [Lupinus angustifolius] hypothetical protein TanjilG_10565 [Lupinus angustifolius]
OIW11009.1+XP_019444772.1	0.63892	1.00	1.00	6	hypothetical protein TanjilG_22816 [Lupinus angustifolius] PREDICTED: putative glucose-6-phosphate 1-epimerase [Lupinus angustifolius]
XP_019423762.1	0.63892	0.98	1.02	3	PREDICTED: importin subunit beta-1-like [Lupinus angustifolius]
XP_019417657.1+XP_019417656.1	0.63892	0.93	1.07	7	PREDICTED: probable L-ascorbate peroxidase 6, chloroplastic isoform X2 [Lupinus angustifolius] PREDICTED: probable L-ascorbate peroxidase 6, chloroplastic isoform X1 [Lupinus angustifolius]
XP_019450946.1+OIW08835.1+XP_019450945.1	0.64058	0.91	1.10	3	PREDICTED: anamorsin homolog isoform X2 [Lupinus angustifolius] hypothetical protein TanjilG_16416 [Lupinus angustifolius] PREDICTED: anamorsin homolog isoform X1 [Lupinus angustifolius]
CCH47212.1+OIW15515.1+XP_019437036.1	0.64136	1.04	1.04	6	similar to vacuolar protein sorting-associated protein [Lupinus angustifolius] hypothetical protein TanjilG_27366 [Lupinus angustifolius] PREDICTED: vacuolar protein sorting-associated protein 18 homolog [Lupinus angustifolius]
XP_019461644.1	0.64136	0.97	1.04	13	PREDICTED: eukaryotic translation initiation factor 2 subunit gamma-like [Lupinus angustifolius]
XP_019421934.1	0.64258	0.82	1.21	3	PREDICTED: bifunctional dTDP-4-dehydrorhamnose 3,5-epimerase/dTDP-4-dehydrorhamnose reductase [Lupinus angustifolius]
XP_019439216.1+OIW14333.1	0.64378	1.16	1.16	2	PREDICTED: uncharacterized protein LOC109344947 [Lupinus angustifolius] hypothetical protein TanjilG_25119 [Lupinus angustifolius]
XP_019439220.1+XP_019439219.1	0.64499	1.07	1.07	2	PREDICTED: GLABROUS1 enhancer-binding protein-like isoform X2 [Lupinus angustifolius] PREDICTED: GLABROUS1 enhancer-binding protein-like isoform X1 [Lupinus angustifolius]
XP_019435775.1	0.64881	1.02	1.02	9	PREDICTED: coproporphyrinogen-III oxidase 1, chloroplastic-like isoform X1 [Lupinus angustifolius]
XP_019450049.1	0.64999	1.04	1.04	7	PREDICTED: acetylornithine aminotransferase, chloroplastic/mitochondrial [Lupinus angustifolius]
XP_019434255.1	0.65131	0.93	1.08	5	PREDICTED: T-complex protein 1 subunit eta-like [Lupinus angustifolius]
XP_019434144.1+XP_019434149.1	0.65131	0.97	1.03	6	PREDICTED: villin-3-like isoform X1 [Lupinus angustifolius] PREDICTED: villin-3-like isoform X2 [Lupinus angustifolius]
XP_019464575.1+XP_019456372.1+XP_019456388.1+XP_019456379.1	0.65131	0.98	1.03	3	PREDICTED: uncharacterized protein LOC109362929 [Lupinus angustifolius] PREDICTED: uncharacterized protein LOC109357099 isoform X1 [Lupinus angustifolius] PREDICTED: uncharacterized protein LOC109357099 isoform X3 [Lupinus angustifolius] PREDICTED: uncharacterized protein LOC109357099 isoform X2 [Lupinus angustifolius]
XP_019417400.1+OIV97524.1	0.65183	0.87	1.15	2	PREDICTED: apoptotic chromatin condensation inducer in the nucleus-like [Lupinus angustifolius] hypothetical protein TanjilG_11048 [Lupinus angustifolius]
OIW00827.1+XP_019463922.1+XP_019463927.1	0.65183	0.89	1.12	4	hypothetical protein TanjilG_08266 [Lupinus angustifolius] PREDICTED: peptidyl-prolyl cis-trans isomerase PASTICCINO1 isoform X1 [Lupinus angustifolius] PREDICTED: peptidyl-prolyl cis-trans isomerase PASTICCINO1 isoform X2 [Lupinus angustifolius]
XP_019444121.1+XP_019444117.1	0.65183	0.94	1.07	5	PREDICTED: uncharacterized protein LOC109348248 isoform X2 [Lupinus angustifolius] PREDICTED: uncharacterized protein LOC109348248 isoform X1 [Lupinus angustifolius]
XP_019436325.1	0.65235	0.91	1.10	2	PREDICTED: arogenate dehydratase/prephenate dehydratase 6, chloroplastic-like [Lupinus angustifolius]
XP_019449429.1	0.65235	0.89	1.13	3	PREDICTED: ATP-dependent Clp protease ATP-binding subunit CLPT1, chloroplastic-like [Lupinus angustifolius]
XP_019461952.1	0.65246	1.04	1.04	2	PREDICTED: aspartate--tRNA ligase 2, cytoplasmic-like [Lupinus angustifolius]
XP_019434398.1+OIV89547.1	0.65299	1.11	1.11	2	PREDICTED: acid beta-fructofuranosidase-like [Lupinus angustifolius] hypothetical protein TanjilG_19363 [Lupinus angustifolius]
XP_019456562.1	0.65352	0.96	1.04	3	PREDICTED: heterogeneous nuclear ribonucleoprotein R-like [Lupinus angustifolius]
XP_019462174.1+OIW01318.1	0.65475	1.08	1.08	3	PREDICTED: fimbrin-2-like [Lupinus angustifolius] hypothetical protein TanjilG_10479 [Lupinus angustifolius]
XP_019440569.1	0.65475	1.07	1.07	5	PREDICTED: sucrose nonfermenting 4-like protein isoform X2 [Lupinus angustifolius]
XP_019419285.1	0.66068	0.94	1.06	6	PREDICTED: protein INVOLVED IN DE NOVO 2-like [Lupinus angustifolius]
XP_019453204.1	0.66068	1.14	1.14	3	PREDICTED: beta-hexosaminidase 1-like [Lupinus angustifolius]
XP_019413083.1+XP_019413094.1	0.66097	0.99	1.01	3	PREDICTED: dnaJ protein homolog 1-like isoform X1 [Lupinus angustifolius] PREDICTED: dnaJ protein homolog 2-like isoform X2 [Lupinus angustifolius]
XP_019440135.1+XP_019440136.1	0.66180	1.04	1.04	4	PREDICTED: E3 ubiquitin-protein ligase UPL6-like isoform X1 [Lupinus angustifolius] PREDICTED: E3 ubiquitin-protein ligase UPL6-like isoform X2 [Lupinus angustifolius]
XP_019417535.1	0.66341	1.05	1.05	10	PREDICTED: mitogen-activated protein kinase homolog MMK1-like [Lupinus angustifolius]
OIW07483.1+XP_019450236.1	0.66341	0.97	1.04	5	hypothetical protein TanjilG_14429 [Lupinus angustifolius] PREDICTED: uncharacterized protein At5g02240-like [Lupinus angustifolius]
XP_019431581.1+XP_019431580.1+XP_019431578.1+XP_019431579.1	0.66341	1.01	1.01	17	PREDICTED: uncharacterized protein LOC109338738 isoform X4 [Lupinus angustifolius] PREDICTED: uncharacterized protein LOC109338738 isoform X3 [Lupinus angustifolius] PREDICTED: uncharacterized protein LOC109338738 isoform X1 [Lupinus angustifolius] PREDICTED: uncharacterized protein LOC109338738 isoform X2 [Lupinus angustifolius]
XP_019417504.1+XP_019417502.1	0.66402	1.15	1.15	2	PREDICTED: heparanase-like protein 3 isoform X2 [Lupinus angustifolius] PREDICTED: heparanase-like protein 3 isoform X1 [Lupinus angustifolius]
XP_019464601.1+OIW00666.1	0.66402	0.94	1.06	7	PREDICTED: SAL1 phosphatase [Lupinus angustifolius] hypothetical protein TanjilG_09635 [Lupinus angustifolius]
NP_001238237.1	0.66451	0.92	1.09	4	calmodulin [Glycine max]
OIW15224.1+XP_019437474.1	0.66512	1.03	1.03	4	hypothetical protein TanjilG_08816 [Lupinus angustifolius] PREDICTED: peptidyl-prolyl cis-trans isomerase CYP40-like [Lupinus angustifolius]
XP_019458469.1+XP_019458468.1	0.66668	1.04	1.04	7	PREDICTED: venom phosphodiesterase 2-like isoform X2 [Lupinus angustifolius] PREDICTED: venom phosphodiesterase 2-like isoform X1 [Lupinus angustifolius]
XP_019419862.1	0.66668	1.04	1.04	8	PREDICTED: ornithine aminotransferase, mitochondrial [Lupinus angustifolius]
XP_019449305.1	0.66714	0.93	1.08	19	PREDICTED: metacaspase-5-like [Lupinus angustifolius]
XP_019444844.1	0.66714	0.96	1.04	4	PREDICTED: ferredoxin--NADP reductase, leaf isozyme, chloroplastic [Lupinus angustifolius]
XP_019423964.1	0.66714	0.88	1.14	8	PREDICTED: hsp70-Hsp90 organizing protein 1-like [Lupinus angustifolius]
XP_019417321.1+XP_019417319.1	0.66821	1.17	1.17	3	PREDICTED: 3-oxo-Delta(4,5)-steroid 5-beta-reductase-like isoform X2 [Lupinus angustifolius] PREDICTED: 3-oxo-Delta(4,5)-steroid 5-beta-reductase-like isoform X1 [Lupinus angustifolius]
XP_019458736.1	0.66884	0.92	1.09	2	PREDICTED: putative methyltransferase DDB_G0268948 [Lupinus angustifolius]
OIW06565.1+XP_019452729.1	0.66884	1.05	1.05	8	hypothetical protein TanjilG_03959 [Lupinus angustifolius] PREDICTED: exocyst complex component SEC5A-like [Lupinus angustifolius]
XP_019441206.1+OIW13062.1+XP_019441204.1+XP_019441207.1+XP_019441205.1	0.67139	1.02	1.02	3	PREDICTED: probable Xaa-Pro aminopeptidase 3 isoform X3 [Lupinus angustifolius] hypothetical protein TanjilG_17622 [Lupinus angustifolius] PREDICTED: probable Xaa-Pro aminopeptidase 3 isoform X1 [Lupinus angustifolius] PREDICTED: probable Xaa-Pro aminopeptidase 3 isoform X4 [Lupinus angustifolius] PREDICTED: probable Xaa-Pro aminopeptidase 3 isoform X2 [Lupinus angustifolius]
XP_019459052.1+OIW02158.1	0.67139	0.83	1.21	2	PREDICTED: uncharacterized protein LOC109359013 [Lupinus angustifolius] hypothetical protein TanjilG_02382 [Lupinus angustifolius]
XP_019459279.1	0.67139	1.05	1.05	2	PREDICTED: uncharacterized protein LOC109359168 isoform X1 [Lupinus angustifolius]
XP_019435190.1+XP_019435188.1	0.67487	1.00	1.00	3	PREDICTED: U4/U6 small nuclear ribonucleoprotein Prp3-like isoform X2 [Lupinus angustifolius] PREDICTED: U4/U6 small nuclear ribonucleoprotein Prp3-like isoform X1 [Lupinus angustifolius]
XP_019431960.1	0.68244	0.97	1.03	2	PREDICTED: uncharacterized protein LOC109339053 [Lupinus angustifolius]
OIV98237.1+XP_019415489.1	0.68244	1.05	1.05	8	hypothetical protein TanjilG_09889 [Lupinus angustifolius] PREDICTED: probable acyl-activating enzyme 17, peroxisomal [Lupinus angustifolius]
XP_019455951.1	0.68244	0.91	1.10	2	PREDICTED: probable polyamine oxidase 2 [Lupinus angustifolius]
XP_019462205.1	0.68318	1.07	1.07	2	PREDICTED: ADP-ribosylation factor GTPase-activating protein AGD7-like [Lupinus angustifolius]
XP_019427688.1	0.68421	0.92	1.09	6	PREDICTED: glutathione S-transferase DHAR2-like [Lupinus angustifolius]
XP_019430651.1	0.69405	0.97	1.03	3	PREDICTED: cell division control protein 48 homolog D-like [Lupinus angustifolius]
XP_019430790.1	0.69405	1.00	1.00	7	PREDICTED: aldo-keto reductase family 4 member C9-like [Lupinus angustifolius]
XP_019439289.1+XP_019420027.1	0.69938	0.93	1.07	2	PREDICTED: protein pleiotropic regulatory locus 1-like [Lupinus angustifolius] PREDICTED: protein pleiotropic regulatory locus 1 [Lupinus angustifolius]
XP_019412770.1	0.69938	0.97	1.03	3	PREDICTED: L-ascorbate peroxidase, cytosolic-like [Lupinus angustifolius]
XP_019451002.1	0.69950	0.95	1.05	2	PREDICTED: fructose-bisphosphate aldolase 1, chloroplastic-like [Lupinus angustifolius]
XP_019446517.1+XP_019446516.1	0.69950	1.02	1.02	5	PREDICTED: endoglucanase 6 isoform X2 [Lupinus angustifolius] PREDICTED: endoglucanase 6 isoform X1 [Lupinus angustifolius]
XP_019420975.1+OIW17384.1	0.69950	1.04	1.04	2	PREDICTED: transmembrane 9 superfamily member 12 [Lupinus angustifolius] hypothetical protein TanjilG_22496 [Lupinus angustifolius]
OIW19877.1+XP_004296407.1	0.69961	0.92	1.09	8	hypothetical protein TanjilG_27244 [Lupinus angustifolius] PREDICTED: 60S ribosomal protein L23 [Fragaria vesca subsp. vesca]
XP_019452583.1	0.69961	0.97	1.03	2	PREDICTED: putative clathrin assembly protein At2g25430 [Lupinus angustifolius]
XP_019449299.1+OIW18858.1	0.69961	1.04	1.04	13	PREDICTED: protein transport protein SEC23 [Lupinus angustifolius] hypothetical protein TanjilG_25301 [Lupinus angustifolius]
OIW04694.1+XP_019456780.1	0.69961	1.05	1.05	2	hypothetical protein TanjilG_06760 [Lupinus angustifolius] PREDICTED: UDP-glycosyltransferase 89A2-like [Lupinus angustifolius]
XP_019455349.1+XP_019456422.1	0.69972	1.09	1.09	2	PREDICTED: 2-oxoglutarate dehydrogenase, mitochondrial-like [Lupinus angustifolius] PREDICTED: 2-oxoglutarate dehydrogenase, mitochondrial-like [Lupinus angustifolius]
XP_019412958.1	0.69972	1.01	1.01	3	PREDICTED: acetyl-coenzyme A carboxylase carboxyl transferase subunit alpha, chloroplastic-like [Lupinus angustifolius]
XP_019452181.1	0.69972	1.01	1.01	3	PREDICTED: uncharacterized protein LOC109354268 [Lupinus angustifolius]
OIW15285.1+XP_019437344.1	0.69972	0.92	1.09	5	hypothetical protein TanjilG_08082 [Lupinus angustifolius] PREDICTED: malignant T-cell-amplified sequence 1 homolog [Lupinus angustifolius]
XP_019430534.1+XP_019439657.1	0.69981	0.84	1.19	3	PREDICTED: probable pyridoxal 5'-phosphate synthase subunit PDX1 [Lupinus angustifolius] PREDICTED: pyridoxal 5'-phosphate synthase subunit PDX1.3 [Lupinus angustifolius]
XP_019429164.1	0.69982	1.07	1.07	5	PREDICTED: pirin-like protein [Lupinus angustifolius]
XP_019437854.1	0.69982	1.06	1.06	3	PREDICTED: glycine dehydrogenase (decarboxylating), mitochondrial-like isoform X1 [Lupinus angustifolius]
XP_019431365.1+OIW20593.1	0.69982	0.96	1.04	3	PREDICTED: putative 3,4-dihydroxy-2-butanone kinase [Lupinus angustifolius] hypothetical protein TanjilG_16092 [Lupinus angustifolius]
OIW01022.1+XP_019463733.1+OIW05336.1+XP_019455804.1	0.69982	0.96	1.04	2	hypothetical protein TanjilG_14205 [Lupinus angustifolius] PREDICTED: LOW QUALITY PROTEIN: uncharacterized protein LOC109362414 [Lupinus angustifolius] hypothetical protein TanjilG_28801 [Lupinus angustifolius] PREDICTED: uncharacterized protein LOC109356752 [Lupinus angustifolius]
XP_019425044.1+OIW17142.1	0.69982	0.88	1.14	5	PREDICTED: DNA polymerase alpha subunit B [Lupinus angustifolius] hypothetical protein TanjilG_21119 [Lupinus angustifolius]
XP_019414188.1+XP_019449856.1	0.70003	0.93	1.08	2	PREDICTED: GPN-loop GTPase 3-like [Lupinus angustifolius] PREDICTED: GPN-loop GTPase 3-like [Lupinus angustifolius]
XP_019427306.1	0.70003	0.95	1.05	2	PREDICTED: membrane steroid-binding protein 2-like isoform X1 [Lupinus angustifolius]
XP_019443008.1+OIW12192.1+XP_019443007.1	0.70003	1.09	1.09	2	PREDICTED: uncharacterized protein LOC109347552 isoform X2 [Lupinus angustifolius] hypothetical protein TanjilG_28600 [Lupinus angustifolius] PREDICTED: uncharacterized protein LOC109347552 isoform X1 [Lupinus angustifolius]
OIW12199.1+XP_019443021.1+XP_019455450.1+OIW04887.1	0.70003	1.08	1.08	2	hypothetical protein TanjilG_28607 [Lupinus angustifolius] PREDICTED: protein mago nashi homolog [Lupinus angustifolius] PREDICTED: protein mago nashi homolog [Lupinus angustifolius] hypothetical protein TanjilG_24003 [Lupinus angustifolius]
XP_019458162.1	0.70003	1.05	1.05	2	PREDICTED: scarecrow-like protein 11 [Lupinus angustifolius]
XP_019450561.1	0.70003	1.12	1.12	2	PREDICTED: tropinone reductase homolog At5g06060-like [Lupinus angustifolius]
XP_019428745.1+OIV91241.1+XP_019453489.1	0.70046	1.14	1.14	2	PREDICTED: macrophage erythroblast attacher-like [Lupinus angustifolius] hypothetical protein TanjilG_30463 [Lupinus angustifolius] PREDICTED: macrophage erythroblast attacher-like [Lupinus angustifolius]
XP_019420711.1	0.70056	1.05	1.05	4	PREDICTED: probable uridine nucleosidase 2 [Lupinus angustifolius]
OIW04485.1	0.70132	0.95	1.06	4	hypothetical protein TanjilG_24182 [Lupinus angustifolius]
OIV94333.1+XP_019422061.1	0.70132	0.91	1.09	4	hypothetical protein TanjilG_18298 [Lupinus angustifolius] PREDICTED: eukaryotic translation initiation factor 2A [Lupinus angustifolius]
XP_019460925.1	0.70145	1.02	1.02	8	PREDICTED: alpha-xylosidase 1-like isoform X1 [Lupinus angustifolius]
XP_019449367.1+XP_019449383.1+XP_019449392.1	0.70145	1.13	1.13	3	PREDICTED: 3-hydroxyisobutyryl-CoA hydrolase 1 isoform X1 [Lupinus angustifolius] PREDICTED: 3-hydroxyisobutyryl-CoA hydrolase 1 isoform X2 [Lupinus angustifolius] PREDICTED: 3-hydroxyisobutyryl-CoA hydrolase 1 isoform X3 [Lupinus angustifolius]
XP_019447879.1	0.70145	0.95	1.05	9	PREDICTED: protein disulfide isomerase-like 1-4 [Lupinus angustifolius]
OIV95666.1+XP_019418085.1	0.70319	0.84	1.19	5	hypothetical protein TanjilG_01460 [Lupinus angustifolius] PREDICTED: eukaryotic translation initiation factor 2 subunit beta-like [Lupinus angustifolius]
OIW12952.1+XP_019441366.1	0.70397	0.97	1.03	2	hypothetical protein TanjilG_15401 [Lupinus angustifolius] PREDICTED: protein RNA-directed DNA methylation 3 [Lupinus angustifolius]
XP_019452393.1+OIW18578.1+XP_019440025.1+OIW19754.1	0.70397	1.02	1.02	3	PREDICTED: uncharacterized protein LOC109354378 [Lupinus angustifolius] hypothetical protein TanjilG_13330 [Lupinus angustifolius] PREDICTED: uncharacterized protein LOC109345469 [Lupinus angustifolius] hypothetical protein TanjilG_18564 [Lupinus angustifolius]
XP_019464111.1	0.70489	0.93	1.08	4	PREDICTED: tRNA (cytosine(34)-C(5))-methyltransferase-like isoform X1 [Lupinus angustifolius]
OIW00813.1	0.70553	1.03	1.03	2	hypothetical protein TanjilG_08108 [Lupinus angustifolius]
XP_019412963.1+OIV98591.1	0.70553	1.14	1.14	3	PREDICTED: protein SSUH2 homolog [Lupinus angustifolius] hypothetical protein TanjilG_23030 [Lupinus angustifolius]
XP_019457664.1+XP_019463445.1	0.70553	0.96	1.04	2	PREDICTED: heavy metal-associated isoprenylated plant protein 7-like [Lupinus angustifolius] PREDICTED: heavy metal-associated isoprenylated plant protein 7-like [Lupinus angustifolius]
XP_019419806.1	0.70553	0.99	1.01	2	PREDICTED: protein YIF1B-like [Lupinus angustifolius]
XP_019443698.1	0.70553	0.96	1.04	3	PREDICTED: eukaryotic translation initiation factor 3 subunit K-like [Lupinus angustifolius]
XP_019458027.1	0.70553	0.97	1.03	5	PREDICTED: proteasome subunit beta type-3-A-like [Lupinus angustifolius]
XP_019448287.1	0.70553	1.04	1.04	10	PREDICTED: uncharacterized protein LOC109351303 [Lupinus angustifolius]
OIW03658.1+XP_019458672.1	0.70562	1.05	1.05	2	hypothetical protein TanjilG_30722 [Lupinus angustifolius] PREDICTED: nudix hydrolase 20, chloroplastic-like [Lupinus angustifolius]
XP_019454218.1+XP_019427870.1+XP_019454221.1+XP_019454219.1+OIW06609.1	0.70562	1.07	1.07	2	PREDICTED: methyltransferase-like protein 1 isoform X1 [Lupinus angustifolius] PREDICTED: methyltransferase-like protein 1 [Lupinus angustifolius] PREDICTED: methyltransferase-like protein 1 isoform X3 [Lupinus angustifolius] PREDICTED: methyltransferase-like protein 1 isoform X2 [Lupinus angustifolius] hypothetical protein TanjilG_04003 [Lupinus angustifolius]
OIW15185.1+XP_019437487.1	0.70562	0.88	1.14	2	hypothetical protein TanjilG_16443 [Lupinus angustifolius] PREDICTED: acyl-protein thioesterase 2-like [Lupinus angustifolius]
XP_019419019.1	0.70562	1.01	1.01	3	PREDICTED: cathepsin B-like [Lupinus angustifolius]
XP_019432492.1	0.70562	0.92	1.09	10	PREDICTED: gamma carbonic anhydrase 1, mitochondrial-like [Lupinus angustifolius]
XP_019431222.1	0.70562	0.95	1.05	7	PREDICTED: isopentenyl-diphosphate Delta-isomerase I [Lupinus angustifolius]
OIW11141.1+XP_019444593.1	0.70581	1.14	1.14	3	hypothetical protein TanjilG_22948 [Lupinus angustifolius] PREDICTED: 4-coumarate--CoA ligase 2 [Lupinus angustifolius]
XP_019443230.1+XP_019443234.1+XP_019443232.1+XP_019443233.1+XP_019443231.1	0.70649	1.04	1.04	2	PREDICTED: 5'-3' exoribonuclease 3-like isoform X1 [Lupinus angustifolius] PREDICTED: 5'-3' exoribonuclease 3-like isoform X5 [Lupinus angustifolius] PREDICTED: 5'-3' exoribonuclease 3-like isoform X3 [Lupinus angustifolius] PREDICTED: 5'-3' exoribonuclease 3-like isoform X4 [Lupinus angustifolius] PREDICTED: 5'-3' exoribonuclease 3-like isoform X2 [Lupinus angustifolius]
XP_019461072.1	0.70698	1.04	1.04	10	PREDICTED: subtilisin-like protease SBT1.5 [Lupinus angustifolius]
XP_019445849.1+XP_019442474.1+XP_019421822.1+XP_019434834.1	0.70698	0.93	1.07	4	PREDICTED: 40S ribosomal protein S17-like [Lupinus angustifolius] PREDICTED: 40S ribosomal protein S17-2-like [Lupinus angustifolius] PREDICTED: 40S ribosomal protein S17-4-like [Lupinus angustifolius] PREDICTED: 40S ribosomal protein S17-like [Lupinus angustifolius]
OIW21116.1+XP_019432326.1	0.70698	1.17	1.17	3	hypothetical protein TanjilG_29772 [Lupinus angustifolius] PREDICTED: guanine nucleotide exchange factor SPIKE 1-like [Lupinus angustifolius]
XP_019421957.1	0.70698	1.04	1.04	2	PREDICTED: plant intracellular Ras-group-related LRR protein 4-like [Lupinus angustifolius]
XP_019434843.1+OIV89323.1+XP_019434842.1	0.70698	1.03	1.03	5	PREDICTED: protein NAP1 isoform X2 [Lupinus angustifolius] hypothetical protein TanjilG_23286 [Lupinus angustifolius] PREDICTED: protein NAP1 isoform X1 [Lupinus angustifolius]
XP_019417168.1	0.70698	0.95	1.05	7	PREDICTED: protein disulfide-isomerase-like [Lupinus angustifolius]
XP_019430082.1	0.70783	0.91	1.10	5	PREDICTED: dihydrolipoyllysine-residue acetyltransferase component 4 of pyruvate dehydrogenase complex, chloroplastic-like [Lupinus angustifolius]
XP_019441444.1	0.70818	0.96	1.04	6	PREDICTED: fruit protein pKIWI502-like [Lupinus angustifolius]
XP_019417703.1	0.70818	1.08	1.08	2	PREDICTED: protein arginine N-methyltransferase 1.5-like isoform X1 [Lupinus angustifolius]
XP_019427049.1	0.70818	0.82	1.23	3	PREDICTED: peroxygenase 1-like [Lupinus angustifolius]
XP_019440833.1+XP_019419299.1	0.70822	1.12	1.12	4	PREDICTED: FT-interacting protein 1-like [Lupinus angustifolius] PREDICTED: FT-interacting protein 1-like [Lupinus angustifolius]
XP_019440331.1	0.70822	1.09	1.09	3	PREDICTED: probable cinnamyl alcohol dehydrogenase 1 [Lupinus angustifolius]
XP_019445778.1+OIW10177.1	0.70953	1.03	1.03	6	PREDICTED: probable carboxylesterase 12 [Lupinus angustifolius] hypothetical protein TanjilG_27928 [Lupinus angustifolius]
XP_019436194.1+OIW15719.1	0.70953	1.06	1.06	4	PREDICTED: LOW QUALITY PROTEIN: cysteine-rich repeat secretory protein 38-like [Lupinus angustifolius] hypothetical protein TanjilG_04254 [Lupinus angustifolius]
XP_019452142.1	0.70954	0.96	1.04	4	PREDICTED: AUGMIN subunit 5 [Lupinus angustifolius]
XP_019447613.1+OIW09314.1+XP_019447612.1	0.70954	0.94	1.07	5	PREDICTED: methionine aminopeptidase 2B-like isoform X2 [Lupinus angustifolius] hypothetical protein TanjilG_01285 [Lupinus angustifolius] PREDICTED: methionine aminopeptidase 2B-like isoform X1 [Lupinus angustifolius]
XP_019436497.1+OIW15901.1	0.70954	0.97	1.03	3	PREDICTED: WD-40 repeat-containing protein MSI4-like [Lupinus angustifolius] hypothetical protein TanjilG_04436 [Lupinus angustifolius]
OIW16318.1+XP_019435229.1+OIW02849.1+XP_019461545.1	0.70954	1.01	1.01	2	hypothetical protein TanjilG_19034 [Lupinus angustifolius] PREDICTED: mitogen-activated protein kinase 20-like [Lupinus angustifolius] hypothetical protein TanjilG_29625 [Lupinus angustifolius] PREDICTED: mitogen-activated protein kinase 20-like [Lupinus angustifolius]
OIW01128.1	0.70954	1.00	1.00	5	hypothetical protein TanjilG_25236 [Lupinus angustifolius]
XP_019443513.1+XP_019443515.1+XP_019443516.1	0.71080	1.05	1.05	6	PREDICTED: dihydrolipoyllysine-residue acetyltransferase component 2 of pyruvate dehydrogenase complex, mitochondrial-like isoform X1 [Lupinus angustifolius] PREDICTED: dihydrolipoyllysine-residue acetyltransferase component 2 of pyruvate dehydrogenase complex, mitochondrial-like isoform X2 [Lupinus angustifolius] PREDICTED: dihydrolipoyllysine-residue acetyltransferase component 3 of pyruvate de…
P49352.1	0.71080	0.93	1.08	2	RecName: Full=Farnesyl pyrophosphate synthase 2; Short=FPP synthase 2; Short=FPS 2; AltName: Full=(2E,6E)-farnesyl diphosphate synthase 2; AltName: Full=Dimethylallyltranstransferase 2; AltName: Full=Farnesyl diphosphate synthase 2; AltName: Full=Ge
XP_019415605.1	0.71080	0.96	1.04	9	PREDICTED: xylulose kinase [Lupinus angustifolius]
NP_001336712.1+XP_019456971.1+XP_017259015.1+NP_001276180.1	0.71080	1.13	1.13	3	ATP synthase subunit C superfamily protein [Glycine max] PREDICTED: V-type proton ATPase 16 kDa proteolipid subunit-like [Lupinus angustifolius] PREDICTED: V-type proton ATPase 16 kDa proteolipid subunit isoform X4 [Daucus carota subsp. sativus] uncharacterized protein LOC100815182 [Glycine max]
XP_019463865.1+XP_019464149.1	0.71124	1.03	1.03	14	PREDICTED: 1-deoxy-D-xylulose 5-phosphate reductoisomerase, chloroplastic-like [Lupinus angustifolius] PREDICTED: 1-deoxy-D-xylulose 5-phosphate reductoisomerase, chloroplastic-like [Lupinus angustifolius]
XP_019425714.1	0.71204	1.11	1.11	7	PREDICTED: vacuolar protein sorting-associated protein 29 [Lupinus angustifolius]
XP_019448001.1	0.71204	0.93	1.07	2	PREDICTED: cytidine deaminase 1-like [Lupinus angustifolius]
XP_019443248.1	0.71204	1.08	1.08	4	PREDICTED: tubulin beta chain-like [Lupinus angustifolius]
OIW14558.1+XP_019438476.1+XP_019438478.1+XP_019438479.1	0.71204	1.04	1.04	3	hypothetical protein TanjilG_14944 [Lupinus angustifolius] PREDICTED: BEACH domain-containing protein B isoform X1 [Lupinus angustifolius] PREDICTED: BEACH domain-containing protein B isoform X2 [Lupinus angustifolius] PREDICTED: BEACH domain-containing protein B isoform X3 [Lupinus angustifolius]
OIW14694.1+XP_019435351.1	0.71574	0.89	1.13	2	hypothetical protein TanjilG_33036 [Lupinus angustifolius] PREDICTED: serine/arginine-rich SC35-like splicing factor SCL30A [Lupinus angustifolius]
XP_019449482.1	0.71574	0.89	1.13	4	PREDICTED: probable cinnamyl alcohol dehydrogenase 6 [Lupinus angustifolius]
XP_019433306.1+XP_019433304.1+XP_019433305.1	0.72066	0.81	1.23	11	PREDICTED: embryonic protein DC-8-like isoform X3 [Lupinus angustifolius] PREDICTED: embryonic protein DC-8-like isoform X1 [Lupinus angustifolius] PREDICTED: embryonic protein DC-8-like isoform X2 [Lupinus angustifolius]
XP_019455492.1+OIW05475.1	0.72556	1.01	1.01	10	PREDICTED: glucose-6-phosphate 1-dehydrogenase 2, chloroplastic-like [Lupinus angustifolius] hypothetical protein TanjilG_12066 [Lupinus angustifolius]
XP_019427939.1	0.72918	0.91	1.10	2	PREDICTED: probable protein disulfide-isomerase A6 [Lupinus angustifolius]
XP_019455534.1	0.72918	1.00	1.00	5	PREDICTED: D-3-phosphoglycerate dehydrogenase 2, chloroplastic-like [Lupinus angustifolius]
XP_019427795.1+XP_019427793.1+OIV91264.1+XP_019427794.1	0.73153	1.03	1.03	3	PREDICTED: lysine-specific demethylase JMJ25-like isoform X3 [Lupinus angustifolius] PREDICTED: lysine-specific demethylase JMJ25-like isoform X1 [Lupinus angustifolius] hypothetical protein TanjilG_30486 [Lupinus angustifolius] PREDICTED: lysine-specific demethylase JMJ25-like isoform X2 [Lupinus angustifolius]
XP_019429278.1	0.73153	0.93	1.07	3	PREDICTED: dynamin-like protein ARC5 [Lupinus angustifolius]
XP_019458367.1	0.73153	0.92	1.09	5	PREDICTED: nucleosome assembly protein 1;4 [Lupinus angustifolius]
XP_019431513.1	0.73260	1.05	1.05	11	PREDICTED: villin-4-like [Lupinus angustifolius]
XP_019461528.1+OIW02811.1+XP_019461529.1	0.73260	0.89	1.13	2	PREDICTED: rho GTPase-activating protein 7-like isoform X1 [Lupinus angustifolius] hypothetical protein TanjilG_29587 [Lupinus angustifolius] PREDICTED: rho GTPase-activating protein 7-like isoform X2 [Lupinus angustifolius]
XP_019445474.1	0.73260	1.08	1.08	2	PREDICTED: AP-1 complex subunit gamma-2-like [Lupinus angustifolius]
XP_019454558.1+XP_019444406.1+XP_019444405.1+OIW11240.1	0.73260	1.13	1.13	3	PREDICTED: CLIP-associated protein-like [Lupinus angustifolius] PREDICTED: CLIP-associated protein-like isoform X2 [Lupinus angustifolius] PREDICTED: CLIP-associated protein-like isoform X1 [Lupinus angustifolius] hypothetical protein TanjilG_28331 [Lupinus angustifolius]
XP_019415229.1	0.73489	1.10	1.10	2	PREDICTED: sucrose synthase-like [Lupinus angustifolius]
XP_019438124.1	0.73489	1.04	1.04	4	PREDICTED: glyceraldehyde-3-phosphate dehydrogenase B, chloroplastic-like [Lupinus angustifolius]
OIW12088.1+XP_019443111.1+XP_019443112.1	0.73489	1.01	1.01	3	hypothetical protein TanjilG_24836 [Lupinus angustifolius] PREDICTED: beta-fructofuranosidase, insoluble isoenzyme CWINV3-like isoform X1 [Lupinus angustifolius] PREDICTED: beta-fructofuranosidase, insoluble isoenzyme CWINV3-like isoform X2 [Lupinus angustifolius]
OIW11390.1+XP_019444198.1	0.73842	0.92	1.09	2	hypothetical protein TanjilG_19646 [Lupinus angustifolius] PREDICTED: 33 kDa ribonucleoprotein, chloroplastic [Lupinus angustifolius]
XP_019432468.1+XP_019432467.1	0.73842	1.08	1.08	3	PREDICTED: uncharacterized protein LOC109339471 isoform X2 [Lupinus angustifolius] PREDICTED: uncharacterized protein LOC109339471 isoform X1 [Lupinus angustifolius]
XP_019426616.1	0.73942	1.08	1.08	4	PREDICTED: 4-coumarate--CoA ligase 1-like [Lupinus angustifolius]
XP_019436790.1	0.73942	0.93	1.07	5	PREDICTED: dolichyl-diphosphooligosaccharide--protein glycosyltransferase subunit STT3B-like [Lupinus angustifolius]
XP_019441732.1	0.73942	1.01	1.01	2	PREDICTED: glycerate dehydrogenase [Lupinus angustifolius]
XP_019428286.1	0.73942	1.06	1.06	4	PREDICTED: myosin-1-like [Lupinus angustifolius]
XP_019421721.1+XP_019421722.1+XP_019422627.1+OIV93519.1+XP_019422626.1	0.74017	0.93	1.07	2	PREDICTED: plant UBX domain-containing protein 8-like isoform X1 [Lupinus angustifolius] PREDICTED: plant UBX domain-containing protein 8-like isoform X2 [Lupinus angustifolius] PREDICTED: plant UBX domain-containing protein 8-like isoform X2 [Lupinus angustifolius] hypothetical protein TanjilG_28676 [Lupinus angustifolius] PREDICTED: plant UBX domain-containing protein 8-like isoform X1 [Lupinus…
OIW04960.1+XP_019455427.1+XP_019455428.1	0.74017	0.99	1.01	2	hypothetical protein TanjilG_01156 [Lupinus angustifolius] PREDICTED: 2-methoxy-6-polyprenyl-1,4-benzoquinol methylase, mitochondrial isoform X1 [Lupinus angustifolius] PREDICTED: 2-methoxy-6-polyprenyl-1,4-benzoquinol methylase, mitochondrial isoform X2 [Lupinus angustifolius]
XP_019462667.1	0.74017	0.95	1.05	2	PREDICTED: nuclear pore complex protein Nup214-like [Lupinus angustifolius]
XP_019442793.1	0.74017	0.93	1.08	7	PREDICTED: T-complex protein 1 subunit zeta 1-like [Lupinus angustifolius]
XP_019436794.1+XP_019457881.1	0.74017	1.08	1.08	15	PREDICTED: succinate--CoA ligase [ADP-forming] subunit alpha, mitochondrial [Lupinus angustifolius] PREDICTED: succinate--CoA ligase [ADP-forming] subunit alpha, mitochondrial-like [Lupinus angustifolius]
XP_019442895.1+XP_019442911.1	0.74017	0.95	1.06	2	PREDICTED: uncharacterized protein LOC109347474 isoform X1 [Lupinus angustifolius] PREDICTED: uncharacterized protein LOC109347474 isoform X2 [Lupinus angustifolius]
XP_019434686.1+OIV89406.1	0.74165	1.01	1.01	8	PREDICTED: putative oxidoreductase TDA3 [Lupinus angustifolius] hypothetical protein TanjilG_22221 [Lupinus angustifolius]
XP_019424127.1	0.74165	1.01	1.01	5	PREDICTED: calcium-dependent protein kinase 1 [Lupinus angustifolius]
XP_019460842.1	0.74165	0.95	1.06	8	PREDICTED: molybdopterin biosynthesis protein CNX1 isoform X1 [Lupinus angustifolius]
XP_019425997.1+XP_019425998.1	0.74332	1.06	1.06	3	PREDICTED: AUGMIN subunit 4-like isoform X1 [Lupinus angustifolius] PREDICTED: AUGMIN subunit 4-like isoform X2 [Lupinus angustifolius]
OIW00272.1+XP_019463063.1	0.74332	1.04	1.04	3	hypothetical protein TanjilG_27523 [Lupinus angustifolius] PREDICTED: conserved oligomeric Golgi complex subunit 2 [Lupinus angustifolius]
XP_019431810.1	0.74332	0.85	1.17	3	PREDICTED: pyridoxal 5'-phosphate synthase-like subunit PDX1.2 [Lupinus angustifolius]
XP_019434933.1+OIV89276.1	0.74332	0.96	1.04	2	PREDICTED: non-lysosomal glucosylceramidase [Lupinus angustifolius] hypothetical protein TanjilG_23736 [Lupinus angustifolius]
XP_019463961.1+XP_019419481.1+XP_019440119.1	0.74332	0.99	1.01	5	PREDICTED: tubulin beta chain-like [Lupinus angustifolius] PREDICTED: tubulin beta chain [Lupinus angustifolius] PREDICTED: tubulin beta chain-like [Lupinus angustifolius]
XP_019431472.1	0.74359	0.94	1.06	2	PREDICTED: probable carboxylesterase 8 isoform X1 [Lupinus angustifolius]
XP_019464624.1+XP_019433780.1	0.74359	1.12	1.12	3	PREDICTED: katanin p60 ATPase-containing subunit A-like 2 [Lupinus angustifolius] PREDICTED: katanin p60 ATPase-containing subunit A-like 2 [Lupinus angustifolius]
XP_019425841.1+XP_019425842.1	0.74791	1.03	1.03	2	PREDICTED: protein DEFECTIVE IN MERISTEM SILENCING 3-like isoform X1 [Lupinus angustifolius] PREDICTED: protein DEFECTIVE IN MERISTEM SILENCING 3-like isoform X2 [Lupinus angustifolius]
XP_019425605.1+OIV92177.1+XP_019425601.1+XP_019425602.1+XP_019425604.1+XP_019425603.1+XP_019425606.1	0.75125	1.06	1.06	3	PREDICTED: protein SHOOT GRAVITROPISM 6 isoform X5 [Lupinus angustifolius] hypothetical protein TanjilG_30818 [Lupinus angustifolius] PREDICTED: protein SHOOT GRAVITROPISM 6 isoform X1 [Lupinus angustifolius] PREDICTED: protein SHOOT GRAVITROPISM 6 isoform X2 [Lupinus angustifolius] PREDICTED: protein SHOOT GRAVITROPISM 6 isoform X4 [Lupinus angustifolius] PREDICTED: protein SHOOT GRAVITROPISM 6 …
XP_019421070.1+XP_019444758.1	0.75125	1.05	1.05	22	PREDICTED: succinate dehydrogenase [ubiquinone] flavoprotein subunit 1, mitochondrial [Lupinus angustifolius] PREDICTED: succinate dehydrogenase [ubiquinone] flavoprotein subunit, mitochondrial [Lupinus angustifolius]
XP_019444289.1+XP_019454666.1	0.75557	0.95	1.05	8	PREDICTED: enolase-like [Lupinus angustifolius] PREDICTED: enolase-like [Lupinus angustifolius]
XP_019424028.1	0.75557	1.01	1.01	5	PREDICTED: threonine--tRNA ligase, mitochondrial 1-like [Lupinus angustifolius]
OIW07196.1+XP_019453275.1+XP_019453277.1	0.75557	1.07	1.07	2	hypothetical protein TanjilG_10169 [Lupinus angustifolius] PREDICTED: glucan endo-1,3-beta-glucosidase 11 isoform X1 [Lupinus angustifolius] PREDICTED: glucan endo-1,3-beta-glucosidase 11 isoform X2 [Lupinus angustifolius]
XP_019442198.1+XP_019463640.1	0.75557	1.14	1.14	2	PREDICTED: diacylglycerol kinase 7-like [Lupinus angustifolius] PREDICTED: diacylglycerol kinase 7-like [Lupinus angustifolius]
XP_019435568.1	0.75557	1.03	1.03	6	PREDICTED: calcium-dependent protein kinase 1-like [Lupinus angustifolius]
XP_019465091.1+XP_019432510.1+XP_019451273.1+XP_019414202.1	0.75557	0.89	1.13	3	PREDICTED: probable 60S ribosomal protein L14 [Lupinus angustifolius] PREDICTED: probable 60S ribosomal protein L14 [Lupinus angustifolius] PREDICTED: probable 60S ribosomal protein L14 [Lupinus angustifolius] PREDICTED: probable 60S ribosomal protein L14 [Lupinus angustifolius]
XP_019454801.1	0.75580	1.05	1.05	2	PREDICTED: ubiquitin-activating enzyme E1 1-like [Lupinus angustifolius]
XP_019429995.1+XP_019429996.1+XP_019429993.1+XP_019429997.1+XP_019429994.1	0.75641	0.91	1.10	2	PREDICTED: WD repeat-containing protein 43-like isoform X3 [Lupinus angustifolius] PREDICTED: WD repeat-containing protein 43-like isoform X4 [Lupinus angustifolius] PREDICTED: WD repeat-containing protein 43-like isoform X1 [Lupinus angustifolius] PREDICTED: WD repeat-containing protein 43-like isoform X5 [Lupinus angustifolius] PREDICTED: WD repeat-containing protein 43-like isoform X2 [Lupinus…
XP_019415323.1	0.75641	1.08	1.08	3	PREDICTED: probable pectinesterase/pectinesterase inhibitor 34 [Lupinus angustifolius]
XP_019421384.1	0.75641	1.00	1.00	18	PREDICTED: regulator of nonsense transcripts 1 homolog [Lupinus angustifolius]
XP_019464368.1	0.75641	0.99	1.01	3	PREDICTED: gamma carbonic anhydrase-like 2, mitochondrial [Lupinus angustifolius]
XP_019462436.1+OIW17865.1	0.75713	0.97	1.03	4	PREDICTED: uncharacterized protein LOC109361431 [Lupinus angustifolius] hypothetical protein TanjilG_14111 [Lupinus angustifolius]
XP_019415487.1	0.75713	0.93	1.08	6	PREDICTED: protein disulfide-isomerase-like [Lupinus angustifolius]
OIW14749.1+XP_019438170.1	0.75713	1.26	1.26	2	hypothetical protein TanjilG_05370 [Lupinus angustifolius] PREDICTED: bifunctional dihydrofolate reductase-thymidylate synthase-like [Lupinus angustifolius]
XP_019454488.1+OIW20124.1+OIW04534.1+XP_019430415.1	0.75713	0.99	1.01	2	PREDICTED: 25.3 kDa vesicle transport protein-like [Lupinus angustifolius] hypothetical protein TanjilG_01897 [Lupinus angustifolius] hypothetical protein TanjilG_13916 [Lupinus angustifolius] PREDICTED: 25.3 kDa vesicle transport protein [Lupinus angustifolius]
OIW20492.1+XP_019418850.1+OIV95287.1	0.75713	1.03	1.03	3	hypothetical protein TanjilG_13558 [Lupinus angustifolius] PREDICTED: uncharacterized protein LOC109329610 isoform X2 [Lupinus angustifolius] hypothetical protein TanjilG_07443 [Lupinus angustifolius]
XP_019414681.1+OIV98476.1	0.75713	0.96	1.04	2	PREDICTED: DNA repair protein RAD50 [Lupinus angustifolius] hypothetical protein TanjilG_16803 [Lupinus angustifolius]
XP_019464583.1+OIW00744.1+XP_019437372.1+XP_019462199.1	0.75788	0.99	1.01	2	PREDICTED: putative clathrin assembly protein At2g01600 [Lupinus angustifolius] hypothetical protein TanjilG_09713 [Lupinus angustifolius] PREDICTED: putative clathrin assembly protein At2g01600 [Lupinus angustifolius] PREDICTED: putative clathrin assembly protein At2g01600 [Lupinus angustifolius]
XP_019439955.1	0.75788	1.04	1.04	3	PREDICTED: zeta-carotene desaturase, chloroplastic/chromoplastic [Lupinus angustifolius]
XP_019420182.1+OIV93972.1+XP_019420181.1	0.75788	0.96	1.05	6	PREDICTED: galacturonokinase-like isoform X2 [Lupinus angustifolius] hypothetical protein TanjilG_05675 [Lupinus angustifolius] PREDICTED: galacturonokinase-like isoform X1 [Lupinus angustifolius]
XP_019413982.1	0.75841	1.00	1.00	5	PREDICTED: kunitz-type trypsin inhibitor-like 2 protein [Lupinus angustifolius]
XP_019424332.1	0.75841	1.07	1.07	6	PREDICTED: bifunctional fucokinase/fucose pyrophosphorylase [Lupinus angustifolius]
OIW01295.1+XP_019461511.1	0.75841	0.99	1.01	2	hypothetical protein TanjilG_10456 [Lupinus angustifolius] PREDICTED: galacturonosyltransferase 8-like [Lupinus angustifolius]
XP_019421955.1	0.75872	0.94	1.06	2	PREDICTED: uncharacterized protein LOC109331730 [Lupinus angustifolius]
XP_019426305.1	0.75872	0.99	1.01	3	PREDICTED: 60S ribosomal protein L6-like [Lupinus angustifolius]
XP_019413858.1	0.75872	1.10	1.10	11	PREDICTED: gamma aminobutyrate transaminase 3, chloroplastic-like [Lupinus angustifolius]
XP_019461415.1	0.75872	0.94	1.06	2	PREDICTED: putative exosome complex component rrp40 [Lupinus angustifolius]
XP_019421947.1	0.76039	1.00	1.00	2	PREDICTED: transcription factor Pur-alpha 1-like [Lupinus angustifolius]
XP_019442139.1	0.76039	1.03	1.03	2	PREDICTED: pre-mRNA cleavage factor Im 25 kDa subunit 2 [Lupinus angustifolius]
XP_019416487.1	0.76039	1.12	1.12	3	PREDICTED: guanine nucleotide-binding protein subunit beta-1 [Lupinus angustifolius]
XP_019426216.1+OIV92158.1	0.76118	0.96	1.04	2	PREDICTED: dnaJ protein P58IPK homolog [Lupinus angustifolius] hypothetical protein TanjilG_18730 [Lupinus angustifolius]
OIV90013.1+XP_019429443.1+XP_019458029.1	0.76118	1.11	1.11	2	hypothetical protein TanjilG_00314 [Lupinus angustifolius] PREDICTED: LOW QUALITY PROTEIN: magnesium-protoporphyrin IX monomethyl ester [oxidative] cyclase, chloroplastic-like [Lupinus angustifolius] PREDICTED: magnesium-protoporphyrin IX monomethyl ester [oxidative] cyclase, chloroplastic-like [Lupinus angustifolius]
XP_019458932.1	0.76118	1.07	1.07	2	PREDICTED: outer envelope pore protein 24, chloroplastic-like [Lupinus angustifolius]
XP_019431010.1+XP_019433966.1	0.76118	0.92	1.09	6	PREDICTED: 14-3-3-like protein [Lupinus angustifolius] PREDICTED: 14-3-3-like protein [Lupinus angustifolius]
XP_019432407.1	0.76430	1.03	1.03	2	PREDICTED: uncharacterized protein LOC109339424 [Lupinus angustifolius]
XP_019414506.1+XP_019414507.1	0.76430	0.90	1.11	2	PREDICTED: uncharacterized protein LOC109326254 isoform X1 [Lupinus angustifolius] PREDICTED: uncharacterized protein LOC109326254 isoform X2 [Lupinus angustifolius]
XP_019452867.1+XP_019452869.1	0.76740	0.96	1.04	2	PREDICTED: DEAD-box ATP-dependent RNA helicase 46-like isoform X1 [Lupinus angustifolius] PREDICTED: DEAD-box ATP-dependent RNA helicase 46-like isoform X2 [Lupinus angustifolius]
XP_019425799.1+XP_019419458.1	0.76740	1.10	1.10	10	PREDICTED: DNA-directed RNA polymerase II subunit RPB2 [Lupinus angustifolius] PREDICTED: DNA-directed RNA polymerase II subunit RPB2-like [Lupinus angustifolius]
OIV97042.1+XP_019416743.1	0.77049	0.94	1.06	3	hypothetical protein TanjilG_11559 [Lupinus angustifolius] PREDICTED: calnexin homolog [Lupinus angustifolius]
XP_019440521.1	0.77049	0.96	1.04	9	PREDICTED: translation initiation factor eIF-2B subunit epsilon [Lupinus angustifolius]
OIW11423.1+XP_019444144.1	0.77237	0.99	1.01	2	hypothetical protein TanjilG_26789 [Lupinus angustifolius] PREDICTED: DNA damage-binding protein 1 isoform X2 [Lupinus angustifolius]
OIW04709.1+XP_019454483.1+CAD12837.1	0.77237	1.18	1.18	3	hypothetical protein TanjilG_07834 [Lupinus angustifolius] PREDICTED: probable inactive purple acid phosphatase 1 [Lupinus angustifolius] putative metallophosphatase [Lupinus luteus]
OIW11866.1+XP_019443469.1	0.77237	1.09	1.09	2	hypothetical protein TanjilG_00142 [Lupinus angustifolius] PREDICTED: casein kinase 1-like protein HD16 [Lupinus angustifolius]
XP_019464635.1+XP_019464636.1	0.77659	1.05	1.05	3	PREDICTED: polygalacturonase inhibitor 2-like isoform X3 [Lupinus angustifolius] PREDICTED: polygalacturonase inhibitor 2-like isoform X4 [Lupinus angustifolius]
XP_019464531.1	0.77809	0.86	1.16	2	PREDICTED: dirigent protein 22-like [Lupinus angustifolius]
XP_019455443.1	0.77809	1.07	1.07	11	PREDICTED: alpha-aminoadipic semialdehyde synthase [Lupinus angustifolius]
XP_019415451.1	0.77809	0.97	1.03	2	PREDICTED: cytochrome P450 98A2 [Lupinus angustifolius]
XP_019415356.1+XP_019415358.1	0.77809	1.03	1.03	5	PREDICTED: oxysterol-binding protein-related protein 1C-like isoform X1 [Lupinus angustifolius] PREDICTED: oxysterol-binding protein-related protein 1C-like isoform X3 [Lupinus angustifolius]
XP_019458294.1	0.77809	1.04	1.04	4	PREDICTED: uncharacterized protein LOC109358492 [Lupinus angustifolius]
XP_019461160.1	0.77809	1.05	1.05	9	PREDICTED: vacuolar protein-sorting-associated protein 11 homolog [Lupinus angustifolius]
OIV95390.1	0.77844	0.99	1.01	2	hypothetical protein TanjilG_06259 [Lupinus angustifolius]
XP_019421271.1+OIV93939.1	0.77844	0.97	1.03	2	PREDICTED: hydroxymethylglutaryl-CoA synthase-like [Lupinus angustifolius] hypothetical protein TanjilG_05642 [Lupinus angustifolius]
XP_019427692.1+OIV90275.1+XP_019442642.1	0.77844	1.02	1.02	6	PREDICTED: FACT complex subunit SSRP1 [Lupinus angustifolius] hypothetical protein TanjilG_08312 [Lupinus angustifolius] PREDICTED: FACT complex subunit SSRP1-like [Lupinus angustifolius]
XP_019441107.1	0.77911	0.95	1.06	7	PREDICTED: cycloartenol-C-24-methyltransferase [Lupinus angustifolius]
XP_019436423.1+XP_019436422.1	0.77911	0.92	1.09	4	PREDICTED: heat shock 70 kDa protein 15-like isoform X2 [Lupinus angustifolius] PREDICTED: heat shock 70 kDa protein 15-like isoform X1 [Lupinus angustifolius]
OIW20517.1+XP_019431215.1+XP_019431214.1	0.77911	0.94	1.07	4	hypothetical protein TanjilG_14046 [Lupinus angustifolius] PREDICTED: glutamine--fructose-6-phosphate aminotransferase [isomerizing] 2-like isoform X2 [Lupinus angustifolius] PREDICTED: glutamine--fructose-6-phosphate aminotransferase [isomerizing] 2-like isoform X1 [Lupinus angustifolius]
XP_019430748.1+XP_019430747.1+OIW20297.1	0.77911	0.93	1.07	4	PREDICTED: protein DEFECTIVE IN EXINE FORMATION 1 isoform X2 [Lupinus angustifolius] PREDICTED: protein DEFECTIVE IN EXINE FORMATION 1 isoform X1 [Lupinus angustifolius] hypothetical protein TanjilG_08257 [Lupinus angustifolius]
XP_019421696.1+OIV93798.1+XP_019421693.1+XP_019421695.1	0.77976	1.05	1.05	2	PREDICTED: protein RRC1-like isoform X3 [Lupinus angustifolius] hypothetical protein TanjilG_03761 [Lupinus angustifolius] PREDICTED: protein RRC1-like isoform X1 [Lupinus angustifolius] PREDICTED: protein RRC1-like isoform X2 [Lupinus angustifolius]
OIW10789.1+XP_019445113.1	0.77976	0.96	1.04	8	hypothetical protein TanjilG_27735 [Lupinus angustifolius] PREDICTED: AP-4 complex subunit epsilon-like [Lupinus angustifolius]
XP_019441818.1	0.77976	0.92	1.08	2	PREDICTED: BSD domain-containing protein 1-like [Lupinus angustifolius]
XP_019414049.1+OIV99559.1+XP_019414050.1+XP_019414051.1+XP_019414053.1+XP_019414048.1+XP_019414054.1+XP_019414055.1	0.77976	0.84	1.18	2	PREDICTED: cold shock protein 2-like isoform X2 [Lupinus angustifolius] hypothetical protein TanjilG_17369 [Lupinus angustifolius] PREDICTED: cold shock protein 2-like isoform X3 [Lupinus angustifolius] PREDICTED: glycine-rich protein 2-like isoform X4 [Lupinus angustifolius] PREDICTED: glycine-rich protein 2-like isoform X5 [Lupinus angustifolius] PREDICTED: cold shock protein 2-like isoform X1 …
XP_019423098.1	0.78104	0.91	1.10	8	PREDICTED: glucose and ribitol dehydrogenase homolog 1-like [Lupinus angustifolius]
XP_019461554.1	0.78104	1.08	1.08	2	PREDICTED: protein DMR6-LIKE OXYGENASE 1-like [Lupinus angustifolius]
OIV91217.1+XP_019428332.1	0.78167	1.06	1.06	7	hypothetical protein TanjilG_30439 [Lupinus angustifolius] PREDICTED: uncharacterized protein LOC109336282 isoform X1 [Lupinus angustifolius]
XP_019421684.1	0.78167	1.05	1.05	2	PREDICTED: phenylalanine ammonia-lyase class 2 [Lupinus angustifolius]
OIV98283.1+XP_019414309.1+XP_019439497.1	0.78167	0.93	1.08	4	hypothetical protein TanjilG_09917 [Lupinus angustifolius] PREDICTED: D-aminoacyl-tRNA deacylase-like [Lupinus angustifolius] PREDICTED: D-aminoacyl-tRNA deacylase [Lupinus angustifolius]
ACI22358.1	0.78167	1.01	1.01	3	5'-methylthioadenosine nucleosidase [Lupinus luteus]
XP_019458874.1	0.78229	0.95	1.06	4	PREDICTED: NECAP-like protein CG9132 [Lupinus angustifolius]
XP_019422361.1	0.78229	1.14	1.14	3	PREDICTED: long chain acyl-CoA synthetase 6, peroxisomal-like [Lupinus angustifolius]
XP_019431526.1+AAY42948.1+AAY42950.1	0.78229	1.15	1.15	2	PREDICTED: plasma membrane ATPase 4-like [Lupinus angustifolius] plasma membrane H+ ATPase [Lupinus albus] plasma membrane H+ ATPase [Lupinus albus]
OIW12726.1+XP_019441740.1	0.78229	1.05	1.05	6	hypothetical protein TanjilG_24659 [Lupinus angustifolius] PREDICTED: protein transport protein Sec24-like At4g32640 [Lupinus angustifolius]
XP_019435714.1	0.78291	0.94	1.06	5	PREDICTED: uridine kinase-like protein 3 [Lupinus angustifolius]
XP_019426254.1+XP_019443604.1+XP_019443602.1+XP_019437113.1+XP_019437114.1+OIV92549.1+OIW11744.1	0.78291	0.95	1.05	4	PREDICTED: chaperone protein dnaJ GFA2, mitochondrial-like [Lupinus angustifolius] PREDICTED: chaperone protein dnaJ GFA2, mitochondrial-like isoform X3 [Lupinus angustifolius] PREDICTED: chaperone protein dnaJ GFA2, mitochondrial-like isoform X1 [Lupinus angustifolius] PREDICTED: chaperone protein dnaJ GFA2, mitochondrial-like isoform X1 [Lupinus angustifolius] PREDICTED: chaperone protein dnaJ …
XP_019435596.1	0.78291	0.96	1.04	6	PREDICTED: aspartate--tRNA ligase 2, cytoplasmic-like [Lupinus angustifolius]
XP_019455952.1	0.78291	0.93	1.08	5	PREDICTED: oxygen-evolving enhancer protein 2, chloroplastic-like [Lupinus angustifolius]
XP_019422695.1+OIV93461.1	0.78352	1.00	1.00	2	PREDICTED: phosphoglycerate mutase-like protein 4 [Lupinus angustifolius] hypothetical protein TanjilG_21022, partial [Lupinus angustifolius]
XP_019456572.1	0.78352	1.14	1.14	2	PREDICTED: aquaporin PIP2-1-like [Lupinus angustifolius]
XP_019415013.1+OIV97784.1+XP_019415011.1	0.78352	0.94	1.06	3	PREDICTED: uncharacterized protein LOC109326711 isoform X2 [Lupinus angustifolius] hypothetical protein TanjilG_12541 [Lupinus angustifolius] PREDICTED: uncharacterized protein LOC109326711 isoform X1 [Lupinus angustifolius]
XP_019438512.1	0.78352	1.02	1.02	2	PREDICTED: 14-3-3-like protein B [Lupinus angustifolius]
OIV96011.1+XP_019418414.1	0.78484	1.03	1.03	2	hypothetical protein TanjilG_27115 [Lupinus angustifolius] PREDICTED: cysteine desulfurase 1, chloroplastic-like, partial [Lupinus angustifolius]
XP_019417208.1	0.78484	1.01	1.01	4	PREDICTED: eukaryotic translation initiation factor 3 subunit B-like [Lupinus angustifolius]
AMK47973.1+XP_019436444.1	0.78484	0.99	1.01	2	putative 30s ribosomal protein [Lupinus angustifolius] PREDICTED: 30S ribosomal protein S17, chloroplastic [Lupinus angustifolius]
XP_019443757.1+XP_019443756.1+XP_019443755.1	0.78484	0.88	1.13	2	PREDICTED: ribosomal L1 domain-containing protein 1-like isoform X3 [Lupinus angustifolius] PREDICTED: ribosomal L1 domain-containing protein 1-like isoform X2 [Lupinus angustifolius] PREDICTED: ribosomal L1 domain-containing protein 1-like isoform X1 [Lupinus angustifolius]
XP_019455725.1	0.78484	0.95	1.06	5	PREDICTED: hydroquinone glucosyltransferase-like [Lupinus angustifolius]
XP_019436410.1+XP_019436408.1+OIW15849.1	0.78484	0.93	1.08	3	PREDICTED: coatomer subunit beta'-2 isoform X2 [Lupinus angustifolius] PREDICTED: coatomer subunit beta'-2 isoform X1 [Lupinus angustifolius] hypothetical protein TanjilG_04384 [Lupinus angustifolius]
OIW12503.1+XP_019442153.1	0.78525	0.98	1.02	4	hypothetical protein TanjilG_04667 [Lupinus angustifolius] PREDICTED: serine/arginine-rich splicing factor RS41-like isoform X1 [Lupinus angustifolius]
YP_008963639.1+YP_009446205.1+YP_009127564.1+AQV09708.1+AQV09791.1	0.78525	0.92	1.09	5	ribosomal protein S3 (chloroplast) [Lupinus luteus] ribosomal protein S3 (chloroplast) [Lupinus westianus] ribosomal protein S3 (chloroplast) [Lupinus albus] ribosomal protein S3 (chloroplast) [Lupinus atlanticus] ribosomal protein S3 (chloroplast) [Lupinus micranthus]
XP_019423999.1+OIV93249.1+XP_019431348.1	0.78525	0.84	1.20	2	PREDICTED: 18.5 kDa class I heat shock protein-like [Lupinus angustifolius] hypothetical protein TanjilG_27427, partial [Lupinus angustifolius] PREDICTED: 18.5 kDa class I heat shock protein-like [Lupinus angustifolius]
OIW08204.1+XP_019449219.1+XP_019449220.1	0.78583	1.05	1.05	2	hypothetical protein TanjilG_15165 [Lupinus angustifolius] PREDICTED: probable LRR receptor-like serine/threonine-protein kinase At1g53430 isoform X1 [Lupinus angustifolius] PREDICTED: probable LRR receptor-like serine/threonine-protein kinase At1g53440 isoform X2 [Lupinus angustifolius]
XP_019439891.1+OIW13783.1	0.78583	1.06	1.06	9	PREDICTED: probable inactive serine/threonine-protein kinase scy1 [Lupinus angustifolius] hypothetical protein TanjilG_31672 [Lupinus angustifolius]
XP_019448565.1	0.78583	1.10	1.10	3	PREDICTED: probable E3 ubiquitin-protein ligase ARI7 [Lupinus angustifolius]
OIV97492.1+XP_019416828.1	0.78583	1.03	1.03	3	hypothetical protein TanjilG_11016 [Lupinus angustifolius] PREDICTED: very-long-chain 3-oxoacyl-CoA reductase 1-like [Lupinus angustifolius]
XP_019412921.1	0.78646	1.02	1.02	4	PREDICTED: hydroquinone glucosyltransferase-like [Lupinus angustifolius]
XP_019421702.1	0.78646	1.05	1.05	4	PREDICTED: protein CYPRO4 [Lupinus angustifolius]
XP_019414807.1+XP_019417328.1	0.78646	0.85	1.18	7	PREDICTED: S-adenosylmethionine synthase [Lupinus angustifolius] PREDICTED: S-adenosylmethionine synthase 2 [Lupinus angustifolius]
XP_019448798.1	0.78646	1.03	1.03	4	PREDICTED: serine carboxypeptidase-like 51 [Lupinus angustifolius]
XP_019418971.1	0.78646	1.09	1.09	3	PREDICTED: MLP-like protein 43 [Lupinus angustifolius]
XP_019464176.1+OIW00986.1+XP_019464177.1	0.78650	1.09	1.09	6	PREDICTED: glycine--tRNA ligase, chloroplastic/mitochondrial 2 isoform X1 [Lupinus angustifolius] hypothetical protein TanjilG_16235 [Lupinus angustifolius] PREDICTED: glycine--tRNA ligase, chloroplastic/mitochondrial 2 isoform X2 [Lupinus angustifolius]
XP_019433221.1	0.78650	1.08	1.08	3	PREDICTED: probable methyltransferase PMT14 [Lupinus angustifolius]
XP_019424711.1	0.78650	1.12	1.12	7	PREDICTED: probable NAD(P)H dehydrogenase (quinone) FQR1-like 1 [Lupinus angustifolius]
XP_019441685.1	0.78699	0.92	1.08	2	PREDICTED: E3 ubiquitin ligase BIG BROTHER-related-like isoform X2 [Lupinus angustifolius]
XP_019443211.1	0.78699	0.95	1.06	3	PREDICTED: ornithine carbamoyltransferase, chloroplastic-like [Lupinus angustifolius]
XP_019433225.1	0.78699	0.97	1.03	2	PREDICTED: alpha-amylase-like [Lupinus angustifolius]
OIV90311.1+XP_019427730.1	0.78699	0.97	1.03	4	hypothetical protein TanjilG_13166 [Lupinus angustifolius] PREDICTED: alpha-mannosidase 2-like [Lupinus angustifolius]
XP_019457563.1	0.78699	0.97	1.03	5	PREDICTED: N-alpha-acetyltransferase 16, NatA auxiliary subunit-like [Lupinus angustifolius]
XP_019433145.1+XP_019433136.1	0.78706	1.00	1.00	4	PREDICTED: folylpolyglutamate synthase-like isoform X2 [Lupinus angustifolius] PREDICTED: folylpolyglutamate synthase-like isoform X1 [Lupinus angustifolius]
XP_019444048.1+XP_019444047.1+XP_019444049.1+XP_019444045.1+XP_019444041.1	0.78706	1.05	1.05	10	PREDICTED: villin-3-like isoform X4 [Lupinus angustifolius] PREDICTED: villin-3-like isoform X3 [Lupinus angustifolius] PREDICTED: villin-3-like isoform X5 [Lupinus angustifolius] PREDICTED: villin-3-like isoform X2 [Lupinus angustifolius] PREDICTED: villin-3-like isoform X1 [Lupinus angustifolius]
XP_019449047.1	0.78706	1.06	1.06	12	PREDICTED: acyl-coenzyme A oxidase 3, peroxisomal [Lupinus angustifolius]
XP_019458529.1	0.78706	0.97	1.03	13	PREDICTED: ABC transporter F family member 3 [Lupinus angustifolius]
XP_019428712.1+XP_019428711.1	0.78710	0.95	1.05	2	PREDICTED: sorting nexin 1 isoform X2 [Lupinus angustifolius] PREDICTED: sorting nexin 1 isoform X1 [Lupinus angustifolius]
OIW19250.1+XP_019444743.1+XP_019444751.1	0.78710	0.99	1.01	2	hypothetical protein TanjilG_20375 [Lupinus angustifolius] PREDICTED: uncharacterized protein LOC109348675 isoform X1 [Lupinus angustifolius] PREDICTED: uncharacterized protein LOC109348675 isoform X2 [Lupinus angustifolius]
XP_019424064.1	0.78710	1.04	1.04	3	PREDICTED: chitinase domain-containing protein 1 [Lupinus angustifolius]
XP_019427896.1+XP_019427898.1	0.78710	1.03	1.03	2	PREDICTED: ATP-dependent 6-phosphofructokinase 4, chloroplastic isoform X1 [Lupinus angustifolius] PREDICTED: ATP-dependent 6-phosphofructokinase 4, chloroplastic isoform X2 [Lupinus angustifolius]
XP_019426781.1	0.78710	1.07	1.07	2	PREDICTED: malate dehydrogenase [NADP], chloroplastic-like [Lupinus angustifolius]
XP_019453945.1	0.78710	1.02	1.02	2	PREDICTED: protein CLP1 homolog [Lupinus angustifolius]
XP_019444924.1+OIW10910.1	0.78713	1.33	1.33	2	PREDICTED: probable amino-acid acetyltransferase NAGS2, chloroplastic [Lupinus angustifolius] hypothetical protein TanjilG_27856 [Lupinus angustifolius]
OIW13779.1+XP_019431514.1+XP_019426558.1	0.78713	0.93	1.07	3	hypothetical protein TanjilG_31668 [Lupinus angustifolius] PREDICTED: isopentenyl-diphosphate Delta-isomerase I-like [Lupinus angustifolius] PREDICTED: isopentenyl-diphosphate Delta-isomerase I-like [Lupinus angustifolius]
XP_019422097.1	0.78713	1.03	1.03	7	PREDICTED: NAD(P)H dehydrogenase (quinone) FQR1-like [Lupinus angustifolius]
XP_019429396.1	0.78713	0.97	1.04	7	PREDICTED: putative 4-hydroxy-4-methyl-2-oxoglutarate aldolase 2 [Lupinus angustifolius]
OIW15706.1+XP_019436169.1+XP_019436168.1	0.78713	1.00	1.00	2	hypothetical protein TanjilG_04241 [Lupinus angustifolius] PREDICTED: serine/threonine-protein phosphatase BSL3-like isoform X2 [Lupinus angustifolius] PREDICTED: serine/threonine-protein phosphatase BSL3-like isoform X1 [Lupinus angustifolius]
XP_019425697.1+XP_019425698.1	0.78753	1.10	1.10	3	PREDICTED: pre-mRNA-splicing factor CWC22 homolog isoform X1 [Lupinus angustifolius] PREDICTED: pre-mRNA-splicing factor CWC22 homolog isoform X2 [Lupinus angustifolius]
XP_019425408.1	0.78753	1.01	1.01	13	PREDICTED: protochlorophyllide reductase, chloroplastic [Lupinus angustifolius]
XP_019464026.1+OIW17732.1+XP_019464016.1	0.78753	1.01	1.01	2	PREDICTED: GDSL esterase/lipase At5g62930 isoform X2 [Lupinus angustifolius] hypothetical protein TanjilG_29082 [Lupinus angustifolius] PREDICTED: GDSL esterase/lipase At5g62930 isoform X1 [Lupinus angustifolius]
OIV93449.1+XP_019424065.1	0.78764	0.95	1.05	2	hypothetical protein TanjilG_10081 [Lupinus angustifolius] PREDICTED: microtubule-associated protein 70-2-like [Lupinus angustifolius]
XP_019415097.1	0.78764	1.03	1.03	6	PREDICTED: argininosuccinate lyase, chloroplastic-like [Lupinus angustifolius]
XP_019449043.1+XP_019449042.1	0.78764	0.99	1.01	2	PREDICTED: uncharacterized protein LOC109351847 isoform X2 [Lupinus angustifolius] PREDICTED: uncharacterized protein LOC109351847 isoform X1 [Lupinus angustifolius]
XP_019418912.1	0.78764	1.04	1.04	2	PREDICTED: enoyl-CoA delta isomerase 2, peroxisomal-like [Lupinus angustifolius]
OIW12171.1	0.78767	0.88	1.14	2	hypothetical protein TanjilG_28579 [Lupinus angustifolius]
OIV99341.1+XP_019413989.1	0.78767	0.97	1.03	2	hypothetical protein TanjilG_17151 [Lupinus angustifolius] PREDICTED: transmembrane protein 209 [Lupinus angustifolius]
XP_019430083.1+XP_019437182.1	0.78767	0.99	1.01	6	PREDICTED: ubiquitin-conjugating enzyme E2 27-like [Lupinus angustifolius] PREDICTED: ubiquitin-conjugating enzyme E2 27-like [Lupinus angustifolius]
XP_019450280.1	0.78767	0.97	1.03	6	PREDICTED: probable glutathione S-transferase [Lupinus angustifolius]
XP_019416841.1	0.78870	1.03	1.03	5	PREDICTED: phenylalanine ammonia-lyase class 3-like [Lupinus angustifolius]
XP_019445467.1	0.78870	0.94	1.06	2	PREDICTED: spermidine synthase 1-like [Lupinus angustifolius]
OIW04986.1+XP_019456360.1+XP_019456359.1	0.78870	0.99	1.01	2	hypothetical protein TanjilG_24458 [Lupinus angustifolius] PREDICTED: 7-dehydrocholesterol reductase isoform X2 [Lupinus angustifolius] PREDICTED: 7-dehydrocholesterol reductase isoform X1 [Lupinus angustifolius]
XP_019453051.1	0.78925	0.99	1.01	6	PREDICTED: delta(3,5)-Delta(2,4)-dienoyl-CoA isomerase, peroxisomal isoform X1 [Lupinus angustifolius]
XP_019418451.1	0.78925	0.92	1.08	3	PREDICTED: stromal 70 kDa heat shock-related protein, chloroplastic-like [Lupinus angustifolius]
XP_019457862.1	0.78925	0.93	1.07	4	PREDICTED: protein phosphatase PP2A regulatory subunit A [Lupinus angustifolius]
XP_019462614.1	0.79082	0.92	1.08	2	PREDICTED: 26S proteasome non-ATPase regulatory subunit 12 homolog A-like [Lupinus angustifolius]
XP_019421986.1	0.79082	1.01	1.01	3	PREDICTED: protein phosphatase methylesterase 1 [Lupinus angustifolius]
XP_019440758.1	0.79082	0.98	1.02	4	PREDICTED: 14-3-3-like protein D isoform X1 [Lupinus angustifolius]
XP_019424212.1	0.79812	1.10	1.10	3	PREDICTED: glutamine-dependent NAD(+) synthetase-like [Lupinus angustifolius]
XP_019427511.1+OIV91247.1	0.79812	1.00	1.00	3	PREDICTED: formate--tetrahydrofolate ligase-like [Lupinus angustifolius] hypothetical protein TanjilG_30469 [Lupinus angustifolius]
XP_019425449.1+XP_019425451.1+XP_019425448.1+XP_019425447.1+XP_019425450.1+XP_019425452.1	0.79965	1.14	1.14	2	PREDICTED: sister chromatid cohesion protein PDS5 homolog A-A-like isoform X3 [Lupinus angustifolius] PREDICTED: sister chromatid cohesion protein PDS5 homolog A-A-like isoform X5 [Lupinus angustifolius] PREDICTED: sister chromatid cohesion protein PDS5 homolog A-A-like isoform X2 [Lupinus angustifolius] PREDICTED: sister chromatid cohesion protein PDS5 homolog A-A-like isoform X1 [Lupinus angust…
XP_019439391.1	0.79965	1.09	1.09	2	PREDICTED: nuclear pore complex protein NUP88 [Lupinus angustifolius]
XP_019458197.1+XP_019458196.1	0.79965	0.87	1.15	3	PREDICTED: arginine--tRNA ligase, chloroplastic/mitochondrial-like isoform X2 [Lupinus angustifolius] PREDICTED: arginine--tRNA ligase, cytoplasmic-like isoform X1 [Lupinus angustifolius]
XP_019438310.1	0.80058	0.97	1.04	3	PREDICTED: uncharacterized protein LOC109344133 [Lupinus angustifolius]
XP_019463582.1+XP_019463580.1+XP_019463581.1	0.80058	0.99	1.01	8	PREDICTED: CCR4-NOT transcription complex subunit 1 isoform X3 [Lupinus angustifolius] PREDICTED: CCR4-NOT transcription complex subunit 1 isoform X1 [Lupinus angustifolius] PREDICTED: CCR4-NOT transcription complex subunit 1 isoform X2 [Lupinus angustifolius]
OIV92655.1	0.80058	0.95	1.06	6	hypothetical protein TanjilG_18006 [Lupinus angustifolius]
XP_019460874.1+XP_019460872.1	0.80058	1.01	1.01	6	PREDICTED: DEAD-box ATP-dependent RNA helicase 31-like isoform X3 [Lupinus angustifolius] PREDICTED: DEAD-box ATP-dependent RNA helicase 31-like isoform X1 [Lupinus angustifolius]
XP_019446782.1	0.80058	0.91	1.09	4	PREDICTED: RNA-binding protein Musashi homolog 1 [Lupinus angustifolius]
XP_019431428.1	0.80058	0.92	1.09	2	PREDICTED: proline synthase co-transcribed bacterial homolog protein [Lupinus angustifolius]
XP_019423588.1	0.80148	0.84	1.20	8	PREDICTED: pectinesterase-like [Lupinus angustifolius]
XP_019440708.1+OIW13408.1	0.80148	0.87	1.16	2	PREDICTED: glutamyl-tRNA(Gln) amidotransferase subunit A, chloroplastic/mitochondrial [Lupinus angustifolius] hypothetical protein TanjilG_19760 [Lupinus angustifolius]
XP_019439061.1+XP_019439074.1	0.80148	1.02	1.02	2	PREDICTED: uridine-cytidine kinase C isoform X1 [Lupinus angustifolius] PREDICTED: uridine-cytidine kinase C isoform X2 [Lupinus angustifolius]
XP_019458808.1	0.80148	0.98	1.02	6	PREDICTED: ornithine carbamoyltransferase, chloroplastic-like [Lupinus angustifolius]
XP_019428249.1	0.80148	1.10	1.10	7	PREDICTED: uricase-2 isozyme 1-like [Lupinus angustifolius]
XP_019435600.1	0.80148	0.96	1.04	3	PREDICTED: uncharacterized protein At2g39795, mitochondrial [Lupinus angustifolius]
XP_019441576.1+OIW12819.1	0.80148	0.91	1.10	2	PREDICTED: UPF0235 protein At5g63440 [Lupinus angustifolius] hypothetical protein TanjilG_24752 [Lupinus angustifolius]
XP_019438746.1+OIW19650.1	0.80182	0.98	1.02	2	PREDICTED: heparanase-like protein 1 isoform X1 [Lupinus angustifolius] hypothetical protein TanjilG_18460 [Lupinus angustifolius]
XP_019439335.1	0.80182	1.04	1.04	7	PREDICTED: eukaryotic initiation factor 4A-3-like [Lupinus angustifolius]
XP_019413362.1+XP_019451603.1	0.80182	0.89	1.12	2	PREDICTED: ATP-dependent Clp protease proteolytic subunit 2, mitochondrial-like [Lupinus angustifolius] PREDICTED: ATP-dependent Clp protease proteolytic subunit 2, mitochondrial-like [Lupinus angustifolius]
XP_019413605.1+XP_019413607.1	0.80182	0.97	1.04	7	PREDICTED: phospholipase A-2-activating protein-like isoform X1 [Lupinus angustifolius] PREDICTED: phospholipase A-2-activating protein-like isoform X2 [Lupinus angustifolius]
XP_019441217.1	0.80182	1.10	1.10	2	PREDICTED: shaggy-related protein kinase alpha [Lupinus angustifolius]
XP_019461750.1	0.80182	0.86	1.17	6	PREDICTED: uncharacterized protein LOC109360960 [Lupinus angustifolius]
XP_019452830.1+OIW06632.1	0.80182	1.04	1.04	3	PREDICTED: subtilisin-like protease SBT1.3 [Lupinus angustifolius] hypothetical protein TanjilG_04026 [Lupinus angustifolius]
XP_019425394.1+OIV92082.1	0.80182	0.98	1.02	4	PREDICTED: microtubule-associated protein TORTIFOLIA1-like [Lupinus angustifolius] hypothetical protein TanjilG_08755 [Lupinus angustifolius]
XP_019462098.1	0.80182	0.97	1.03	3	PREDICTED: protein disulfide isomerase-like 2-3 [Lupinus angustifolius]
XP_019437385.1	0.80182	0.98	1.02	3	PREDICTED: probable prolyl 4-hydroxylase 4 [Lupinus angustifolius]
XP_019458664.1+XP_019436202.1	0.80222	0.91	1.09	3	PREDICTED: probable protein arginine N-methyltransferase 1.2 [Lupinus angustifolius] PREDICTED: probable protein arginine N-methyltransferase 1 [Lupinus angustifolius]
XP_019441096.1	0.80222	0.97	1.03	3	PREDICTED: heterogeneous nuclear ribonucleoprotein 1-like [Lupinus angustifolius]
XP_019424422.1+XP_019422164.1+OIW10308.1+XP_019445971.1	0.80224	1.05	1.05	9	PREDICTED: AP-2 complex subunit mu [Lupinus angustifolius] PREDICTED: AP-2 complex subunit mu-like [Lupinus angustifolius] hypothetical protein TanjilG_28059 [Lupinus angustifolius] PREDICTED: AP-2 complex subunit mu-like [Lupinus angustifolius]
XP_019448057.1	0.80224	1.07	1.07	2	PREDICTED: uncharacterized protein LOC109351148 [Lupinus angustifolius]
XP_019424882.1+OIV92457.1+XP_019465051.1	0.80224	1.02	1.02	2	PREDICTED: pathogen-related protein-like [Lupinus angustifolius] hypothetical protein TanjilG_02220 [Lupinus angustifolius] PREDICTED: pathogen-related protein-like [Lupinus angustifolius]
XP_019417532.1+OIV96535.1+XP_019438367.1+XP_019438366.1	0.80224	0.94	1.07	5	PREDICTED: oligouridylate-binding protein 1-like [Lupinus angustifolius] hypothetical protein TanjilG_07927 [Lupinus angustifolius] PREDICTED: oligouridylate-binding protein 1-like isoform X2 [Lupinus angustifolius] PREDICTED: oligouridylate-binding protein 1-like isoform X1 [Lupinus angustifolius]
OIW06824.1+XP_019452564.1	0.80416	1.06	1.06	3	hypothetical protein TanjilG_03719 [Lupinus angustifolius] PREDICTED: beta-hexosaminidase 1-like [Lupinus angustifolius]
Q5H873.1+ABN48480.1	0.80442	1.05	1.05	10	RecName: Full=13-hydroxylupanine O-tigloyltransferase; AltName: Full=(-)-13alpha-hydroxymultiflorine/(+)-13alpha-hydroxylupanine O-tigloyltransferase; Short=HMT/HLTase; AltName: Full=Quinolizidine alkaloid O-tigloyltransferase quinolizidine alkaloid O-tigloyltransferase [Lupinus albus]
XP_019456998.1	0.80442	0.92	1.08	4	PREDICTED: transmembrane emp24 domain-containing protein p24beta2-like [Lupinus angustifolius]
OIW03057.1+XP_019458769.1	0.80442	0.93	1.08	6	hypothetical protein TanjilG_19337 [Lupinus angustifolius] PREDICTED: cytoplasmic 60S subunit biogenesis factor REI1 homolog 1-like [Lupinus angustifolius]
OIW18908.1+XP_019448435.1	0.80442	0.98	1.02	7	hypothetical protein TanjilG_25351 [Lupinus angustifolius] PREDICTED: UPF0160 protein-like [Lupinus angustifolius]
XP_019445931.1	0.80442	0.98	1.02	2	PREDICTED: ribulose-1,5 bisphosphate carboxylase/oxygenase large subunit N-methyltransferase, chloroplastic-like [Lupinus angustifolius]
XP_019454819.1	0.80442	0.95	1.05	2	PREDICTED: deoxyuridine 5'-triphosphate nucleotidohydrolase-like [Lupinus angustifolius]
XP_019432015.1	0.80588	0.99	1.01	3	PREDICTED: WD repeat-containing protein 26-like [Lupinus angustifolius]
XP_019425290.1	0.80588	0.90	1.11	4	PREDICTED: stromal 70 kDa heat shock-related protein, chloroplastic-like [Lupinus angustifolius]
XP_019463657.1	0.80588	1.01	1.01	5	PREDICTED: probable aspartyl aminopeptidase [Lupinus angustifolius]
OIV93414.1+XP_019424562.1	0.80733	0.98	1.02	2	hypothetical protein TanjilG_02951 [Lupinus angustifolius] PREDICTED: glycine cleavage system H protein, mitochondrial-like [Lupinus angustifolius]
XP_019447072.1+XP_019447076.1+XP_019447079.1+XP_019447077.1+OIW09520.1	0.80733	0.94	1.06	3	PREDICTED: titin-like isoform X1 [Lupinus angustifolius] PREDICTED: titin-like isoform X2 [Lupinus angustifolius] PREDICTED: titin-like isoform X4 [Lupinus angustifolius] PREDICTED: titin-like isoform X3 [Lupinus angustifolius] hypothetical protein TanjilG_11642 [Lupinus angustifolius]
XP_019433553.1	0.80733	1.00	1.00	2	PREDICTED: heat shock protein 90-5, chloroplastic-like [Lupinus angustifolius]
OIW09797.1+XP_019446690.1	0.80733	0.97	1.03	8	hypothetical protein TanjilG_32235 [Lupinus angustifolius] PREDICTED: uncharacterized protein LOC109350034 [Lupinus angustifolius]
XP_019412906.1+OIV99179.1+XP_019412909.1	0.80733	1.01	1.01	2	PREDICTED: 14-3-3-like protein D isoform X1 [Lupinus angustifolius] hypothetical protein TanjilG_19675 [Lupinus angustifolius] PREDICTED: 14-3-3-like protein D isoform X3 [Lupinus angustifolius]
XP_019454671.1+XP_019454669.1+XP_019454672.1+XP_019454670.1	0.80733	1.05	1.05	2	PREDICTED: single-stranded DNA-binding protein WHY1, chloroplastic-like isoform X3 [Lupinus angustifolius] PREDICTED: single-stranded DNA-binding protein WHY1, chloroplastic-like isoform X1 [Lupinus angustifolius] PREDICTED: single-stranded DNA-binding protein WHY1, chloroplastic-like isoform X4 [Lupinus angustifolius] PREDICTED: single-stranded DNA-binding protein WHY1, chloroplastic-like isofor…
XP_019459203.1	0.80733	1.08	1.08	2	PREDICTED: alcohol dehydrogenase-like 4 [Lupinus angustifolius]
XP_019457832.1	0.80753	1.08	1.08	4	PREDICTED: electron transfer flavoprotein-ubiquinone oxidoreductase, mitochondrial isoform X1 [Lupinus angustifolius]
XP_019417348.1+OIV96710.1	0.80753	1.07	1.07	5	PREDICTED: probable beta-D-xylosidase 7 isoform X1 [Lupinus angustifolius] hypothetical protein TanjilG_09252 [Lupinus angustifolius]
XP_019430093.1	0.80753	1.14	1.14	5	PREDICTED: alpha-xylosidase 1-like [Lupinus angustifolius]
XP_019428756.1+XP_019428747.1	0.80753	0.98	1.02	2	PREDICTED: serine/threonine-protein kinase dst1 isoform X2 [Lupinus angustifolius] PREDICTED: serine/threonine-protein kinase dst1 isoform X1 [Lupinus angustifolius]
OIW14166.1+XP_019439483.1	0.80753	0.92	1.08	2	hypothetical protein TanjilG_21306 [Lupinus angustifolius] PREDICTED: glutathione S-transferase DHAR3, chloroplastic-like [Lupinus angustifolius]
XP_019417569.1	0.80813	0.96	1.04	4	PREDICTED: stomatin-like protein 2, mitochondrial [Lupinus angustifolius]
XP_019440828.1	0.80813	0.95	1.05	2	PREDICTED: UBP1-associated protein 2C-like [Lupinus angustifolius]
XP_019453538.1+OIW06052.1	0.80813	1.10	1.10	3	PREDICTED: endogenous alpha-amylase/subtilisin inhibitor-like [Lupinus angustifolius] hypothetical protein TanjilG_29808 [Lupinus angustifolius]
XP_019443530.1	0.80813	1.01	1.01	7	PREDICTED: uncharacterized protein LOC109347880 [Lupinus angustifolius]
OIW05586.1+XP_019454334.1	0.80813	0.89	1.13	2	hypothetical protein TanjilG_23372 [Lupinus angustifolius] PREDICTED: serine/threonine-protein phosphatase 4 regulatory subunit 2 [Lupinus angustifolius]
XP_019445584.1+XP_019445585.1	0.80834	1.04	1.04	2	PREDICTED: beta-ureidopropionase-like isoform X1 [Lupinus angustifolius] PREDICTED: beta-ureidopropionase-like isoform X2 [Lupinus angustifolius]
XP_019444746.1	0.80834	0.94	1.06	3	PREDICTED: NEDD8-conjugating enzyme Ubc12-like [Lupinus angustifolius]
XP_019440006.1+XP_019419186.1+XP_019419185.1+OIV96054.1	0.80875	0.98	1.02	2	PREDICTED: SNF1-related protein kinase regulatory subunit beta-2 [Lupinus angustifolius] PREDICTED: SNF1-related protein kinase regulatory subunit beta-2-like isoform X2 [Lupinus angustifolius] PREDICTED: SNF1-related protein kinase regulatory subunit beta-2-like isoform X1 [Lupinus angustifolius] hypothetical protein TanjilG_27158 [Lupinus angustifolius]
OIW21837.1+XP_019433982.1	0.80875	1.00	1.00	2	hypothetical protein TanjilG_12946 [Lupinus angustifolius] PREDICTED: isoamylase 3, chloroplastic [Lupinus angustifolius]
OIW10445.1+XP_019445549.1	0.80875	1.03	1.03	4	hypothetical protein TanjilG_00383 [Lupinus angustifolius] PREDICTED: bifunctional riboflavin biosynthesis protein RIBA 1, chloroplastic-like [Lupinus angustifolius]
XP_019414744.1	0.80875	0.99	1.01	3	PREDICTED: probable pectate lyase 5 [Lupinus angustifolius]
XP_019427849.1	0.80890	0.84	1.20	4	PREDICTED: universal stress protein A-like protein [Lupinus angustifolius]
XP_019462799.1	0.80890	0.89	1.13	4	PREDICTED: outer envelope pore protein 16-2, chloroplastic [Lupinus angustifolius]
XP_019450983.1+OIW08755.1	0.80994	1.05	1.05	5	PREDICTED: E3 ubiquitin-protein ligase UPL3-like [Lupinus angustifolius] hypothetical protein TanjilG_03431 [Lupinus angustifolius]
XP_019453074.1+XP_019453076.1+OIW06475.1+XP_019453075.1	0.80994	0.94	1.07	2	PREDICTED: CCR4-NOT transcription complex subunit 3-like isoform X1 [Lupinus angustifolius] PREDICTED: CCR4-NOT transcription complex subunit 3-like isoform X3 [Lupinus angustifolius] hypothetical protein TanjilG_05246 [Lupinus angustifolius] PREDICTED: CCR4-NOT transcription complex subunit 3-like isoform X2 [Lupinus angustifolius]
OIV92218.1+XP_019425684.1	0.81026	0.94	1.07	4	hypothetical protein TanjilG_31137 [Lupinus angustifolius] PREDICTED: protein CIA1-like [Lupinus angustifolius]
OIV95553.1+XP_019420071.1	0.81026	1.04	1.04	7	hypothetical protein TanjilG_02908 [Lupinus angustifolius] PREDICTED: peptidyl-prolyl cis-trans isomerase CYP20-1 isoform X1 [Lupinus angustifolius]
OIW17065.1+XP_019425931.1	0.81026	0.96	1.04	3	hypothetical protein TanjilG_15648 [Lupinus angustifolius] PREDICTED: ATP-dependent zinc metalloprotease FTSH 11, chloroplastic/mitochondrial [Lupinus angustifolius]
OIV94205.1+XP_019420287.1	0.81357	0.84	1.19	3	hypothetical protein TanjilG_28144 [Lupinus angustifolius] PREDICTED: zinc finger protein ZPR1-like [Lupinus angustifolius]
XP_019426260.1	0.81402	1.02	1.02	4	PREDICTED: aspartic proteinase-like [Lupinus angustifolius]
XP_019417806.1+XP_019417808.1	0.81402	0.98	1.02	5	PREDICTED: ultraviolet-B receptor UVR8-like isoform X1 [Lupinus angustifolius] PREDICTED: ultraviolet-B receptor UVR8-like isoform X2 [Lupinus angustifolius]
XP_019424460.1	0.81402	0.93	1.07	7	PREDICTED: probable calcium-binding protein CML13 [Lupinus angustifolius]
XP_019447334.1+OIW09457.1	0.81402	0.93	1.08	3	PREDICTED: kinesin-like protein KIN-4A [Lupinus angustifolius] hypothetical protein TanjilG_22731 [Lupinus angustifolius]
XP_019440877.1+OIW13288.1	0.81402	0.82	1.21	2	PREDICTED: serrate RNA effector molecule-like [Lupinus angustifolius] hypothetical protein TanjilG_25767 [Lupinus angustifolius]
XP_019414166.1	0.81402	0.93	1.08	2	PREDICTED: dnaJ homolog subfamily B member 13-like [Lupinus angustifolius]
XP_019445780.1+XP_019424142.1+XP_019424143.1	0.81428	0.95	1.05	2	PREDICTED: pentatricopeptide repeat-containing protein At2g15690-like [Lupinus angustifolius] PREDICTED: pentatricopeptide repeat-containing protein At2g15690-like isoform X1 [Lupinus angustifolius] PREDICTED: pentatricopeptide repeat-containing protein At2g15690-like isoform X2 [Lupinus angustifolius]
XP_019423140.1+XP_019422269.1	0.81428	0.97	1.03	3	PREDICTED: ras-related protein RABH1b [Lupinus angustifolius] PREDICTED: ras-related protein RABH1b-like [Lupinus angustifolius]
XP_019428565.1	0.81428	1.04	1.04	2	PREDICTED: zeta-carotene desaturase, chloroplastic/chromoplastic-like [Lupinus angustifolius]
XP_019453564.1	0.81428	0.97	1.03	4	PREDICTED: UBP1-associated protein 2C-like isoform X1 [Lupinus angustifolius]
XP_019423611.1	0.81428	1.00	1.00	2	PREDICTED: probable acyl-activating enzyme 1, peroxisomal [Lupinus angustifolius]
XP_019424269.1	0.81428	0.96	1.04	2	PREDICTED: hexokinase-1-like [Lupinus angustifolius]
XP_019446678.1	0.81560	0.93	1.07	9	PREDICTED: FAM10 family protein At4g22670 [Lupinus angustifolius]
XP_019434975.1	0.81560	0.94	1.06	5	PREDICTED: 1-aminocyclopropane-1-carboxylate oxidase homolog 4-like [Lupinus angustifolius]
XP_019463012.1	0.81560	0.94	1.07	2	PREDICTED: calnexin homolog [Lupinus angustifolius]
XP_019458629.1	0.81588	0.91	1.10	2	PREDICTED: beta-glucosidase 44-like [Lupinus angustifolius]
XP_019438300.1	0.81588	1.01	1.01	6	PREDICTED: malate dehydrogenase, chloroplastic-like [Lupinus angustifolius]
XP_019458072.1	0.81629	0.93	1.07	2	PREDICTED: UPF0587 protein C1orf123 homolog [Lupinus angustifolius]
XP_019422560.1	0.81629	0.95	1.05	3	PREDICTED: transport and Golgi organization 2 homolog isoform X1 [Lupinus angustifolius]
OIW04289.1	0.81855	0.97	1.03	15	hypothetical protein TanjilG_00849 [Lupinus angustifolius]
XP_019453794.1	0.81855	0.94	1.06	2	PREDICTED: B-cell receptor-associated protein 31-like [Lupinus angustifolius]
XP_019420201.1	0.82079	0.89	1.12	3	PREDICTED: caffeoyl-CoA O-methyltransferase-like [Lupinus angustifolius]
XP_019429569.1+XP_019429566.1+XP_019429570.1+XP_019429568.1+XP_019429567.1+XP_019429563.1+XP_019430829.1+OIV89963.1+XP_019430830.1+OIW20332.1	0.82079	0.95	1.05	2	PREDICTED: clathrin interactor EPSIN 3-like isoform X5 [Lupinus angustifolius] PREDICTED: clathrin interactor EPSIN 3-like isoform X2 [Lupinus angustifolius] PREDICTED: clathrin interactor EPSIN 3-like isoform X6 [Lupinus angustifolius] PREDICTED: clathrin interactor EPSIN 3-like isoform X4 [Lupinus angustifolius] PREDICTED: clathrin interactor EPSIN 3-like isoform X3 [Lupinus angustifolius] PRED…
XP_019434979.1+XP_019424438.1+XP_019422224.1	0.82108	1.03	1.03	3	PREDICTED: 40S ribosomal protein S15-1 [Lupinus angustifolius] PREDICTED: 40S ribosomal protein S15-4-like [Lupinus angustifolius] PREDICTED: 40S ribosomal protein S15-1-like [Lupinus angustifolius]
XP_019435232.1	0.82108	0.97	1.04	2	PREDICTED: alpha,alpha-trehalose-phosphate synthase [UDP-forming] 5-like [Lupinus angustifolius]
XP_019414995.1+XP_019414996.1	0.82108	0.86	1.16	2	PREDICTED: epidermal growth factor receptor substrate 15-like 1 isoform X1 [Lupinus angustifolius] PREDICTED: epidermal growth factor receptor substrate 15-like 1 isoform X2 [Lupinus angustifolius]
XP_019418705.1	0.82108	1.09	1.09	4	PREDICTED: exocyst complex component SEC10-like [Lupinus angustifolius]
XP_019442905.1	0.82108	0.97	1.03	3	PREDICTED: cytochrome b-c1 complex subunit Rieske-4, mitochondrial-like isoform X1 [Lupinus angustifolius]
XP_019452520.1+XP_019452519.1+XP_019452518.1	0.82108	0.93	1.07	5	PREDICTED: extensin-2-like isoform X3 [Lupinus angustifolius] PREDICTED: extensin-2-like isoform X2 [Lupinus angustifolius] PREDICTED: extensin-2-like isoform X1 [Lupinus angustifolius]
XP_019463872.1	0.82111	0.93	1.07	2	PREDICTED: uncharacterized protein LOC109362499 [Lupinus angustifolius]
XP_019447462.1+OIW09393.1	0.82111	0.97	1.03	6	PREDICTED: heat shock 70 kDa protein 17-like [Lupinus angustifolius] hypothetical protein TanjilG_20990 [Lupinus angustifolius]
Q7Y1W5.1+Q7XZT8.1	0.82111	0.97	1.03	2	RecName: Full=Class 10 plant pathogenesis-related protein 2E; Short=Llpr10.2e; Short=Ypr-10.2e; AltName: Allergen=Lup l 4 RecName: Full=Class 10 plant pathogenesis-related protein 2F; Short=Llpr10.2f; Short=Ypr-10.2f; AltName: Allergen=Lup l 4
OIW19324.1+XP_019443675.1	0.82111	1.04	1.04	6	hypothetical protein TanjilG_26023 [Lupinus angustifolius] PREDICTED: conserved oligomeric Golgi complex subunit 3 [Lupinus angustifolius]
XP_019421468.1+XP_019421494.1	0.82173	0.97	1.03	2	PREDICTED: RNA-binding protein BRN1-like isoform X1 [Lupinus angustifolius] PREDICTED: RNA-binding protein BRN1-like isoform X2 [Lupinus angustifolius]
OIV89222.1+OIV89220.1+OIV89221.1	0.82173	1.05	1.05	2	hypothetical protein TanjilG_24404 [Lupinus angustifolius] hypothetical protein TanjilG_24402 [Lupinus angustifolius] hypothetical protein TanjilG_24403 [Lupinus angustifolius]
OIW18722.1+XP_019454979.1+XP_019454972.1+XP_019454965.1	0.82173	0.87	1.15	2	hypothetical protein TanjilG_13474 [Lupinus angustifolius] PREDICTED: nucleosome assembly protein 1;2-like isoform X5 [Lupinus angustifolius] PREDICTED: nucleosome assembly protein 1;2-like isoform X4 [Lupinus angustifolius] PREDICTED: nucleosome assembly protein 1;2-like isoform X3 [Lupinus angustifolius]
XP_019422572.1	0.82173	1.01	1.01	2	PREDICTED: serine racemase [Lupinus angustifolius]
XP_019445501.1	0.82173	1.01	1.01	11	PREDICTED: adenosylhomocysteinase-like [Lupinus angustifolius]
XP_019415793.1	0.82231	1.04	1.04	7	PREDICTED: AP-4 complex subunit mu-like [Lupinus angustifolius]
XP_019419419.1+XP_019419417.1	0.82231	1.03	1.03	2	PREDICTED: FACT complex subunit SPT16-like isoform X3 [Lupinus angustifolius] PREDICTED: FACT complex subunit SPT16-like isoform X1 [Lupinus angustifolius]
XP_019419001.1	0.82231	1.10	1.10	3	PREDICTED: GDSL esterase/lipase LTL1-like [Lupinus angustifolius]
XP_019424661.1+OIW17176.1	0.82238	1.08	1.08	3	PREDICTED: beta-galactosidase 1-like [Lupinus angustifolius] hypothetical protein TanjilG_18131 [Lupinus angustifolius]
XP_019420450.1	0.82238	0.95	1.05	2	PREDICTED: caffeoyl-CoA O-methyltransferase-like [Lupinus angustifolius]
XP_019437457.1+OIW15212.1+XP_019437456.1	0.82238	0.98	1.02	2	PREDICTED: nuclear poly(A) polymerase 1-like isoform X2 [Lupinus angustifolius] hypothetical protein TanjilG_08804 [Lupinus angustifolius] PREDICTED: nuclear poly(A) polymerase 1-like isoform X1 [Lupinus angustifolius]
XP_019440576.1+OIW13576.1	0.82265	0.98	1.02	3	PREDICTED: F-actin-capping protein subunit alpha [Lupinus angustifolius] hypothetical protein TanjilG_29317 [Lupinus angustifolius]
XP_019446022.1+XP_019446016.1+XP_019446017.1+XP_019446021.1+XP_019446023.1+XP_019446020.1+XP_019446018.1+XP_019446019.1	0.82265	1.01	1.01	8	PREDICTED: poly(U)-specific endoribonuclease-B-like isoform X7 [Lupinus angustifolius] PREDICTED: poly(U)-specific endoribonuclease-B-like isoform X1 [Lupinus angustifolius] PREDICTED: poly(U)-specific endoribonuclease-B-like isoform X2 [Lupinus angustifolius] PREDICTED: poly(U)-specific endoribonuclease-B-like isoform X6 [Lupinus angustifolius] PREDICTED: poly(U)-specific endoribonuclease-B-like…
XP_019421473.1	0.82265	0.95	1.06	5	PREDICTED: mediator of RNA polymerase II transcription subunit 37f-like [Lupinus angustifolius]
XP_019427818.1+XP_019427817.1+XP_019427821.1+XP_019427822.1+XP_019427820.1+OIV90269.1+XP_019427819.1+XP_019427824.1	0.82265	0.94	1.06	2	PREDICTED: inositol hexakisphosphate and diphosphoinositol-pentakisphosphate kinase 1-like isoform X2 [Lupinus angustifolius] PREDICTED: inositol hexakisphosphate and diphosphoinositol-pentakisphosphate kinase 1-like isoform X1 [Lupinus angustifolius] PREDICTED: inositol hexakisphosphate and diphosphoinositol-pentakisphosphate kinase 1-like isoform X5 [Lupinus angustifolius] PREDICTED: inositol h…
XP_019447003.1+OIW09533.1	0.82265	1.04	1.04	4	PREDICTED: asparagine synthetase [glutamine-hydrolyzing] 2-like [Lupinus angustifolius] hypothetical protein TanjilG_30852 [Lupinus angustifolius]
XP_019449213.1	0.82299	1.03	1.03	19	PREDICTED: valine--tRNA ligase, mitochondrial 1 isoform X2 [Lupinus angustifolius]
XP_019419004.1+OIV95683.1	0.82299	0.96	1.04	2	PREDICTED: protein TIC 40, chloroplastic-like [Lupinus angustifolius] hypothetical protein TanjilG_01477 [Lupinus angustifolius]
OIV89949.1+XP_019429794.1	0.82299	1.01	1.01	3	hypothetical protein TanjilG_24448 [Lupinus angustifolius] PREDICTED: uncharacterized protein LOC109337303 [Lupinus angustifolius]
OIW03862.1+XP_019457714.1	0.82329	1.03	1.03	3	hypothetical protein TanjilG_30138 [Lupinus angustifolius] PREDICTED: PTI1-like tyrosine-protein kinase At3g15890 [Lupinus angustifolius]
XP_019456109.1	0.82329	0.99	1.01	2	PREDICTED: putative calcium-transporting ATPase 11, plasma membrane-type [Lupinus angustifolius]
XP_019425889.1	0.82329	0.95	1.06	4	PREDICTED: probable protein phosphatase 2C 76 [Lupinus angustifolius]
XP_019423744.1+XP_019423743.1	0.82329	0.98	1.02	10	PREDICTED: uncharacterized protein LOC109332991 isoform X2 [Lupinus angustifolius] PREDICTED: uncharacterized protein LOC109332991 isoform X1 [Lupinus angustifolius]
XP_019438305.1	0.82354	1.06	1.06	2	PREDICTED: REF/SRPP-like protein At1g67360 [Lupinus angustifolius]
XP_019438236.1	0.82354	0.97	1.03	3	PREDICTED: WD-40 repeat-containing protein MSI2-like [Lupinus angustifolius]
XP_019455538.1	0.82354	1.00	1.00	9	PREDICTED: alanine aminotransferase 2, mitochondrial-like [Lupinus angustifolius]
OIW19670.1+XP_019438950.1	0.82383	0.95	1.06	3	hypothetical protein TanjilG_18480 [Lupinus angustifolius] PREDICTED: ABC transporter B family member 25 [Lupinus angustifolius]
XP_019461633.1	0.82383	1.01	1.01	8	PREDICTED: probable fructokinase-6, chloroplastic [Lupinus angustifolius]
XP_019415724.1	0.82383	1.03	1.03	3	PREDICTED: protein arginine N-methyltransferase 1.5-like [Lupinus angustifolius]
XP_019416843.1	0.82383	0.96	1.04	4	PREDICTED: ubiquitin-like modifier-activating enzyme 5 [Lupinus angustifolius]
XP_019433457.1	0.82688	1.12	1.12	5	PREDICTED: ABC transporter C family member 14-like isoform X1 [Lupinus angustifolius]
XP_019458020.1	0.82835	0.96	1.04	3	PREDICTED: glucose-6-phosphate 1-dehydrogenase, cytoplasmic isoform [Lupinus angustifolius]
OIW21228.1+XP_019432563.1	0.82835	0.94	1.06	2	hypothetical protein TanjilG_31096 [Lupinus angustifolius] PREDICTED: pre-mRNA-processing factor 19-like [Lupinus angustifolius]
XP_019436252.1	0.82835	1.04	1.04	2	PREDICTED: carbamoyl-phosphate synthase large chain, chloroplastic-like [Lupinus angustifolius]
OIV91779.1+XP_019425308.1	0.82835	1.06	1.06	6	hypothetical protein TanjilG_14358 [Lupinus angustifolius] PREDICTED: phytochrome B-like [Lupinus angustifolius]
XP_019463673.1	0.82835	0.95	1.05	4	PREDICTED: BTB/POZ domain-containing protein At3g09030 [Lupinus angustifolius]
XP_019449558.1+OIW07955.1	0.82900	0.91	1.10	3	PREDICTED: protein LTV1 homolog isoform X1 [Lupinus angustifolius] hypothetical protein TanjilG_20056 [Lupinus angustifolius]
XP_019452771.1	0.82900	1.05	1.05	2	PREDICTED: acidic endochitinase-like [Lupinus angustifolius]
XP_019446466.1+OIW09893.1	0.82953	1.02	1.02	7	PREDICTED: uncharacterized protein LOC109349882 [Lupinus angustifolius] hypothetical protein TanjilG_32042 [Lupinus angustifolius]
XP_019432305.1+XP_019439445.1+XP_019432304.1	0.82953	1.06	1.06	7	PREDICTED: ARF guanine-nucleotide exchange factor GNOM-like isoform X2 [Lupinus angustifolius] PREDICTED: ARF guanine-nucleotide exchange factor GNOM-like [Lupinus angustifolius] PREDICTED: ARF guanine-nucleotide exchange factor GNOM-like isoform X1 [Lupinus angustifolius]
XP_019464068.1	0.82953	0.89	1.13	3	PREDICTED: tetratricopeptide repeat protein 1-like [Lupinus angustifolius]
XP_019428945.1	0.83162	1.04	1.04	4	PREDICTED: eukaryotic translation initiation factor 3 subunit C-like [Lupinus angustifolius]
XP_019439823.1+XP_019439824.1+XP_019439827.1+XP_019439825.1+XP_019439822.1+XP_019439826.1	0.83162	1.00	1.00	3	PREDICTED: starch synthase 3, chloroplastic/amyloplastic-like isoform X2 [Lupinus angustifolius] PREDICTED: starch synthase 3, chloroplastic/amyloplastic-like isoform X3 [Lupinus angustifolius] PREDICTED: starch synthase 3, chloroplastic/amyloplastic-like isoform X6 [Lupinus angustifolius] PREDICTED: starch synthase 3, chloroplastic/amyloplastic-like isoform X4 [Lupinus angustifolius] PREDICTED: …
OIV97529.1+XP_019414777.1+XP_019414776.1	0.83279	1.12	1.12	9	hypothetical protein TanjilG_12286 [Lupinus angustifolius] PREDICTED: exportin-7 isoform X2 [Lupinus angustifolius] PREDICTED: exportin-7 isoform X1 [Lupinus angustifolius]
XP_019419852.1+XP_019419851.1+XP_019419853.1	0.83279	1.04	1.04	3	PREDICTED: SAP30-binding protein-like isoform X2 [Lupinus angustifolius] PREDICTED: SAP30-binding protein-like isoform X1 [Lupinus angustifolius] PREDICTED: SAP30-binding protein-like isoform X3 [Lupinus angustifolius]
XP_019448688.1	0.83279	1.07	1.07	2	PREDICTED: mitogen-activated protein kinase 3-like [Lupinus angustifolius]
XP_019436766.1	0.83394	1.08	1.08	2	PREDICTED: DNA polymerase epsilon subunit B [Lupinus angustifolius]
XP_019438424.1+OIW14585.1	0.83394	0.91	1.10	2	PREDICTED: ultraviolet-B receptor UVR8 [Lupinus angustifolius] hypothetical protein TanjilG_32927 [Lupinus angustifolius]
XP_019432809.1	0.83394	1.03	1.03	2	PREDICTED: probable carboxylesterase 120 [Lupinus angustifolius]
XP_019445419.1	0.83601	1.00	1.00	3	PREDICTED: 60S ribosomal protein L27a-3-like [Lupinus angustifolius]
XP_019431041.1	0.83601	0.89	1.12	5	PREDICTED: prohibitin-3, mitochondrial-like [Lupinus angustifolius]
XP_019419602.1+OIV95715.1	0.83624	1.06	1.06	2	PREDICTED: nicastrin [Lupinus angustifolius] hypothetical protein TanjilG_01509 [Lupinus angustifolius]
XP_019462148.1	0.83624	0.95	1.05	2	PREDICTED: uncharacterized protein LOC109361223 [Lupinus angustifolius]
OIW19616.1+XP_019438056.1	0.83624	0.96	1.04	7	hypothetical protein TanjilG_18426 [Lupinus angustifolius] PREDICTED: delta-1-pyrroline-5-carboxylate dehydrogenase 12A1, mitochondrial-like [Lupinus angustifolius]
XP_019459236.1+XP_019459237.1+OIW01891.1+XP_019459235.1	0.83624	0.97	1.03	6	PREDICTED: uncharacterized protein LOC109359143 isoform X2 [Lupinus angustifolius] PREDICTED: uncharacterized protein LOC109359143 isoform X3 [Lupinus angustifolius] hypothetical protein TanjilG_31073 [Lupinus angustifolius] PREDICTED: uncharacterized protein LOC109359143 isoform X1 [Lupinus angustifolius]
XP_019425865.1	0.83646	0.96	1.04	6	PREDICTED: ADP-ribosylation factor GTPase-activating protein AGD7-like [Lupinus angustifolius]
XP_019438806.1+OIW14365.1	0.83646	1.06	1.06	3	PREDICTED: uncharacterized protein LOC109344452 [Lupinus angustifolius] hypothetical protein TanjilG_15719 [Lupinus angustifolius]
XP_019444145.1	0.83646	1.07	1.07	9	PREDICTED: eukaryotic translation initiation factor 3 subunit C-like [Lupinus angustifolius]
XP_019437248.1	0.83646	1.07	1.07	16	PREDICTED: coatomer subunit alpha-2-like [Lupinus angustifolius]
XP_019439854.1	0.83669	0.94	1.06	2	PREDICTED: deSI-like protein At4g17486 [Lupinus angustifolius]
XP_019435303.1	0.83669	0.98	1.02	13	PREDICTED: peptidyl-prolyl cis-trans isomerase CYP71 [Lupinus angustifolius]
XP_019417333.1	0.83669	0.97	1.03	3	PREDICTED: alpha-1,3-mannosyl-glycoprotein 2-beta-N-acetylglucosaminyltransferase [Lupinus angustifolius]
XP_019463457.1+OIV99809.1	0.83669	0.98	1.02	3	PREDICTED: FGGY carbohydrate kinase domain-containing protein [Lupinus angustifolius] hypothetical protein TanjilG_26147 [Lupinus angustifolius]
XP_019439518.1+OIW14139.1	0.83871	0.98	1.02	3	PREDICTED: uncharacterized protein LOC109345153 [Lupinus angustifolius] hypothetical protein TanjilG_21279 [Lupinus angustifolius]
AAN87551.1+OIW17200.1+XP_019423751.1	0.83871	0.93	1.07	7	gamma-tubulin [Lupinus albus] hypothetical protein TanjilG_02489 [Lupinus angustifolius] PREDICTED: tubulin gamma-2 chain [Lupinus angustifolius]
XP_019464818.1	0.83956	0.98	1.02	3	PREDICTED: delta-1-pyrroline-5-carboxylate synthase-like [Lupinus angustifolius]
XP_019420888.1+XP_019444843.1+XP_019444841.1	0.83956	0.93	1.08	9	PREDICTED: LOW QUALITY PROTEIN: 26S proteasome non-ATPase regulatory subunit 4 homolog [Lupinus angustifolius] PREDICTED: 26S proteasome non-ATPase regulatory subunit 4 homolog isoform X2 [Lupinus angustifolius] PREDICTED: 26S proteasome non-ATPase regulatory subunit 4 homolog isoform X1 [Lupinus angustifolius]
OIW08780.1+XP_019450856.1	0.83956	0.98	1.02	6	hypothetical protein TanjilG_16361 [Lupinus angustifolius] PREDICTED: probable glycerol-3-phosphate dehydrogenase [NAD(+)] 1, cytosolic [Lupinus angustifolius]
OIW04884.1+XP_019455441.1+XP_019455442.1	0.83956	1.00	1.00	5	hypothetical protein TanjilG_24000 [Lupinus angustifolius] PREDICTED: coatomer subunit beta'-2-like isoform X1 [Lupinus angustifolius] PREDICTED: coatomer subunit beta'-2-like isoform X2 [Lupinus angustifolius]
XP_019428362.1+XP_019432748.1+XP_019432747.1+XP_019428360.1	0.83956	1.00	1.00	2	PREDICTED: casein kinase 1-like protein 10 isoform X2 [Lupinus angustifolius] PREDICTED: casein kinase 1-like protein 10 isoform X2 [Lupinus angustifolius] PREDICTED: casein kinase 1-like protein 10 isoform X1 [Lupinus angustifolius] PREDICTED: casein kinase 1-like protein 10 isoform X1 [Lupinus angustifolius]
OIW12846.1+XP_019441528.1	0.83956	1.00	1.00	2	hypothetical protein TanjilG_24779 [Lupinus angustifolius] PREDICTED: pre-mRNA-processing protein 40A-like [Lupinus angustifolius]
XP_019464006.1+OIW00564.1+XP_019464005.1	0.83976	0.88	1.13	2	PREDICTED: transmembrane 9 superfamily member 1-like isoform X2 [Lupinus angustifolius] hypothetical protein TanjilG_24294 [Lupinus angustifolius] PREDICTED: transmembrane 9 superfamily member 1-like isoform X1 [Lupinus angustifolius]
OIW06605.1	0.83976	0.99	1.01	7	hypothetical protein TanjilG_03999 [Lupinus angustifolius]
XP_019452378.1+XP_019452379.1	0.83976	1.04	1.04	4	PREDICTED: dihydrofolate synthetase isoform X1 [Lupinus angustifolius] PREDICTED: dihydrofolate synthetase isoform X2 [Lupinus angustifolius]
OIV97459.1+XP_019416673.1	0.83976	1.06	1.06	3	hypothetical protein TanjilG_10983 [Lupinus angustifolius] PREDICTED: 3'-hydroxy-N-methyl-(S)-coclaurine 4'-O-methyltransferase 2-like [Lupinus angustifolius]
XP_019417276.1+XP_019430975.1+XP_019437305.1+XP_019437306.1+XP_019437308.1	0.83983	0.92	1.08	4	PREDICTED: nascent polypeptide-associated complex subunit alpha-like protein 2 [Lupinus angustifolius] PREDICTED: nascent polypeptide-associated complex subunit alpha-like protein 2 [Lupinus angustifolius] PREDICTED: nascent polypeptide-associated complex subunit alpha-like protein 2 isoform X2 [Lupinus angustifolius] PREDICTED: nascent polypeptide-associated complex subunit alpha-like protein 2 …
XP_019443778.1	0.83983	0.91	1.10	5	PREDICTED: probable glutathione S-transferase [Lupinus angustifolius]
XP_019464253.1	0.83983	0.94	1.06	14	PREDICTED: eukaryotic translation initiation factor 3 subunit I-like isoform X1 [Lupinus angustifolius]
OIW04881.1+XP_019455359.1+XP_019455356.1	0.84085	0.88	1.13	3	hypothetical protein TanjilG_23997 [Lupinus angustifolius] PREDICTED: heat shock 70 kDa protein 15-like isoform X4 [Lupinus angustifolius] PREDICTED: heat shock 70 kDa protein 15-like isoform X1 [Lupinus angustifolius]
XP_019436931.1	0.84085	1.07	1.07	8	PREDICTED: low-temperature-induced cysteine proteinase-like [Lupinus angustifolius]
YP_009127582.1	0.84085	0.97	1.03	2	hypothetical chloroplast RF19 (chloroplast) [Lupinus albus]
XP_019463522.1	0.84094	1.08	1.08	2	PREDICTED: brefeldin A-inhibited guanine nucleotide-exchange protein 2-like [Lupinus angustifolius]
XP_019444574.1	0.84094	0.97	1.03	3	PREDICTED: protein CDC73 homolog [Lupinus angustifolius]
XP_019457463.1	0.84094	1.01	1.01	18	PREDICTED: programmed cell death protein 4-like [Lupinus angustifolius]
XP_019456385.1+XP_019456384.1+XP_019426934.1+OIW16982.1	0.84114	0.91	1.10	2	PREDICTED: mannosyl-oligosaccharide 1,2-alpha-mannosidase MNS1-like isoform X2 [Lupinus angustifolius] PREDICTED: mannosyl-oligosaccharide 1,2-alpha-mannosidase MNS1-like isoform X1 [Lupinus angustifolius] PREDICTED: mannosyl-oligosaccharide 1,2-alpha-mannosidase MNS1-like [Lupinus angustifolius] hypothetical protein TanjilG_32849 [Lupinus angustifolius]
OIW18584.1+XP_019452530.1	0.84114	1.16	1.16	2	hypothetical protein TanjilG_13336 [Lupinus angustifolius] PREDICTED: blue copper protein-like [Lupinus angustifolius]
OIW18682.1+XP_019454357.1	0.84114	1.12	1.12	2	hypothetical protein TanjilG_13434 [Lupinus angustifolius] PREDICTED: NADPH--cytochrome P450 reductase-like [Lupinus angustifolius]
XP_019428366.1	0.84114	1.03	1.03	4	PREDICTED: proline--tRNA ligase, chloroplastic/mitochondrial [Lupinus angustifolius]
XP_019436676.1	0.84193	0.70	1.42	3	PREDICTED: glycine-rich cell wall structural protein 1.8-like [Lupinus angustifolius]
OIV98061.1	0.84193	0.91	1.10	3	hypothetical protein TanjilG_09554 [Lupinus angustifolius]
XP_019461259.1	0.84193	0.94	1.07	4	PREDICTED: UDP-glucose 6-dehydrogenase 1 [Lupinus angustifolius]
XP_019435077.1+XP_019435075.1+XP_019435074.1	0.84213	0.95	1.05	2	PREDICTED: protein SRC2-like isoform X3 [Lupinus angustifolius] PREDICTED: protein SRC2-like isoform X2 [Lupinus angustifolius] PREDICTED: protein SRC2-like isoform X1 [Lupinus angustifolius]
XP_019413132.1	0.84213	0.87	1.15	3	PREDICTED: probable carboxylesterase 15 [Lupinus angustifolius]
XP_019444823.1	0.84213	0.94	1.07	4	PREDICTED: 3-dehydroquinate synthase, chloroplastic-like [Lupinus angustifolius]
XP_019413005.1+XP_019413004.1+XP_019450855.1+XP_019450854.1+XP_019412998.1+XP_019450852.1+XP_019413003.1	0.84213	0.90	1.11	3	PREDICTED: zinc finger CCCH domain-containing protein 53-like isoform X4 [Lupinus angustifolius] PREDICTED: zinc finger CCCH domain-containing protein 53-like isoform X3 [Lupinus angustifolius] PREDICTED: zinc finger CCCH domain-containing protein 53-like isoform X3 [Lupinus angustifolius] PREDICTED: zinc finger CCCH domain-containing protein 53-like isoform X2 [Lupinus angustifolius] PREDICTED: …
XP_019457791.1	0.84232	1.00	1.00	2	PREDICTED: ubiquitin carboxyl-terminal hydrolase 26-like [Lupinus angustifolius]
XP_019446145.1	0.84232	0.94	1.06	4	PREDICTED: probable calcium-binding protein CML27 [Lupinus angustifolius]
XP_019462588.1	0.84232	1.03	1.03	2	PREDICTED: putative methyltransferase At1g22800 [Lupinus angustifolius]
XP_019449436.1	0.84232	0.94	1.07	4	PREDICTED: enolase-like [Lupinus angustifolius]
XP_019458531.1	0.84308	0.98	1.02	2	PREDICTED: BTB/POZ and MATH domain-containing protein 4 [Lupinus angustifolius]
XP_019427577.1	0.84308	0.96	1.04	3	PREDICTED: DEAD-box ATP-dependent RNA helicase 3, chloroplastic-like [Lupinus angustifolius]
BAC77065.1	0.84308	1.03	1.03	8	NADP-specific isocitrate dehydrogenase [Lupinus albus]
XP_019425935.1	0.84308	1.04	1.04	5	PREDICTED: adenylosuccinate synthetase 2, chloroplastic [Lupinus angustifolius]
XP_019446295.1+XP_019446305.1	0.84308	1.00	1.00	6	PREDICTED: pyruvate dehydrogenase E1 component subunit beta-3, chloroplastic-like isoform X1 [Lupinus angustifolius] PREDICTED: pyruvate dehydrogenase E1 component subunit beta-3, chloroplastic-like isoform X2 [Lupinus angustifolius]
XP_019413599.1	0.84308	1.02	1.02	2	PREDICTED: probable methyltransferase PMT8 [Lupinus angustifolius]
XP_019428420.1	0.84308	1.06	1.06	5	PREDICTED: L-galactono-1,4-lactone dehydrogenase, mitochondrial [Lupinus angustifolius]
XP_019433779.1	0.84308	1.02	1.02	3	PREDICTED: WD-40 repeat-containing protein MSI1-like [Lupinus angustifolius]
OIW07425.1+XP_019450377.1	0.84426	1.05	1.05	2	hypothetical protein TanjilG_19266 [Lupinus angustifolius] PREDICTED: protein LURP-one-related 10-like [Lupinus angustifolius]
OIW19533.1+XP_019440681.1	0.84426	1.00	1.00	5	hypothetical protein TanjilG_06988 [Lupinus angustifolius] PREDICTED: probable sucrose-phosphate synthase [Lupinus angustifolius]
XP_019413728.1	0.84430	0.92	1.09	2	PREDICTED: F-box protein SKIP16 [Lupinus angustifolius]
XP_019455642.1+XP_019455076.1+XP_019455648.1+XP_019455645.1+XP_019455646.1+OIW05068.1+OIW04790.1+XP_019455644.1+XP_019455649.1	0.84430	1.07	1.07	9	PREDICTED: pre-mRNA-processing factor 39-like isoform X1 [Lupinus angustifolius] PREDICTED: pre-mRNA-processing factor 39-like [Lupinus angustifolius] PREDICTED: pre-mRNA-processing factor 39-like isoform X5 [Lupinus angustifolius] PREDICTED: pre-mRNA-processing factor 39-like isoform X3 [Lupinus angustifolius] PREDICTED: pre-mRNA-processing factor 39-like isoform X4 [Lupinus angustifolius] hypot…
YP_538789.1+YP_009127423.1	0.84430	0.94	1.06	2	ribosomal protein S12 [Glycine max] ribosomal protein S12 (chloroplast) [Indigofera tinctoria]
OIW11581.1+XP_019443876.1	0.84430	0.95	1.05	3	hypothetical protein TanjilG_26947 [Lupinus angustifolius] PREDICTED: uroporphyrinogen decarboxylase 1, chloroplastic [Lupinus angustifolius]
XP_019417833.1+OIV97056.1	0.84430	0.93	1.08	3	PREDICTED: RNA pseudouridine synthase 7 isoform X1 [Lupinus angustifolius] hypothetical protein TanjilG_00254 [Lupinus angustifolius]
XP_019418774.1+XP_019418770.1	0.84498	1.01	1.01	4	PREDICTED: probable tRNA N6-adenosine threonylcarbamoyltransferase isoform X2 [Lupinus angustifolius] PREDICTED: probable tRNA N6-adenosine threonylcarbamoyltransferase isoform X1 [Lupinus angustifolius]
XP_019428228.1	0.84498	1.09	1.09	2	PREDICTED: inactive LRR receptor-like serine/threonine-protein kinase BIR2 [Lupinus angustifolius]
OIV96853.1+XP_019416845.1+XP_019416846.1	0.84532	1.14	1.14	2	hypothetical protein TanjilG_08714, partial [Lupinus angustifolius] PREDICTED: MAG2-interacting protein 2 isoform X1 [Lupinus angustifolius] PREDICTED: MAG2-interacting protein 2 isoform X2 [Lupinus angustifolius]
XP_019437814.1+XP_019417353.1+XP_019437812.1	0.84532	0.98	1.02	7	PREDICTED: probable protein phosphatase 2C 59 isoform X2 [Lupinus angustifolius] PREDICTED: probable protein phosphatase 2C 59 [Lupinus angustifolius] PREDICTED: probable protein phosphatase 2C 59 isoform X1 [Lupinus angustifolius]
XP_019461398.1	0.84532	0.98	1.02	2	PREDICTED: digalactosyldiacylglycerol synthase 2, chloroplastic [Lupinus angustifolius]
XP_019425267.1+XP_019425266.1	0.84533	1.08	1.08	2	PREDICTED: non-classical arabinogalactan protein 31-like isoform X2 [Lupinus angustifolius] PREDICTED: non-classical arabinogalactan protein 31-like isoform X1 [Lupinus angustifolius]
XP_019433438.1	0.84533	1.06	1.06	2	PREDICTED: peptidyl-prolyl cis-trans isomerase CYP19-3 [Lupinus angustifolius]
XP_019458338.1+XP_019458339.1+OIW03555.1	0.84533	0.94	1.07	5	PREDICTED: alpha-galactosidase-like isoform X1 [Lupinus angustifolius] PREDICTED: alpha-galactosidase-like isoform X2 [Lupinus angustifolius] hypothetical protein TanjilG_30975 [Lupinus angustifolius]
XP_019452969.1	0.84551	0.93	1.08	4	PREDICTED: UDP-glucose 6-dehydrogenase 1-like [Lupinus angustifolius]
OIV94160.1+XP_019446172.1+XP_019446171.1+XP_019446170.1+XP_019420230.1+XP_019446168.1	0.84551	1.00	1.00	10	hypothetical protein TanjilG_03610 [Lupinus angustifolius] PREDICTED: eukaryotic peptide chain release factor GTP-binding subunit ERF3A-like isoform X4 [Lupinus angustifolius] PREDICTED: eukaryotic peptide chain release factor GTP-binding subunit ERF3A-like isoform X3 [Lupinus angustifolius] PREDICTED: eukaryotic peptide chain release factor GTP-binding subunit ERF3A-like isoform X2 [Lupinus angu…
XP_019418818.1	0.84551	1.07	1.07	6	PREDICTED: DEAD-box ATP-dependent RNA helicase 46-like [Lupinus angustifolius]
XP_019422136.1	0.84551	0.94	1.06	2	PREDICTED: vesicle-associated membrane protein 721-like [Lupinus angustifolius]
XP_019444498.1	0.84619	0.97	1.03	6	PREDICTED: selenocysteine methyltransferase-like [Lupinus angustifolius]
XP_019462638.1	0.84619	0.96	1.04	2	PREDICTED: ribonucleoside-diphosphate reductase large subunit [Lupinus angustifolius]
XP_019432519.1	0.84619	1.11	1.11	3	PREDICTED: probable acyl-activating enzyme 5, peroxisomal [Lupinus angustifolius]
XP_019455533.1	0.84619	1.06	1.06	10	PREDICTED: exocyst complex component EXO84B-like [Lupinus angustifolius]
OIV90921.1+XP_019427932.1+P52780.2	0.84619	1.01	1.01	4	hypothetical protein TanjilG_16881 [Lupinus angustifolius] PREDICTED: glutamine--tRNA ligase isoform X1 [Lupinus angustifolius] RecName: Full=Glutamine--tRNA ligase; AltName: Full=Glutaminyl-tRNA synthetase; Short=GlnRS
XP_019454082.1	0.84619	0.91	1.10	2	PREDICTED: pumilio homolog 2-like [Lupinus angustifolius]
XP_019416914.1+XP_019416915.1	0.84619	1.03	1.03	2	PREDICTED: serine carboxypeptidase-like 45 isoform X1 [Lupinus angustifolius] PREDICTED: serine carboxypeptidase-like 45 isoform X2 [Lupinus angustifolius]
OIV95919.1+XP_019419316.1	0.84636	1.06	1.06	3	hypothetical protein TanjilG_27023 [Lupinus angustifolius] PREDICTED: beta-D-xylosidase 1-like [Lupinus angustifolius]
XP_019464491.1+OIW00814.1	0.84636	1.04	1.04	3	PREDICTED: uncharacterized protein LOC109362879 [Lupinus angustifolius] hypothetical protein TanjilG_08109 [Lupinus angustifolius]
XP_019454192.1+OIW05683.1+XP_019454191.1+XP_019454186.1	0.84636	0.96	1.05	2	PREDICTED: glucose-1-phosphate adenylyltransferase large subunit 1-like isoform X3 [Lupinus angustifolius] hypothetical protein TanjilG_23469 [Lupinus angustifolius] PREDICTED: glucose-1-phosphate adenylyltransferase large subunit 1-like isoform X2 [Lupinus angustifolius] PREDICTED: glucose-1-phosphate adenylyltransferase large subunit 1-like isoform X1 [Lupinus angustifolius]
OIW17183.1+XP_019424750.1+XP_019424743.1	0.84653	0.93	1.07	2	hypothetical protein TanjilG_18138 [Lupinus angustifolius] PREDICTED: RWD domain-containing protein 1 isoform X2 [Lupinus angustifolius] PREDICTED: RWD domain-containing protein 1 isoform X1 [Lupinus angustifolius]
XP_019460885.1+OIW02035.1	0.84653	0.99	1.01	3	PREDICTED: probable polygalacturonase [Lupinus angustifolius] hypothetical protein TanjilG_13773 [Lupinus angustifolius]
XP_019427696.1	0.84653	1.12	1.12	4	PREDICTED: hypersensitive-induced response protein 2 [Lupinus angustifolius]
XP_019423582.1	0.84840	0.95	1.05	2	PREDICTED: uncharacterized protein LOC109332895 [Lupinus angustifolius]
XP_019448647.1+XP_019454057.1+XP_019448646.1+XP_019453919.1+XP_019458016.1+XP_019436223.1+XP_019450070.1+XP_019447932.1+OIW08613.1+XP_019413056.1+XP_019449628.1+XP_019444397.1	0.84840	1.08	1.08	2	PREDICTED: probable histone H2B.1 [Lupinus angustifolius] PREDICTED: probable histone H2B.1 [Lupinus angustifolius] PREDICTED: probable histone H2B.1 [Lupinus angustifolius] PREDICTED: probable histone H2B.3 [Lupinus angustifolius] PREDICTED: probable histone H2B.1 [Lupinus angustifolius] PREDICTED: probable histone H2B.1 [Lupinus angustifolius] PREDICTED: probable histone H2B.3 [Lupinus angustif…
XP_019428994.1	0.84856	0.99	1.01	4	PREDICTED: tubulin-folding cofactor B [Lupinus angustifolius]
XP_019424388.1	0.84856	1.02	1.02	2	PREDICTED: serine/threonine-protein kinase SAPK3-like [Lupinus angustifolius]
XP_019457542.1	0.84856	1.09	1.09	2	PREDICTED: basic 7S globulin-like [Lupinus angustifolius]
XP_019436480.1	0.84856	0.92	1.09	4	PREDICTED: 60S ribosomal protein L28-2-like [Lupinus angustifolius]
XP_019421872.1+OIV94393.1	0.84887	1.09	1.09	2	PREDICTED: conserved oligomeric Golgi complex subunit 6 [Lupinus angustifolius] hypothetical protein TanjilG_25455 [Lupinus angustifolius]
XP_019457127.1+XP_019430493.1+OIW11999.1+XP_019443265.1+OIW03576.1+XP_019430494.1+OIW20166.1+XP_019457128.1	0.85423	0.87	1.15	2	PREDICTED: eukaryotic translation initiation factor 3 subunit J-A-like isoform X1 [Lupinus angustifolius] PREDICTED: eukaryotic translation initiation factor 3 subunit J-like isoform X1 [Lupinus angustifolius] hypothetical protein TanjilG_16110 [Lupinus angustifolius] PREDICTED: eukaryotic translation initiation factor 3 subunit J-like [Lupinus angustifolius] hypothetical protein TanjilG_30996 [L…
XP_019463813.1	0.85423	0.98	1.02	4	PREDICTED: ras-related protein Rab11A [Lupinus angustifolius]
OIW17489.1	0.85689	1.21	1.21	5	hypothetical protein TanjilG_22601 [Lupinus angustifolius]
XP_019449839.1	0.85871	1.00	1.00	3	PREDICTED: RAB6A-GEF complex partner protein 1-like [Lupinus angustifolius]
XP_019441189.1	0.85871	0.96	1.05	2	PREDICTED: importin subunit alpha-2-like [Lupinus angustifolius]
XP_019437949.1	0.85883	0.89	1.13	4	PREDICTED: polyadenylate-binding protein 8-like [Lupinus angustifolius]
XP_019423159.1+OIV93101.1+XP_019423157.1+XP_019423158.1	0.85883	1.03	1.03	3	PREDICTED: paired amphipathic helix protein Sin3-like 4 isoform X3 [Lupinus angustifolius] hypothetical protein TanjilG_20763 [Lupinus angustifolius] PREDICTED: paired amphipathic helix protein Sin3-like 4 isoform X1 [Lupinus angustifolius] PREDICTED: paired amphipathic helix protein Sin3-like 4 isoform X2 [Lupinus angustifolius]
OIW01168.1+XP_019460726.1	0.85883	1.02	1.02	2	hypothetical protein TanjilG_10329 [Lupinus angustifolius] PREDICTED: importin-11 [Lupinus angustifolius]
XP_019431564.1	0.85883	0.85	1.17	2	PREDICTED: putative amidase C869.01 [Lupinus angustifolius]
XP_019461826.1+XP_019461827.1	0.86158	1.04	1.04	3	PREDICTED: CBS domain-containing protein CBSX3, mitochondrial-like isoform X1 [Lupinus angustifolius] PREDICTED: CBS domain-containing protein CBSX3, mitochondrial-like isoform X2 [Lupinus angustifolius]
XP_019414098.1+OIV98782.1	0.86158	0.97	1.04	2	PREDICTED: stress-induced-phosphoprotein 1 [Lupinus angustifolius] hypothetical protein TanjilG_20506 [Lupinus angustifolius]
XP_019454007.1	0.86158	1.02	1.02	2	PREDICTED: arogenate dehydratase/prephenate dehydratase 2, chloroplastic-like [Lupinus angustifolius]
XP_019443381.1	0.86158	1.02	1.02	9	PREDICTED: phospholipase D alpha 1 [Lupinus angustifolius]
XP_019448744.1	0.86158	1.02	1.02	2	PREDICTED: serine/threonine-protein phosphatase 6 regulatory subunit 3-like [Lupinus angustifolius]
XP_019444408.1+XP_019460998.1	0.86252	0.97	1.04	22	PREDICTED: 26S proteasome regulatory subunit 4 homolog A-like [Lupinus angustifolius] PREDICTED: 26S proteasome regulatory subunit 4 homolog A-like [Lupinus angustifolius]
XP_019425414.1+XP_019425413.1+XP_019455478.1	0.86252	1.08	1.08	3	PREDICTED: serine/threonine-protein phosphatase PP2A catalytic subunit-like isoform X2 [Lupinus angustifolius] PREDICTED: serine/threonine-protein phosphatase PP2A catalytic subunit-like isoform X1 [Lupinus angustifolius] PREDICTED: serine/threonine-protein phosphatase PP2A catalytic subunit [Lupinus angustifolius]
XP_019455512.1	0.86252	0.99	1.01	2	PREDICTED: trifunctional UDP-glucose 4,6-dehydratase/UDP-4-keto-6-deoxy-D-glucose 3,5-epimerase/UDP-4-keto-L-rhamnose-reductase RHM1-like [Lupinus angustifolius]
OIW21345.1+XP_019432785.1	0.86430	1.00	1.00	4	hypothetical protein TanjilG_32485 [Lupinus angustifolius] PREDICTED: thylakoid lumenal 29 kDa protein, chloroplastic [Lupinus angustifolius]
XP_019438211.1	0.86430	0.95	1.05	3	PREDICTED: nodal modulator 1-like isoform X1 [Lupinus angustifolius]
OIW10682.1+XP_019445277.1	0.86523	0.89	1.13	5	hypothetical protein TanjilG_16054 [Lupinus angustifolius] PREDICTED: binding partner of ACD11 1-like [Lupinus angustifolius]
XP_019422000.1	0.86523	0.98	1.02	5	PREDICTED: protein CDI [Lupinus angustifolius]
XP_019416701.1+OIV96497.1	0.86523	1.03	1.03	3	PREDICTED: peptidyl-prolyl cis-trans isomerase CYP95-like isoform X1 [Lupinus angustifolius] hypothetical protein TanjilG_07889 [Lupinus angustifolius]
XP_019419818.1+XP_019456099.1	0.86532	0.95	1.05	14	PREDICTED: uncharacterized protein LOC109330196 [Lupinus angustifolius] PREDICTED: uncharacterized protein LOC109356920 [Lupinus angustifolius]
XP_019463474.1	0.86532	0.94	1.07	4	PREDICTED: malate dehydrogenase, chloroplastic-like [Lupinus angustifolius]
XP_019422055.1	0.86532	0.92	1.08	7	PREDICTED: threonine--tRNA ligase, mitochondrial 1-like [Lupinus angustifolius]
XP_019442514.1+OIW12372.1	0.86532	0.94	1.06	2	PREDICTED: glucuronokinase 1-like [Lupinus angustifolius] hypothetical protein TanjilG_04121 [Lupinus angustifolius]
XP_019414387.1+OIV98111.1+XP_019417216.1+XP_019417218.1	0.86772	1.07	1.07	13	PREDICTED: beta-galactosidase 10-like [Lupinus angustifolius] hypothetical protein TanjilG_25976 [Lupinus angustifolius] PREDICTED: beta-galactosidase 10 isoform X1 [Lupinus angustifolius] PREDICTED: beta-galactosidase 10 isoform X2 [Lupinus angustifolius]
XP_019415973.1+XP_019415971.1+OIV96459.1	0.86772	1.00	1.00	2	PREDICTED: stromal cell-derived factor 2-like protein isoform X3 [Lupinus angustifolius] PREDICTED: stromal cell-derived factor 2-like protein isoform X1 [Lupinus angustifolius] hypothetical protein TanjilG_07851 [Lupinus angustifolius]
XP_019436405.1+XP_019436406.1+XP_019436407.1	0.86772	0.98	1.02	3	PREDICTED: nuclear pore complex protein NUP50A-like isoform X1 [Lupinus angustifolius] PREDICTED: nuclear pore complex protein NUP50A-like isoform X2 [Lupinus angustifolius] PREDICTED: nuclear pore complex protein NUP50A-like isoform X3 [Lupinus angustifolius]
XP_019460710.1+XP_019460703.1+XP_019460696.1	0.86772	1.02	1.02	3	PREDICTED: putative DEAD-box ATP-dependent RNA helicase 29 isoform X3 [Lupinus angustifolius] PREDICTED: putative DEAD-box ATP-dependent RNA helicase 29 isoform X2 [Lupinus angustifolius] PREDICTED: putative DEAD-box ATP-dependent RNA helicase 29 isoform X1 [Lupinus angustifolius]
XP_019417260.1+XP_019417259.1	0.86772	0.96	1.04	6	PREDICTED: SNF1-related protein kinase regulatory subunit gamma-1-like isoform X2 [Lupinus angustifolius] PREDICTED: SNF1-related protein kinase regulatory subunit gamma-1-like isoform X1 [Lupinus angustifolius]
OIW05905.1	0.86772	0.99	1.02	2	hypothetical protein TanjilG_23691 [Lupinus angustifolius]
XP_019432255.1+OIW21069.1	0.86772	0.99	1.01	3	PREDICTED: ER membrane protein complex subunit 1-like [Lupinus angustifolius] hypothetical protein TanjilG_28515 [Lupinus angustifolius]
XP_019443977.1+OIW11519.1	0.86792	1.07	1.07	2	PREDICTED: trafficking protein particle complex II-specific subunit 130 homolog isoform X1 [Lupinus angustifolius] hypothetical protein TanjilG_26885 [Lupinus angustifolius]
XP_019438247.1+OIW14704.1	0.86800	0.97	1.04	5	PREDICTED: 50S ribosomal protein L3, chloroplastic [Lupinus angustifolius] hypothetical protein TanjilG_33046 [Lupinus angustifolius]
XP_019426773.1	0.86800	1.11	1.11	2	PREDICTED: D-3-phosphoglycerate dehydrogenase 2, chloroplastic-like [Lupinus angustifolius]
XP_019425839.1	0.86800	1.01	1.01	3	PREDICTED: major allergen Pru ar 1-like [Lupinus angustifolius]
XP_019436509.1	0.86800	1.08	1.08	25	PREDICTED: seed linoleate 9S-lipoxygenase-3 [Lupinus angustifolius]
XP_019412766.1	0.86807	1.00	1.00	2	PREDICTED: mitogen-activated protein kinase 3-like [Lupinus angustifolius]
XP_019449843.1+OIW18835.1	0.86807	0.96	1.04	3	PREDICTED: actin-related protein 4-like isoform X1 [Lupinus angustifolius] hypothetical protein TanjilG_25278 [Lupinus angustifolius]
XP_019455953.1	0.86807	1.04	1.04	4	PREDICTED: DExH-box ATP-dependent RNA helicase DExH6-like [Lupinus angustifolius]
XP_019444300.1	0.86807	1.03	1.03	2	PREDICTED: UDP-glycosyltransferase 73C3-like [Lupinus angustifolius]
XP_019431346.1	0.86906	0.93	1.07	3	PREDICTED: 30S ribosomal protein S5, chloroplastic-like [Lupinus angustifolius]
OIW15916.1+XP_019436521.1+XP_019436520.1+XP_019436516.1+XP_019436523.1+XP_019436522.1	0.86906	1.03	1.03	2	hypothetical protein TanjilG_04451 [Lupinus angustifolius] PREDICTED: polyadenylate-binding protein-interacting protein 4-like isoform X3 [Lupinus angustifolius] PREDICTED: polyadenylate-binding protein-interacting protein 3-like isoform X2 [Lupinus angustifolius] PREDICTED: polyadenylate-binding protein-interacting protein 3-like isoform X1 [Lupinus angustifolius] PREDICTED: polyadenylate-bindin…
XP_019438090.1+XP_019438092.1	0.86906	1.03	1.03	5	PREDICTED: WD repeat-containing protein DWA2-like isoform X1 [Lupinus angustifolius] PREDICTED: WD repeat-containing protein DWA2-like isoform X2 [Lupinus angustifolius]
XP_019452451.1	0.86906	1.05	1.05	3	PREDICTED: phosphatidylinositol 3,4,5-trisphosphate 3-phosphatase and protein-tyrosine-phosphatase PTEN2A-like [Lupinus angustifolius]
XP_019462495.1+XP_019437754.1	0.86906	1.07	1.07	2	PREDICTED: COMPASS-like H3K4 histone methylase component WDR5A [Lupinus angustifolius] PREDICTED: COMPASS-like H3K4 histone methylase component WDR5A [Lupinus angustifolius]
XP_019440724.1	0.86981	0.86	1.16	2	PREDICTED: glutathione S-transferase F10-like [Lupinus angustifolius]
XP_019455949.1+OIW04196.1	0.86981	0.89	1.12	2	PREDICTED: DEAD-box ATP-dependent RNA helicase 53-like [Lupinus angustifolius] hypothetical protein TanjilG_00756 [Lupinus angustifolius]
OIW07295.1+XP_019451172.1	0.87009	1.00	1.00	2	hypothetical protein TanjilG_11929 [Lupinus angustifolius] PREDICTED: protein-tyrosine-phosphatase MKP1-like [Lupinus angustifolius]
XP_019455698.1+OIW04356.1+XP_019455701.1+XP_019455700.1	0.87009	1.00	1.00	8	PREDICTED: phosphomethylpyrimidine synthase, chloroplastic isoform X1 [Lupinus angustifolius] hypothetical protein TanjilG_32548 [Lupinus angustifolius] PREDICTED: phosphomethylpyrimidine synthase, chloroplastic isoform X3 [Lupinus angustifolius] PREDICTED: phosphomethylpyrimidine synthase, chloroplastic isoform X2 [Lupinus angustifolius]
XP_019453673.1	0.87009	1.04	1.04	6	PREDICTED: ketol-acid reductoisomerase, chloroplastic [Lupinus angustifolius]
OIW17777.1+XP_019463421.1	0.87009	0.94	1.06	4	hypothetical protein TanjilG_06462 [Lupinus angustifolius] PREDICTED: 11-beta-hydroxysteroid dehydrogenase 1B-like [Lupinus angustifolius]
XP_019449968.1+XP_019449967.1	0.87009	0.88	1.14	3	PREDICTED: heterogeneous nuclear ribonucleoprotein 1-like isoform X2 [Lupinus angustifolius] PREDICTED: heterogeneous nuclear ribonucleoprotein 1-like isoform X1 [Lupinus angustifolius]
XP_019460552.1+OIW02451.1	0.87009	1.09	1.09	3	PREDICTED: uncharacterized protein LOC109360259 [Lupinus angustifolius] hypothetical protein TanjilG_05044 [Lupinus angustifolius]
XP_019415438.1	0.87023	0.96	1.04	2	PREDICTED: activating signal cointegrator 1 complex subunit 2 [Lupinus angustifolius]
XP_019463349.1	0.87161	1.04	1.04	2	PREDICTED: protein SCAI [Lupinus angustifolius]
XP_019415422.1+XP_019415420.1	0.87167	0.96	1.04	3	PREDICTED: V-type proton ATPase subunit a3-like isoform X2 [Lupinus angustifolius] PREDICTED: V-type proton ATPase subunit a3-like isoform X1 [Lupinus angustifolius]
OIV98842.1+XP_019464922.1+OIV94135.1+XP_019446199.1+OIW10099.1+XP_019420296.1	0.87167	1.10	1.10	3	hypothetical protein TanjilG_08498 [Lupinus angustifolius] PREDICTED: small nuclear ribonucleoprotein Sm D2-like [Lupinus angustifolius] hypothetical protein TanjilG_31560 [Lupinus angustifolius] PREDICTED: small nuclear ribonucleoprotein Sm D2-like [Lupinus angustifolius] hypothetical protein TanjilG_21936 [Lupinus angustifolius] PREDICTED: small nuclear ribonucleoprotein Sm D2-like [Lupinus ang…
XP_019434006.1	0.87167	1.01	1.01	12	PREDICTED: SEC1 family transport protein SLY1 isoform X1 [Lupinus angustifolius]
XP_019415307.1	0.87167	1.03	1.03	2	PREDICTED: protein EXORDIUM-like [Lupinus angustifolius]
XP_019420169.1	0.87192	1.07	1.07	3	PREDICTED: abscisic acid receptor PYR1-like [Lupinus angustifolius]
XP_019424682.1+XP_019456703.1	0.87192	1.00	1.00	10	PREDICTED: DEAD-box ATP-dependent RNA helicase 20-like [Lupinus angustifolius] PREDICTED: DEAD-box ATP-dependent RNA helicase 20-like [Lupinus angustifolius]
OIW12025.1+XP_019443208.1	0.87211	1.00	1.00	2	hypothetical protein TanjilG_27322 [Lupinus angustifolius] PREDICTED: KH domain-containing protein At5g56140-like [Lupinus angustifolius]
XP_019439055.1	0.87211	0.97	1.03	5	PREDICTED: agmatine deiminase [Lupinus angustifolius]
XP_019458154.1	0.87211	1.15	1.15	3	PREDICTED: uncharacterized protein LOC109358406 [Lupinus angustifolius]
XP_019447927.1+XP_019447929.1+XP_019447928.1+OIW09167.1	0.87211	1.06	1.06	3	PREDICTED: probable NOT transcription complex subunit VIP2 isoform X1 [Lupinus angustifolius] PREDICTED: probable NOT transcription complex subunit VIP2 isoform X3 [Lupinus angustifolius] PREDICTED: probable NOT transcription complex subunit VIP2 isoform X2 [Lupinus angustifolius] hypothetical protein TanjilG_11305 [Lupinus angustifolius]
XP_019448177.1+OIW09023.1+OIW03798.1+XP_019458104.1+XP_019436457.1	0.87211	1.11	1.11	14	PREDICTED: ABC transporter G family member 36-like [Lupinus angustifolius] hypothetical protein TanjilG_05999 [Lupinus angustifolius] hypothetical protein TanjilG_30074 [Lupinus angustifolius] PREDICTED: ABC transporter G family member 36-like [Lupinus angustifolius] PREDICTED: ABC transporter G family member 36-like [Lupinus angustifolius]
OIW10702.1+XP_019445255.1	0.87280	0.86	1.16	2	hypothetical protein TanjilG_16074 [Lupinus angustifolius] PREDICTED: secretory carrier-associated membrane protein 4-like [Lupinus angustifolius]
XP_019453758.1	0.87280	1.08	1.08	2	PREDICTED: lactation elevated protein 1-like [Lupinus angustifolius]
XP_019426455.1	0.87280	0.97	1.04	2	PREDICTED: inositol-phosphate phosphatase-like [Lupinus angustifolius]
OIV96492.1+XP_019416733.1+XP_019425619.1	0.87285	1.11	1.11	2	hypothetical protein TanjilG_07884 [Lupinus angustifolius] PREDICTED: cellulose synthase A catalytic subunit 1 [UDP-forming]-like [Lupinus angustifolius] PREDICTED: cellulose synthase A catalytic subunit 4 [UDP-forming] [Lupinus angustifolius]
OIV92023.1+XP_019426091.1	0.87285	1.09	1.09	2	hypothetical protein TanjilG_20180 [Lupinus angustifolius] PREDICTED: uncharacterized protein LOC109334662 [Lupinus angustifolius]
XP_019440458.1+XP_019430123.1+OIW11320.1+OIV95063.1+XP_019444291.1+XP_019432874.1+XP_019419249.1+XP_019454462.1	0.87285	0.99	1.01	6	PREDICTED: 60S ribosomal protein L24-like [Lupinus angustifolius] PREDICTED: 60S ribosomal protein L24-like [Lupinus angustifolius] hypothetical protein TanjilG_20469 [Lupinus angustifolius] hypothetical protein TanjilG_10883 [Lupinus angustifolius] PREDICTED: 60S ribosomal protein L24-like isoform X1 [Lupinus angustifolius] PREDICTED: 60S ribosomal protein L24-like [Lupinus angustifolius] PREDIC…
XP_019422420.1+XP_019432266.1	0.87285	0.98	1.02	2	PREDICTED: 60S ribosomal protein L27a-3 [Lupinus angustifolius] PREDICTED: 60S ribosomal protein L27a-3-like [Lupinus angustifolius]
XP_019421208.1+XP_019421557.1	0.87297	1.01	1.01	20	PREDICTED: 60S ribosomal protein L8-3 isoform X1 [Lupinus angustifolius] PREDICTED: 60S ribosomal protein L8-3-like [Lupinus angustifolius]
XP_019428446.1	0.87297	1.00	1.00	3	PREDICTED: flowering locus K homology domain-like isoform X3 [Lupinus angustifolius]
XP_019449568.1	0.87297	1.02	1.02	5	PREDICTED: uncharacterized protein LOC109352166 [Lupinus angustifolius]
XP_019447164.1	0.87463	0.95	1.05	12	PREDICTED: arginase 1, mitochondrial [Lupinus angustifolius]
OIW02331.1+XP_019460215.1+XP_019457109.1	0.87463	1.06	1.06	3	hypothetical protein TanjilG_11225 [Lupinus angustifolius] PREDICTED: serine acetyltransferase 5-like [Lupinus angustifolius] PREDICTED: serine acetyltransferase 5-like [Lupinus angustifolius]
XP_019421102.1	0.87468	0.92	1.08	3	PREDICTED: haloacid dehalogenase-like hydrolase domain-containing protein Sgpp [Lupinus angustifolius]
XP_019413931.1	0.87468	0.92	1.09	2	PREDICTED: copper transport protein ATX1-like [Lupinus angustifolius]
XP_019441586.1	0.87468	0.94	1.07	4	PREDICTED: pirin-like protein [Lupinus angustifolius]
XP_019449919.1	0.87468	0.95	1.05	3	PREDICTED: LETM1 and EF-hand domain-containing protein 1, mitochondrial-like [Lupinus angustifolius]
XP_019445834.1	0.87812	0.91	1.10	2	PREDICTED: uncharacterized protein LOC109349471 [Lupinus angustifolius]
XP_019431752.1+OIW20798.1+XP_019431753.1	0.87812	1.08	1.08	2	PREDICTED: bifunctional riboflavin kinase/FMN phosphatase-like isoform X1 [Lupinus angustifolius] hypothetical protein TanjilG_23178 [Lupinus angustifolius] PREDICTED: bifunctional riboflavin kinase/FMN phosphatase-like isoform X2 [Lupinus angustifolius]
XP_019459035.1	0.87812	0.92	1.08	4	PREDICTED: peptidyl-prolyl cis-trans isomerase E [Lupinus angustifolius]
XP_019461217.1+XP_019428698.1+OIV90611.1	0.87812	1.03	1.03	2	PREDICTED: exocyst complex component EXO70A1-like [Lupinus angustifolius] PREDICTED: exocyst complex component EXO70A1-like [Lupinus angustifolius] hypothetical protein TanjilG_01692 [Lupinus angustifolius]
XP_019442846.1	0.87812	1.01	1.01	3	PREDICTED: phosducin-like protein 3 [Lupinus angustifolius]
XP_019427528.1	0.87812	0.98	1.02	3	PREDICTED: perakine reductase-like [Lupinus angustifolius]
XP_019452218.1+XP_019452219.1+XP_019452221.1+XP_019452222.1+XP_019452220.1	0.87884	1.00	1.00	2	PREDICTED: 5'-3' exoribonuclease 4-like isoform X1 [Lupinus angustifolius] PREDICTED: 5'-3' exoribonuclease 4-like isoform X2 [Lupinus angustifolius] PREDICTED: 5'-3' exoribonuclease 4-like isoform X4 [Lupinus angustifolius] PREDICTED: 5'-3' exoribonuclease 4-like isoform X5 [Lupinus angustifolius] PREDICTED: 5'-3' exoribonuclease 4-like isoform X3 [Lupinus angustifolius]
XP_019455720.1	0.87884	1.00	1.00	3	PREDICTED: 5'-nucleotidase domain-containing protein 4-like [Lupinus angustifolius]
XP_019452418.1	0.87884	1.04	1.04	4	PREDICTED: alpha,alpha-trehalose-phosphate synthase [UDP-forming] 5-like [Lupinus angustifolius]
XP_019439048.1+OIW12875.1	0.87884	1.00	1.00	7	PREDICTED: alpha-L-fucosidase 2 [Lupinus angustifolius] hypothetical protein TanjilG_24808 [Lupinus angustifolius]
XP_019430365.1	0.87884	1.04	1.04	7	PREDICTED: probable N-acetyl-gamma-glutamyl-phosphate reductase, chloroplastic [Lupinus angustifolius]
XP_019425707.1	0.87957	0.96	1.04	2	PREDICTED: DExH-box ATP-dependent RNA helicase DExH11 isoform X1 [Lupinus angustifolius]
OIW20076.1+XP_019430345.1	0.87957	0.98	1.02	4	hypothetical protein TanjilG_00567 [Lupinus angustifolius] PREDICTED: purple acid phosphatase 18-like [Lupinus angustifolius]
XP_019453104.1	0.87961	0.95	1.05	14	PREDICTED: fumarate hydratase 1, mitochondrial [Lupinus angustifolius]
XP_019439894.1	0.87961	0.94	1.06	3	PREDICTED: protein PELOTA 1 isoform X1 [Lupinus angustifolius]
XP_019460232.1+XP_019460235.1+XP_019460236.1	0.87961	1.11	1.11	2	PREDICTED: subtilisin-like protease Glyma18g48580 isoform X1 [Lupinus angustifolius] PREDICTED: subtilisin-like protease Glyma18g48580 isoform X3 [Lupinus angustifolius] PREDICTED: subtilisin-like protease Glyma18g48580 isoform X4 [Lupinus angustifolius]
XP_019457935.1	0.87961	0.94	1.06	8	PREDICTED: aldose 1-epimerase-like [Lupinus angustifolius]
XP_019421960.1	0.87967	1.05	1.05	11	PREDICTED: DNA replication licensing factor MCM7 [Lupinus angustifolius]
XP_019428798.1	0.87967	0.99	1.01	5	PREDICTED: probable methyltransferase PMT3 [Lupinus angustifolius]
XP_019416065.1	0.87967	0.96	1.04	4	PREDICTED: GDSL esterase/lipase At5g45920-like [Lupinus angustifolius]
XP_019425058.1	0.88142	0.87	1.15	4	PREDICTED: heat shock 70 kDa protein 15-like isoform X1 [Lupinus angustifolius]
XP_019440500.1	0.88142	0.92	1.09	4	PREDICTED: probable ribose-5-phosphate isomerase 3, chloroplastic [Lupinus angustifolius]
XP_019463778.1+XP_019456883.1	0.88142	1.15	1.15	2	PREDICTED: serine/threonine-protein kinase STY8-like [Lupinus angustifolius] PREDICTED: serine/threonine-protein kinase HT1-like isoform X1 [Lupinus angustifolius]
XP_019437738.1	0.88142	1.05	1.05	6	PREDICTED: glycine dehydrogenase (decarboxylating), mitochondrial-like [Lupinus angustifolius]
XP_019419002.1	0.88142	1.04	1.04	4	PREDICTED: GDSL esterase/lipase At5g33370-like [Lupinus angustifolius]
XP_019426080.1	0.88218	0.97	1.03	9	PREDICTED: DNA-binding protein SMUBP-2 [Lupinus angustifolius]
XP_019427071.1+OIW16997.1	0.88218	1.05	1.05	7	PREDICTED: acetyl-coenzyme A synthetase, chloroplastic/glyoxysomal-like [Lupinus angustifolius] hypothetical protein TanjilG_32864 [Lupinus angustifolius]
OIW16177.1+XP_019433391.1	0.88218	0.98	1.02	3	hypothetical protein TanjilG_18892 [Lupinus angustifolius] PREDICTED: probable signal peptidase complex subunit 2 [Lupinus angustifolius]
XP_019413194.1+OIV99262.1	0.88218	1.20	1.20	2	PREDICTED: apoptosis-inducing factor homolog A-like [Lupinus angustifolius] hypothetical protein TanjilG_17072 [Lupinus angustifolius]
XP_019464495.1	0.88218	0.98	1.02	5	PREDICTED: acylpyruvase FAHD1, mitochondrial-like [Lupinus angustifolius]
XP_019412678.1+XP_019450892.1+XP_019450891.1	0.88292	1.08	1.08	14	PREDICTED: sulfite reductase [ferredoxin], chloroplastic [Lupinus angustifolius] PREDICTED: sulfite reductase [ferredoxin], chloroplastic-like isoform X2 [Lupinus angustifolius] PREDICTED: sulfite reductase [ferredoxin], chloroplastic-like isoform X1 [Lupinus angustifolius]
OIW00807.1+XP_019464144.1	0.88292	1.04	1.04	14	hypothetical protein TanjilG_18609 [Lupinus angustifolius] PREDICTED: uncharacterized protein LOC109362647 [Lupinus angustifolius]
XP_019446959.1+OIV93801.1+XP_019420768.1+OIW09582.1	0.88294	0.95	1.05	2	PREDICTED: plant UBX domain-containing protein 7 [Lupinus angustifolius] hypothetical protein TanjilG_03764 [Lupinus angustifolius] PREDICTED: plant UBX domain-containing protein 7-like [Lupinus angustifolius] hypothetical protein TanjilG_28181 [Lupinus angustifolius]
XP_019458143.1	0.88294	1.04	1.04	17	PREDICTED: protein TPLATE [Lupinus angustifolius]
XP_019461341.1+XP_019461344.1+XP_019461345.1	0.88294	0.97	1.03	7	PREDICTED: ubiquitin carboxyl-terminal hydrolase 12-like isoform X1 [Lupinus angustifolius] PREDICTED: ubiquitin carboxyl-terminal hydrolase 12-like isoform X3 [Lupinus angustifolius] PREDICTED: ubiquitin carboxyl-terminal hydrolase 12-like isoform X4 [Lupinus angustifolius]
XP_019417781.1	0.88294	1.00	1.00	3	PREDICTED: 60S ribosomal protein L9-like [Lupinus angustifolius]
XP_019464191.1+OIW00424.1	0.88378	1.03	1.03	4	PREDICTED: bifunctional aspartate aminotransferase and glutamate/aspartate-prephenate aminotransferase-like [Lupinus angustifolius] hypothetical protein TanjilG_05774 [Lupinus angustifolius]
XP_019463939.1+XP_019449738.1+XP_019449751.1	0.88536	0.91	1.09	2	PREDICTED: ATP synthase subunit delta', mitochondrial-like [Lupinus angustifolius] PREDICTED: ATP synthase subunit delta', mitochondrial-like [Lupinus angustifolius] PREDICTED: ATP synthase subunit delta', mitochondrial-like [Lupinus angustifolius]
XP_019455950.1	0.88536	1.09	1.09	2	PREDICTED: serine--glyoxylate aminotransferase [Lupinus angustifolius]
XP_019427168.1	0.88615	1.05	1.05	2	PREDICTED: protein RAE1-like [Lupinus angustifolius]
XP_019420944.1+OIV94467.1	0.88615	0.93	1.08	2	PREDICTED: probable cytosolic oligopeptidase A [Lupinus angustifolius] hypothetical protein TanjilG_25529 [Lupinus angustifolius]
XP_019428528.1+XP_019452506.1+OIW06913.1	0.88615	0.94	1.06	6	PREDICTED: U2 small nuclear ribonucleoprotein A'-like [Lupinus angustifolius] PREDICTED: U2 small nuclear ribonucleoprotein A'-like [Lupinus angustifolius] hypothetical protein TanjilG_19562 [Lupinus angustifolius]
OIV91575.1+XP_019425690.1	0.88850	0.91	1.10	2	hypothetical protein TanjilG_08987 [Lupinus angustifolius] PREDICTED: CD2 antigen cytoplasmic tail-binding protein 2 [Lupinus angustifolius]
XP_019429532.1+OIV89982.1	0.88850	0.98	1.02	2	PREDICTED: piRNA biogenesis protein EXD1 [Lupinus angustifolius] hypothetical protein TanjilG_00360 [Lupinus angustifolius]
AGT02364.1	0.88850	1.08	1.08	2	putative 3-dehydroquinate synthase, partial [Lupinus campestris]
XP_019462334.1+OIW17873.1	0.88850	0.91	1.10	3	PREDICTED: MICOS complex subunit MIC60-like [Lupinus angustifolius] hypothetical protein TanjilG_14119 [Lupinus angustifolius]
XP_019448051.1	0.88850	1.15	1.15	2	PREDICTED: alkaline/neutral invertase E, chloroplastic [Lupinus angustifolius]
XP_019416930.1+OIV96402.1	0.88927	1.01	1.01	3	PREDICTED: uncharacterized protein LOC109328104 [Lupinus angustifolius] hypothetical protein TanjilG_09829 [Lupinus angustifolius]
XP_019415332.1+XP_019415334.1	0.88927	0.99	1.01	5	PREDICTED: tRNA-dihydrouridine(47) synthase [NAD(P)(+)]-like isoform X1 [Lupinus angustifolius] PREDICTED: tRNA-dihydrouridine(47) synthase [NAD(P)(+)]-like isoform X3 [Lupinus angustifolius]
XP_019444586.1+XP_019444585.1	0.88927	0.95	1.06	2	PREDICTED: WEB family protein At3g02930, chloroplastic-like isoform X2 [Lupinus angustifolius] PREDICTED: WEB family protein At3g02930, chloroplastic-like isoform X1 [Lupinus angustifolius]
XP_019417757.1	0.88927	0.95	1.05	3	PREDICTED: apoptosis inhibitor 5-like protein API5 [Lupinus angustifolius]
XP_019454281.1	0.88927	0.89	1.12	2	PREDICTED: nascent polypeptide-associated complex subunit alpha-like protein 1 [Lupinus angustifolius]
XP_019441612.1+OIW12800.1	0.88927	1.04	1.04	7	PREDICTED: callose synthase 9-like [Lupinus angustifolius] hypothetical protein TanjilG_24733 [Lupinus angustifolius]
XP_019418266.1+OIV95493.1	0.89006	0.93	1.08	2	PREDICTED: calmodulin-like [Lupinus angustifolius] hypothetical protein TanjilG_26756 [Lupinus angustifolius]
XP_019429194.1	0.89006	1.06	1.06	4	PREDICTED: pectin acetylesterase 10-like [Lupinus angustifolius]
XP_019458348.1	0.89083	1.02	1.02	2	PREDICTED: glyceraldehyde-3-phosphate dehydrogenase A, chloroplastic [Lupinus angustifolius]
OIW21661.1+XP_019433532.1	0.89083	1.03	1.03	3	hypothetical protein TanjilG_07281 [Lupinus angustifolius] PREDICTED: cytochrome P450 704C1-like [Lupinus angustifolius]
XP_019420934.1	0.89083	1.01	1.01	7	PREDICTED: vacuolar protein sorting-associated protein 52 A [Lupinus angustifolius]
XP_019445121.1	0.89159	0.89	1.12	2	PREDICTED: ABC transporter E family member 2-like [Lupinus angustifolius]
XP_019419649.1+XP_019419648.1+XP_019419647.1	0.89312	1.00	1.00	2	PREDICTED: peroxisome biogenesis protein 5-like isoform X3 [Lupinus angustifolius] PREDICTED: peroxisome biogenesis protein 5-like isoform X2 [Lupinus angustifolius] PREDICTED: peroxisome biogenesis protein 5-like isoform X1 [Lupinus angustifolius]
XP_019464703.1	0.89312	1.06	1.06	5	PREDICTED: probable methyltransferase At1g27930 [Lupinus angustifolius]
XP_019461515.1	0.89463	0.90	1.11	4	PREDICTED: uncharacterized protein LOC109360827 [Lupinus angustifolius]
XP_019453662.1	0.89463	0.95	1.06	3	PREDICTED: ribosome maturation protein SBDS-like [Lupinus angustifolius]
XP_019458201.1	0.89463	0.84	1.18	3	PREDICTED: profilin-1-like [Lupinus angustifolius]
OIV99274.1+XP_019453857.1+XP_019413416.1+XP_019413414.1	0.89463	1.08	1.08	2	hypothetical protein TanjilG_17084 [Lupinus angustifolius] PREDICTED: heterogeneous nuclear ribonucleoprotein Q-like [Lupinus angustifolius] PREDICTED: heterogeneous nuclear ribonucleoprotein Q-like isoform X2 [Lupinus angustifolius] PREDICTED: heterogeneous nuclear ribonucleoprotein Q-like isoform X1 [Lupinus angustifolius]
XP_019448442.1+XP_019448439.1+OIW08871.1+XP_019448440.1+XP_019448441.1+XP_019448438.1	0.89465	1.05	1.05	3	PREDICTED: serine/threonine-protein kinase OSR1 isoform X5 [Lupinus angustifolius] PREDICTED: serine/threonine-protein kinase OSR1 isoform X2 [Lupinus angustifolius] hypothetical protein TanjilG_05846 [Lupinus angustifolius] PREDICTED: serine/threonine-protein kinase OSR1 isoform X3 [Lupinus angustifolius] PREDICTED: serine/threonine-protein kinase OSR1 isoform X4 [Lupinus angustifolius] PREDICTE…
XP_019417725.1+XP_019414970.1+XP_019438020.1	0.89465	0.96	1.05	6	PREDICTED: 26S protease regulatory subunit 10B homolog A-like [Lupinus angustifolius] PREDICTED: 26S protease regulatory subunit S10B homolog B [Lupinus angustifolius] PREDICTED: 26S protease regulatory subunit 10B homolog A isoform X1 [Lupinus angustifolius]
XP_019425636.1	0.89538	1.07	1.07	6	PREDICTED: uncharacterized protein LOC109334358 [Lupinus angustifolius]
XP_019417591.1	0.89538	0.97	1.03	4	PREDICTED: translation initiation factor eIF-2B subunit beta [Lupinus angustifolius]
XP_019415014.1	0.89538	0.96	1.04	5	PREDICTED: 26S proteasome non-ATPase regulatory subunit 11 homolog [Lupinus angustifolius]
XP_019427957.1+XP_019427955.1+XP_019427956.1	0.89609	0.99	1.01	2	PREDICTED: DDB1- and CUL4-associated factor 8 isoform X3 [Lupinus angustifolius] PREDICTED: DDB1- and CUL4-associated factor 8 isoform X1 [Lupinus angustifolius] PREDICTED: DDB1- and CUL4-associated factor 8 isoform X2 [Lupinus angustifolius]
XP_019421446.1	0.89609	0.96	1.04	3	PREDICTED: polyadenylate-binding protein 8-like [Lupinus angustifolius]
XP_019464902.1+OIW12556.1+XP_019442048.1	0.89609	0.95	1.05	4	PREDICTED: 40S ribosomal protein S18-like [Lupinus angustifolius] hypothetical protein TanjilG_04720 [Lupinus angustifolius] PREDICTED: 40S ribosomal protein S18-like [Lupinus angustifolius]
XP_019415072.1+XP_019458807.1	0.89609	1.04	1.04	3	PREDICTED: probable methyltransferase PMT26 [Lupinus angustifolius] PREDICTED: probable methyltransferase PMT26 [Lupinus angustifolius]
XP_019427810.1+OIV90850.1	0.89612	0.93	1.07	10	PREDICTED: glucose and ribitol dehydrogenase homolog 1-like isoform X1 [Lupinus angustifolius] hypothetical protein TanjilG_15583 [Lupinus angustifolius]
XP_019453559.1	0.89612	0.91	1.09	2	PREDICTED: phosphoenolpyruvate carboxylase, housekeeping isozyme-like [Lupinus angustifolius]
XP_019427320.1	0.89612	0.91	1.09	15	PREDICTED: 2,3-bisphosphoglycerate-independent phosphoglycerate mutase-like isoform X1 [Lupinus angustifolius]
XP_019422914.1	0.89754	1.02	1.02	2	PREDICTED: aldehyde dehydrogenase family 2 member C4-like [Lupinus angustifolius]
XP_019428938.1	0.89754	0.95	1.05	6	PREDICTED: RAN GTPase-activating protein 2-like [Lupinus angustifolius]
XP_019449384.1	0.89754	0.98	1.02	3	PREDICTED: uridine 5'-monophosphate synthase-like [Lupinus angustifolius]
XP_019447658.1	0.89754	0.96	1.04	8	PREDICTED: N-carbamoylputrescine amidase [Lupinus angustifolius]
XP_019425792.1	0.89754	1.04	1.04	5	PREDICTED: calcium-dependent protein kinase 2-like [Lupinus angustifolius]
XP_019449488.1+XP_019449486.1	0.89754	0.96	1.04	2	PREDICTED: ribonuclease P protein subunit p25-like protein isoform X2 [Lupinus angustifolius] PREDICTED: ribonuclease P protein subunit p25-like protein isoform X1 [Lupinus angustifolius]
XP_019443350.1+OIW11978.1	0.89754	0.78	1.29	2	PREDICTED: glycerol kinase-like [Lupinus angustifolius] hypothetical protein TanjilG_02185 [Lupinus angustifolius]
XP_019422617.1+OIV93565.1+XP_019422616.1	0.89978	0.99	1.01	2	PREDICTED: uncharacterized protein LOC109332186 isoform X2 [Lupinus angustifolius] hypothetical protein TanjilG_04797 [Lupinus angustifolius] PREDICTED: uncharacterized protein LOC109332186 isoform X1 [Lupinus angustifolius]
XP_019443635.1	0.89986	0.95	1.05	2	PREDICTED: (+)-neomenthol dehydrogenase-like [Lupinus angustifolius]
XP_019451719.1+OIW18520.1	0.89986	1.02	1.02	3	PREDICTED: phosphoserine phosphatase, chloroplastic-like [Lupinus angustifolius] hypothetical protein TanjilG_13272 [Lupinus angustifolius]
OIW06682.1+XP_019452897.1	0.89986	1.04	1.04	3	hypothetical protein TanjilG_04076 [Lupinus angustifolius] PREDICTED: senescence-associated carboxylesterase 101 [Lupinus angustifolius]
OIW18427.1+XP_019450505.1	0.90114	1.09	1.09	2	hypothetical protein TanjilG_13179 [Lupinus angustifolius] PREDICTED: nudix hydrolase 2-like [Lupinus angustifolius]
XP_019429830.1	0.90114	1.06	1.06	3	PREDICTED: long chain base biosynthesis protein 1-like [Lupinus angustifolius]
XP_019419836.1	0.90114	1.02	1.02	14	PREDICTED: branched-chain-amino-acid aminotransferase-like protein 1 isoform X1 [Lupinus angustifolius]
XP_019427768.1+OIV90787.1	0.90114	1.03	1.03	6	PREDICTED: probable aminopyrimidine aminohydrolase, mitochondrial [Lupinus angustifolius] hypothetical protein TanjilG_15520 [Lupinus angustifolius]
XP_019431435.1	0.90118	0.89	1.12	5	PREDICTED: peroxidase 44-like [Lupinus angustifolius]
OIV92029.1+XP_019425678.1+XP_019425677.1	0.90118	0.99	1.01	9	hypothetical protein TanjilG_19497 [Lupinus angustifolius] PREDICTED: enhancer of mRNA-decapping protein 4-like isoform X2 [Lupinus angustifolius] PREDICTED: enhancer of mRNA-decapping protein 4-like isoform X1 [Lupinus angustifolius]
XP_019445729.1	0.90118	0.93	1.07	2	PREDICTED: dolichol-phosphate mannosyltransferase subunit 1 [Lupinus angustifolius]
XP_019413281.1	0.90118	0.91	1.10	2	PREDICTED: phenylalanine--tRNA ligase alpha subunit, cytoplasmic-like [Lupinus angustifolius]
XP_019465456.1	0.90118	0.90	1.11	2	PREDICTED: UMP-CMP kinase 3-like [Lupinus angustifolius]
XP_019439193.1+OIW14346.1	0.90127	0.94	1.07	2	PREDICTED: DEAD-box ATP-dependent RNA helicase 22 [Lupinus angustifolius] hypothetical protein TanjilG_31236 [Lupinus angustifolius]
XP_019458535.1	0.90127	0.97	1.03	2	PREDICTED: threonine synthase, chloroplastic-like [Lupinus angustifolius]
XP_019441858.1	0.90185	0.95	1.05	2	PREDICTED: NKAP family protein [Lupinus angustifolius]
XP_019431385.1	0.90185	0.94	1.06	3	PREDICTED: beta-amylase 1, chloroplastic-like [Lupinus angustifolius]
XP_019428694.1+XP_019442592.1	0.90185	0.92	1.09	4	PREDICTED: proteasome subunit alpha type-4-A-like [Lupinus angustifolius] PREDICTED: proteasome subunit alpha type-4-A-like [Lupinus angustifolius]
OIW17922.1+XP_019461781.1	0.90198	0.88	1.13	2	hypothetical protein TanjilG_17758 [Lupinus angustifolius] PREDICTED: transmembrane 9 superfamily member 1 [Lupinus angustifolius]
XP_019431145.1	0.90198	0.93	1.07	4	PREDICTED: RNA-binding KH domain-containing protein PEPPER-like [Lupinus angustifolius]
OIW15798.1+XP_019436300.1	0.90198	1.00	1.00	3	hypothetical protein TanjilG_04333 [Lupinus angustifolius] PREDICTED: AP-2 complex subunit alpha-1-like isoform X1 [Lupinus angustifolius]
XP_019461977.1+OIW01304.1+XP_019462113.1	0.90256	1.00	1.00	2	PREDICTED: 40S ribosomal protein S8-like [Lupinus angustifolius] hypothetical protein TanjilG_10465 [Lupinus angustifolius] PREDICTED: 40S ribosomal protein S8-like, partial [Lupinus angustifolius]
OIW10093.1+XP_019446206.1	0.90256	0.92	1.09	2	hypothetical protein TanjilG_21930 [Lupinus angustifolius] PREDICTED: probable phospholipid hydroperoxide glutathione peroxidase [Lupinus angustifolius]
XP_019430800.1	0.90256	0.97	1.03	3	PREDICTED: ras-related protein RABE1a-like [Lupinus angustifolius]
XP_019443080.1	0.90321	1.08	1.08	2	PREDICTED: phenylalanine ammonia-lyase class 1-like [Lupinus angustifolius]
XP_019442965.1	0.90321	1.04	1.04	2	PREDICTED: splicing factor U2af small subunit B-like [Lupinus angustifolius]
XP_019457106.1+OIW04282.1	0.90321	0.93	1.07	2	PREDICTED: heterogeneous nuclear ribonucleoprotein 1-like [Lupinus angustifolius] hypothetical protein TanjilG_00842 [Lupinus angustifolius]
XP_019415395.1	0.90321	1.02	1.02	7	PREDICTED: elongation factor-like GTPase 1 [Lupinus angustifolius]
XP_019439532.1	0.90326	0.94	1.06	4	PREDICTED: protein DJ-1 homolog D-like [Lupinus angustifolius]
XP_019431307.1+OIW20558.1	0.90326	1.17	1.17	2	PREDICTED: zinc finger CCCH domain-containing protein 48-like [Lupinus angustifolius] hypothetical protein TanjilG_14957 [Lupinus angustifolius]
XP_019446753.1+XP_019444723.1+XP_019424234.1	0.90326	0.94	1.06	2	PREDICTED: oxygen-evolving enhancer protein 1, chloroplastic-like [Lupinus angustifolius] PREDICTED: oxygen-evolving enhancer protein 1, chloroplastic-like [Lupinus angustifolius] PREDICTED: oxygen-evolving enhancer protein 1, chloroplastic [Lupinus angustifolius]
OIV99790.1+XP_019464152.1	0.90465	0.95	1.05	4	hypothetical protein TanjilG_26128 [Lupinus angustifolius] PREDICTED: afadin- and alpha-actinin-binding protein-like [Lupinus angustifolius]
OIV92821.1+XP_019423768.1	0.90465	0.96	1.04	7	hypothetical protein TanjilG_00955 [Lupinus angustifolius] PREDICTED: acetylornithine deacetylase-like [Lupinus angustifolius]
XP_019432162.1+OIW21023.1	0.90747	1.13	1.13	2	PREDICTED: protein GDAP2 homolog [Lupinus angustifolius] hypothetical protein TanjilG_27386 [Lupinus angustifolius]
XP_019432640.1+XP_019432638.1	0.90747	1.03	1.03	4	PREDICTED: probable inactive receptor kinase At1g48480 isoform X2 [Lupinus angustifolius] PREDICTED: probable inactive receptor kinase At1g48480 isoform X1 [Lupinus angustifolius]
XP_019456255.1	0.90747	1.00	1.00	3	PREDICTED: alkylated DNA repair protein alkB homolog 8 [Lupinus angustifolius]
XP_019457958.1+XP_019457955.1+OIW02954.1+XP_019457959.1+XP_019457954.1+XP_019457957.1	0.90747	0.93	1.07	3	PREDICTED: uncharacterized protein LOC109358270 isoform X4 [Lupinus angustifolius] PREDICTED: uncharacterized protein LOC109358270 isoform X2 [Lupinus angustifolius] hypothetical protein TanjilG_13591 [Lupinus angustifolius] PREDICTED: uncharacterized protein LOC109358270 isoform X5 [Lupinus angustifolius] PREDICTED: uncharacterized protein LOC109358270 isoform X1 [Lupinus angustifolius] PREDICTE…
OIW03940.1+XP_019458647.1	0.90747	1.02	1.02	2	hypothetical protein TanjilG_30216 [Lupinus angustifolius] PREDICTED: carbamoyl-phosphate synthase large chain, chloroplastic-like [Lupinus angustifolius]
OIW11651.1+XP_019443787.1	0.90747	0.92	1.09	7	hypothetical protein TanjilG_24857 [Lupinus angustifolius] PREDICTED: ruBisCO large subunit-binding protein subunit beta, chloroplastic [Lupinus angustifolius]
OIV91057.1+XP_019427469.1	0.90747	0.97	1.03	3	hypothetical protein TanjilG_17017 [Lupinus angustifolius] PREDICTED: glutamate--tRNA ligase, cytoplasmic-like [Lupinus angustifolius]
XP_019426623.1	0.90923	1.04	1.04	6	PREDICTED: basic 7S globulin 2-like [Lupinus angustifolius]
XP_019413579.1	0.90923	0.92	1.08	5	PREDICTED: ruBisCO large subunit-binding protein subunit alpha-like [Lupinus angustifolius]
XP_019465470.1+XP_019465468.1+XP_019465469.1+XP_019465467.1	0.90923	1.02	1.02	4	PREDICTED: splicing factor U2af large subunit A-like isoform X4 [Lupinus angustifolius] PREDICTED: splicing factor U2af large subunit B-like isoform X2 [Lupinus angustifolius] PREDICTED: splicing factor U2af large subunit B-like isoform X3 [Lupinus angustifolius] PREDICTED: splicing factor U2af large subunit B-like isoform X1 [Lupinus angustifolius]
XP_019465301.1+OIV99463.1	0.90923	0.92	1.09	5	PREDICTED: plastid division protein PDV2-like [Lupinus angustifolius] hypothetical protein TanjilG_17273 [Lupinus angustifolius]
XP_019413074.1	0.90923	0.89	1.13	2	PREDICTED: T-complex protein 1 subunit beta [Lupinus angustifolius]
XP_019446713.1	0.90923	0.93	1.08	2	PREDICTED: uncharacterized protein LOC109350050 [Lupinus angustifolius]
XP_019421313.1	0.90923	0.95	1.06	2	PREDICTED: DNA polymerase alpha catalytic subunit [Lupinus angustifolius]
XP_019423335.1	0.90943	0.99	1.01	3	PREDICTED: AP-4 complex subunit epsilon-like [Lupinus angustifolius]
XP_019461770.1	0.90943	0.88	1.14	2	PREDICTED: ferredoxin-A-like [Lupinus angustifolius]
XP_019463225.1+OIW01046.1	0.90943	1.04	1.04	2	PREDICTED: transforming growth factor-beta receptor-associated protein 1 [Lupinus angustifolius] hypothetical protein TanjilG_14229 [Lupinus angustifolius]
XP_019423390.1+XP_019444853.1	0.90943	0.94	1.07	7	PREDICTED: aconitate hydratase 1 [Lupinus angustifolius] PREDICTED: aconitate hydratase 1-like isoform X2 [Lupinus angustifolius]
OIW09652.1+XP_019446869.1	0.90950	1.02	1.02	3	hypothetical protein TanjilG_28251 [Lupinus angustifolius] PREDICTED: beta-galactosidase 3-like [Lupinus angustifolius]
XP_019442729.1+XP_019442728.1	0.90950	1.05	1.05	25	PREDICTED: alpha-1,4 glucan phosphorylase L isozyme, chloroplastic/amyloplastic isoform X2 [Lupinus angustifolius] PREDICTED: alpha-1,4 glucan phosphorylase L isozyme, chloroplastic/amyloplastic isoform X1 [Lupinus angustifolius]
XP_019461915.1+XP_019461916.1	0.90950	1.06	1.06	3	PREDICTED: xyloglucan galactosyltransferase KATAMARI1 homolog isoform X1 [Lupinus angustifolius] PREDICTED: xyloglucan galactosyltransferase KATAMARI1 homolog isoform X2 [Lupinus angustifolius]
XP_019434732.1	0.90950	0.95	1.05	2	PREDICTED: uncharacterized protein LOC109341312 [Lupinus angustifolius]
XP_019457976.1	0.90950	1.00	1.00	4	PREDICTED: golgin candidate 5-like [Lupinus angustifolius]
XP_019455721.1	0.90950	1.03	1.03	4	PREDICTED: internal alternative NAD(P)H-ubiquinone oxidoreductase A2, mitochondrial-like [Lupinus angustifolius]
XP_019430382.1	0.90978	0.99	1.01	3	PREDICTED: adenosine deaminase-like protein [Lupinus angustifolius]
XP_019440041.1	0.91055	0.95	1.05	2	PREDICTED: enhancer of mRNA-decapping protein 4-like [Lupinus angustifolius]
XP_019422502.1	0.91055	0.88	1.14	3	PREDICTED: proteasome subunit alpha type-7-like [Lupinus angustifolius]
XP_019449847.1	0.91055	1.05	1.05	4	PREDICTED: calreticulin-3-like [Lupinus angustifolius]
OIW09650.1+XP_019446871.1	0.91055	1.08	1.08	5	hypothetical protein TanjilG_28249 [Lupinus angustifolius] PREDICTED: probable serine protease EDA2 [Lupinus angustifolius]
XP_019453219.1+OIW06550.1+XP_019442773.1	0.91055	0.96	1.04	2	PREDICTED: ATP sulfurylase 2-like isoform X1 [Lupinus angustifolius] hypothetical protein TanjilG_29971 [Lupinus angustifolius] PREDICTED: ATP sulfurylase 2-like [Lupinus angustifolius]
XP_019429109.1+XP_019429110.1	0.91055	0.99	1.01	2	PREDICTED: DNA-(apurinic or apyrimidinic site) lyase, chloroplastic isoform X1 [Lupinus angustifolius] PREDICTED: DNA-(apurinic or apyrimidinic site) lyase, chloroplastic isoform X2 [Lupinus angustifolius]
XP_019459674.1+XP_019459675.1+XP_019428421.1	0.91084	0.98	1.02	3	PREDICTED: pre-mRNA-processing factor 17-like isoform X1 [Lupinus angustifolius] PREDICTED: pre-mRNA-processing factor 17-like isoform X2 [Lupinus angustifolius] PREDICTED: pre-mRNA-processing factor 17-like [Lupinus angustifolius]
XP_019439470.1	0.91084	0.93	1.07	2	PREDICTED: inositol 1,3,4-trisphosphate 5/6-kinase 4 [Lupinus angustifolius]
XP_019430234.1	0.91106	0.95	1.05	3	PREDICTED: 60S ribosomal protein L6-like [Lupinus angustifolius]
XP_019433793.1	0.91106	0.96	1.04	8	PREDICTED: glutathione reductase, cytosolic [Lupinus angustifolius]
OIW09979.1+XP_019446396.1	0.91106	1.04	1.04	4	hypothetical protein TanjilG_32719 [Lupinus angustifolius] PREDICTED: glucan endo-1,3-beta-glucosidase 13-like [Lupinus angustifolius]
XP_019451672.1	0.91150	1.04	1.04	6	PREDICTED: UDP-glucose 6-dehydrogenase 1-like [Lupinus angustifolius]
XP_019417006.1	0.91150	0.96	1.04	2	PREDICTED: signal peptide peptidase-like [Lupinus angustifolius]
XP_019434058.1+OIW21879.1	0.91150	1.28	1.28	2	PREDICTED: ATP-dependent helicase BRM-like [Lupinus angustifolius] hypothetical protein TanjilG_13761 [Lupinus angustifolius]
OIW02942.1+XP_019460194.1	0.91267	0.98	1.02	2	hypothetical protein TanjilG_29718 [Lupinus angustifolius] PREDICTED: calcium-dependent protein kinase 26-like isoform X1 [Lupinus angustifolius]
XP_019422619.1	0.91542	0.99	1.01	2	PREDICTED: protein N-lysine methyltransferase METTL21A-like [Lupinus angustifolius]
XP_019436709.1+XP_019443273.1+XP_019436710.1	0.91542	0.97	1.04	2	PREDICTED: cyclin-dependent kinase D-3-like isoform X1 [Lupinus angustifolius] PREDICTED: cyclin-dependent kinase D-3-like [Lupinus angustifolius] PREDICTED: cyclin-dependent kinase D-3-like isoform X2 [Lupinus angustifolius]
XP_019435514.1+XP_019435509.1+OIV89026.1	0.91542	0.97	1.04	3	PREDICTED: ubiquitin-activating enzyme E1 1-like isoform X3 [Lupinus angustifolius] PREDICTED: ubiquitin-activating enzyme E1 1-like isoform X1 [Lupinus angustifolius] hypothetical protein TanjilG_24096 [Lupinus angustifolius]
OIW12792.1+XP_019441623.1	0.91542	1.11	1.11	2	hypothetical protein TanjilG_24725 [Lupinus angustifolius] PREDICTED: methionine--tRNA ligase, chloroplastic/mitochondrial [Lupinus angustifolius]
XP_019419964.1	0.91607	0.91	1.10	3	PREDICTED: glutathione synthetase, chloroplastic-like [Lupinus angustifolius]
XP_019461260.1	0.91607	1.13	1.13	2	PREDICTED: transmembrane 9 superfamily member 12-like [Lupinus angustifolius]
BAC77064.1	0.91607	0.98	1.02	7	NADP-specific isocitrate dehydrogenase [Lupinus albus]
XP_019455536.1+OIW04551.1	0.91816	1.04	1.04	5	PREDICTED: pectinesterase-like [Lupinus angustifolius] hypothetical protein TanjilG_13933 [Lupinus angustifolius]
XP_019436508.1	0.91876	0.95	1.05	4	PREDICTED: eukaryotic initiation factor 4A-8 [Lupinus angustifolius]
OIW17904.1+XP_019461950.1+XP_019464729.1+OIW00374.1	0.91876	0.96	1.04	2	hypothetical protein TanjilG_19873 [Lupinus angustifolius] PREDICTED: actin-related protein 3 [Lupinus angustifolius] PREDICTED: actin-related protein 3-like [Lupinus angustifolius] hypothetical protein TanjilG_05724 [Lupinus angustifolius]
XP_019458054.1	0.91876	1.05	1.05	2	PREDICTED: peroxisomal fatty acid beta-oxidation multifunctional protein AIM1-like [Lupinus angustifolius]
XP_019446505.1	0.91876	0.95	1.05	3	PREDICTED: dynamin-related protein 5A-like [Lupinus angustifolius]
XP_019453070.1+XP_019453073.1	0.91876	1.10	1.10	2	PREDICTED: uncharacterized protein LOC109354794 isoform X1 [Lupinus angustifolius] PREDICTED: uncharacterized protein LOC109354794 isoform X2 [Lupinus angustifolius]
XP_019458646.1	0.91937	0.94	1.06	9	PREDICTED: U5 small nuclear ribonucleoprotein 40 kDa protein [Lupinus angustifolius]
XP_019429846.1+XP_019429843.1	0.91937	0.96	1.05	2	PREDICTED: protein decapping 5-like isoform X2 [Lupinus angustifolius] PREDICTED: protein decapping 5-like isoform X1 [Lupinus angustifolius]
XP_019435795.1+OIW16466.1	0.91937	1.02	1.02	2	PREDICTED: Niemann-Pick C1 protein-like [Lupinus angustifolius] hypothetical protein TanjilG_19182 [Lupinus angustifolius]
XP_019458371.1+XP_019458368.1	0.91953	1.02	1.02	3	PREDICTED: glyoxylate/succinic semialdehyde reductase 2, chloroplastic isoform X2 [Lupinus angustifolius] PREDICTED: glyoxylate/succinic semialdehyde reductase 2, chloroplastic isoform X1 [Lupinus angustifolius]
XP_019448398.1	0.91953	0.96	1.04	3	PREDICTED: protein phosphatase PP2A regulatory subunit A-like [Lupinus angustifolius]
XP_019420716.1+OIW17365.1+XP_019420720.1	0.91957	0.98	1.02	2	PREDICTED: katanin p80 WD40 repeat-containing subunit B1 homolog isoform X1 [Lupinus angustifolius] hypothetical protein TanjilG_22477 [Lupinus angustifolius] PREDICTED: katanin p80 WD40 repeat-containing subunit B1 homolog isoform X2 [Lupinus angustifolius]
XP_019433932.1+OIW21825.1+XP_019433930.1	0.91957	1.04	1.04	3	PREDICTED: 3-isopropylmalate dehydratase large subunit, chloroplastic-like isoform X3 [Lupinus angustifolius] hypothetical protein TanjilG_12272 [Lupinus angustifolius] PREDICTED: 3-isopropylmalate dehydratase large subunit, chloroplastic-like isoform X1 [Lupinus angustifolius]
XP_019459409.1	0.91957	0.92	1.08	3	PREDICTED: 50S ribosomal protein L12, chloroplastic-like [Lupinus angustifolius]
OIW10148.1+XP_019422535.1+XP_019445734.1+OIV93225.1+XP_019422537.1	0.91957	1.00	1.00	2	hypothetical protein TanjilG_27899 [Lupinus angustifolius] PREDICTED: uncharacterized protein LOC109332144 isoform X1 [Lupinus angustifolius] PREDICTED: uncharacterized protein LOC109349404 [Lupinus angustifolius] hypothetical protein TanjilG_27404 [Lupinus angustifolius] PREDICTED: uncharacterized protein LOC109332144 isoform X2 [Lupinus angustifolius]
XP_019420943.1	0.91957	0.94	1.07	2	PREDICTED: probable beta-D-xylosidase 6 [Lupinus angustifolius]
OIV91181.1+XP_019428059.1	0.91986	1.03	1.03	16	hypothetical protein TanjilG_30403 [Lupinus angustifolius] PREDICTED: phosphoglucan, water dikinase, chloroplastic [Lupinus angustifolius]
XP_019413787.1	0.91986	0.96	1.04	4	PREDICTED: probable 37S ribosomal protein S5, mitochondrial [Lupinus angustifolius]
XP_019415516.1+XP_019438524.1	0.91986	0.96	1.05	4	PREDICTED: 14-3-3-like protein [Lupinus angustifolius] PREDICTED: 14-3-3-like protein [Lupinus angustifolius]
XP_019413947.1	0.91986	0.96	1.04	6	PREDICTED: uncharacterized protein LOC109325824 [Lupinus angustifolius]
XP_019435580.1	0.91986	0.91	1.10	3	PREDICTED: guanine nucleotide-binding protein-like NSN1 [Lupinus angustifolius]
XP_019423449.1+XP_019423448.1	0.91986	0.98	1.02	3	PREDICTED: probable RNA helicase SDE3 isoform X2 [Lupinus angustifolius] PREDICTED: probable RNA helicase SDE3 isoform X1 [Lupinus angustifolius]
OIV99641.1+XP_019413640.1+XP_019413639.1	0.91986	1.00	1.00	3	hypothetical protein TanjilG_17451 [Lupinus angustifolius] PREDICTED: DNA-directed RNA polymerase III subunit 2 isoform X2 [Lupinus angustifolius] PREDICTED: DNA-directed RNA polymerase III subunit 2 isoform X1 [Lupinus angustifolius]
XP_019430954.1	0.91986	0.96	1.04	10	PREDICTED: hydroxyacylglutathione hydrolase cytoplasmic [Lupinus angustifolius]
XP_019419514.1	0.91986	1.00	1.00	5	PREDICTED: conserved oligomeric Golgi complex subunit 4-like [Lupinus angustifolius]
XP_019434480.1+OIV89511.1	0.92038	1.04	1.04	3	PREDICTED: rRNA biogenesis protein RRP5 isoform X1 [Lupinus angustifolius] hypothetical protein TanjilG_20430 [Lupinus angustifolius]
XP_019422364.1	0.92038	1.04	1.04	8	PREDICTED: paladin-like [Lupinus angustifolius]
XP_019454824.1	0.92038	0.92	1.09	3	PREDICTED: glutaredoxin [Lupinus angustifolius]
XP_019428390.1+OIV90775.1	0.92038	1.03	1.03	2	PREDICTED: serine/threonine protein phosphatase 2A regulatory subunit B''beta-like [Lupinus angustifolius] hypothetical protein TanjilG_15508 [Lupinus angustifolius]
OIW19665.1+XP_019438899.1	0.92048	1.08	1.08	2	hypothetical protein TanjilG_18475 [Lupinus angustifolius] PREDICTED: glycerophosphodiester phosphodiesterase GDPD6 [Lupinus angustifolius]
XP_019428009.1+XP_019428008.1+XP_019428007.1	0.92048	0.93	1.08	6	PREDICTED: uncharacterized protein At5g39570-like isoform X3 [Lupinus angustifolius] PREDICTED: uncharacterized protein At5g39570-like isoform X2 [Lupinus angustifolius] PREDICTED: uncharacterized protein At5g39570-like isoform X1 [Lupinus angustifolius]
OIV90072.1+XP_019427614.1	0.92048	1.03	1.03	2	hypothetical protein TanjilG_01526 [Lupinus angustifolius] PREDICTED: uncharacterized protein LOC109335847 [Lupinus angustifolius]
OIW18996.1+XP_019447286.1	0.92070	1.03	1.03	2	hypothetical protein TanjilG_20269 [Lupinus angustifolius] PREDICTED: brefeldin A-inhibited guanine nucleotide-exchange protein 2-like [Lupinus angustifolius]
XP_019429802.1	0.92070	1.02	1.02	7	PREDICTED: coatomer subunit beta-1-like [Lupinus angustifolius]
OIW17350.1+XP_019420583.1+XP_019420590.1	0.92089	1.01	1.01	3	hypothetical protein TanjilG_22462 [Lupinus angustifolius] PREDICTED: uncharacterized protein LOC109330754 isoform X1 [Lupinus angustifolius] PREDICTED: titin homolog isoform X2 [Lupinus angustifolius]
XP_019455526.1	0.92089	1.09	1.09	29	PREDICTED: brefeldin A-inhibited guanine nucleotide-exchange protein 5-like isoform X4 [Lupinus angustifolius]
XP_019447916.1	0.92262	1.03	1.03	2	PREDICTED: probable trans-2-enoyl-CoA reductase, mitochondrial [Lupinus angustifolius]
XP_019419424.1+XP_019419425.1	0.92262	0.95	1.05	2	PREDICTED: RNA-binding protein BRN1-like isoform X1 [Lupinus angustifolius] PREDICTED: RNA-binding protein BRN1-like isoform X2 [Lupinus angustifolius]
XP_019458884.1	0.92262	1.06	1.06	11	PREDICTED: GDSL esterase/lipase At5g14450 [Lupinus angustifolius]
XP_019439773.1	0.92262	0.97	1.03	5	PREDICTED: endo-1,3;1,4-beta-D-glucanase-like isoform X1 [Lupinus angustifolius]
XP_019428099.1	0.92273	0.94	1.06	3	PREDICTED: mitochondrial import receptor subunit TOM20-like [Lupinus angustifolius]
XP_019442307.1	0.92297	0.97	1.04	2	PREDICTED: (DL)-glycerol-3-phosphatase 2-like [Lupinus angustifolius]
XP_019436299.1	0.92322	1.07	1.07	4	PREDICTED: vacuolar protein sorting-associated protein 41 homolog [Lupinus angustifolius]
XP_019458433.1+XP_019448106.1+XP_019443401.1	0.92322	0.88	1.14	3	PREDICTED: ADP,ATP carrier protein 1, chloroplastic-like [Lupinus angustifolius] PREDICTED: plastidic ATP/ADP-transporter-like [Lupinus angustifolius] PREDICTED: ADP,ATP carrier protein 1, chloroplastic-like [Lupinus angustifolius]
OIW16477.1+XP_019432200.1	0.92322	1.05	1.05	7	hypothetical protein TanjilG_32147 [Lupinus angustifolius] PREDICTED: E3 ubiquitin-protein ligase listerin [Lupinus angustifolius]
XP_019417543.1	0.92359	1.24	1.24	3	PREDICTED: cytokinin dehydrogenase 3-like [Lupinus angustifolius]
XP_019428305.1+XP_019428304.1+XP_019461648.1+XP_019461646.1+XP_019428307.1+XP_019428306.1	0.92359	0.95	1.06	2	PREDICTED: phosphatidate phosphatase PAH1-like isoform X2 [Lupinus angustifolius] PREDICTED: phosphatidate phosphatase PAH1-like isoform X1 [Lupinus angustifolius] PREDICTED: phosphatidate phosphatase PAH1-like isoform X2 [Lupinus angustifolius] PREDICTED: phosphatidate phosphatase PAH1-like isoform X1 [Lupinus angustifolius] PREDICTED: phosphatidate phosphatase PAH1-like isoform X4 [Lupinus angu…
XP_019423441.1+OIV93731.1	0.92359	1.00	1.00	6	PREDICTED: 2-methylene-furan-3-one reductase [Lupinus angustifolius] hypothetical protein TanjilG_16582 [Lupinus angustifolius]
XP_019464127.1	0.92382	0.94	1.06	3	PREDICTED: uncharacterized protein LOC109362637 [Lupinus angustifolius]
OIV99652.1+XP_019413101.1	0.92382	1.04	1.04	3	hypothetical protein TanjilG_17462 [Lupinus angustifolius] PREDICTED: DNA topoisomerase 1 alpha-like isoform X1 [Lupinus angustifolius]
XP_019417324.1	0.92382	0.94	1.07	2	PREDICTED: GEM-like protein 1 isoform X1 [Lupinus angustifolius]
OIW02393.1+XP_019461481.1	0.92538	0.97	1.03	8	hypothetical protein TanjilG_04986 [Lupinus angustifolius] PREDICTED: probable beta-D-xylosidase 7 [Lupinus angustifolius]
XP_019437104.1	0.92538	1.10	1.10	2	PREDICTED: E3 ubiquitin-protein ligase KEG-like [Lupinus angustifolius]
XP_019444911.1	0.92538	1.03	1.03	8	PREDICTED: peroxidase 51-like [Lupinus angustifolius]
XP_019443446.1	0.92538	0.85	1.18	2	PREDICTED: uncharacterized protein LOC109347824 [Lupinus angustifolius]
XP_019452465.1+OIW06870.1	0.92538	1.01	1.01	3	PREDICTED: ribosome biogenesis protein BOP1 homolog [Lupinus angustifolius] hypothetical protein TanjilG_19519 [Lupinus angustifolius]
XP_019413182.1	0.92561	1.06	1.06	7	PREDICTED: 4-hydroxy-3-methylbut-2-enyl diphosphate reductase, chloroplastic-like [Lupinus angustifolius]
OIW19761.1+XP_019437287.1+XP_019437317.1	0.92561	1.00	1.00	6	hypothetical protein TanjilG_27300 [Lupinus angustifolius] PREDICTED: pyruvate, phosphate dikinase 2 isoform X1 [Lupinus angustifolius] PREDICTED: pyruvate, phosphate dikinase 2 isoform X2 [Lupinus angustifolius]
OIV99680.1+XP_019413985.1+XP_019413986.1	0.92561	1.05	1.05	2	hypothetical protein TanjilG_17490 [Lupinus angustifolius] PREDICTED: peptidyl-prolyl cis-trans isomerase FKBP42 isoform X1 [Lupinus angustifolius] PREDICTED: peptidyl-prolyl cis-trans isomerase FKBP42 isoform X2 [Lupinus angustifolius]
XP_019450295.1	0.92561	0.99	1.01	2	PREDICTED: acetyl-coenzyme A carboxylase carboxyl transferase subunit alpha, chloroplastic-like [Lupinus angustifolius]
XP_019416734.1+XP_019437722.1	0.92572	1.00	1.00	4	PREDICTED: DEAD-box ATP-dependent RNA helicase 56-like [Lupinus angustifolius] PREDICTED: DEAD-box ATP-dependent RNA helicase 56-like [Lupinus angustifolius]
XP_019449848.1	0.92572	0.94	1.06	5	PREDICTED: ER membrane protein complex subunit 10 [Lupinus angustifolius]
XP_019417066.1+XP_019417065.1+XP_019417063.1+XP_019417064.1	0.92572	0.93	1.08	2	PREDICTED: nuclear pore complex protein NUP205-like isoform X4 [Lupinus angustifolius] PREDICTED: nuclear pore complex protein NUP205-like isoform X3 [Lupinus angustifolius] PREDICTED: nuclear pore complex protein NUP205-like isoform X1 [Lupinus angustifolius] PREDICTED: nuclear pore complex protein NUP205-like isoform X2 [Lupinus angustifolius]
OIW08867.1	0.92572	1.03	1.03	3	hypothetical protein TanjilG_05842 [Lupinus angustifolius]
OIW16163.1+XP_019433211.1	0.92583	0.99	1.01	2	hypothetical protein TanjilG_18878 [Lupinus angustifolius] PREDICTED: serine/threonine-protein phosphatase PP1 isozyme 4 [Lupinus angustifolius]
XP_019449591.1	0.92619	1.00	1.00	4	PREDICTED: carotenoid 9,10(9',10')-cleavage dioxygenase 1 isoform X1 [Lupinus angustifolius]
XP_019422998.1+XP_019423001.1+XP_019423012.1+OIW17494.1+XP_019423010.1+XP_019423007.1+XP_019423030.1+XP_019423018.1+XP_019423023.1+XP_019423026.1	0.92619	1.03	1.03	4	PREDICTED: acyl-CoA-binding domain-containing protein 4-like isoform X1 [Lupinus angustifolius] PREDICTED: acyl-CoA-binding domain-containing protein 4-like isoform X2 [Lupinus angustifolius] PREDICTED: acyl-CoA-binding domain-containing protein 4-like isoform X5 [Lupinus angustifolius] hypothetical protein TanjilG_22606 [Lupinus angustifolius] PREDICTED: acyl-CoA-binding domain-containing protei…
XP_019413945.1+XP_019453819.1	0.92619	0.99	1.01	4	PREDICTED: dnaJ protein homolog ANJ1-like [Lupinus angustifolius] PREDICTED: dnaJ protein homolog ANJ1-like isoform X1 [Lupinus angustifolius]
XP_019428662.1	0.92644	1.03	1.03	3	PREDICTED: probable polygalacturonase [Lupinus angustifolius]
XP_019452924.1	0.92644	0.99	1.01	2	PREDICTED: serine/threonine protein phosphatase 2A regulatory subunit B''beta-like [Lupinus angustifolius]
OIW13476.1+XP_019440603.1	0.92644	1.03	1.03	3	hypothetical protein TanjilG_01044 [Lupinus angustifolius] PREDICTED: topless-related protein 3-like [Lupinus angustifolius]
OIW00860.1+XP_019464529.1	0.92644	0.90	1.11	2	hypothetical protein TanjilG_12801 [Lupinus angustifolius] PREDICTED: uncharacterized protein At5g01610-like [Lupinus angustifolius]
XP_019448164.1+OIW09107.1	0.92644	0.87	1.15	3	PREDICTED: zinc phosphodiesterase ELAC protein 2 [Lupinus angustifolius] hypothetical protein TanjilG_16334 [Lupinus angustifolius]
AAA50160.1+AAA33408.1+XP_019438405.1	0.92666	1.11	1.11	14	aspartate aminotransferase P1 [Lupinus angustifolius] aspartate aminotransferase P1 [Lupinus angustifolius] PREDICTED: aspartate aminotransferase 1 [Lupinus angustifolius]
XP_019442850.1+XP_019454338.1+XP_019426769.1	0.92666	1.01	1.01	17	PREDICTED: proteasome subunit alpha type-3-like [Lupinus angustifolius] PREDICTED: proteasome subunit alpha type-3 [Lupinus angustifolius] PREDICTED: proteasome subunit alpha type-3-like [Lupinus angustifolius]
XP_019442907.1+XP_019459285.1	0.92679	1.03	1.03	4	PREDICTED: 40S ribosomal protein S27-2 [Lupinus angustifolius] PREDICTED: 40S ribosomal protein S27-2-like [Lupinus angustifolius]
XP_019448078.1	0.92679	1.00	1.00	2	PREDICTED: protein SLOW GREEN 1, chloroplastic-like [Lupinus angustifolius]
XP_019413701.1+XP_019425458.1+XP_019425460.1	0.92679	1.16	1.16	3	PREDICTED: cellulose synthase A catalytic subunit 3 [UDP-forming]-like [Lupinus angustifolius] PREDICTED: cellulose synthase A catalytic subunit 3 [UDP-forming] isoform X1 [Lupinus angustifolius] PREDICTED: cellulose synthase A catalytic subunit 3 [UDP-forming] isoform X2 [Lupinus angustifolius]
XP_019448044.1+XP_019448042.1+XP_019448041.1+XP_019448043.1	0.92679	0.84	1.19	2	PREDICTED: histone deacetylase HDT1-like isoform X4 [Lupinus angustifolius] PREDICTED: histone deacetylase HDT1-like isoform X2 [Lupinus angustifolius] PREDICTED: histone deacetylase HDT1-like isoform X1 [Lupinus angustifolius] PREDICTED: histone deacetylase HDT1-like isoform X3 [Lupinus angustifolius]
XP_019444820.1	0.92679	0.86	1.16	4	PREDICTED: SKP1-like protein 1A [Lupinus angustifolius]
XP_019458742.1	0.92725	0.99	1.01	2	PREDICTED: protein SRC1-like [Lupinus angustifolius]
XP_019443475.1	0.92725	1.03	1.03	4	PREDICTED: 60S ribosomal protein L28-2-like [Lupinus angustifolius]
XP_019453669.1	0.92725	0.97	1.03	6	PREDICTED: probable alpha,alpha-trehalose-phosphate synthase [UDP-forming] 7 [Lupinus angustifolius]
XP_019452838.1	0.92759	0.93	1.08	4	PREDICTED: stem-specific protein TSJT1-like [Lupinus angustifolius]
XP_019429762.1+XP_019429760.1	0.92759	0.93	1.08	5	PREDICTED: protein SUPPRESSOR OF GENE SILENCING 3-like isoform X2 [Lupinus angustifolius] PREDICTED: protein SUPPRESSOR OF GENE SILENCING 3-like isoform X1 [Lupinus angustifolius]
OIW20922.1	0.92759	0.95	1.05	6	hypothetical protein TanjilG_25728 [Lupinus angustifolius]
XP_019449102.1	0.92759	1.03	1.03	2	PREDICTED: electron transfer flavoprotein subunit alpha, mitochondrial [Lupinus angustifolius]
XP_019440317.1+OIW13653.1	0.92771	1.03	1.03	2	PREDICTED: uncharacterized protein At3g49720-like [Lupinus angustifolius] hypothetical protein TanjilG_07995 [Lupinus angustifolius]
XP_019437759.1	0.92771	1.09	1.09	3	PREDICTED: ER membrane protein complex subunit 7 homolog isoform X2 [Lupinus angustifolius]
XP_019460497.1+OIW02928.1	0.93068	1.06	1.06	9	PREDICTED: neutral ceramidase-like isoform X1 [Lupinus angustifolius] hypothetical protein TanjilG_29704 [Lupinus angustifolius]
OIW01845.1+XP_019461454.1	0.93068	1.01	1.01	3	hypothetical protein TanjilG_15709 [Lupinus angustifolius] PREDICTED: chaperone protein ClpB3, chloroplastic [Lupinus angustifolius]
OIW10320.1+XP_019446006.1+XP_019446004.1	0.93112	0.85	1.17	3	hypothetical protein TanjilG_28071 [Lupinus angustifolius] PREDICTED: lon protease homolog 2, peroxisomal-like isoform X3 [Lupinus angustifolius] PREDICTED: lon protease homolog 2, peroxisomal-like isoform X1 [Lupinus angustifolius]
XP_019440804.1	0.93112	1.09	1.09	4	PREDICTED: uncharacterized protein C18orf8 [Lupinus angustifolius]
XP_019422379.1	0.93112	0.96	1.04	5	PREDICTED: protein SGT1 homolog B-like [Lupinus angustifolius]
XP_019446070.1	0.93112	1.11	1.11	4	PREDICTED: peroxisomal acyl-coenzyme A oxidase 1-like [Lupinus angustifolius]
XP_019456370.1	0.93112	1.03	1.03	2	PREDICTED: cinnamoyl-CoA reductase 1-like [Lupinus angustifolius]
XP_019423957.1	0.93194	1.01	1.01	2	PREDICTED: probable carotenoid cleavage dioxygenase 4, chloroplastic [Lupinus angustifolius]
XP_019413515.1	0.93194	1.06	1.06	2	PREDICTED: tetraketide alpha-pyrone reductase 1-like isoform X1 [Lupinus angustifolius]
OIW01421.1	0.93293	0.95	1.05	6	hypothetical protein TanjilG_25717 [Lupinus angustifolius]
OIW19444.1+XP_019442232.1+XP_019454046.1	0.93293	1.16	1.16	2	hypothetical protein TanjilG_09464 [Lupinus angustifolius] PREDICTED: ADP-ribosylation factor 1-like isoform X1 [Lupinus angustifolius] PREDICTED: ADP-ribosylation factor 1 [Lupinus angustifolius]
XP_019446451.1	0.93293	0.98	1.02	3	PREDICTED: dirigent protein 19-like [Lupinus angustifolius]
XP_019414791.1+OIV98016.1+XP_019414790.1	0.93293	0.96	1.04	6	PREDICTED: glutamate synthase [NADH], amyloplastic isoform X2 [Lupinus angustifolius] hypothetical protein TanjilG_21726 [Lupinus angustifolius] PREDICTED: glutamate synthase [NADH], amyloplastic isoform X1 [Lupinus angustifolius]
XP_019440605.1	0.93306	0.96	1.05	2	PREDICTED: glycylpeptide N-tetradecanoyltransferase 1-like [Lupinus angustifolius]
XP_019438724.1+OIW14418.1+XP_019438722.1	0.93366	1.07	1.07	2	PREDICTED: protein argonaute 16 isoform X2 [Lupinus angustifolius] hypothetical protein TanjilG_20864 [Lupinus angustifolius] PREDICTED: protein argonaute 16 isoform X1 [Lupinus angustifolius]
OIW16086.1+XP_019429204.1+XP_019429205.1+XP_019429203.1	0.93366	0.99	1.01	8	hypothetical protein TanjilG_00043 [Lupinus angustifolius] PREDICTED: probable lactoylglutathione lyase, chloroplastic isoform X2 [Lupinus angustifolius] PREDICTED: probable lactoylglutathione lyase, chloroplastic isoform X3 [Lupinus angustifolius] PREDICTED: probable lactoylglutathione lyase, chloroplastic isoform X1 [Lupinus angustifolius]
XP_019438601.1	0.93366	0.99	1.01	16	PREDICTED: UDP-sugar pyrophosphorylase 1 [Lupinus angustifolius]
XP_019419398.1	0.93366	1.00	1.00	4	PREDICTED: heat shock 70 kDa protein, mitochondrial [Lupinus angustifolius]
XP_019429357.1+XP_019429354.1+XP_019429358.1+OIW17047.1+XP_019429355.1	0.93366	1.12	1.12	2	PREDICTED: glutamic acid-rich protein-like isoform X4 [Lupinus angustifolius] PREDICTED: protein DEK-like isoform X1 [Lupinus angustifolius] PREDICTED: protein DEK-like isoform X5 [Lupinus angustifolius] hypothetical protein TanjilG_00186 [Lupinus angustifolius] PREDICTED: protein DEK-like isoform X2 [Lupinus angustifolius]
OIV94974.1+XP_019421373.1+XP_019421372.1	0.93392	0.98	1.02	5	hypothetical protein TanjilG_22171 [Lupinus angustifolius] PREDICTED: stromal processing peptidase, chloroplastic-like isoform X2 [Lupinus angustifolius] PREDICTED: stromal processing peptidase, chloroplastic-like isoform X1 [Lupinus angustifolius]
XP_019448711.1	0.93392	0.83	1.20	2	PREDICTED: proteasome subunit beta type-4-like [Lupinus angustifolius]
AAC49902.1+XP_019428519.1	0.93392	0.96	1.04	2	diadenosine 5',5'''-P1,P4-tetraphosphate hydrolase [Lupinus angustifolius] PREDICTED: nudix hydrolase 26, chloroplastic-like [Lupinus angustifolius]
XP_019446235.1+OIW10073.1	0.93392	1.01	1.01	3	PREDICTED: endoglucanase 8 [Lupinus angustifolius] hypothetical protein TanjilG_32813 [Lupinus angustifolius]
XP_019449896.1	0.93392	0.99	1.01	2	PREDICTED: stem-specific protein TSJT1-like [Lupinus angustifolius]
XP_019422066.1+XP_019429509.1	0.93392	1.01	1.01	5	PREDICTED: peroxidase 73-like [Lupinus angustifolius] PREDICTED: peroxidase 51-like [Lupinus angustifolius]
XP_019443309.1	0.93392	1.00	1.00	5	PREDICTED: ATP phosphoribosyltransferase 1, chloroplastic-like isoform X1 [Lupinus angustifolius]
XP_019419203.1+XP_019419202.1	0.93403	1.04	1.04	10	PREDICTED: spermatogenesis-associated protein 20 isoform X2 [Lupinus angustifolius] PREDICTED: spermatogenesis-associated protein 20 isoform X1 [Lupinus angustifolius]
XP_019417813.1	0.93403	0.96	1.05	2	PREDICTED: coumaroyl-CoA:anthocyanidin 3-O-glucoside-6''-O-coumaroyltransferase 1-like [Lupinus angustifolius]
XP_019428529.1	0.93403	0.96	1.04	2	PREDICTED: DNA repair RAD52-like protein 2, chloroplastic [Lupinus angustifolius]
XP_019414007.1+XP_019449690.1	0.93403	1.05	1.05	2	PREDICTED: putative septum site-determining protein minD homolog, chloroplastic [Lupinus angustifolius] PREDICTED: putative septum site-determining protein minD homolog, chloroplastic [Lupinus angustifolius]
XP_019444263.1	0.93416	1.08	1.08	2	PREDICTED: 2-Cys peroxiredoxin BAS1, chloroplastic-like [Lupinus angustifolius]
XP_019426897.1	0.93416	1.05	1.05	2	PREDICTED: uncharacterized protein LOC109335234 [Lupinus angustifolius]
XP_019413716.1	0.93445	0.94	1.07	7	PREDICTED: T-complex protein 1 subunit epsilon-like [Lupinus angustifolius]
XP_019461685.1	0.93445	0.99	1.01	3	PREDICTED: reticulocalbin-2-like [Lupinus angustifolius]
OIW11907.1+XP_019443405.1	0.93445	0.93	1.07	2	hypothetical protein TanjilG_18180, partial [Lupinus angustifolius] PREDICTED: N-alpha-acetyltransferase 15, NatA auxiliary subunit-like [Lupinus angustifolius]
XP_019425719.1	0.93445	1.03	1.03	2	PREDICTED: receptor-like protein kinase THESEUS 1 [Lupinus angustifolius]
XP_019437692.1+XP_019437693.1	0.93445	0.90	1.11	2	PREDICTED: probable protein phosphatase 2C 22 isoform X1 [Lupinus angustifolius] PREDICTED: probable protein phosphatase 2C 22 isoform X2 [Lupinus angustifolius]
XP_019415186.1+OIV98208.1	0.93446	0.94	1.07	7	PREDICTED: pantothenate kinase 2-like [Lupinus angustifolius] hypothetical protein TanjilG_28721 [Lupinus angustifolius]
XP_019430519.1	0.93446	0.98	1.02	5	PREDICTED: ubiquitin-activating enzyme E1 1-like [Lupinus angustifolius]
XP_019426114.1+XP_019426115.1	0.93446	0.93	1.08	2	PREDICTED: GBF-interacting protein 1-like isoform X1 [Lupinus angustifolius] PREDICTED: GBF-interacting protein 1-like isoform X2 [Lupinus angustifolius]
XP_019440987.1	0.93486	1.02	1.02	8	PREDICTED: pyruvate kinase 1, cytosolic-like [Lupinus angustifolius]
XP_019456011.1	0.93486	1.03	1.03	5	PREDICTED: adenylyltransferase and sulfurtransferase MOCS3 [Lupinus angustifolius]
XP_019421975.1	0.93486	0.94	1.06	6	PREDICTED: porphobilinogen deaminase, chloroplastic-like [Lupinus angustifolius]
XP_019462260.1+XP_019422247.1+XP_019428122.1+OIW02144.1+XP_019462261.1+XP_019455662.1	0.93486	1.38	1.38	5	PREDICTED: 60S ribosomal protein L34-like [Lupinus angustifolius] PREDICTED: 60S ribosomal protein L34-like [Lupinus angustifolius] PREDICTED: 60S ribosomal protein L34-like [Lupinus angustifolius] hypothetical protein TanjilG_06739 [Lupinus angustifolius] PREDICTED: 60S ribosomal protein L34-like [Lupinus angustifolius] PREDICTED: 60S ribosomal protein L34 [Lupinus angustifolius]
XP_019452377.1	0.93486	0.95	1.06	3	PREDICTED: plant UBX domain-containing protein 10-like [Lupinus angustifolius]
OIV97701.1+XP_019415643.1	0.93526	0.99	1.01	8	hypothetical protein TanjilG_12458 [Lupinus angustifolius] PREDICTED: omega-amidase, chloroplastic [Lupinus angustifolius]
XP_019446619.1	0.93526	0.94	1.06	4	PREDICTED: probable glutathione peroxidase 8 [Lupinus angustifolius]
XP_019434193.1+XP_019434192.1	0.93553	1.04	1.04	6	PREDICTED: acetyl-coenzyme A synthetase, chloroplastic/glyoxysomal-like isoform X2 [Lupinus angustifolius] PREDICTED: acetyl-coenzyme A synthetase, chloroplastic/glyoxysomal-like isoform X1 [Lupinus angustifolius]
XP_019444040.1	0.93567	0.87	1.14	2	PREDICTED: cytoplasmic tRNA 2-thiolation protein 2 [Lupinus angustifolius]
XP_019423162.1	0.93567	1.01	1.01	8	PREDICTED: serine/threonine-protein phosphatase PP2A catalytic subunit-like [Lupinus angustifolius]
XP_019462341.1	0.93608	0.99	1.01	4	PREDICTED: glutathione reductase, cytosolic-like isoform X1 [Lupinus angustifolius]
OIW04657.1+XP_019456560.1	0.93608	1.06	1.06	2	hypothetical protein TanjilG_07792 [Lupinus angustifolius] PREDICTED: uncharacterized protein LOC109357221 isoform X1 [Lupinus angustifolius]
XP_019456186.1+XP_019454870.1	0.93740	0.94	1.06	4	PREDICTED: eukaryotic translation initiation factor 5-like [Lupinus angustifolius] PREDICTED: eukaryotic translation initiation factor 5-like [Lupinus angustifolius]
XP_019419367.1+XP_019419364.1	0.93779	1.03	1.03	2	PREDICTED: kinesin-like protein KIN-13A isoform X2 [Lupinus angustifolius] PREDICTED: kinesin-like protein KIN-13A isoform X1 [Lupinus angustifolius]
XP_019444017.1+XP_019444020.1+XP_019444018.1+XP_019444015.1+XP_019444019.1	0.93779	0.87	1.14	2	PREDICTED: uncharacterized protein LOC109348193 isoform X2 [Lupinus angustifolius] PREDICTED: uncharacterized protein LOC109348193 isoform X5 [Lupinus angustifolius] PREDICTED: uncharacterized protein LOC109348193 isoform X3 [Lupinus angustifolius] PREDICTED: uncharacterized protein LOC109348193 isoform X1 [Lupinus angustifolius] PREDICTED: uncharacterized protein LOC109348193 isoform X4 [Lupinus…
XP_019463126.1	0.93779	0.91	1.10	7	PREDICTED: uncharacterized protein LOC109362007 [Lupinus angustifolius]
XP_019440451.1+XP_019440443.1+XP_019440434.1+XP_019440415.1	0.93779	1.06	1.06	2	PREDICTED: topless-related protein 4-like isoform X4 [Lupinus angustifolius] PREDICTED: topless-related protein 4-like isoform X3 [Lupinus angustifolius] PREDICTED: topless-related protein 4-like isoform X2 [Lupinus angustifolius] PREDICTED: topless-related protein 4-like isoform X1 [Lupinus angustifolius]
XP_019425876.1	0.93779	1.12	1.12	6	PREDICTED: glutamine synthetase leaf isozyme, chloroplastic [Lupinus angustifolius]
XP_019426584.1	0.93860	1.07	1.07	4	PREDICTED: probable pectinesterase/pectinesterase inhibitor 41 [Lupinus angustifolius]
XP_019461241.1+XP_019461240.1+OIW02770.1	0.93860	1.01	1.01	9	PREDICTED: ubiquitin carboxyl-terminal hydrolase 12-like isoform X2 [Lupinus angustifolius] PREDICTED: ubiquitin carboxyl-terminal hydrolase 12-like isoform X1 [Lupinus angustifolius] hypothetical protein TanjilG_29546 [Lupinus angustifolius]
XP_019439330.1	0.93898	0.93	1.07	2	PREDICTED: methyltransferase-like protein 13 [Lupinus angustifolius]
OIV97883.1+XP_019415322.1	0.93898	1.04	1.04	2	hypothetical protein TanjilG_12640 [Lupinus angustifolius] PREDICTED: F-box protein At1g78280 [Lupinus angustifolius]
XP_019449257.1	0.93951	0.96	1.04	2	PREDICTED: probable glutathione S-transferase [Lupinus angustifolius]
XP_019427324.1+OIV91483.1	0.93951	1.01	1.01	2	PREDICTED: uncharacterized protein LOC109335627 isoform X1 [Lupinus angustifolius] hypothetical protein TanjilG_02101 [Lupinus angustifolius]
XP_019424241.1	0.93951	0.93	1.07	3	PREDICTED: zinc finger protein ZPR1-like [Lupinus angustifolius]
OIW00988.1+XP_019463953.1	0.93974	1.01	1.01	3	hypothetical protein TanjilG_16237 [Lupinus angustifolius] PREDICTED: ras-related protein RABD2a-like [Lupinus angustifolius]
XP_019435499.1+OIW16343.1	0.93974	0.99	1.01	2	PREDICTED: purple acid phosphatase 18-like isoform X1 [Lupinus angustifolius] hypothetical protein TanjilG_19059 [Lupinus angustifolius]
XP_019450859.1	0.93974	0.99	1.01	15	PREDICTED: conserved oligomeric Golgi complex subunit 7 [Lupinus angustifolius]
XP_019428547.1+OIW06436.1+XP_019453025.1	0.93974	0.97	1.03	2	PREDICTED: AUGMIN subunit 6-like isoform X1 [Lupinus angustifolius] hypothetical protein TanjilG_05207 [Lupinus angustifolius] PREDICTED: AUGMIN subunit 6-like [Lupinus angustifolius]
XP_019450931.1	0.93974	0.94	1.06	7	PREDICTED: photosystem II stability/assembly factor HCF136, chloroplastic [Lupinus angustifolius]
XP_019429423.1	0.93974	1.10	1.10	2	PREDICTED: protein LUTEIN DEFICIENT 5, chloroplastic [Lupinus angustifolius]
XP_019428016.1	0.93974	1.01	1.01	4	PREDICTED: ALG-2 interacting protein X-like [Lupinus angustifolius]
XP_019434315.1+XP_019459086.1+OIW02091.1+XP_019459311.1	0.93974	1.04	1.04	4	PREDICTED: probable methyltransferase PMT13 [Lupinus angustifolius] PREDICTED: probable methyltransferase PMT13 [Lupinus angustifolius] hypothetical protein TanjilG_14790 [Lupinus angustifolius] PREDICTED: probable methyltransferase PMT13 [Lupinus angustifolius]
YP_009127521.1+AQV09747.1+YP_009446162.1+AQV09664.1+YP_008963596.1	0.93974	0.95	1.06	2	RNA polymerase beta (chloroplast) [Lupinus albus] RNA polymerase beta' subunit (chloroplast) [Lupinus micranthus] RNA polymerase beta (chloroplast) [Lupinus westianus] RNA polymerase beta' subunit (chloroplast) [Lupinus atlanticus] RNA polymerase beta' subunit (chloroplast) [Lupinus luteus]
OIV91285.1+XP_019427927.1	0.94025	0.96	1.04	2	hypothetical protein TanjilG_01816 [Lupinus angustifolius] PREDICTED: UDP-glucuronic acid decarboxylase 2-like [Lupinus angustifolius]
OIV90462.1+XP_019428080.1	0.94025	0.89	1.12	2	hypothetical protein TanjilG_28540 [Lupinus angustifolius] PREDICTED: importin subunit alpha-9 [Lupinus angustifolius]
XP_019418875.1	0.94025	1.02	1.02	8	PREDICTED: methionine S-methyltransferase [Lupinus angustifolius]
XP_019421644.1	0.94136	1.03	1.03	7	PREDICTED: nucleoside diphosphate kinase III, chloroplastic/mitochondrial-like [Lupinus angustifolius]
XP_019450130.1	0.94208	0.96	1.05	2	PREDICTED: desumoylating isopeptidase 1-like [Lupinus angustifolius]
XP_019457841.1	0.94229	0.98	1.02	4	PREDICTED: microtubule-associated protein futsch [Lupinus angustifolius]
OIV96022.1	0.94229	1.06	1.06	2	hypothetical protein TanjilG_27126 [Lupinus angustifolius]
XP_019431758.1+XP_019431757.1	0.94229	1.01	1.01	2	PREDICTED: sec1 family domain-containing protein MIP3 isoform X2 [Lupinus angustifolius] PREDICTED: sec1 family domain-containing protein MIP3 isoform X1 [Lupinus angustifolius]
XP_019446061.1	0.94229	1.06	1.06	6	PREDICTED: acyl-coenzyme A oxidase 4, peroxisomal-like [Lupinus angustifolius]
OIV95996.1+XP_019420054.1	0.94229	1.07	1.07	3	hypothetical protein TanjilG_27100 [Lupinus angustifolius] PREDICTED: ferredoxin--NADP reductase, root isozyme, chloroplastic-like [Lupinus angustifolius]
XP_019426732.1	0.94259	1.11	1.11	2	PREDICTED: uncharacterized membrane protein At1g16860-like [Lupinus angustifolius]
XP_019420113.1+XP_019440566.1	0.94259	0.97	1.03	5	PREDICTED: DEAD-box ATP-dependent RNA helicase 35 [Lupinus angustifolius] PREDICTED: DEAD-box ATP-dependent RNA helicase 35-like [Lupinus angustifolius]
XP_019428110.1	0.94259	1.05	1.05	6	PREDICTED: probable methyltransferase PMT2 [Lupinus angustifolius]
XP_019412886.1	0.94310	1.01	1.01	3	PREDICTED: tRNA wybutosine-synthesizing protein 4 [Lupinus angustifolius]
XP_019425549.1+OIV92312.1	0.94310	1.04	1.04	7	PREDICTED: villin-3-like [Lupinus angustifolius] hypothetical protein TanjilG_10522 [Lupinus angustifolius]
XP_019448107.1+XP_019448108.1	0.94310	1.05	1.05	8	PREDICTED: pleiotropic drug resistance protein 1-like isoform X1 [Lupinus angustifolius] PREDICTED: pleiotropic drug resistance protein 1-like isoform X2 [Lupinus angustifolius]
OIW07601.1+XP_019450074.1	0.94321	0.94	1.06	3	hypothetical protein TanjilG_08332 [Lupinus angustifolius] PREDICTED: enoyl-[acyl-carrier-protein] reductase [NADH], chloroplastic-like [Lupinus angustifolius]
XP_019415344.1	0.94345	1.05	1.05	2	PREDICTED: aspartyl protease AED3-like [Lupinus angustifolius]
XP_019430619.1+XP_019430618.1	0.94345	0.92	1.09	3	PREDICTED: BAHD acyltransferase DCR isoform X2 [Lupinus angustifolius] PREDICTED: BAHD acyltransferase DCR isoform X1 [Lupinus angustifolius]
OIW05608.1	0.94388	0.96	1.04	5	hypothetical protein TanjilG_23394 [Lupinus angustifolius]
OIV98636.1+XP_019412985.1	0.94388	1.04	1.04	4	hypothetical protein TanjilG_12759 [Lupinus angustifolius] PREDICTED: E3 ubiquitin-protein ligase PRT6-like [Lupinus angustifolius]
XP_019428612.1	0.94388	1.04	1.04	7	PREDICTED: sucrose-phosphatase 1-like [Lupinus angustifolius]
XP_019465473.1	0.94388	0.98	1.02	6	PREDICTED: ran-binding protein 9 [Lupinus angustifolius]
XP_019459458.1+OIW01221.1	0.94403	0.94	1.06	3	PREDICTED: probable proteasome inhibitor [Lupinus angustifolius] hypothetical protein TanjilG_10382 [Lupinus angustifolius]
XP_019427903.1	0.94403	0.96	1.04	2	PREDICTED: very-long-chain enoyl-CoA reductase-like [Lupinus angustifolius]
XP_019455570.1	0.94403	1.07	1.07	3	PREDICTED: eukaryotic translation initiation factor 3 subunit A-like [Lupinus angustifolius]
XP_019450827.1	0.94403	1.09	1.09	6	PREDICTED: patellin-3 [Lupinus angustifolius]
XP_019414664.1	0.94403	1.08	1.08	2	PREDICTED: L-ascorbate oxidase homolog [Lupinus angustifolius]
XP_019463352.1	0.94403	0.99	1.01	2	PREDICTED: 2-alkenal reductase (NADP(+)-dependent)-like [Lupinus angustifolius]
XP_019440520.1+XP_019440512.1	0.94437	0.97	1.03	11	PREDICTED: probable galactinol--sucrose galactosyltransferase 6 isoform X2 [Lupinus angustifolius] PREDICTED: probable galactinol--sucrose galactosyltransferase 6 isoform X1 [Lupinus angustifolius]
XP_019464538.1+XP_019459678.1+OIW18124.1	0.94437	1.06	1.06	3	PREDICTED: probable LRR receptor-like serine/threonine-protein kinase At5g10290 [Lupinus angustifolius] PREDICTED: probable LRR receptor-like serine/threonine-protein kinase At5g10290 [Lupinus angustifolius] hypothetical protein TanjilG_22322 [Lupinus angustifolius]
OIW18680.1+XP_019454369.1	0.94437	0.97	1.04	4	hypothetical protein TanjilG_13432 [Lupinus angustifolius] PREDICTED: (DL)-glycerol-3-phosphatase 2-like [Lupinus angustifolius]
OIW12782.1+XP_019441644.1+XP_019426603.1+XP_019436147.1+XP_019426682.1	0.94486	0.94	1.06	2	hypothetical protein TanjilG_24715 [Lupinus angustifolius] PREDICTED: 60S ribosomal protein L35 [Lupinus angustifolius] PREDICTED: 60S ribosomal protein L35-like [Lupinus angustifolius] PREDICTED: 60S ribosomal protein L35-like [Lupinus angustifolius] PREDICTED: 60S ribosomal protein L35-like [Lupinus angustifolius]
XP_019435582.1+OIV88994.1	0.94486	1.18	1.18	2	PREDICTED: cytochrome P450 77A3-like [Lupinus angustifolius] hypothetical protein TanjilG_07618 [Lupinus angustifolius]
OIW09290.1+XP_019447575.1	0.94486	1.17	1.17	2	hypothetical protein TanjilG_01261 [Lupinus angustifolius] PREDICTED: acidic mammalian chitinase-like [Lupinus angustifolius]
XP_019452217.1+XP_019452216.1+OIW07191.1	0.94511	1.00	1.00	3	PREDICTED: basic leucine zipper and W2 domain-containing protein 2-like isoform X2 [Lupinus angustifolius] PREDICTED: basic leucine zipper and W2 domain-containing protein 2-like isoform X1 [Lupinus angustifolius] hypothetical protein TanjilG_10164, partial [Lupinus angustifolius]
XP_019416804.1	0.94511	0.97	1.03	2	PREDICTED: splicing factor SF3a60 homolog [Lupinus angustifolius]
XP_019460901.1+XP_019460900.1	0.94511	1.05	1.05	5	PREDICTED: 60S ribosomal export protein NMD3 isoform X2 [Lupinus angustifolius] PREDICTED: 60S ribosomal export protein NMD3 isoform X1 [Lupinus angustifolius]
XP_019428873.1+OIV90755.1	0.94511	1.04	1.04	2	PREDICTED: ubiquitin carboxyl-terminal hydrolase 2-like [Lupinus angustifolius] hypothetical protein TanjilG_15488 [Lupinus angustifolius]
OIW16964.1+XP_019426709.1	0.94527	1.08	1.08	4	hypothetical protein TanjilG_32831 [Lupinus angustifolius] PREDICTED: vacuolar protein-sorting-associated protein 33 homolog [Lupinus angustifolius]
XP_019428156.1	0.94547	1.04	1.04	4	PREDICTED: phosphoenolpyruvate carboxylase 4 [Lupinus angustifolius]
XP_019440023.1	0.94547	0.95	1.06	2	PREDICTED: nuclear inhibitor of protein phosphatase 1 [Lupinus angustifolius]
XP_019464997.1	0.94547	0.97	1.03	5	PREDICTED: NADPH:quinone oxidoreductase [Lupinus angustifolius]
XP_019432553.1+OIW21215.1	0.94547	0.93	1.08	3	PREDICTED: probable 26S proteasome regulatory subunit p27 [Lupinus angustifolius] hypothetical protein TanjilG_31083 [Lupinus angustifolius]
XP_019449948.1	0.94547	0.87	1.15	3	PREDICTED: malate dehydrogenase-like [Lupinus angustifolius]
XP_019453226.1	0.94547	1.04	1.04	3	PREDICTED: peroxidase 31-like [Lupinus angustifolius]
XP_019448818.1	0.94547	0.83	1.20	3	PREDICTED: stress-response A/B barrel domain-containing protein At5g22580-like [Lupinus angustifolius]
XP_019420386.1+OIV94002.1+XP_019420966.1	0.94547	1.08	1.08	8	PREDICTED: long chain acyl-CoA synthetase 4-like [Lupinus angustifolius] hypothetical protein TanjilG_07550 [Lupinus angustifolius] PREDICTED: long chain acyl-CoA synthetase 4-like [Lupinus angustifolius]
XP_019419808.1	0.94547	0.96	1.04	4	PREDICTED: 1-aminocyclopropane-1-carboxylate oxidase-like [Lupinus angustifolius]
XP_019441912.1+XP_019441911.1	0.94560	0.98	1.02	9	PREDICTED: glutathione reductase, chloroplastic isoform X2 [Lupinus angustifolius] PREDICTED: glutathione reductase, chloroplastic isoform X1 [Lupinus angustifolius]
XP_019450008.1	0.94560	1.01	1.01	7	PREDICTED: kinesin-like protein KIN-UB [Lupinus angustifolius]
XP_019417441.1	0.94560	1.08	1.08	3	PREDICTED: pantothenate kinase 2-like [Lupinus angustifolius]
XP_019462139.1	0.94659	0.90	1.11	2	PREDICTED: pyruvate decarboxylase 2-like [Lupinus angustifolius]
XP_019448099.1	0.94659	1.06	1.06	2	PREDICTED: nuclear pore complex protein NUP93A-like [Lupinus angustifolius]
XP_019437904.1	0.94659	1.13	1.13	2	PREDICTED: subtilisin-like protease SBT1.7 [Lupinus angustifolius]
XP_019448931.1+XP_019448932.1	0.94659	1.02	1.02	11	PREDICTED: aconitate hydratase, cytoplasmic-like isoform X1 [Lupinus angustifolius] PREDICTED: aconitate hydratase, cytoplasmic-like isoform X2 [Lupinus angustifolius]
XP_019413410.1	0.94659	1.08	1.08	12	PREDICTED: delta(24)-sterol reductase [Lupinus angustifolius]
OIW14955.1+XP_019437826.1+Q40224.1+XP_019437827.1	0.94661	0.96	1.04	3	hypothetical protein TanjilG_30674 [Lupinus angustifolius] PREDICTED: guanine nucleotide-binding protein alpha-1 subunit-like isoform X1 [Lupinus angustifolius] RecName: Full=Guanine nucleotide-binding protein alpha-1 subunit; Short=GP-alpha-1 PREDICTED: guanine nucleotide-binding protein alpha-1 subunit-like isoform X2 [Lupinus angustifolius]
XP_019460445.1	0.94708	1.00	1.00	3	PREDICTED: MACPF domain-containing protein At4g24290-like [Lupinus angustifolius]
OIV92596.1+XP_019423125.1+XP_019423124.1	0.94708	0.96	1.05	4	hypothetical protein TanjilG_07587 [Lupinus angustifolius] PREDICTED: chaperone protein dnaJ 10 isoform X2 [Lupinus angustifolius] PREDICTED: chaperone protein dnaJ 10 isoform X1 [Lupinus angustifolius]
XP_019421527.1	0.94708	1.03	1.03	3	PREDICTED: peptidyl-prolyl cis-trans isomerase CYP40-like [Lupinus angustifolius]
XP_019414082.1	0.94710	1.02	1.02	2	PREDICTED: subtilisin-like protease SBT1.3 [Lupinus angustifolius]
XP_019425870.1	0.94710	0.98	1.02	14	PREDICTED: tryptophan synthase beta chain 1 [Lupinus angustifolius]
XP_019448027.1	0.94710	0.92	1.09	6	PREDICTED: xyloglucan endotransglucosylase/hydrolase protein 9-like [Lupinus angustifolius]
XP_019463471.1	0.94710	1.02	1.02	2	PREDICTED: ribose-phosphate pyrophosphokinase 1-like [Lupinus angustifolius]
OIW15875.1+XP_019457187.1+XP_019436452.1	0.94710	0.81	1.24	4	hypothetical protein TanjilG_04410 [Lupinus angustifolius] PREDICTED: 40S ribosomal protein S24-1-like [Lupinus angustifolius] PREDICTED: 40S ribosomal protein S24-1-like [Lupinus angustifolius]
XP_019419757.1	0.94741	0.99	1.01	4	PREDICTED: pyrophosphate--fructose 6-phosphate 1-phosphotransferase subunit beta [Lupinus angustifolius]
XP_019424530.1	0.94743	0.95	1.05	2	PREDICTED: lipid transfer-like protein VAS [Lupinus angustifolius]
OIW08120.1+XP_019449317.1	0.94743	1.00	1.00	3	hypothetical protein TanjilG_06663 [Lupinus angustifolius] PREDICTED: LOW QUALITY PROTEIN: DNA-directed RNA polymerase I subunit 2 [Lupinus angustifolius]
XP_019424308.1+XP_019446212.1	0.94743	1.01	1.01	19	PREDICTED: 40S ribosomal protein S2-4-like [Lupinus angustifolius] PREDICTED: 40S ribosomal protein S2-4-like [Lupinus angustifolius]
XP_019445210.1	0.94743	0.90	1.11	2	PREDICTED: acyl-CoA-binding protein-like [Lupinus angustifolius]
OIW14324.1+XP_019439231.1	0.94743	1.09	1.09	3	hypothetical protein TanjilG_21464, partial [Lupinus angustifolius] PREDICTED: kinesin-like protein KIN-14B [Lupinus angustifolius]
OIW01591.1+XP_019461671.1	0.94757	0.88	1.14	3	hypothetical protein TanjilG_20491 [Lupinus angustifolius] PREDICTED: 29 kDa ribonucleoprotein A, chloroplastic-like [Lupinus angustifolius]
XP_019452779.1+XP_019452778.1	0.94757	0.99	1.01	6	PREDICTED: protein SGT1 homolog isoform X2 [Lupinus angustifolius] PREDICTED: protein SGT1 homolog isoform X1 [Lupinus angustifolius]
XP_019431482.1	0.94757	1.06	1.06	3	PREDICTED: peptidyl-prolyl cis-trans isomerase CYP18-1 isoform X1 [Lupinus angustifolius]
XP_019457647.1+OIW18284.1	0.94757	0.95	1.05	4	PREDICTED: SUMO-activating enzyme subunit 1A-like [Lupinus angustifolius] hypothetical protein TanjilG_31424 [Lupinus angustifolius]
XP_019456603.1+XP_019456604.1	0.94773	0.89	1.13	6	PREDICTED: ubiquitin receptor RAD23d-like isoform X1 [Lupinus angustifolius] PREDICTED: ubiquitin receptor RAD23c-like isoform X2 [Lupinus angustifolius]
XP_019442961.1	0.94773	1.01	1.01	2	PREDICTED: carbon catabolite repressor protein 4 homolog 2-like [Lupinus angustifolius]
XP_019458957.1	0.94789	0.91	1.10	7	PREDICTED: pyrroline-5-carboxylate reductase [Lupinus angustifolius]
XP_019435268.1	0.94789	0.96	1.04	3	PREDICTED: 3beta-hydroxysteroid-dehydrogenase/decarboxylase-like [Lupinus angustifolius]
XP_019461809.1	0.94789	0.99	1.01	3	PREDICTED: pyrophosphate--fructose 6-phosphate 1-phosphotransferase subunit alpha-like [Lupinus angustifolius]
XP_019437870.1+XP_019437869.1+OIW14927.1	0.94789	1.03	1.03	4	PREDICTED: branched-chain-amino-acid aminotransferase 2, chloroplastic-like isoform X2 [Lupinus angustifolius] PREDICTED: branched-chain-amino-acid aminotransferase 2, chloroplastic-like isoform X1 [Lupinus angustifolius] hypothetical protein TanjilG_30646 [Lupinus angustifolius]
XP_019414715.1	0.94789	0.84	1.20	5	PREDICTED: nuclear transport factor 2-like [Lupinus angustifolius]
XP_019431040.1	0.94789	1.00	1.00	2	PREDICTED: histone acetyltransferase of the MYST family 1-like [Lupinus angustifolius]
XP_019453901.1	0.94789	1.09	1.09	2	PREDICTED: glucomannan 4-beta-mannosyltransferase 2-like [Lupinus angustifolius]
XP_019450885.1+XP_019412675.1	0.94789	0.95	1.05	3	PREDICTED: ADP-ribosylation factor-like [Lupinus angustifolius] PREDICTED: ADP-ribosylation factor 1-like 2 [Lupinus angustifolius]
XP_019424472.1	0.94789	1.02	1.02	12	PREDICTED: dynamin-related protein 1C [Lupinus angustifolius]
XP_019425727.1+XP_019425726.1	0.94789	1.03	1.03	2	PREDICTED: calmodulin-binding transcription activator 2 isoform X2 [Lupinus angustifolius] PREDICTED: calmodulin-binding transcription activator 2 isoform X1 [Lupinus angustifolius]
XP_019419201.1	0.94789	1.03	1.03	4	PREDICTED: protein transport protein Sec24-like At3g07100 [Lupinus angustifolius]
XP_019453708.1+OIW06006.1	0.94820	0.97	1.03	2	PREDICTED: probable protein phosphatase 2C 58 [Lupinus angustifolius] hypothetical protein TanjilG_11693 [Lupinus angustifolius]
XP_019437887.1+XP_019437888.1+OIW14918.1	0.94820	0.98	1.02	2	PREDICTED: actin-related protein 2 isoform X1 [Lupinus angustifolius] PREDICTED: actin-related protein 2 isoform X2 [Lupinus angustifolius] hypothetical protein TanjilG_30637 [Lupinus angustifolius]
XP_019446790.1	0.94820	1.01	1.01	2	PREDICTED: nicotinate phosphoribosyltransferase 2-like [Lupinus angustifolius]
XP_019415147.1	0.94820	1.06	1.06	11	PREDICTED: trafficking protein particle complex II-specific subunit 120 homolog [Lupinus angustifolius]
XP_019448132.1	0.94820	1.02	1.02	2	PREDICTED: uncharacterized protein LOC109351202 [Lupinus angustifolius]
XP_019412956.1+XP_019412955.1+OIV99691.1	0.94820	0.89	1.12	4	PREDICTED: autophagy-related protein 3 isoform X2 [Lupinus angustifolius] PREDICTED: autophagy-related protein 3 isoform X1 [Lupinus angustifolius] hypothetical protein TanjilG_17501 [Lupinus angustifolius]
OIV96429.1+XP_019416944.1+OIV97703.1+XP_019415119.1	0.94820	1.07	1.07	5	hypothetical protein TanjilG_09856 [Lupinus angustifolius] PREDICTED: uncharacterized protein LOC109328113 isoform X1 [Lupinus angustifolius] hypothetical protein TanjilG_12460 [Lupinus angustifolius] PREDICTED: uncharacterized protein LOC109326771 [Lupinus angustifolius]
XP_019435515.1	0.94820	1.01	1.01	6	PREDICTED: N-alpha-acetyltransferase 25, NatB auxiliary subunit [Lupinus angustifolius]
XP_019428159.1	0.94820	1.09	1.09	5	PREDICTED: type II inositol polyphosphate 5-phosphatase 15-like [Lupinus angustifolius]
XP_019448617.1+XP_019448608.1	0.94821	0.89	1.12	3	PREDICTED: sterol 3-beta-glucosyltransferase UGT80A2-like isoform X2 [Lupinus angustifolius] PREDICTED: sterol 3-beta-glucosyltransferase UGT80A2-like isoform X1 [Lupinus angustifolius]
XP_019423387.1+OIV92780.1	0.94821	1.01	1.01	10	PREDICTED: leucine--tRNA ligase, cytoplasmic-like isoform X1 [Lupinus angustifolius] hypothetical protein TanjilG_00914 [Lupinus angustifolius]
XP_019458085.1+OIW03884.1+XP_019458087.1	0.94835	0.96	1.04	5	PREDICTED: cinnamoyl-CoA reductase 1 isoform X1 [Lupinus angustifolius] hypothetical protein TanjilG_30160 [Lupinus angustifolius] PREDICTED: cinnamoyl-CoA reductase 1 isoform X2 [Lupinus angustifolius]
XP_019437598.1+XP_019437603.1	0.94835	0.96	1.04	3	PREDICTED: apoptotic chromatin condensation inducer in the nucleus-like isoform X1 [Lupinus angustifolius] PREDICTED: apoptotic chromatin condensation inducer in the nucleus-like isoform X2 [Lupinus angustifolius]
XP_019463940.1+OIW00789.1	0.94835	1.01	1.01	3	PREDICTED: uncharacterized protein LOC109362543 [Lupinus angustifolius] hypothetical protein TanjilG_19594 [Lupinus angustifolius]
XP_019439433.1	0.94852	0.97	1.03	2	PREDICTED: mannose-1-phosphate guanylyltransferase 1-like [Lupinus angustifolius]
XP_019456567.1+XP_019456566.1+XP_019456569.1+OIW04378.1	0.94852	1.10	1.10	2	PREDICTED: 6-phosphofructo-2-kinase/fructose-2,6-bisphosphatase-like isoform X2 [Lupinus angustifolius] PREDICTED: 6-phosphofructo-2-kinase/fructose-2,6-bisphosphatase-like isoform X1 [Lupinus angustifolius] PREDICTED: 6-phosphofructo-2-kinase/fructose-2,6-bisphosphatase-like isoform X3 [Lupinus angustifolius] hypothetical protein TanjilG_32570 [Lupinus angustifolius]
XP_019420255.1+OIV93974.1+XP_019446447.1	0.94852	0.99	1.01	7	PREDICTED: ABC transporter I family member 6, chloroplastic-like [Lupinus angustifolius] hypothetical protein TanjilG_05677 [Lupinus angustifolius] PREDICTED: ABC transporter I family member 6, chloroplastic [Lupinus angustifolius]
XP_019462563.1	0.94852	1.06	1.06	6	PREDICTED: alanine--glyoxylate aminotransferase 2 homolog 3, mitochondrial-like [Lupinus angustifolius]
XP_019423312.1+XP_019423313.1	0.94852	1.03	1.03	9	PREDICTED: probable phosphoinositide phosphatase SAC9 isoform X1 [Lupinus angustifolius] PREDICTED: probable phosphoinositide phosphatase SAC9 isoform X2 [Lupinus angustifolius]
XP_019447001.1+OIW09555.1	0.94863	0.92	1.09	2	PREDICTED: heat shock factor protein HSF8-like [Lupinus angustifolius] hypothetical protein TanjilG_28154 [Lupinus angustifolius]
XP_019413586.1	0.94863	1.03	1.03	3	PREDICTED: luc7-like protein 3 [Lupinus angustifolius]
XP_019438195.1	0.94863	0.81	1.23	2	PREDICTED: 40S ribosomal protein S9-2-like [Lupinus angustifolius]
XP_019414200.1+XP_019449438.1+XP_019426939.1	0.94863	1.25	1.25	4	PREDICTED: protein PPLZ12-like [Lupinus angustifolius] PREDICTED: protein PPLZ12 [Lupinus angustifolius] PREDICTED: hypersensitive-induced response protein 4-like [Lupinus angustifolius]
XP_019442855.1	0.94863	1.00	1.00	4	PREDICTED: WD-40 repeat-containing protein MSI4-like [Lupinus angustifolius]
OIV95906.1+XP_019419029.1+XP_019419030.1+XP_019419031.1	0.94863	1.03	1.03	6	hypothetical protein TanjilG_27010 [Lupinus angustifolius] PREDICTED: topless-related protein 2-like isoform X1 [Lupinus angustifolius] PREDICTED: topless-related protein 2-like isoform X2 [Lupinus angustifolius] PREDICTED: topless-related protein 2-like isoform X3 [Lupinus angustifolius]
XP_019419598.1+OIV95434.1+XP_019419597.1	0.94867	1.00	1.00	3	PREDICTED: TBCC domain-containing protein 1-like isoform X2 [Lupinus angustifolius] hypothetical protein TanjilG_06896 [Lupinus angustifolius] PREDICTED: TBCC domain-containing protein 1-like isoform X1 [Lupinus angustifolius]
OIW18179.1+XP_019459030.1	0.94867	0.99	1.01	5	hypothetical protein TanjilG_31299 [Lupinus angustifolius] PREDICTED: carbamoyl-phosphate synthase small chain, chloroplastic-like [Lupinus angustifolius]
XP_019460867.1	0.94867	1.03	1.03	9	PREDICTED: brefeldin A-inhibited guanine nucleotide-exchange protein 1-like [Lupinus angustifolius]
XP_019453281.1	0.94887	0.95	1.05	3	PREDICTED: 26S protease regulatory subunit 6A homolog B [Lupinus angustifolius]
XP_019453783.1	0.94894	1.04	1.04	14	PREDICTED: NEDD8-activating enzyme E1 regulatory subunit AXR1-like [Lupinus angustifolius]
OIV95653.1	0.94894	0.91	1.10	2	hypothetical protein TanjilG_01447 [Lupinus angustifolius]
XP_019436313.1	0.94894	1.07	1.07	4	PREDICTED: UDP-D-apiose/UDP-D-xylose synthase 2-like [Lupinus angustifolius]
XP_019413665.1	0.94894	0.93	1.08	4	PREDICTED: acylamino-acid-releasing enzyme-like [Lupinus angustifolius]
XP_019425904.1	0.94894	1.00	1.00	3	PREDICTED: dynamin-related protein 3A-like [Lupinus angustifolius]
XP_019432719.1+XP_019434364.1	0.94894	0.95	1.05	3	PREDICTED: peptidyl-prolyl cis-trans isomerase CYP21-4-like [Lupinus angustifolius] PREDICTED: peptidyl-prolyl cis-trans isomerase CYP21-4-like [Lupinus angustifolius]
OIV94352.1+XP_019421896.1	0.94899	1.03	1.03	2	hypothetical protein TanjilG_21692 [Lupinus angustifolius] PREDICTED: vesicle-fusing ATPase-like [Lupinus angustifolius]
XP_019444294.1	0.94899	1.01	1.01	2	PREDICTED: cactin-like [Lupinus angustifolius]
XP_019420189.1	0.94899	0.92	1.09	3	PREDICTED: elongation factor Ts, mitochondrial [Lupinus angustifolius]
XP_019440206.1+XP_019419207.1+XP_019419206.1	0.94908	0.97	1.03	6	PREDICTED: magnesium-chelatase subunit ChlI, chloroplastic [Lupinus angustifolius] PREDICTED: magnesium-chelatase subunit ChlI, chloroplastic isoform X2 [Lupinus angustifolius] PREDICTED: magnesium-chelatase subunit ChlI, chloroplastic isoform X1 [Lupinus angustifolius]
OIV95827.1+XP_019419721.1	0.94908	0.97	1.04	2	hypothetical protein TanjilG_06803 [Lupinus angustifolius] PREDICTED: glucan endo-1,3-beta-glucosidase 1-like [Lupinus angustifolius]
XP_019426637.1+OIV90447.1+XP_019426638.1	0.94908	1.02	1.02	2	PREDICTED: F-box protein At3g58530 isoform X1 [Lupinus angustifolius] hypothetical protein TanjilG_01925 [Lupinus angustifolius] PREDICTED: F-box protein At3g58530 isoform X2 [Lupinus angustifolius]
XP_019443832.1	0.94912	0.95	1.06	4	PREDICTED: uncharacterized protein LOC109348075 [Lupinus angustifolius]
XP_019430233.1	0.94931	1.03	1.03	2	PREDICTED: 4-alpha-glucanotransferase, chloroplastic/amyloplastic [Lupinus angustifolius]
XP_019439299.1+OIW14282.1	0.94931	0.96	1.05	5	PREDICTED: probable histone-arginine methyltransferase 1.4 [Lupinus angustifolius] hypothetical protein TanjilG_21422 [Lupinus angustifolius]
XP_019422146.1	0.94932	1.06	1.06	4	PREDICTED: protein NLRC3 [Lupinus angustifolius]
XP_019417330.1	0.94999	0.98	1.02	4	PREDICTED: UBP1-associated protein 2C-like [Lupinus angustifolius]
XP_019425927.1	0.94999	1.09	1.09	3	PREDICTED: protein RMD5 homolog A-like [Lupinus angustifolius]
XP_019424335.1	0.95012	0.97	1.03	2	PREDICTED: glucan endo-1,3-beta-glucosidase-like [Lupinus angustifolius]
XP_019452936.1	0.95012	0.89	1.13	4	PREDICTED: outer plastidial membrane protein porin-like [Lupinus angustifolius]
XP_019458467.1	0.95019	0.95	1.06	3	PREDICTED: apyrase 2-like [Lupinus angustifolius]
XP_019454511.1+OIV90734.1+XP_019427751.1+OIW04216.1+XP_019454510.1	0.95019	1.01	1.01	3	PREDICTED: 50S ribosomal protein HLP, mitochondrial-like isoform X2 [Lupinus angustifolius] hypothetical protein TanjilG_21865 [Lupinus angustifolius] PREDICTED: 50S ribosomal protein HLP, mitochondrial-like [Lupinus angustifolius] hypothetical protein TanjilG_00776, partial [Lupinus angustifolius] PREDICTED: 50S ribosomal protein HLP, mitochondrial-like isoform X1 [Lupinus angustifolius]
XP_019449555.1+OIW07953.1	0.95030	0.89	1.12	6	PREDICTED: eukaryotic translation initiation factor 2D [Lupinus angustifolius] hypothetical protein TanjilG_20054 [Lupinus angustifolius]
XP_019438364.1	0.95030	0.97	1.03	4	PREDICTED: probable sarcosine oxidase [Lupinus angustifolius]
XP_019423105.1+OIW17506.1	0.95030	0.99	1.01	3	PREDICTED: mevalonate kinase [Lupinus angustifolius] hypothetical protein TanjilG_22618 [Lupinus angustifolius]
XP_019431539.1	0.95030	0.95	1.06	5	PREDICTED: probable voltage-gated potassium channel subunit beta [Lupinus angustifolius]
P52581.1	0.95046	1.04	1.04	2	RecName: Full=Isoflavone reductase homolog
XP_019429275.1	0.95046	0.98	1.02	2	PREDICTED: glyoxylate/succinic semialdehyde reductase 1-like [Lupinus angustifolius]
XP_019447067.1+XP_019447068.1	0.95046	1.07	1.07	2	PREDICTED: cleavage and polyadenylation specificity factor subunit CG7185-like isoform X1 [Lupinus angustifolius] PREDICTED: cleavage and polyadenylation specificity factor subunit CG7185-like isoform X2 [Lupinus angustifolius]
XP_019427612.1	0.95046	1.00	1.00	2	PREDICTED: uncharacterized protein LOC109335846 [Lupinus angustifolius]
XP_019460840.1+XP_019460841.1+XP_019460839.1	0.95046	0.96	1.04	3	PREDICTED: cell division cycle and apoptosis regulator protein 1 isoform X2 [Lupinus angustifolius] PREDICTED: cell division cycle and apoptosis regulator protein 1 isoform X3 [Lupinus angustifolius] PREDICTED: cell division cycle and apoptosis regulator protein 1 isoform X1 [Lupinus angustifolius]
XP_019412951.1+XP_019450851.1+OIW08769.1	0.95046	0.98	1.02	2	PREDICTED: branchpoint-bridging protein-like [Lupinus angustifolius] PREDICTED: branchpoint-bridging protein-like [Lupinus angustifolius] hypothetical protein TanjilG_16350 [Lupinus angustifolius]
XP_019416358.1+OIV97259.1	0.95110	0.92	1.08	2	PREDICTED: exosome complex exonuclease RRP46 homolog [Lupinus angustifolius] hypothetical protein TanjilG_10793 [Lupinus angustifolius]
XP_019464593.1	0.95110	1.00	1.00	5	PREDICTED: temperature-induced lipocalin-1 [Lupinus angustifolius]
OIW12143.1+XP_019442944.1+XP_019442943.1	0.95110	1.05	1.05	3	hypothetical protein TanjilG_28551 [Lupinus angustifolius] PREDICTED: probable methyltransferase PMT7 isoform X2 [Lupinus angustifolius] PREDICTED: probable methyltransferase PMT7 isoform X1 [Lupinus angustifolius]
XP_019448824.1+OIW08824.1	0.95110	0.95	1.05	3	PREDICTED: translocon-associated protein subunit alpha-like [Lupinus angustifolius] hypothetical protein TanjilG_16405 [Lupinus angustifolius]
OIW08943.1+XP_019448314.1	0.95110	1.08	1.08	8	hypothetical protein TanjilG_05919 [Lupinus angustifolius] PREDICTED: xanthine dehydrogenase 1-like [Lupinus angustifolius]
OIW07038.1	0.95139	0.97	1.03	2	hypothetical protein TanjilG_02672 [Lupinus angustifolius]
OIW09257.1+XP_019447508.1	0.95139	0.95	1.05	2	hypothetical protein TanjilG_01228 [Lupinus angustifolius] PREDICTED: replication protein A 32 kDa subunit A-like [Lupinus angustifolius]
XP_019461452.1	0.95139	1.02	1.02	3	PREDICTED: exocyst complex component SEC6 [Lupinus angustifolius]
XP_019442378.1+XP_019424681.1+CCH47175.1	0.95139	0.91	1.10	2	PREDICTED: iron-sulfur assembly protein IscA-like 2, mitochondrial, partial [Lupinus angustifolius] PREDICTED: iron-sulfur assembly protein IscA-like 2, mitochondrial [Lupinus angustifolius] similar to iron-sulfur assembly protein IscA-like [Lupinus angustifolius]
XP_019432668.1	0.95139	1.00	1.00	2	PREDICTED: nuclear pore complex protein NUP155-like [Lupinus angustifolius]
XP_019456140.1+XP_019456139.1	0.95141	0.94	1.06	2	PREDICTED: aspartic proteinase Asp1 isoform X2 [Lupinus angustifolius] PREDICTED: aspartic proteinase Asp1 isoform X1 [Lupinus angustifolius]
OIW09833.1+XP_019446629.1	0.95141	0.95	1.06	6	hypothetical protein TanjilG_20540 [Lupinus angustifolius] PREDICTED: copper chaperone for superoxide dismutase, chloroplastic/cytosolic [Lupinus angustifolius]
XP_019435583.1	0.95141	1.06	1.06	8	PREDICTED: probable methyltransferase PMT27 [Lupinus angustifolius]
XP_019448973.1+OIW08394.1	0.95141	0.99	1.01	4	PREDICTED: external alternative NAD(P)H-ubiquinone oxidoreductase B1, mitochondrial [Lupinus angustifolius] hypothetical protein TanjilG_03070 [Lupinus angustifolius]
XP_019439410.1	0.95157	1.08	1.08	7	PREDICTED: sedoheptulose-1,7-bisphosphatase, chloroplastic [Lupinus angustifolius]
XP_019453709.1	0.95157	1.10	1.10	4	PREDICTED: ADP,ATP carrier protein 3, mitochondrial-like [Lupinus angustifolius]
XP_019452271.1+XP_019452274.1+XP_019452267.1+XP_019452272.1+XP_019452273.1+XP_019452276.1+XP_019452270.1+XP_019452275.1	0.95157	1.04	1.04	5	PREDICTED: lon protease homolog 1, mitochondrial-like isoform X3 [Lupinus angustifolius] PREDICTED: lon protease homolog 1, mitochondrial-like isoform X6 [Lupinus angustifolius] PREDICTED: lon protease homolog 1, mitochondrial-like isoform X1 [Lupinus angustifolius] PREDICTED: lon protease homolog 1, mitochondrial-like isoform X4 [Lupinus angustifolius] PREDICTED: lon protease homolog 1, mitochon…
XP_019430652.1+XP_019430653.1	0.95157	0.98	1.02	2	PREDICTED: membrane magnesium transporter isoform X1 [Lupinus angustifolius] PREDICTED: membrane magnesium transporter isoform X2 [Lupinus angustifolius]
XP_019430465.1	0.95157	0.95	1.05	2	PREDICTED: aldose 1-epimerase-like [Lupinus angustifolius]
XP_019449999.1	0.95157	0.99	1.02	3	PREDICTED: chaperonin CPN60-2, mitochondrial-like [Lupinus angustifolius]
XP_019426575.1+OIV90217.1	0.95176	1.06	1.06	2	PREDICTED: UDP-glycosyltransferase 83A1-like [Lupinus angustifolius] hypothetical protein TanjilG_01413 [Lupinus angustifolius]
XP_019420315.1+XP_019420316.1+OIV94209.1+XP_019420317.1	0.95184	0.97	1.03	3	PREDICTED: glycine cleavage system H protein 2, mitochondrial-like isoform X1 [Lupinus angustifolius] PREDICTED: glycine cleavage system H protein 2, mitochondrial-like isoform X2 [Lupinus angustifolius] hypothetical protein TanjilG_28148 [Lupinus angustifolius] PREDICTED: glycine cleavage system H protein 2, mitochondrial-like isoform X3 [Lupinus angustifolius]
XP_019431286.1	0.95184	0.98	1.02	7	PREDICTED: diaminopimelate decarboxylase 1, chloroplastic-like [Lupinus angustifolius]
XP_019419900.1	0.95184	0.97	1.03	3	PREDICTED: ATP-dependent Clp protease proteolytic subunit-related protein 3, chloroplastic [Lupinus angustifolius]
XP_019426300.1	0.95188	0.99	1.01	2	PREDICTED: trans-resveratrol di-O-methyltransferase-like [Lupinus angustifolius]
OIW11355.1+CCH47171.1+XP_019444249.1	0.95217	0.99	1.01	4	hypothetical protein TanjilG_19611 [Lupinus angustifolius] similar to cell division protein ftsZ homolog 2-1 [Lupinus angustifolius] PREDICTED: cell division protein FtsZ homolog 2-1, chloroplastic-like [Lupinus angustifolius]
XP_019448232.1	0.95217	1.03	1.03	4	PREDICTED: uncharacterized protein LOC109351267 [Lupinus angustifolius]
XP_019413553.1+XP_019432523.1+OIW21198.1+OIV98784.1+XP_019413550.1+XP_019413552.1	0.95264	1.00	1.00	2	PREDICTED: CCR4-NOT transcription complex subunit 11-like isoform X3 [Lupinus angustifolius] PREDICTED: CCR4-NOT transcription complex subunit 11-like [Lupinus angustifolius] hypothetical protein TanjilG_30799 [Lupinus angustifolius] hypothetical protein TanjilG_20508 [Lupinus angustifolius] PREDICTED: CCR4-NOT transcription complex subunit 11-like isoform X1 [Lupinus angustifolius] PREDICTED: CC…
OIW13827.1+XP_019428385.1+XP_019419396.1+OIV95149.1+XP_019428384.1+OIV90818.1+XP_019419395.1+XP_019419713.1+XP_019432312.1+XP_019432306.1+XP_019419714.1	0.95264	1.08	1.08	2	hypothetical protein TanjilG_31716 [Lupinus angustifolius] PREDICTED: probable serine/threonine-protein kinase WNK9 isoform X2 [Lupinus angustifolius] PREDICTED: probable serine/threonine-protein kinase WNK9 isoform X2 [Lupinus angustifolius] hypothetical protein TanjilG_21539 [Lupinus angustifolius] PREDICTED: probable serine/threonine-protein kinase WNK9 isoform X1 [Lupinus angustifolius] hypot…
XP_019449536.1+XP_019449532.1+XP_019449537.1+XP_019453380.1	0.95264	1.11	1.11	4	PREDICTED: histone deacetylase 19-like isoform X2 [Lupinus angustifolius] PREDICTED: histone deacetylase 19-like isoform X1 [Lupinus angustifolius] PREDICTED: histone deacetylase 19-like isoform X3 [Lupinus angustifolius] PREDICTED: histone deacetylase 19-like [Lupinus angustifolius]
XP_019442554.1	0.95264	0.93	1.07	3	PREDICTED: monodehydroascorbate reductase 4, peroxisomal [Lupinus angustifolius]
OIV92917.1	0.95279	1.05	1.05	3	hypothetical protein TanjilG_00094 [Lupinus angustifolius]
OIW05829.1	0.95279	1.01	1.01	4	hypothetical protein TanjilG_23615 [Lupinus angustifolius]
XP_019438537.1	0.95279	1.01	1.01	2	PREDICTED: MFP1 attachment factor 1-like [Lupinus angustifolius]
XP_019416742.1+OIV97041.1	0.95279	0.98	1.02	14	PREDICTED: ribonuclease TUDOR 1-like isoform X2 [Lupinus angustifolius] hypothetical protein TanjilG_11558 [Lupinus angustifolius]
XP_019436590.1	0.95279	1.07	1.07	3	PREDICTED: protein TOC75-3, chloroplastic-like [Lupinus angustifolius]
XP_019429332.1+XP_019456176.1	0.95279	0.98	1.02	4	PREDICTED: VHS domain-containing protein At3g16270-like [Lupinus angustifolius] PREDICTED: VHS domain-containing protein At3g16270-like isoform X1 [Lupinus angustifolius]
XP_019445890.1	0.95280	1.02	1.02	9	PREDICTED: pyruvate kinase, cytosolic isozyme-like [Lupinus angustifolius]
XP_019419400.1	0.95280	1.02	1.02	2	PREDICTED: extradiol ring-cleavage dioxygenase-like [Lupinus angustifolius]
XP_019421988.1	0.95292	0.92	1.09	6	PREDICTED: TOM1-like protein 2 [Lupinus angustifolius]
XP_019440288.1	0.95292	0.99	1.01	7	PREDICTED: quinone oxidoreductase PIG3-like [Lupinus angustifolius]
XP_019455650.1	0.95292	1.01	1.01	14	PREDICTED: E3 ubiquitin-protein ligase UPL1-like [Lupinus angustifolius]
XP_019436645.1	0.95292	1.00	1.00	4	PREDICTED: aldehyde dehydrogenase family 2 member C4-like [Lupinus angustifolius]
XP_019449077.1+XP_019449079.1+OIW08317.1	0.95292	0.96	1.05	2	PREDICTED: serine/threonine-protein kinase EDR1-like isoform X1 [Lupinus angustifolius] PREDICTED: serine/threonine-protein kinase EDR1-like isoform X2 [Lupinus angustifolius] hypothetical protein TanjilG_02993 [Lupinus angustifolius]
XP_019443019.1	0.95303	1.00	1.00	3	PREDICTED: uncharacterized protein LOC109347557 [Lupinus angustifolius]
XP_019430971.1	0.95368	0.98	1.02	9	PREDICTED: caffeic acid 3-O-methyltransferase [Lupinus angustifolius]
XP_019443107.1	0.95368	1.01	1.01	2	PREDICTED: 2-alkenal reductase (NADP(+)-dependent) [Lupinus angustifolius]
XP_019440495.1+OIW13532.1	0.95377	1.04	1.04	5	PREDICTED: probable aldo-keto reductase 1 [Lupinus angustifolius] hypothetical protein TanjilG_29273 [Lupinus angustifolius]
XP_019458180.1	0.95377	0.95	1.05	9	PREDICTED: protein disulfide isomerase-like 1-6 [Lupinus angustifolius]
XP_019442873.1	0.95408	0.93	1.07	2	PREDICTED: binding partner of ACD11 1 [Lupinus angustifolius]
XP_019418792.1	0.95408	0.93	1.07	3	PREDICTED: dynamin-related protein 3A-like isoform X1 [Lupinus angustifolius]
XP_019443476.1	0.95408	0.98	1.02	2	PREDICTED: IAA-amino acid hydrolase ILR1-like 4 [Lupinus angustifolius]
XP_019414062.1	0.95408	1.05	1.05	2	PREDICTED: ATP-dependent Clp protease proteolytic subunit 6, chloroplastic [Lupinus angustifolius]
XP_019417444.1+XP_019414504.1+OIV96587.1+OIV97863.1+XP_019414505.1	0.95424	0.90	1.11	2	PREDICTED: protein CutA, chloroplastic-like [Lupinus angustifolius] PREDICTED: protein CutA, chloroplastic-like isoform X1 [Lupinus angustifolius] hypothetical protein TanjilG_28444 [Lupinus angustifolius] hypothetical protein TanjilG_12620 [Lupinus angustifolius] PREDICTED: protein CutA 1, chloroplastic-like isoform X2 [Lupinus angustifolius]
XP_019422820.1+XP_019461716.1	0.95424	0.97	1.03	2	PREDICTED: guanosine nucleotide diphosphate dissociation inhibitor At5g09550 [Lupinus angustifolius] PREDICTED: guanosine nucleotide diphosphate dissociation inhibitor 2 [Lupinus angustifolius]
XP_019421504.1+XP_019421503.1	0.95424	1.07	1.07	2	PREDICTED: uncharacterized protein LOC109331448 isoform X2 [Lupinus angustifolius] PREDICTED: uncharacterized protein LOC109331448 isoform X1 [Lupinus angustifolius]
XP_019453174.1+XP_019453172.1+XP_019453173.1	0.95424	0.92	1.08	2	PREDICTED: protein GLC8-like isoform X3 [Lupinus angustifolius] PREDICTED: protein phosphatase inhibitor 2-like isoform X1 [Lupinus angustifolius] PREDICTED: protein phosphatase inhibitor 2-like isoform X2 [Lupinus angustifolius]
XP_019457561.1+OIW03831.1	0.95439	1.02	1.02	5	PREDICTED: coatomer subunit beta'-2-like [Lupinus angustifolius] hypothetical protein TanjilG_30107 [Lupinus angustifolius]
XP_019431741.1+XP_019463702.1	0.95439	1.09	1.09	2	PREDICTED: uncharacterized protein LOC109338850 [Lupinus angustifolius] PREDICTED: uncharacterized protein LOC109362400 [Lupinus angustifolius]
XP_019453069.1+XP_019453067.1+XP_019453068.1	0.95439	0.96	1.04	2	PREDICTED: spore wall protein 2-like isoform X3 [Lupinus angustifolius] PREDICTED: spore wall protein 2-like isoform X1 [Lupinus angustifolius] PREDICTED: spore wall protein 2-like isoform X2 [Lupinus angustifolius]
XP_019419519.1	0.95439	1.01	1.01	4	PREDICTED: golgin candidate 6-like [Lupinus angustifolius]
XP_019462403.1	0.95439	0.96	1.04	3	PREDICTED: peptidyl-prolyl cis-trans isomerase CYP21-4-like [Lupinus angustifolius]
XP_019454276.1	0.95464	1.03	1.03	7	PREDICTED: uncharacterized protein LOC109355528 [Lupinus angustifolius]
OIV99671.1+XP_019412945.1	0.95471	0.95	1.05	4	hypothetical protein TanjilG_17481 [Lupinus angustifolius] PREDICTED: protein transport protein SEC31 homolog B-like [Lupinus angustifolius]
XP_019427618.1+OIV90119.1	0.95471	0.98	1.02	2	PREDICTED: ribulose-1,5 bisphosphate carboxylase/oxygenase large subunit N-methyltransferase, chloroplastic-like [Lupinus angustifolius] hypothetical protein TanjilG_01573 [Lupinus angustifolius]
OIW11673.1+XP_019443713.1	0.95471	1.03	1.03	7	hypothetical protein TanjilG_18200 [Lupinus angustifolius] PREDICTED: thiosulfate/3-mercaptopyruvate sulfurtransferase 1, mitochondrial-like [Lupinus angustifolius]
XP_019421914.1+OIW17434.1+XP_019421929.1	0.95471	0.91	1.09	2	PREDICTED: probable glutamyl endopeptidase, chloroplastic isoform X1 [Lupinus angustifolius] hypothetical protein TanjilG_22546 [Lupinus angustifolius] PREDICTED: probable glutamyl endopeptidase, chloroplastic isoform X3 [Lupinus angustifolius]
XP_019460906.1	0.95478	1.01	1.01	3	PREDICTED: myosin-7-like isoform X1 [Lupinus angustifolius]
AMK48040.1+XP_019455993.1	0.95478	1.08	1.08	2	putative reactive intermediate deaminase [Lupinus angustifolius] PREDICTED: reactive Intermediate Deaminase A, chloroplastic-like [Lupinus angustifolius]
XP_019443618.1	0.95478	1.00	1.00	5	PREDICTED: DNA-damage-repair/toleration protein DRT100-like [Lupinus angustifolius]
OIW18193.1+XP_019459183.1	0.95478	0.96	1.04	3	hypothetical protein TanjilG_31313 [Lupinus angustifolius] PREDICTED: RNA cytidine acetyltransferase 1 [Lupinus angustifolius]
XP_019442954.1	0.95478	0.95	1.06	3	PREDICTED: calcium-transporting ATPase 4, plasma membrane-type-like [Lupinus angustifolius]
OIW05284.1+XP_019456227.1	0.95478	1.09	1.09	2	hypothetical protein TanjilG_03673 [Lupinus angustifolius] PREDICTED: uncharacterized protein LOC109357008 [Lupinus angustifolius]
XP_019421356.1	0.95478	0.98	1.02	3	PREDICTED: probable methyltransferase PMT2 [Lupinus angustifolius]
OIW04250.1+XP_019456344.1+XP_019456345.1	0.95487	0.87	1.15	2	hypothetical protein TanjilG_00810 [Lupinus angustifolius] PREDICTED: DUF21 domain-containing protein At1g55930, chloroplastic-like isoform X1 [Lupinus angustifolius] PREDICTED: DUF21 domain-containing protein At1g55930, chloroplastic-like isoform X2 [Lupinus angustifolius]
XP_019412843.1+OIV99682.1	0.95487	0.99	1.01	2	PREDICTED: chromatin modification-related protein eaf-1-like [Lupinus angustifolius] hypothetical protein TanjilG_17492 [Lupinus angustifolius]
XP_019424309.1	0.95487	1.08	1.08	2	PREDICTED: peptidyl-prolyl cis-trans isomerase CYP65 [Lupinus angustifolius]
XP_019441147.1+OIW19509.1	0.95487	1.00	1.00	2	PREDICTED: transmembrane 9 superfamily member 11-like [Lupinus angustifolius] hypothetical protein TanjilG_06964 [Lupinus angustifolius]
XP_019431014.1+XP_019431016.1	0.95487	1.06	1.06	2	PREDICTED: phospholipid-transporting ATPase 3-like isoform X1 [Lupinus angustifolius] PREDICTED: phospholipid-transporting ATPase 3-like isoform X2 [Lupinus angustifolius]
XP_019441067.1	0.95487	0.93	1.08	2	PREDICTED: probable glutathione S-transferase [Lupinus angustifolius]
XP_019421511.1+XP_019445949.1+XP_019455997.1+XP_019445650.1+XP_019428399.1	0.95490	0.94	1.06	3	PREDICTED: cullin-3A-like [Lupinus angustifolius] PREDICTED: cullin-3A-like [Lupinus angustifolius] PREDICTED: cullin-3A-like isoform X1 [Lupinus angustifolius] PREDICTED: cullin-3A-like isoform X1 [Lupinus angustifolius] PREDICTED: cullin-3A-like [Lupinus angustifolius]
XP_019421591.1+XP_019437449.1	0.95490	0.95	1.05	7	PREDICTED: 26S proteasome non-ATPase regulatory subunit 1 homolog A-like [Lupinus angustifolius] PREDICTED: 26S proteasome non-ATPase regulatory subunit 1 homolog A-like [Lupinus angustifolius]
XP_019461914.1	0.95490	0.98	1.02	9	PREDICTED: DEAD-box ATP-dependent RNA helicase 8-like [Lupinus angustifolius]
XP_019439455.1+XP_019463317.1+OIV99947.1+OIW19716.1	0.95490	1.04	1.04	2	PREDICTED: histone deacetylase 15 [Lupinus angustifolius] PREDICTED: LOW QUALITY PROTEIN: histone deacetylase 15-like [Lupinus angustifolius] hypothetical protein TanjilG_26285 [Lupinus angustifolius] hypothetical protein TanjilG_18526 [Lupinus angustifolius]
XP_019463781.1+XP_019434532.1+XP_019417244.1+XP_019459019.1	0.95490	1.00	1.00	8	PREDICTED: actin-7-like [Lupinus angustifolius] PREDICTED: actin-7-like [Lupinus angustifolius] PREDICTED: actin-7-like [Lupinus angustifolius] PREDICTED: actin-7 [Lupinus angustifolius]
XP_019448450.1+XP_019455565.1	0.95499	0.94	1.06	19	PREDICTED: 26S protease regulatory subunit 8 homolog A [Lupinus angustifolius] PREDICTED: 26S protease regulatory subunit 8 homolog A-like [Lupinus angustifolius]
OIV90496.1+XP_019428394.1	0.95499	1.01	1.01	3	hypothetical protein TanjilG_10260 [Lupinus angustifolius] PREDICTED: ADP-ribosylation factor GTPase-activating protein AGD7-like [Lupinus angustifolius]
OIW03031.1+XP_019458487.1	0.95499	1.07	1.07	4	hypothetical protein TanjilG_20959 [Lupinus angustifolius] PREDICTED: protein GPR107 [Lupinus angustifolius]
XP_019424012.1	0.95499	0.99	1.02	16	PREDICTED: uncharacterized protein LOC109333149 [Lupinus angustifolius]
XP_019461282.1+XP_019461283.1	0.95509	1.02	1.02	5	PREDICTED: uncharacterized protein LOC109360684 isoform X1 [Lupinus angustifolius] PREDICTED: uncharacterized protein LOC109360684 isoform X2 [Lupinus angustifolius]
OIV92186.1+XP_019425535.1+XP_019425536.1+XP_019425534.1+XP_019425539.1+XP_019425538.1	0.95509	0.94	1.07	3	hypothetical protein TanjilG_30894 [Lupinus angustifolius] PREDICTED: histone deacetylase HDT1-like isoform X2 [Lupinus angustifolius] PREDICTED: histone deacetylase HDT1-like isoform X3 [Lupinus angustifolius] PREDICTED: histone deacetylase HDT1-like isoform X1 [Lupinus angustifolius] PREDICTED: histone deacetylase HDT1-like isoform X6 [Lupinus angustifolius] PREDICTED: histone deacetylase HDT1-…
XP_019438499.1	0.95509	1.01	1.01	2	PREDICTED: aspartyl protease AED3-like [Lupinus angustifolius]
XP_019438614.1+XP_019415448.1	0.95509	0.98	1.02	5	PREDICTED: pre-mRNA-splicing factor SYF1-like [Lupinus angustifolius] PREDICTED: pre-mRNA-splicing factor SYF1-like [Lupinus angustifolius]
XP_019438287.1	0.95509	0.92	1.08	2	PREDICTED: uncharacterized protein LOC109344117 [Lupinus angustifolius]
XP_019457999.1	0.95509	1.01	1.01	6	PREDICTED: lys-63-specific deubiquitinase BRCC36-like [Lupinus angustifolius]
OIV97012.1+XP_019417192.1+XP_019417191.1	0.95509	0.97	1.03	2	hypothetical protein TanjilG_03586 [Lupinus angustifolius] PREDICTED: auxilin-related protein 2-like isoform X2 [Lupinus angustifolius] PREDICTED: auxilin-related protein 2-like isoform X1 [Lupinus angustifolius]
XP_019433903.1	0.95509	0.99	1.01	5	PREDICTED: indole-3-glycerol phosphate synthase, chloroplastic-like [Lupinus angustifolius]
XP_019450325.1	0.95510	1.03	1.03	2	PREDICTED: splicing factor 3B subunit 4 [Lupinus angustifolius]
XP_019436968.1	0.95510	1.09	1.09	2	PREDICTED: pre-mRNA-processing protein 40A [Lupinus angustifolius]
XP_019424051.1	0.95510	0.98	1.02	5	PREDICTED: phosphoacetylglucosamine mutase [Lupinus angustifolius]
XP_019448082.1+OIW09064.1	0.95510	1.04	1.04	2	PREDICTED: LOW QUALITY PROTEIN: kinectin-like [Lupinus angustifolius] hypothetical protein TanjilG_16291 [Lupinus angustifolius]
XP_019428313.1	0.95510	0.96	1.04	6	PREDICTED: transportin-1-like [Lupinus angustifolius]
XP_019428997.1	0.95512	0.95	1.05	4	PREDICTED: exportin-2-like [Lupinus angustifolius]
XP_019441123.1	0.95512	1.05	1.05	4	PREDICTED: cellulose synthase A catalytic subunit 3 [UDP-forming]-like [Lupinus angustifolius]
OIW07445.1+XP_019450416.1	0.95512	0.97	1.03	2	hypothetical protein TanjilG_19286 [Lupinus angustifolius] PREDICTED: vacuolar-sorting receptor 1-like [Lupinus angustifolius]
XP_019432321.1+XP_019432320.1	0.95515	0.96	1.04	3	PREDICTED: protein strawberry notch isoform X2 [Lupinus angustifolius] PREDICTED: protein strawberry notch isoform X1 [Lupinus angustifolius]
XP_019464793.1+XP_019430176.1+OIW00474.1+XP_019464794.1	0.95515	0.97	1.03	2	PREDICTED: ras-related protein RABC1-like isoform X1 [Lupinus angustifolius] PREDICTED: ras-related protein RABC1-like [Lupinus angustifolius] hypothetical protein TanjilG_05824 [Lupinus angustifolius] PREDICTED: ras-related protein RABC1-like isoform X2 [Lupinus angustifolius]
XP_019463605.1+XP_019463614.1	0.95515	1.02	1.02	7	PREDICTED: nucleolar protein 56-like isoform X1 [Lupinus angustifolius] PREDICTED: nucleolar protein 56-like isoform X2 [Lupinus angustifolius]
XP_019417413.1+XP_019417412.1	0.95515	1.04	1.04	3	PREDICTED: serine/arginine-rich splicing factor SR34A-like isoform X2 [Lupinus angustifolius] PREDICTED: serine/arginine-rich splicing factor SR34A-like isoform X1 [Lupinus angustifolius]
XP_019441922.1+XP_019441921.1	0.95531	1.07	1.07	3	PREDICTED: histone H1-like isoform X2 [Lupinus angustifolius] PREDICTED: histone H1-like isoform X1 [Lupinus angustifolius]
OIW04139.1+XP_019455864.1	0.95533	0.97	1.03	5	hypothetical protein TanjilG_00699 [Lupinus angustifolius] PREDICTED: 1-aminocyclopropane-1-carboxylate oxidase-like [Lupinus angustifolius]
YP_008963614.1+OIW17040.1+YP_009446180.1+YP_009127539.1	0.95533	1.03	1.03	4	cytochrome f (chloroplast) [Lupinus luteus] hypothetical protein TanjilG_00182 [Lupinus angustifolius] cytochrome f (chloroplast) [Lupinus westianus] cytochrome f (chloroplast) [Lupinus albus]
XP_019454222.1	0.95533	1.05	1.05	2	PREDICTED: fructose-bisphosphate aldolase 1, chloroplastic-like [Lupinus angustifolius]
XP_019433100.1+XP_019433110.1	0.95552	1.01	1.01	3	PREDICTED: ARF guanine-nucleotide exchange factor GNOM-like isoform X1 [Lupinus angustifolius] PREDICTED: ARF guanine-nucleotide exchange factor GNOM-like isoform X2 [Lupinus angustifolius]
XP_019433568.1	0.95552	0.95	1.06	2	PREDICTED: putative glucose-6-phosphate 1-epimerase [Lupinus angustifolius]
XP_019449715.1	0.95552	1.01	1.01	3	PREDICTED: trafficking protein particle complex subunit 1-like [Lupinus angustifolius]
OIW06270.1+XP_019453496.1	0.95566	1.02	1.02	5	hypothetical protein TanjilG_19708 [Lupinus angustifolius] PREDICTED: uncharacterized protein LOC109355046 [Lupinus angustifolius]
OIW14996.1+XP_019437756.1	0.95566	1.01	1.01	2	hypothetical protein TanjilG_30715 [Lupinus angustifolius] PREDICTED: uncharacterized protein LOC109343754 [Lupinus angustifolius]
XP_019428210.1	0.95575	0.99	1.01	5	PREDICTED: ATP synthase subunit beta, mitochondrial [Lupinus angustifolius]
XP_019447228.1	0.95575	1.01	1.01	2	PREDICTED: dual specificity protein phosphatase 12-like [Lupinus angustifolius]
XP_019425979.1	0.95575	1.03	1.03	6	PREDICTED: gamma-glutamyl hydrolase 2-like [Lupinus angustifolius]
XP_019450932.1	0.95584	1.00	1.00	5	PREDICTED: enoyl-[acyl-carrier-protein] reductase [NADH], chloroplastic-like [Lupinus angustifolius]
OIW14528.1+XP_019438539.1	0.95584	0.95	1.05	2	hypothetical protein TanjilG_04961 [Lupinus angustifolius] PREDICTED: protein DOWNSTREAM OF FLC-like [Lupinus angustifolius]
XP_019436915.1+XP_019436913.1+OIW15624.1+XP_019436914.1	0.95584	0.82	1.22	5	PREDICTED: maf-like protein DDB_G0281937 isoform X3 [Lupinus angustifolius] PREDICTED: maf-like protein DDB_G0281937 isoform X1 [Lupinus angustifolius] hypothetical protein TanjilG_08200 [Lupinus angustifolius] PREDICTED: maf-like protein DDB_G0281937 isoform X2 [Lupinus angustifolius]
XP_019423350.1	0.95584	0.91	1.10	4	PREDICTED: exportin-T-like [Lupinus angustifolius]
XP_019455568.1	0.95584	1.04	1.04	5	PREDICTED: protein CROWDED NUCLEI 1 [Lupinus angustifolius]
XP_019460898.1	0.95596	0.88	1.13	5	PREDICTED: 60S acidic ribosomal protein P0 [Lupinus angustifolius]
XP_019424048.1	0.95596	0.98	1.02	4	PREDICTED: uncharacterized protein LOC109333177 [Lupinus angustifolius]
XP_019433715.1	0.95617	0.91	1.09	2	PREDICTED: glycylpeptide N-tetradecanoyltransferase 1-like [Lupinus angustifolius]
XP_019456673.1	0.95617	1.00	1.00	4	PREDICTED: histidine--tRNA ligase, chloroplastic/mitochondrial [Lupinus angustifolius]
XP_019464126.1+XP_019464124.1+OIW00469.1+XP_019464125.1	0.95617	1.02	1.02	7	PREDICTED: probable pectinesterase/pectinesterase inhibitor 51 isoform X3 [Lupinus angustifolius] PREDICTED: probable pectinesterase/pectinesterase inhibitor 51 isoform X1 [Lupinus angustifolius] hypothetical protein TanjilG_05819 [Lupinus angustifolius] PREDICTED: probable pectinesterase/pectinesterase inhibitor 51 isoform X2 [Lupinus angustifolius]
OIV95938.1+XP_019419110.1	0.95619	1.01	1.01	6	hypothetical protein TanjilG_27042 [Lupinus angustifolius] PREDICTED: phytochrome B-like isoform X1 [Lupinus angustifolius]
XP_019421862.1	0.95619	0.98	1.02	3	PREDICTED: glycerol-3-phosphate acyltransferase, chloroplastic-like [Lupinus angustifolius]
XP_019428470.1	0.95619	0.89	1.13	8	PREDICTED: photosynthetic NDH subunit of lumenal location 5, chloroplastic [Lupinus angustifolius]
OIW06179.1+XP_019453437.1+XP_019449406.1+OIW07856.1	0.95619	1.05	1.05	2	hypothetical protein TanjilG_15063 [Lupinus angustifolius] PREDICTED: protein CHROMATIN REMODELING 35-like [Lupinus angustifolius] PREDICTED: protein CHROMATIN REMODELING 35-like [Lupinus angustifolius] hypothetical protein TanjilG_19957 [Lupinus angustifolius]
XP_019444570.1	0.95629	0.97	1.03	8	PREDICTED: proteasome subunit beta type-2-A [Lupinus angustifolius]
XP_019456335.1+XP_019419958.1+XP_019419295.1+XP_019414134.1+XP_019421134.1	0.95635	0.99	1.01	8	PREDICTED: actin-97-like [Lupinus angustifolius] PREDICTED: actin-97-like [Lupinus angustifolius] PREDICTED: actin-97-like [Lupinus angustifolius] PREDICTED: actin-like [Lupinus angustifolius] PREDICTED: actin-97-like [Lupinus angustifolius]
XP_019453906.1	0.95635	1.02	1.02	3	PREDICTED: UDP-D-apiose/UDP-D-xylose synthase 2 [Lupinus angustifolius]
XP_019414883.1	0.95635	0.92	1.09	3	PREDICTED: kelch domain-containing protein 4 [Lupinus angustifolius]
XP_019427586.1+OIV90188.1+XP_019427584.1	0.95635	0.92	1.09	2	PREDICTED: uncharacterized protein LOC109335831 isoform X2 [Lupinus angustifolius] hypothetical protein TanjilG_01384 [Lupinus angustifolius] PREDICTED: uncharacterized protein LOC109335831 isoform X1 [Lupinus angustifolius]
XP_019415739.1+OIV97942.1	0.95651	0.96	1.04	3	PREDICTED: replication factor C subunit 3 [Lupinus angustifolius] hypothetical protein TanjilG_12699 [Lupinus angustifolius]
OIV90249.1+XP_019428578.1	0.95651	0.93	1.07	2	hypothetical protein TanjilG_11977 [Lupinus angustifolius] PREDICTED: KH domain-containing protein At4g18375 isoform X1 [Lupinus angustifolius]
XP_019448039.1+OIW09037.1+XP_019457939.1+XP_019457942.1+XP_019457941.1	0.95659	1.05	1.05	4	PREDICTED: AP-2 complex subunit alpha-1-like isoform X1 [Lupinus angustifolius] hypothetical protein TanjilG_16264 [Lupinus angustifolius] PREDICTED: AP-2 complex subunit alpha-1-like isoform X1 [Lupinus angustifolius] PREDICTED: AP-2 complex subunit alpha-1-like isoform X3 [Lupinus angustifolius] PREDICTED: AP-2 complex subunit alpha-1-like isoform X2 [Lupinus angustifolius]
XP_019426025.1+XP_019426027.1	0.95659	1.01	1.01	4	PREDICTED: WD repeat-containing protein 70 isoform X1 [Lupinus angustifolius] PREDICTED: WD repeat-containing protein 70 isoform X2 [Lupinus angustifolius]
XP_019457132.1	0.95659	0.99	1.01	2	PREDICTED: phosphoenolpyruvate carboxylase 2 [Lupinus angustifolius]
XP_019426009.1	0.95661	0.97	1.03	3	PREDICTED: 1-aminocyclopropane-1-carboxylate oxidase [Lupinus angustifolius]
XP_019464313.1	0.95724	1.04	1.04	20	PREDICTED: NAD-dependent malic enzyme 62 kDa isoform, mitochondrial [Lupinus angustifolius]
XP_019439411.1+XP_019418074.1+XP_019418072.1	0.95724	1.03	1.03	3	PREDICTED: LIM domain-containing protein WLIM2b-like [Lupinus angustifolius] PREDICTED: LIM domain-containing protein WLIM2b-like isoform X2 [Lupinus angustifolius] PREDICTED: LIM domain-containing protein WLIM2b-like isoform X1 [Lupinus angustifolius]
XP_019413071.1	0.95732	0.94	1.06	6	PREDICTED: obtusifoliol 14-alpha demethylase-like [Lupinus angustifolius]
XP_019417509.1	0.95732	1.05	1.05	6	PREDICTED: quinone oxidoreductase-like protein 2 homolog [Lupinus angustifolius]
XP_019437684.1	0.95732	0.98	1.02	3	PREDICTED: uncharacterized protein At2g24330-like [Lupinus angustifolius]
OIW20672.1+XP_019431512.1	0.95732	1.00	1.00	5	hypothetical protein TanjilG_19737 [Lupinus angustifolius] PREDICTED: pumilio homolog 6, chloroplastic-like [Lupinus angustifolius]
OIW00385.1+XP_019464189.1+XP_019464188.1+XP_019464187.1	0.95732	1.02	1.02	9	hypothetical protein TanjilG_05735 [Lupinus angustifolius] PREDICTED: probable alpha-galactosidase B isoform X3 [Lupinus angustifolius] PREDICTED: uncharacterized protein LOC109362678 isoform X2 [Lupinus angustifolius] PREDICTED: uncharacterized protein LOC109362678 isoform X1 [Lupinus angustifolius]
XP_019461346.1	0.95732	0.89	1.12	2	PREDICTED: acetyl-coenzyme A carboxylase carboxyl transferase subunit alpha, chloroplastic-like [Lupinus angustifolius]
XP_019424764.1	0.95732	1.00	1.00	3	PREDICTED: dihydroneopterin aldolase 1-like [Lupinus angustifolius]
XP_019421671.1+OIV94620.1	0.95749	0.99	1.01	13	PREDICTED: leucine--tRNA ligase, cytoplasmic-like [Lupinus angustifolius] hypothetical protein TanjilG_25844 [Lupinus angustifolius]
XP_019425410.1	0.95764	1.00	1.00	3	PREDICTED: eukaryotic translation initiation factor 3 subunit C-like [Lupinus angustifolius]
XP_019464372.1+XP_019464373.1+OIW00210.1+XP_019464374.1	0.95764	0.94	1.06	2	PREDICTED: 3-oxoacyl-[acyl-carrier-protein] synthase II, chloroplastic-like isoform X1 [Lupinus angustifolius] PREDICTED: 3-oxoacyl-[acyl-carrier-protein] synthase II, chloroplastic-like isoform X2 [Lupinus angustifolius] hypothetical protein TanjilG_29200 [Lupinus angustifolius] PREDICTED: 3-oxoacyl-[acyl-carrier-protein] synthase II, chloroplastic-like isoform X3 [Lupinus angustifolius]
XP_019454374.1	0.95764	0.96	1.04	7	PREDICTED: protein transport protein SEC31 homolog B-like [Lupinus angustifolius]
XP_019441022.1+XP_019463083.1	0.95882	1.02	1.02	28	PREDICTED: 110 kDa U5 small nuclear ribonucleoprotein component CLO [Lupinus angustifolius] PREDICTED: 110 kDa U5 small nuclear ribonucleoprotein component CLO-like [Lupinus angustifolius]
XP_019461382.1	0.95889	0.98	1.02	3	PREDICTED: fructose-1,6-bisphosphatase, chloroplastic [Lupinus angustifolius]
XP_019418668.1	0.95889	0.97	1.03	8	PREDICTED: uncharacterized protein LOC109329445 [Lupinus angustifolius]
XP_019439764.1	0.95889	1.03	1.03	3	PREDICTED: glutamine synthetase leaf isozyme, chloroplastic-like [Lupinus angustifolius]
XP_019440625.1	0.95889	1.08	1.08	4	PREDICTED: protein transport protein Sec24-like At3g07100 [Lupinus angustifolius]
XP_019412859.1+XP_019420557.1+OIW17348.1	0.95889	1.04	1.04	6	PREDICTED: long chain acyl-CoA synthetase 2-like [Lupinus angustifolius] PREDICTED: long chain acyl-CoA synthetase 2-like [Lupinus angustifolius] hypothetical protein TanjilG_22460 [Lupinus angustifolius]
XP_019461524.1+XP_019455614.1+XP_019418711.1+XP_019440478.1+XP_019423671.1	0.95915	0.94	1.06	21	PREDICTED: 26S protease regulatory subunit 7 [Lupinus angustifolius] PREDICTED: 26S protease regulatory subunit 7-like [Lupinus angustifolius] PREDICTED: 26S protease regulatory subunit 7-like [Lupinus angustifolius] PREDICTED: 26S protease regulatory subunit 7-like [Lupinus angustifolius] PREDICTED: 26S protease regulatory subunit 7-like [Lupinus angustifolius]
XP_019417130.1+XP_019417131.1	0.95960	1.03	1.03	13	PREDICTED: uncharacterized protein LOC109328225 isoform X1 [Lupinus angustifolius] PREDICTED: uncharacterized protein LOC109328225 isoform X2 [Lupinus angustifolius]
OIW03711.1+XP_019458006.1	0.95960	1.04	1.04	2	hypothetical protein TanjilG_29746 [Lupinus angustifolius] PREDICTED: phosphoinositide 3-kinase regulatory subunit 4 [Lupinus angustifolius]
XP_019443447.1	0.95960	0.97	1.03	2	PREDICTED: hydroxyphenylpyruvate reductase-like [Lupinus angustifolius]
XP_019419018.1+OIV95331.1	0.95960	1.06	1.06	5	PREDICTED: pectin acetylesterase 3 isoform X2 [Lupinus angustifolius] hypothetical protein TanjilG_07487 [Lupinus angustifolius]
XP_019457196.1	0.95976	0.92	1.09	4	PREDICTED: ribulose-phosphate 3-epimerase, cytoplasmic isoform-like [Lupinus angustifolius]
XP_019415781.1+OIW18076.1+OIV98322.1+XP_019459994.1	0.95976	1.03	1.03	2	PREDICTED: subtilisin-like protease SBT2.2 [Lupinus angustifolius] hypothetical protein TanjilG_08546 [Lupinus angustifolius] hypothetical protein TanjilG_16649 [Lupinus angustifolius] PREDICTED: subtilisin-like protease SBT2.3 [Lupinus angustifolius]
XP_019444134.1	0.95982	1.09	1.09	2	PREDICTED: 60S ribosomal protein L21-1 [Lupinus angustifolius]
XP_019460302.1	0.95982	1.21	1.21	2	PREDICTED: inducible nitrate reductase [NADH] 2-like [Lupinus angustifolius]
OIW01425.1+XP_019461366.1+XP_019461365.1+XP_019439375.1	0.96131	1.14	1.14	2	hypothetical protein TanjilG_25721 [Lupinus angustifolius] PREDICTED: DNA-directed RNA polymerase II subunit RPB7-like isoform X2 [Lupinus angustifolius] PREDICTED: DNA-directed RNA polymerase II subunit RPB7-like isoform X1 [Lupinus angustifolius] PREDICTED: DNA-directed RNA polymerase II subunit RPB7 [Lupinus angustifolius]
XP_019419368.1	0.96208	0.99	1.01	4	PREDICTED: protein FAM91A1 [Lupinus angustifolius]
OIW20340.1+XP_019430849.1	0.96208	1.08	1.08	2	hypothetical protein TanjilG_08882 [Lupinus angustifolius] PREDICTED: nuclear cap-binding protein subunit 1-like [Lupinus angustifolius]
XP_019419672.1	0.96208	0.96	1.05	8	PREDICTED: activator of 90 kDa heat shock protein ATPase homolog [Lupinus angustifolius]
XP_019413755.1+XP_019443887.1+OIW11573.1+XP_019413757.1+XP_019443886.1	0.96208	0.99	1.01	3	PREDICTED: multiple organellar RNA editing factor 8, chloroplastic/mitochondrial-like isoform X1 [Lupinus angustifolius] PREDICTED: multiple organellar RNA editing factor 8, chloroplastic/mitochondrial-like isoform X2 [Lupinus angustifolius] hypothetical protein TanjilG_26939 [Lupinus angustifolius] PREDICTED: multiple organellar RNA editing factor 8, chloroplastic/mitochondrial-like isoform X2 […
XP_019464294.1	0.96224	0.99	1.01	15	PREDICTED: probable mannitol dehydrogenase 1 [Lupinus angustifolius]
XP_019461766.1	0.96224	0.99	1.01	5	PREDICTED: dihydrolipoyllysine-residue acetyltransferase component 4 of pyruvate dehydrogenase complex, chloroplastic-like [Lupinus angustifolius]
XP_019418035.1	0.96356	0.89	1.12	2	PREDICTED: uncharacterized protein LOC109328867 [Lupinus angustifolius]
XP_019440904.1+XP_019434371.1+XP_019440901.1+OIV89566.1+OIW13269.1+XP_019440903.1	0.96393	1.00	1.00	2	PREDICTED: uncharacterized protein LOC109346018 isoform X3 [Lupinus angustifolius] PREDICTED: uncharacterized protein LOC109341036 [Lupinus angustifolius] PREDICTED: uncharacterized protein LOC109346018 isoform X1 [Lupinus angustifolius] hypothetical protein TanjilG_19243 [Lupinus angustifolius] hypothetical protein TanjilG_25748 [Lupinus angustifolius] PREDICTED: uncharacterized protein LOC10934…
XP_019458295.1	0.96393	0.94	1.06	2	PREDICTED: polycomb group protein FERTILIZATION-INDEPENDENT ENDOSPERM-like [Lupinus angustifolius]
XP_019422693.1	0.96393	0.98	1.02	3	PREDICTED: plant UBX domain-containing protein 2-like [Lupinus angustifolius]
XP_019436439.1+XP_019454631.1	0.96431	0.98	1.02	17	PREDICTED: ruvB-like protein 1 [Lupinus angustifolius] PREDICTED: ruvB-like protein 1 [Lupinus angustifolius]
XP_019456697.1	0.96431	1.11	1.11	2	PREDICTED: peroxisomal (S)-2-hydroxy-acid oxidase GLO1 [Lupinus angustifolius]
XP_019458179.1	0.96431	0.97	1.03	2	PREDICTED: UBP1-associated protein 2A-like [Lupinus angustifolius]
XP_019453822.1	0.96576	0.94	1.06	2	PREDICTED: putative phosphatidylglycerol/phosphatidylinositol transfer protein DDB_G0282179 [Lupinus angustifolius]
XP_019429482.1	0.96576	1.04	1.04	2	PREDICTED: NAP1-related protein 2-like [Lupinus angustifolius]
XP_019450838.1+XP_019450837.1	0.96576	0.97	1.03	7	PREDICTED: protein transport protein SEC31 homolog B-like isoform X2 [Lupinus angustifolius] PREDICTED: protein transport protein SEC31 homolog B-like isoform X1 [Lupinus angustifolius]
CAB75428.1	0.96576	0.91	1.10	3	enolase [Lupinus luteus]
OIW12928.1+XP_019441403.1	0.96576	0.98	1.02	4	hypothetical protein TanjilG_15848 [Lupinus angustifolius] PREDICTED: glutamine--tRNA ligase-like [Lupinus angustifolius]
XP_019436360.1+XP_019436359.1+OIW15827.1	0.96578	1.00	1.00	2	PREDICTED: uncharacterized protein LOC109342809 isoform X2 [Lupinus angustifolius] PREDICTED: uncharacterized protein LOC109342809 isoform X1 [Lupinus angustifolius] hypothetical protein TanjilG_04362, partial [Lupinus angustifolius]
XP_019462292.1	0.96612	1.09	1.09	6	PREDICTED: probable acetyltransferase NATA1-like [Lupinus angustifolius]
XP_019464436.1+XP_019460781.1+XP_019431748.1	0.96612	0.92	1.09	4	PREDICTED: serine/threonine-protein phosphatase PP2A catalytic subunit-like [Lupinus angustifolius] PREDICTED: serine/threonine-protein phosphatase PP2A catalytic subunit [Lupinus angustifolius] PREDICTED: serine/threonine-protein phosphatase PP2A-2 catalytic subunit-like [Lupinus angustifolius]
XP_019464608.1	0.96612	0.99	1.01	12	PREDICTED: DNA replication licensing factor MCM5 [Lupinus angustifolius]
XP_019458426.1+XP_019458423.1+XP_019458419.1+OIW03663.1+XP_019458425.1+XP_019458422.1	0.96640	0.91	1.10	2	PREDICTED: probable ADP-ribosylation factor GTPase-activating protein AGD14 isoform X5 [Lupinus angustifolius] PREDICTED: probable ADP-ribosylation factor GTPase-activating protein AGD14 isoform X3 [Lupinus angustifolius] PREDICTED: probable ADP-ribosylation factor GTPase-activating protein AGD14 isoform X1 [Lupinus angustifolius] hypothetical protein TanjilG_30727 [Lupinus angustifolius] PREDICT…
XP_019414943.1	0.96640	1.09	1.09	2	PREDICTED: glycine dehydrogenase (decarboxylating), mitochondrial isoform X1 [Lupinus angustifolius]
XP_019461621.1+XP_019461586.1+XP_019461611.1+XP_019461603.1+OIW17933.1	0.96640	0.97	1.03	10	PREDICTED: translocase of chloroplast 159, chloroplastic-like isoform X5 [Lupinus angustifolius] PREDICTED: translocase of chloroplast 159, chloroplastic-like isoform X1 [Lupinus angustifolius] PREDICTED: translocase of chloroplast 159, chloroplastic-like isoform X4 [Lupinus angustifolius] PREDICTED: translocase of chloroplast 159, chloroplastic-like isoform X3 [Lupinus angustifolius] hypothetica…
XP_019427588.1+XP_019442902.1	0.96640	1.08	1.08	4	PREDICTED: glyceraldehyde-3-phosphate dehydrogenase A, chloroplastic-like [Lupinus angustifolius] PREDICTED: glyceraldehyde-3-phosphate dehydrogenase A, chloroplastic-like [Lupinus angustifolius]
XP_019428269.1+OIV90959.1	0.96640	1.01	1.01	8	PREDICTED: tubulin-folding cofactor D isoform X1 [Lupinus angustifolius] hypothetical protein TanjilG_16919 [Lupinus angustifolius]
XP_019415251.1+OIV98365.1	0.96646	1.00	1.00	4	PREDICTED: protein CTR9 homolog [Lupinus angustifolius] hypothetical protein TanjilG_16692 [Lupinus angustifolius]
XP_019458379.1+OIW03276.1	0.96646	0.97	1.04	6	PREDICTED: valine--tRNA ligase, chloroplastic/mitochondrial 2 [Lupinus angustifolius] hypothetical protein TanjilG_09923 [Lupinus angustifolius]
OIV98650.1+XP_019414038.1	0.96646	0.89	1.12	3	hypothetical protein TanjilG_12773 [Lupinus angustifolius] PREDICTED: desumoylating isopeptidase 1-like [Lupinus angustifolius]
XP_019415948.1	0.96646	0.94	1.06	3	PREDICTED: probable steroid-binding protein 3 [Lupinus angustifolius]
XP_019460222.1	0.96646	0.96	1.04	7	PREDICTED: 4-hydroxy-tetrahydrodipicolinate reductase 2, chloroplastic-like [Lupinus angustifolius]
XP_019413116.1+XP_019413115.1+XP_019413114.1	0.96646	1.05	1.05	2	PREDICTED: phosphoinositide phosphatase SAC8-like isoform X3 [Lupinus angustifolius] PREDICTED: phosphoinositide phosphatase SAC8-like isoform X2 [Lupinus angustifolius] PREDICTED: phosphoinositide phosphatase SAC8-like isoform X1 [Lupinus angustifolius]
XP_019416739.1+OIV96706.1	0.96683	1.02	1.02	10	PREDICTED: acetyl-CoA carboxylase 1-like [Lupinus angustifolius] hypothetical protein TanjilG_09248 [Lupinus angustifolius]
XP_019444591.1+XP_019422405.1+OIV94970.1+XP_019414104.1+XP_019423665.1+OIV92615.1	0.96683	1.03	1.03	5	PREDICTED: cellulose synthase-like protein D3 [Lupinus angustifolius] PREDICTED: cellulose synthase-like protein D3 [Lupinus angustifolius] hypothetical protein TanjilG_22167 [Lupinus angustifolius] PREDICTED: cellulose synthase-like protein D2 [Lupinus angustifolius] PREDICTED: cellulose synthase-like protein D3 [Lupinus angustifolius] hypothetical protein TanjilG_17966 [Lupinus angustifolius]
OIV92351.1+XP_019425712.1+XP_019425716.1+XP_019425715.1+XP_019425713.1	0.96683	1.03	1.03	5	hypothetical protein TanjilG_10561 [Lupinus angustifolius] PREDICTED: sister-chromatid cohesion protein 3 isoform X1 [Lupinus angustifolius] PREDICTED: sister-chromatid cohesion protein 3 isoform X4 [Lupinus angustifolius] PREDICTED: sister-chromatid cohesion protein 3 isoform X3 [Lupinus angustifolius] PREDICTED: sister-chromatid cohesion protein 3 isoform X2 [Lupinus angustifolius]
XP_019415140.1	0.96683	0.97	1.03	5	PREDICTED: delta-aminolevulinic acid dehydratase, chloroplastic-like [Lupinus angustifolius]
OIW02570.1+XP_019461317.1+XP_019431770.1	0.96683	0.97	1.03	2	hypothetical protein TanjilG_24021 [Lupinus angustifolius] PREDICTED: ATP-dependent zinc metalloprotease FTSH 9, chloroplastic-like [Lupinus angustifolius] PREDICTED: ATP-dependent zinc metalloprotease FTSH 9, chloroplastic-like [Lupinus angustifolius]
XP_019435267.1	0.96712	1.03	1.03	5	PREDICTED: eukaryotic translation initiation factor 3 subunit B-like [Lupinus angustifolius]
XP_019441348.1+XP_019452391.1+XP_019427676.1	0.96712	1.14	1.14	4	PREDICTED: vesicle-associated membrane protein 727-like [Lupinus angustifolius] PREDICTED: vesicle-associated membrane protein 727-like [Lupinus angustifolius] PREDICTED: vesicle-associated membrane protein 727 [Lupinus angustifolius]
XP_019446640.1	0.96712	1.02	1.02	3	PREDICTED: hydroxymethylglutaryl-CoA synthase-like [Lupinus angustifolius]
XP_019433896.1	0.96712	0.89	1.13	2	PREDICTED: probable peroxygenase 5 [Lupinus angustifolius]
XP_019428719.1	0.96712	1.00	1.00	2	PREDICTED: probable 6-phosphogluconolactonase 1 [Lupinus angustifolius]
XP_019452131.1	0.96712	0.99	1.01	7	PREDICTED: 6-phosphogluconate dehydrogenase, decarboxylating 3-like [Lupinus angustifolius]
OIW12786.1+XP_019439052.1	0.96712	1.00	1.00	3	hypothetical protein TanjilG_24719 [Lupinus angustifolius] PREDICTED: uncharacterized protein LOC109344757 [Lupinus angustifolius]
OIV93417.1+XP_019423929.1	0.96725	1.01	1.01	15	hypothetical protein TanjilG_02954 [Lupinus angustifolius] PREDICTED: dipeptidyl-peptidase 5 [Lupinus angustifolius]
XP_019452109.1	0.96752	1.17	1.17	4	PREDICTED: 2-oxoglutarate dehydrogenase, mitochondrial-like [Lupinus angustifolius]
XP_019444357.1	0.96768	1.02	1.02	5	PREDICTED: uncharacterized protein LOC109348395 [Lupinus angustifolius]
XP_019453058.1+XP_019453050.1+XP_019440946.1	0.96768	1.19	1.19	2	PREDICTED: protein S-acyltransferase 24-like isoform X2 [Lupinus angustifolius] PREDICTED: protein S-acyltransferase 24-like isoform X1 [Lupinus angustifolius] PREDICTED: protein S-acyltransferase 24-like [Lupinus angustifolius]
XP_019453222.1+OIW06845.1	0.96768	0.94	1.07	2	PREDICTED: protein IN2-1 homolog B-like [Lupinus angustifolius] hypothetical protein TanjilG_18227 [Lupinus angustifolius]
XP_019415629.1	0.96768	1.03	1.03	2	PREDICTED: NEDD8 ultimate buster 1 [Lupinus angustifolius]
OIV96548.1+XP_019416906.1	0.96768	0.91	1.10	2	hypothetical protein TanjilG_24201 [Lupinus angustifolius] PREDICTED: BURP domain protein RD22 [Lupinus angustifolius]
XP_019413729.1	0.96768	1.04	1.04	4	PREDICTED: uncharacterized protein LOC109325683 [Lupinus angustifolius]
XP_019447909.1	0.96785	0.97	1.03	4	PREDICTED: carbamoyl-phosphate synthase large chain, chloroplastic-like [Lupinus angustifolius]
OIV96820.1+XP_019416865.1	0.96785	1.01	1.01	2	hypothetical protein TanjilG_08681 [Lupinus angustifolius] PREDICTED: LOW QUALITY PROTEIN: glutamate synthase [NADH], amyloplastic-like [Lupinus angustifolius]
CAA03926.1	0.96785	0.87	1.16	7	PR-10 protein [Lupinus albus]
XP_019428510.1	0.96785	1.00	1.00	2	PREDICTED: superoxide dismutase [Cu-Zn] 2 [Lupinus angustifolius]
XP_019446416.1+XP_019446373.1+OIW19080.1	0.96785	0.94	1.06	4	PREDICTED: BRISC complex subunit Abro1-like isoform X2 [Lupinus angustifolius] PREDICTED: BRISC complex subunit Abro1-like isoform X1 [Lupinus angustifolius] hypothetical protein TanjilG_06389 [Lupinus angustifolius]
XP_019424712.1	0.96785	0.96	1.04	5	PREDICTED: quinone oxidoreductase PIG3-like [Lupinus angustifolius]
XP_019423288.1	0.96817	1.00	1.00	4	PREDICTED: transformation/transcription domain-associated protein-like [Lupinus angustifolius]
XP_019464244.1	0.96817	1.07	1.07	2	PREDICTED: protease Do-like 9 [Lupinus angustifolius]
XP_019446569.1+XP_019446570.1+XP_019446571.1	0.96819	1.05	1.05	5	PREDICTED: puromycin-sensitive aminopeptidase isoform X1 [Lupinus angustifolius] PREDICTED: puromycin-sensitive aminopeptidase isoform X2 [Lupinus angustifolius] PREDICTED: puromycin-sensitive aminopeptidase isoform X3 [Lupinus angustifolius]
XP_019417566.1	0.96819	1.01	1.01	9	PREDICTED: diacylglycerol kinase 5 [Lupinus angustifolius]
XP_019447437.1+XP_019447436.1+OIW09419.1+XP_019447433.1	0.96819	1.00	1.00	3	PREDICTED: uncharacterized protein LOC109350653 isoform X3 [Lupinus angustifolius] PREDICTED: uncharacterized protein LOC109350653 isoform X2 [Lupinus angustifolius] hypothetical protein TanjilG_14570 [Lupinus angustifolius] PREDICTED: uncharacterized protein LOC109350653 isoform X1 [Lupinus angustifolius]
XP_019444127.1	0.96819	0.99	1.01	6	PREDICTED: NPL4-like protein 1 [Lupinus angustifolius]
OIW08719.1+XP_019413490.1	0.96819	0.98	1.02	2	hypothetical protein TanjilG_03395 [Lupinus angustifolius] PREDICTED: adoMet-dependent rRNA methyltransferase spb1 [Lupinus angustifolius]
OIW05440.1+XP_019456709.1+XP_019456708.1	0.96819	1.01	1.01	3	hypothetical protein TanjilG_12031 [Lupinus angustifolius] PREDICTED: uncharacterized protein LOC109357298 isoform X2 [Lupinus angustifolius] PREDICTED: uncharacterized protein LOC109357298 isoform X1 [Lupinus angustifolius]
XP_019464965.1	0.96820	0.88	1.13	2	PREDICTED: xyloglucan endotransglucosylase/hydrolase protein 31 isoform X1 [Lupinus angustifolius]
OIW07812.1+XP_019449781.1	0.96820	0.99	1.01	2	hypothetical protein TanjilG_32004 [Lupinus angustifolius] PREDICTED: polyadenylate-binding protein 3-like [Lupinus angustifolius]
XP_019415575.1	0.96820	0.95	1.05	3	PREDICTED: ATP-dependent 6-phosphofructokinase 6-like isoform X1 [Lupinus angustifolius]
XP_019431200.1+OIV89893.1	0.96820	0.96	1.05	2	PREDICTED: uncharacterized protein LOC109338423 [Lupinus angustifolius] hypothetical protein TanjilG_14031 [Lupinus angustifolius]
XP_019423980.1	0.96822	1.06	1.06	2	PREDICTED: jasmonic acid-amido synthetase JAR1-like [Lupinus angustifolius]
XP_019448193.1	0.96855	0.91	1.10	5	PREDICTED: IAA-amino acid hydrolase ILR1-like 4 [Lupinus angustifolius]
XP_019427769.1+XP_019458624.1	0.96855	0.98	1.02	9	PREDICTED: uridine 5'-monophosphate synthase-like [Lupinus angustifolius] PREDICTED: uridine 5'-monophosphate synthase-like [Lupinus angustifolius]
XP_019419479.1	0.96855	1.02	1.02	13	PREDICTED: probable pre-mRNA-splicing factor ATP-dependent RNA helicase DEAH2 [Lupinus angustifolius]
XP_019418987.1	0.96856	1.02	1.02	2	PREDICTED: nardilysin-like [Lupinus angustifolius]
XP_019445491.1	0.96856	1.06	1.06	3	PREDICTED: serine hydroxymethyltransferase 4-like [Lupinus angustifolius]
XP_019459335.1	0.96856	1.02	1.02	2	PREDICTED: uncharacterized protein LOC109359214 [Lupinus angustifolius]
XP_019438241.1	0.96856	0.99	1.01	5	PREDICTED: UTP--glucose-1-phosphate uridylyltransferase-like [Lupinus angustifolius]
XP_019427058.1	0.96858	1.00	1.00	2	PREDICTED: uncharacterized protein LOC109335373 [Lupinus angustifolius]
XP_019449860.1+OIW07734.1	0.96858	1.06	1.06	2	PREDICTED: protein GPR107-like [Lupinus angustifolius] hypothetical protein TanjilG_11892 [Lupinus angustifolius]
XP_019436940.1	0.96858	0.86	1.16	2	PREDICTED: polyadenylate-binding protein 8-like [Lupinus angustifolius]
XP_019455451.1+XP_019455453.1	0.96874	1.03	1.03	5	PREDICTED: nuclear-pore anchor-like isoform X1 [Lupinus angustifolius] PREDICTED: nuclear-pore anchor-like isoform X2 [Lupinus angustifolius]
OIW13643.1+XP_019440333.1+XP_019440335.1+XP_019440334.1	0.96874	1.03	1.03	4	hypothetical protein TanjilG_07985 [Lupinus angustifolius] PREDICTED: dynamin-related protein 3A-like isoform X1 [Lupinus angustifolius] PREDICTED: dynamin-related protein 3A-like isoform X3 [Lupinus angustifolius] PREDICTED: dynamin-related protein 3A-like isoform X2 [Lupinus angustifolius]
XP_019415270.1	0.96891	1.03	1.03	2	PREDICTED: pyruvate kinase 1, cytosolic-like isoform X1 [Lupinus angustifolius]
OIW02176.1+OIW04705.1+XP_019456204.1+XP_019462333.1	0.96891	0.98	1.02	2	hypothetical protein TanjilG_02400 [Lupinus angustifolius] hypothetical protein TanjilG_07830 [Lupinus angustifolius] PREDICTED: 14-3-3-like protein GF14 iota [Lupinus angustifolius] PREDICTED: 14-3-3-like protein GF14 iota [Lupinus angustifolius]
XP_019461930.1	0.96891	0.94	1.07	2	PREDICTED: dnaJ protein homolog 1 [Lupinus angustifolius]
OIW15483.1+XP_019437073.1	0.96892	1.01	1.01	3	hypothetical protein TanjilG_32887 [Lupinus angustifolius] PREDICTED: dual specificity protein phosphatase 12-like [Lupinus angustifolius]
XP_019423846.1	0.96892	1.00	1.00	8	PREDICTED: soyasapogenol B glucuronide galactosyltransferase-like [Lupinus angustifolius]
XP_019460729.1	0.96892	1.00	1.00	4	PREDICTED: coatomer subunit alpha-2-like [Lupinus angustifolius]
XP_019437069.1+XP_019437067.1+XP_019437068.1+OIW15480.1+XP_019437066.1	0.96892	0.97	1.03	7	PREDICTED: pentatricopeptide repeat-containing protein At1g80270, mitochondrial-like isoform X4 [Lupinus angustifolius] PREDICTED: pentatricopeptide repeat-containing protein At1g80270, mitochondrial-like isoform X2 [Lupinus angustifolius] PREDICTED: pentatricopeptide repeat-containing protein At1g80270, mitochondrial-like isoform X3 [Lupinus angustifolius] hypothetical protein TanjilG_32884 [Lup…
OIW03191.1	0.96892	1.11	1.11	6	hypothetical protein TanjilG_11828 [Lupinus angustifolius]
XP_019442923.1	0.96892	1.00	1.00	3	PREDICTED: uncharacterized protein LOC109347492 [Lupinus angustifolius]
XP_019425407.1	0.96909	0.99	1.01	2	PREDICTED: lanC-like protein GCR2 [Lupinus angustifolius]
XP_019436712.1	0.96909	0.98	1.02	3	PREDICTED: guanine nucleotide-binding protein subunit beta-like protein [Lupinus angustifolius]
XP_019461463.1	0.96945	1.05	1.05	2	PREDICTED: dolichyl-diphosphooligosaccharide--protein glycosyltransferase subunit 2-like [Lupinus angustifolius]
XP_019444637.1	0.96945	1.01	1.01	5	PREDICTED: protein SEH1 [Lupinus angustifolius]
XP_019420973.1+XP_019447178.1	0.96945	1.01	1.01	12	PREDICTED: threonine dehydratase biosynthetic, chloroplastic-like isoform X1 [Lupinus angustifolius] PREDICTED: threonine dehydratase biosynthetic, chloroplastic-like [Lupinus angustifolius]
XP_019421523.1+XP_019421521.1	0.96945	1.02	1.02	4	PREDICTED: signal recognition particle receptor subunit beta-like isoform X2 [Lupinus angustifolius] PREDICTED: signal recognition particle receptor subunit beta-like isoform X1 [Lupinus angustifolius]
XP_019452390.1	0.96945	1.03	1.03	2	PREDICTED: coatomer subunit delta-like [Lupinus angustifolius]
OIW07871.1+XP_019449427.1	0.96945	1.04	1.04	14	hypothetical protein TanjilG_19972 [Lupinus angustifolius] PREDICTED: cleavage and polyadenylation specificity factor subunit 1 [Lupinus angustifolius]
XP_019447186.1+OIW19009.1+XP_019464186.1	0.96945	1.04	1.04	13	PREDICTED: 3-phosphoshikimate 1-carboxyvinyltransferase 2 [Lupinus angustifolius] hypothetical protein TanjilG_20282 [Lupinus angustifolius] PREDICTED: 3-phosphoshikimate 1-carboxyvinyltransferase 2 [Lupinus angustifolius]
XP_019440143.1	0.96945	1.00	1.00	3	PREDICTED: 30S ribosomal protein S1, chloroplastic-like [Lupinus angustifolius]
OIW01106.1+XP_019461204.1	0.96964	1.03	1.03	3	hypothetical protein TanjilG_25214 [Lupinus angustifolius] PREDICTED: polygalacturonate 4-alpha-galacturonosyltransferase-like [Lupinus angustifolius]
XP_019442952.1+OIW12148.1+XP_019442951.1	0.96979	1.06	1.06	3	PREDICTED: probable calcium-binding protein CML49 isoform X2 [Lupinus angustifolius] hypothetical protein TanjilG_28556 [Lupinus angustifolius] PREDICTED: probable calcium-binding protein CML49 isoform X1 [Lupinus angustifolius]
XP_019419644.1+XP_019419670.1+XP_019419677.1+XP_019419661.1+XP_019419685.1+XP_019419652.1	0.96979	0.99	1.01	3	PREDICTED: importin beta-like SAD2 isoform X1 [Lupinus angustifolius] PREDICTED: importin beta-like SAD2 homolog isoform X4 [Lupinus angustifolius] PREDICTED: importin beta-like SAD2 isoform X5 [Lupinus angustifolius] PREDICTED: importin beta-like SAD2 isoform X3 [Lupinus angustifolius] PREDICTED: importin beta-like SAD2 isoform X6 [Lupinus angustifolius] PREDICTED: importin beta-like SAD2 isofor…
XP_019440184.1+XP_019418941.1+XP_019425653.1+XP_019418942.1+XP_019418938.1+XP_019425655.1+XP_019425652.1+XP_019418944.1+OIW13731.1+XP_019418943.1+XP_019425651.1+XP_019418939.1	0.97014	1.05	1.05	2	PREDICTED: two-component response regulator ARR2-like [Lupinus angustifolius] PREDICTED: two-component response regulator ARR1-like isoform X3 [Lupinus angustifolius] PREDICTED: two-component response regulator ARR2-like isoform X3 [Lupinus angustifolius] PREDICTED: two-component response regulator ARR2-like isoform X4 [Lupinus angustifolius] PREDICTED: two-component response regulator ARR1-like …
XP_019421061.1	0.97014	1.02	1.02	4	PREDICTED: serine/threonine-protein kinase Nek8 [Lupinus angustifolius]
XP_019449310.1+OIW18860.1	0.97014	1.01	1.01	2	PREDICTED: serine carboxypeptidase-like 20 [Lupinus angustifolius] hypothetical protein TanjilG_25303 [Lupinus angustifolius]
XP_019462068.1	0.97153	0.96	1.04	11	PREDICTED: imidazole glycerol phosphate synthase hisHF, chloroplastic [Lupinus angustifolius]
XP_019454238.1	0.97183	0.97	1.03	3	PREDICTED: synaptotagmin-2-like [Lupinus angustifolius]
XP_019428089.1	0.97183	0.79	1.26	2	PREDICTED: malate dehydrogenase-like [Lupinus angustifolius]
XP_019430216.1+XP_019430214.1	0.97183	1.00	1.00	2	PREDICTED: RNA-binding protein 39-like isoform X6 [Lupinus angustifolius] PREDICTED: RNA-binding protein 39-like isoform X4 [Lupinus angustifolius]
OIV92595.1	0.97183	0.98	1.02	3	hypothetical protein TanjilG_07586 [Lupinus angustifolius]
XP_019454270.1	0.97183	0.98	1.02	2	PREDICTED: enoyl-[acyl-carrier-protein] reductase [NADH], chloroplastic-like [Lupinus angustifolius]
XP_019448854.1	0.97187	1.03	1.03	10	PREDICTED: mediator of RNA polymerase II transcription subunit 36a-like [Lupinus angustifolius]
OIW04726.1+XP_019454521.1	0.97187	0.98	1.02	2	hypothetical protein TanjilG_06704, partial [Lupinus angustifolius] PREDICTED: COBW domain-containing protein 1 [Lupinus angustifolius]
XP_019424108.1	0.97187	0.90	1.11	2	PREDICTED: thioredoxin reductase NTRB-like [Lupinus angustifolius]
XP_019439244.1+XP_019439245.1	0.97257	1.02	1.02	3	PREDICTED: ubiquitin-activating enzyme E1 1-like isoform X1 [Lupinus angustifolius] PREDICTED: ubiquitin-activating enzyme E1 1-like isoform X2 [Lupinus angustifolius]
XP_019419036.1	0.97257	1.02	1.02	9	PREDICTED: probable phosphoribosylformylglycinamidine synthase, chloroplastic/mitochondrial [Lupinus angustifolius]
OIV95793.1+XP_019419313.1	0.97359	0.96	1.05	3	hypothetical protein TanjilG_20243 [Lupinus angustifolius] PREDICTED: ISWI chromatin-remodeling complex ATPase CHR11-like [Lupinus angustifolius]
XP_019447018.1+OIW09546.1	0.97359	1.01	1.01	8	PREDICTED: villin-1 [Lupinus angustifolius] hypothetical protein TanjilG_30865 [Lupinus angustifolius]
XP_019445740.1	0.97359	0.95	1.05	4	PREDICTED: cysteine synthase, chloroplastic/chromoplastic-like [Lupinus angustifolius]
XP_019455523.1	0.97359	0.90	1.11	5	PREDICTED: inosine-5'-monophosphate dehydrogenase-like isoform X1 [Lupinus angustifolius]
XP_019465277.1+XP_019416057.1	0.97385	1.05	1.05	2	PREDICTED: sm-like protein LSM6A [Lupinus angustifolius] PREDICTED: U6 snRNA-associated Sm-like protein LSm6 [Lupinus angustifolius]
XP_019443914.1	0.97385	1.08	1.08	11	PREDICTED: reticulon-4-interacting protein 1, mitochondrial [Lupinus angustifolius]
XP_019462461.1	0.97385	0.96	1.05	2	PREDICTED: cyclic phosphodiesterase-like [Lupinus angustifolius]
XP_019418964.1	0.97385	0.99	1.01	6	PREDICTED: putative protease Do-like 14 isoform X2 [Lupinus angustifolius]
XP_019444225.1	0.97385	1.05	1.05	5	PREDICTED: probable aspartyl protease At4g16563 [Lupinus angustifolius]
XP_019421752.1+XP_019421754.1	0.97385	0.97	1.03	2	PREDICTED: acidic leucine-rich nuclear phosphoprotein 32-related protein isoform X1 [Lupinus angustifolius] PREDICTED: acidic leucine-rich nuclear phosphoprotein 32-related protein isoform X2 [Lupinus angustifolius]
XP_019437351.1	0.97409	0.93	1.07	3	PREDICTED: acyl-CoA-binding domain-containing protein 1-like [Lupinus angustifolius]
XP_019431715.1+XP_019456503.1	0.97409	1.02	1.02	3	PREDICTED: 40S ribosomal protein SA [Lupinus angustifolius] PREDICTED: 40S ribosomal protein SA-like [Lupinus angustifolius]
XP_019427936.1+XP_019427938.1	0.97409	1.03	1.03	3	PREDICTED: CTP synthase isoform X1 [Lupinus angustifolius] PREDICTED: CTP synthase isoform X2 [Lupinus angustifolius]
XP_019433267.1	0.97409	0.98	1.02	3	PREDICTED: serine/threonine-protein kinase SRK2I [Lupinus angustifolius]
AAO13839.1	0.97409	0.88	1.14	2	peroxidase 1, partial [Lupinus albus]
XP_019450378.1+XP_019450381.1+XP_019450383.1+XP_019450382.1+OIW07426.1	0.97424	1.02	1.02	2	PREDICTED: TOM1-like protein 1 isoform X1 [Lupinus angustifolius] PREDICTED: TOM1-like protein 1 isoform X2 [Lupinus angustifolius] PREDICTED: mediator of RNA polymerase II transcription subunit 15-like isoform X4 [Lupinus angustifolius] PREDICTED: TOM1-like protein 1 isoform X3 [Lupinus angustifolius] hypothetical protein TanjilG_19267 [Lupinus angustifolius]
XP_019435615.1+OIW16360.1	0.97424	1.02	1.02	4	PREDICTED: dihydrolipoyllysine-residue succinyltransferase component of 2-oxoglutarate dehydrogenase complex 2, mitochondrial-like [Lupinus angustifolius] hypothetical protein TanjilG_19076 [Lupinus angustifolius]
XP_019448726.1	0.97424	0.98	1.02	12	PREDICTED: protein disulfide isomerase-like 1-4 [Lupinus angustifolius]
XP_019457794.1	0.97424	0.99	1.01	3	PREDICTED: vacuolar fusion protein CCZ1 homolog [Lupinus angustifolius]
XP_019437051.1	0.97424	0.93	1.08	3	PREDICTED: NAD(P)H dehydrogenase (quinone) FQR1 [Lupinus angustifolius]
XP_019453153.1	0.97424	0.96	1.04	2	PREDICTED: apyrase 2-like [Lupinus angustifolius]
XP_019425835.1	0.97439	0.99	1.01	11	PREDICTED: importin-4 [Lupinus angustifolius]
XP_019464236.1+XP_019464237.1	0.97439	0.97	1.04	2	PREDICTED: 4-coumarate--CoA ligase 1-like isoform X1 [Lupinus angustifolius] PREDICTED: 4-coumarate--CoA ligase 1-like isoform X2 [Lupinus angustifolius]
XP_019442167.1	0.97439	0.94	1.06	2	PREDICTED: probable fructokinase-7 [Lupinus angustifolius]
OIV95863.1+XP_019419650.1	0.97439	1.00	1.00	17	hypothetical protein TanjilG_06839 [Lupinus angustifolius] PREDICTED: dihydroxy-acid dehydratase, chloroplastic [Lupinus angustifolius]
XP_019435326.1	0.97445	0.94	1.06	10	PREDICTED: uncharacterized protein LOC109341810 [Lupinus angustifolius]
XP_019448063.1	0.97445	1.03	1.03	2	PREDICTED: protein SUPPRESSOR OF K(+) TRANSPORT GROWTH DEFECT 1-like [Lupinus angustifolius]
XP_019462071.1	0.97457	1.07	1.07	2	PREDICTED: protein FATTY ACID EXPORT 3, chloroplastic [Lupinus angustifolius]
XP_019438572.1	0.97457	1.44	1.44	2	PREDICTED: lysM domain-containing GPI-anchored protein 1-like [Lupinus angustifolius]
XP_019415115.1+XP_019442934.1	0.97457	0.86	1.16	4	PREDICTED: tubulin alpha chain [Lupinus angustifolius] PREDICTED: tubulin alpha-3 chain-like [Lupinus angustifolius]
XP_019419771.1	0.97473	0.99	1.01	6	PREDICTED: DNA replication licensing factor MCM6 [Lupinus angustifolius]
XP_019431391.1+OIW20607.1	0.97473	1.03	1.03	3	PREDICTED: protein argonaute 1-like [Lupinus angustifolius] hypothetical protein TanjilG_16106 [Lupinus angustifolius]
XP_019464381.1	0.97473	0.96	1.04	11	PREDICTED: DNA replication licensing factor MCM3 [Lupinus angustifolius]
XP_019440789.1+XP_019440779.1+XP_019440781.1+XP_019440775.1+XP_019440787.1+XP_019440778.1+XP_019440784.1+XP_019440782.1+OIW13305.1+XP_019440785.1+XP_019440786.1+XP_019440777.1+XP_019440780.1+XP_019440788.1	0.97479	1.01	1.01	7	PREDICTED: transcription elongation factor SPT6-like isoform X13 [Lupinus angustifolius] PREDICTED: transcription elongation factor SPT6 homolog isoform X4 [Lupinus angustifolius] PREDICTED: transcription elongation factor SPT6 homolog isoform X6 [Lupinus angustifolius] PREDICTED: transcription elongation factor SPT6 homolog isoform X1 [Lupinus angustifolius] PREDICTED: transcription elongation f…
XP_019415143.1+OIV97812.1	0.97479	1.01	1.01	5	PREDICTED: NADP-dependent malic enzyme-like isoform X1 [Lupinus angustifolius] hypothetical protein TanjilG_12569 [Lupinus angustifolius]
XP_019415725.1	0.97479	0.96	1.04	4	PREDICTED: aminoacyl tRNA synthase complex-interacting multifunctional protein 1-like [Lupinus angustifolius]
XP_019462532.1+XP_019464798.1+OIW00754.1	0.97506	0.94	1.07	6	PREDICTED: urease accessory protein G-like [Lupinus angustifolius] PREDICTED: urease accessory protein G-like [Lupinus angustifolius] hypothetical protein TanjilG_19194 [Lupinus angustifolius]
XP_019449653.1	0.97506	0.99	1.01	12	PREDICTED: cleavage and polyadenylation specificity factor subunit 2 [Lupinus angustifolius]
XP_019446252.1	0.97506	1.03	1.03	3	PREDICTED: 40S ribosomal protein S7-like [Lupinus angustifolius]
XP_019421135.1	0.97521	1.02	1.02	3	PREDICTED: ferredoxin-thioredoxin reductase, variable chain-like [Lupinus angustifolius]
XP_019422329.1+XP_019422330.1	0.97535	1.03	1.03	3	PREDICTED: lysosomal Pro-X carboxypeptidase isoform X1 [Lupinus angustifolius] PREDICTED: lysosomal Pro-X carboxypeptidase isoform X2 [Lupinus angustifolius]
XP_019437148.1	0.97535	0.93	1.07	2	PREDICTED: protein DCL, chloroplastic-like [Lupinus angustifolius]
XP_019438626.1	0.97535	0.88	1.14	2	PREDICTED: alcohol dehydrogenase 1 [Lupinus angustifolius]
XP_019444880.1+OIW11083.1	0.97535	1.00	1.00	3	PREDICTED: protein GRIP-like [Lupinus angustifolius] hypothetical protein TanjilG_22890 [Lupinus angustifolius]
XP_019435653.1+OIW16382.1	0.97535	1.08	1.08	9	PREDICTED: glycerophosphodiester phosphodiesterase GDPDL3-like [Lupinus angustifolius] hypothetical protein TanjilG_19098 [Lupinus angustifolius]
XP_019448067.1	0.97546	0.95	1.06	3	PREDICTED: 3-isopropylmalate dehydrogenase, chloroplastic-like [Lupinus angustifolius]
XP_019441001.1+XP_019441000.1	0.97605	0.95	1.06	2	PREDICTED: protein BTR1-like isoform X2 [Lupinus angustifolius] PREDICTED: protein BTR1-like isoform X1 [Lupinus angustifolius]
OIW21658.1+XP_019433522.1	0.97605	0.98	1.02	2	hypothetical protein TanjilG_07187 [Lupinus angustifolius] PREDICTED: 28 kDa ribonucleoprotein, chloroplastic-like [Lupinus angustifolius]
XP_019425294.1	0.97708	1.02	1.02	2	PREDICTED: THO complex subunit 1 [Lupinus angustifolius]
XP_019446764.1	0.97708	1.02	1.02	5	PREDICTED: LOW QUALITY PROTEIN: pyridine nucleotide-disulfide oxidoreductase domain-containing protein 2 [Lupinus angustifolius]
XP_019452611.1+OIV91270.1+XP_019428497.1+OIW12737.1+XP_019441717.1	0.97708	1.05	1.05	29	PREDICTED: V-type proton ATPase subunit B2-like [Lupinus angustifolius] hypothetical protein TanjilG_30492 [Lupinus angustifolius] PREDICTED: V-type proton ATPase subunit B 2-like [Lupinus angustifolius] hypothetical protein TanjilG_24670 [Lupinus angustifolius] PREDICTED: V-type proton ATPase subunit B 2 [Lupinus angustifolius]
XP_019428848.1	0.97708	0.94	1.06	3	PREDICTED: eukaryotic translation initiation factor 3 subunit M [Lupinus angustifolius]
XP_019458341.1+OIW03910.1	0.97708	1.00	1.00	4	PREDICTED: alpha-L-fucosidase 1 [Lupinus angustifolius] hypothetical protein TanjilG_30186 [Lupinus angustifolius]
XP_019416060.1	0.97708	0.87	1.15	2	PREDICTED: ubiquitin-fold modifier 1 [Lupinus angustifolius]
XP_019449086.1	0.97708	1.03	1.03	4	PREDICTED: uncharacterized protein LOC109351870 [Lupinus angustifolius]
XP_019436458.1+XP_019458538.1	0.97754	0.94	1.06	3	PREDICTED: NADP-dependent malic enzyme-like isoform X1 [Lupinus angustifolius] PREDICTED: NADP-dependent malic enzyme-like [Lupinus angustifolius]
XP_019433852.1+XP_019433860.1	0.97754	0.91	1.10	2	PREDICTED: protein EARLY RESPONSIVE TO DEHYDRATION 15-like isoform X1 [Lupinus angustifolius] PREDICTED: protein EARLY RESPONSIVE TO DEHYDRATION 15-like isoform X2 [Lupinus angustifolius]
XP_019462387.1	0.97754	1.02	1.02	3	PREDICTED: N-acetyl-D-glucosamine kinase [Lupinus angustifolius]
OIV91870.1+XP_019426320.1	0.97767	1.01	1.01	2	hypothetical protein TanjilG_17862 [Lupinus angustifolius] PREDICTED: SEC14 cytosolic factor-like [Lupinus angustifolius]
XP_019441915.1	0.97767	0.94	1.06	4	PREDICTED: flowering locus K homology domain-like [Lupinus angustifolius]
OIW05671.1	0.97767	1.02	1.02	6	hypothetical protein TanjilG_23457 [Lupinus angustifolius]
YP_008963590.1+YP_009127515.1	0.97767	1.06	1.06	11	ATP synthase CF1 alpha subunit (chloroplast) [Lupinus luteus] ATP synthase CF1 alpha subunit (chloroplast) [Lupinus albus]
XP_019462649.1	0.97785	0.97	1.03	3	PREDICTED: RNA-binding protein 39-like [Lupinus angustifolius]
XP_019431135.1+XP_019431133.1	0.97785	1.05	1.05	2	PREDICTED: calcium-transporting ATPase 8, plasma membrane-type-like isoform X2 [Lupinus angustifolius] PREDICTED: calcium-transporting ATPase 8, plasma membrane-type-like isoform X1 [Lupinus angustifolius]
XP_019428158.1+OIV91182.1	0.97785	1.00	1.00	2	PREDICTED: importin beta-like SAD2 [Lupinus angustifolius] hypothetical protein TanjilG_30404 [Lupinus angustifolius]
XP_019461614.1	0.97785	0.96	1.04	10	PREDICTED: uncharacterized oxidoreductase At4g09670 [Lupinus angustifolius]
OIV92277.1+XP_019424739.1	0.97785	0.94	1.07	3	hypothetical protein TanjilG_00295 [Lupinus angustifolius] PREDICTED: putative deoxyribonuclease TATDN1 [Lupinus angustifolius]
XP_019416525.1+OIV97509.1	0.97786	0.91	1.10	3	PREDICTED: chaperone protein dnaJ A6, chloroplastic-like [Lupinus angustifolius] hypothetical protein TanjilG_11033 [Lupinus angustifolius]
XP_019424061.1	0.97786	1.03	1.03	3	PREDICTED: uncharacterized protein LOC109333188 isoform X1 [Lupinus angustifolius]
XP_019463693.1+XP_019463689.1+XP_019463688.1	0.97786	1.07	1.07	2	PREDICTED: nucleolin-like isoform X3 [Lupinus angustifolius] PREDICTED: nucleolin-like isoform X2 [Lupinus angustifolius] PREDICTED: nucleolin-like isoform X1 [Lupinus angustifolius]
XP_019454049.1	0.97790	0.97	1.03	2	PREDICTED: UDP-glucuronic acid decarboxylase 6-like [Lupinus angustifolius]
XP_019464240.1+XP_019464242.1	0.97790	0.93	1.08	3	PREDICTED: importin beta-like SAD2 homolog isoform X1 [Lupinus angustifolius] PREDICTED: importin beta-like SAD2 homolog isoform X2 [Lupinus angustifolius]
XP_019455423.1	0.97798	0.98	1.02	6	PREDICTED: 14-3-3-like protein A [Lupinus angustifolius]
XP_019449957.1+OIW07703.1	0.97798	0.94	1.07	3	PREDICTED: cyanate hydratase [Lupinus angustifolius] hypothetical protein TanjilG_30780 [Lupinus angustifolius]
XP_019453780.1+OIV99207.1+XP_019413160.1+XP_019458745.1	0.97798	1.03	1.03	9	PREDICTED: aconitate hydratase, cytoplasmic-like [Lupinus angustifolius] hypothetical protein TanjilG_06512 [Lupinus angustifolius] PREDICTED: aconitate hydratase, cytoplasmic [Lupinus angustifolius] PREDICTED: aconitate hydratase, cytoplasmic-like [Lupinus angustifolius]
XP_019416881.1	0.97813	1.08	1.08	3	PREDICTED: callose synthase 10 [Lupinus angustifolius]
XP_019415484.1	0.97813	1.00	1.00	2	PREDICTED: polypyrimidine tract-binding protein homolog 2-like [Lupinus angustifolius]
XP_019423842.1+OIV93055.1+XP_019423840.1	0.97813	0.98	1.02	2	PREDICTED: uncharacterized protein LOC109333054 isoform X2 [Lupinus angustifolius] hypothetical protein TanjilG_20717 [Lupinus angustifolius] PREDICTED: uncharacterized protein LOC109333054 isoform X1 [Lupinus angustifolius]
XP_019427697.1	0.97813	0.90	1.11	2	PREDICTED: outer plastidial membrane protein porin-like [Lupinus angustifolius]
XP_019415217.1+XP_019415218.1+XP_019415216.1+OIV97990.1+XP_019415219.1	0.97818	1.01	1.01	3	PREDICTED: putative transcription elongation factor SPT5 homolog 1 isoform X2 [Lupinus angustifolius] PREDICTED: putative transcription elongation factor SPT5 homolog 1 isoform X3 [Lupinus angustifolius] PREDICTED: putative transcription elongation factor SPT5 homolog 1 isoform X1 [Lupinus angustifolius] hypothetical protein TanjilG_14090 [Lupinus angustifolius] PREDICTED: putative transcription …
XP_019429300.1+XP_019430315.1	0.97818	1.00	1.00	8	PREDICTED: mitochondrial-processing peptidase subunit alpha-like isoform X1 [Lupinus angustifolius] PREDICTED: mitochondrial-processing peptidase subunit alpha-like [Lupinus angustifolius]
XP_019443157.1	0.97818	0.96	1.05	2	PREDICTED: 40S ribosomal protein S3-3-like [Lupinus angustifolius]
XP_019454688.1	0.97830	0.96	1.04	16	PREDICTED: SNF1-related protein kinase regulatory subunit gamma-1-like [Lupinus angustifolius]
OIV90155.1+XP_019428776.1	0.97830	0.99	1.01	13	hypothetical protein TanjilG_01609 [Lupinus angustifolius] PREDICTED: T-complex protein 1 subunit zeta 1 [Lupinus angustifolius]
XP_019462172.1+XP_019459760.1	0.97830	1.02	1.02	2	PREDICTED: ras-related protein RABH1e-like [Lupinus angustifolius] PREDICTED: ras-related protein RABH1e [Lupinus angustifolius]
OIW12377.1+XP_019442522.1	0.97832	1.02	1.02	5	hypothetical protein TanjilG_04126 [Lupinus angustifolius] PREDICTED: nuclear pore complex protein GP210 [Lupinus angustifolius]
XP_019417811.1	0.97832	0.92	1.09	3	PREDICTED: cytochrome b5-like [Lupinus angustifolius]
XP_019449678.1+XP_019449676.1+XP_019449679.1+XP_019449677.1	0.97832	0.94	1.06	4	PREDICTED: BAHD acyltransferase DCR-like isoform X3 [Lupinus angustifolius] PREDICTED: BAHD acyltransferase DCR-like isoform X1 [Lupinus angustifolius] PREDICTED: BAHD acyltransferase DCR-like isoform X4 [Lupinus angustifolius] PREDICTED: BAHD acyltransferase DCR-like isoform X2 [Lupinus angustifolius]
XP_019453632.1	0.97832	0.95	1.05	2	PREDICTED: U3 small nucleolar RNA-associated protein 18 homolog [Lupinus angustifolius]
XP_019454848.1+XP_019454834.1	0.97850	1.06	1.06	7	PREDICTED: zinc finger CCCH domain-containing protein 64 isoform X2 [Lupinus angustifolius] PREDICTED: zinc finger CCCH domain-containing protein 64 isoform X1 [Lupinus angustifolius]
XP_019433442.1	0.97850	1.01	1.01	4	PREDICTED: peroxisomal fatty acid beta-oxidation multifunctional protein MFP2-like [Lupinus angustifolius]
XP_019439554.1	0.97850	0.91	1.09	2	PREDICTED: protein TIC 40, chloroplastic-like [Lupinus angustifolius]
XP_019423731.1+OIV93364.1	0.97853	1.04	1.04	6	PREDICTED: peroxisomal acyl-coenzyme A oxidase 1-like isoform X1 [Lupinus angustifolius] hypothetical protein TanjilG_21075 [Lupinus angustifolius]
XP_019429449.1+XP_019458296.1	0.97853	1.04	1.04	4	PREDICTED: histone-lysine N-methyltransferase, H3 lysine-9 specific SUVH1-like [Lupinus angustifolius] PREDICTED: histone-lysine N-methyltransferase, H3 lysine-9 specific SUVH1-like [Lupinus angustifolius]
XP_019458315.1	0.97853	1.00	1.00	2	PREDICTED: receptor-like protein kinase HERK 1 [Lupinus angustifolius]
XP_019447638.1	0.97853	0.92	1.08	2	PREDICTED: ubiquitin receptor RAD23b-like [Lupinus angustifolius]
XP_019443738.1	0.97872	0.99	1.01	3	PREDICTED: uncharacterized protein LOC109348018 [Lupinus angustifolius]
XP_019417708.1	0.97872	1.01	1.01	4	PREDICTED: glycerol kinase-like [Lupinus angustifolius]
XP_019446741.1+XP_019446740.1	0.97877	1.00	1.00	2	PREDICTED: 3-ketodihydrosphingosine reductase-like isoform X2 [Lupinus angustifolius] PREDICTED: 3-ketodihydrosphingosine reductase-like isoform X1 [Lupinus angustifolius]
OIV95628.1+XP_019420047.1	0.97877	0.99	1.01	8	hypothetical protein TanjilG_23859 [Lupinus angustifolius] PREDICTED: pyridoxal kinase [Lupinus angustifolius]
XP_019437805.1	0.97877	1.02	1.02	3	PREDICTED: probable protein phosphatase 2C 60 [Lupinus angustifolius]
OIW03311.1+XP_019459008.1	0.97877	1.00	1.00	3	hypothetical protein TanjilG_16460 [Lupinus angustifolius] PREDICTED: solanesyl diphosphate synthase 3, chloroplastic/mitochondrial-like [Lupinus angustifolius]
XP_019444664.1	0.97896	1.11	1.11	3	PREDICTED: probable aquaporin PIP1-2 [Lupinus angustifolius]
XP_019464465.1	0.97896	1.01	1.01	5	PREDICTED: guanosine nucleotide diphosphate dissociation inhibitor 2-like [Lupinus angustifolius]
XP_019450360.1+OIW18422.1	0.97961	1.02	1.02	3	PREDICTED: mitotic spindle checkpoint protein MAD1 [Lupinus angustifolius] hypothetical protein TanjilG_13174 [Lupinus angustifolius]
OIW06888.1+XP_019452485.1	0.97967	1.02	1.02	7	hypothetical protein TanjilG_19537 [Lupinus angustifolius] PREDICTED: vacuolar-sorting receptor 1 [Lupinus angustifolius]
XP_019462445.1	0.97967	1.02	1.02	2	PREDICTED: pathogenesis-related protein STH-2-like [Lupinus angustifolius]
XP_019430715.1+XP_019458763.1	0.97967	0.87	1.15	2	PREDICTED: probable protein phosphatase 2C 12 [Lupinus angustifolius] PREDICTED: probable protein phosphatase 2C 12 [Lupinus angustifolius]
XP_019418954.1	0.97967	0.98	1.02	2	PREDICTED: cell division cycle 5-like protein [Lupinus angustifolius]
XP_019445735.1+OIW10149.1	0.97967	1.01	1.01	2	PREDICTED: acyl-coenzyme A thioesterase 9, mitochondrial-like [Lupinus angustifolius] hypothetical protein TanjilG_27900 [Lupinus angustifolius]
XP_019461134.1+OIW02082.1	0.97967	0.99	1.01	3	PREDICTED: exosome complex exonuclease RRP44 homolog A [Lupinus angustifolius] hypothetical protein TanjilG_14781 [Lupinus angustifolius]
XP_019442647.1	0.97992	1.10	1.10	2	PREDICTED: thyroid adenoma-associated protein homolog [Lupinus angustifolius]
XP_019461786.1	0.97992	1.00	1.00	3	PREDICTED: serine/threonine-protein phosphatase 5-like [Lupinus angustifolius]
XP_019464184.1+OIW00293.1	0.97992	0.92	1.08	5	PREDICTED: 28 kDa ribonucleoprotein, chloroplastic-like [Lupinus angustifolius] hypothetical protein TanjilG_27544 [Lupinus angustifolius]
OIW01021.1+XP_019464067.1	0.97992	1.00	1.00	2	hypothetical protein TanjilG_14204 [Lupinus angustifolius] PREDICTED: sterol 3-beta-glucosyltransferase UGT80A2-like [Lupinus angustifolius]
XP_019460928.1	0.97992	1.00	1.00	6	PREDICTED: uncharacterized protein LOC109360462 [Lupinus angustifolius]
XP_019440430.1+XP_019440433.1	0.97992	0.98	1.02	3	PREDICTED: hydroquinone glucosyltransferase-like isoform X1 [Lupinus angustifolius] PREDICTED: hydroquinone glucosyltransferase-like isoform X3 [Lupinus angustifolius]
XP_019426299.1	0.97998	1.02	1.02	6	PREDICTED: 2-hydroxyisoflavanone synthase-like [Lupinus angustifolius]
XP_019443690.1+OIW11700.1	0.97998	1.02	1.02	4	PREDICTED: succinate-semialdehyde dehydrogenase, mitochondrial-like [Lupinus angustifolius] hypothetical protein TanjilG_12219 [Lupinus angustifolius]
OIW16846.1+XP_019428054.1	0.97998	1.06	1.06	2	hypothetical protein TanjilG_31247 [Lupinus angustifolius] PREDICTED: peroxisomal adenine nucleotide carrier 1 [Lupinus angustifolius]
XP_019416840.1	0.98029	1.04	1.04	8	PREDICTED: clathrin heavy chain 1 [Lupinus angustifolius]
OIV90323.1	0.98029	1.05	1.05	4	hypothetical protein TanjilG_14721 [Lupinus angustifolius]
XP_019446611.1	0.98029	1.00	1.00	2	PREDICTED: lysophospholipid acyltransferase 1-like [Lupinus angustifolius]
OIV92531.1+XP_019431246.1+OIV89889.1	0.98072	1.00	1.00	7	hypothetical protein TanjilG_02294 [Lupinus angustifolius] PREDICTED: isocitrate dehydrogenase [NADP]-like [Lupinus angustifolius] hypothetical protein TanjilG_14345 [Lupinus angustifolius]
XP_019448400.1	0.98072	0.93	1.08	3	PREDICTED: fe-S cluster assembly factor HCF101, chloroplastic [Lupinus angustifolius]
XP_019436463.1	0.98072	0.99	1.01	8	PREDICTED: clavaminate synthase-like protein At3g21360 [Lupinus angustifolius]
XP_019447836.1+OIW09130.1	0.98072	1.02	1.02	2	PREDICTED: lysM domain receptor-like kinase 3 [Lupinus angustifolius] hypothetical protein TanjilG_11268 [Lupinus angustifolius]
XP_019462125.1	0.98072	0.84	1.19	3	PREDICTED: ran-binding protein 1 homolog b-like [Lupinus angustifolius]
XP_019426310.1+XP_019426308.1+XP_019426309.1	0.98085	0.92	1.09	3	PREDICTED: serine/threonine-protein phosphatase 5-like isoform X3 [Lupinus angustifolius] PREDICTED: serine/threonine-protein phosphatase 5-like isoform X1 [Lupinus angustifolius] PREDICTED: serine/threonine-protein phosphatase 5-like isoform X2 [Lupinus angustifolius]
XP_019457296.1	0.98085	0.95	1.05	2	PREDICTED: NAD(P)H dehydrogenase (quinone) FQR1-like [Lupinus angustifolius]
XP_019429844.1+XP_019436961.1	0.98085	0.91	1.10	3	PREDICTED: LIM domain-containing protein WLIM1-like [Lupinus angustifolius] PREDICTED: LIM domain-containing protein WLIM1-like [Lupinus angustifolius]
XP_019443000.1	0.98085	0.90	1.11	12	PREDICTED: ubiquitin-conjugating enzyme E2 variant 1D [Lupinus angustifolius]
OIW15234.1+XP_019437402.1	0.98103	1.07	1.07	2	hypothetical protein TanjilG_17554 [Lupinus angustifolius] PREDICTED: omega-hydroxypalmitate O-feruloyl transferase-like [Lupinus angustifolius]
[truncated: 1,556 more rows]

## Sheet: (A) White lupin, +S ̸ -S
Table S1. Full proteomics data (iTRAQ) for embryonic axes isolated from white lupin (a) and Andean lupin (b) germinating seeds and cultured in vitro for 96 h on a medium with (+S) and without (-S) 60 mM sucrose. Culture media were also enriched with 35 mM asparagine (+Asn). Sheets show relations in protein levels between embryonic axes in the following pairs: +S/+S+Asn, +S/-S, and -S/-S+Asn. Stat…
protein	q-value	ratio A/B	fold change	peptides	description
XP_019419464.1+XP_019432667.1	6e-05	1.63	1.63	13	PREDICTED: glutamate decarboxylase-like OS=Lupinus angustifolius;PREDICTED: glutamate decarboxylase 1-like OS=Lupinus angustifolius
XP_019415594.1	6e-05	0.63	1.59	12	PREDICTED: xylose isomerase isoform X2 OS=Lupinus angustifolius
XP_019433306.1+XP_019433304.1+XP_019433305.1	6e-05	0.53	1.89	11	PREDICTED: embryonic protein DC-8-like isoform X3 OS=Lupinus angustifolius;PREDICTED: embryonic protein DC-8-like isoform X1 OS=Lupinus angustifolius;PREDICTED: embryonic protein DC-8-like isoform X2 OS=Lupinus angustifolius
XP_019454688.1	6e-05	0.58	1.72	12	PREDICTED: SNF1-related protein kinase regulatory subunit gamma-1-like OS=Lupinus angustifolius
Q53HY0.2	6e-05	0.34	2.97	9	Conglutin beta 1
XP_019429289.1	6e-05	0.68	1.48	13	PREDICTED: beta-xylosidase/alpha-L-arabinofuranosidase 2 OS=Lupinus angustifolius
XP_019425785.1	6e-05	0.38	2.61	8	PREDICTED: beta-D-xylosidase 1-like OS=Lupinus angustifolius
XP_019416596.1	6e-05	1.74	1.74	8	PREDICTED: serine hydroxymethyltransferase 4 OS=Lupinus angustifolius
XP_019438275.1+Q9SP37.1+XP_019416594.1	6e-05	2.12	2.12	16	PREDICTED: adenosylhomocysteinase OS=Lupinus angustifolius;Adenosylhomocysteinase;PREDICTED: adenosylhomocysteinase-like OS=Lupinus angustifolius
XP_019446555.1+OIW08074.1+XP_019449732.1+XP_019449729.1+XP_019449731.1+XP_019449730.1+XP_019421534.1+(3 more)	6e-05	0.49	2.03	23	PREDICTED: uncharacterized AAA domain-containing protein C16E9.10c-like OS=Lupinus angustifolius;hypothetical protein TanjilG_20175 OS=Lupinus angustifolius;PREDICTED: uncharacterized protein LOC109352274 isoform X4 OS=Lupinus angustifolius;PREDICTED: uncharacterized protein LOC109352274 isoform X1 OS=Lupinus angustifolius;PREDICTED: uncharacterized protein LOC109352274 isoform X3 OS=Lupinus angu…
XP_019443961.1	6e-05	0.64	1.55	13	PREDICTED: stem-specific protein TSJT1 OS=Lupinus angustifolius
XP_019449386.1+OIW08089.1	6e-05	0.6	1.66	13	PREDICTED: annexin-like protein RJ4 OS=Lupinus angustifolius;hypothetical protein TanjilG_21069 OS=Lupinus angustifolius
XP_019445788.1	6e-05	1.4	1.4	14	PREDICTED: ferredoxin--nitrite reductase, chloroplastic-like OS=Lupinus angustifolius
XP_019451151.1	6e-05	0.59	1.7	28	PREDICTED: poly [ADP-ribose] polymerase 3 OS=Lupinus angustifolius
XP_019428946.1	6e-05	0.36	2.81	8	PREDICTED: basic 7S globulin-like OS=Lupinus angustifolius
XP_019413578.1	6e-05	1.4	1.4	12	PREDICTED: probable methylenetetrahydrofolate reductase OS=Lupinus angustifolius
XP_019449065.1+XP_019449063.1+XP_019449064.1+XP_019449066.1+XP_019449061.1+XP_019449062.1	6e-05	0.36	2.77	9	PREDICTED: seed biotin-containing protein SBP65-like isoform X5 OS=Lupinus angustifolius;PREDICTED: seed biotin-containing protein SBP65-like isoform X3 OS=Lupinus angustifolius;PREDICTED: seed biotin-containing protein SBP65-like isoform X4 OS=Lupinus angustifolius;PREDICTED: seed biotin-containing protein SBP65-like isoform X6 OS=Lupinus angustifolius;PREDICTED: seed biotin-containing protein S…
XP_019441108.1	6e-05	2.19	2.19	7	PREDICTED: uncharacterized protein LOC109346158 OS=Lupinus angustifolius
XP_019450975.1	6e-05	0.64	1.56	13	PREDICTED: senescence/dehydration-associated protein At4g35985, chloroplastic-like OS=Lupinus angustifolius
XP_019445688.1	6e-05	2.12	2.12	12	PREDICTED: 2-hydroxyisoflavanone synthase OS=Lupinus angustifolius
XP_019425373.1	6e-05	1.46	1.46	12	PREDICTED: soyasaponin III rhamnosyltransferase-like OS=Lupinus angustifolius
XP_019453901.1	6e-05	2.17	2.17	7	PREDICTED: glucomannan 4-beta-mannosyltransferase 2-like OS=Lupinus angustifolius
XP_019455443.1	6e-05	0.63	1.58	14	PREDICTED: alpha-aminoadipic semialdehyde synthase OS=Lupinus angustifolius
OIW08989.1+XP_019448240.1	6e-05	2.26	2.26	19	hypothetical protein TanjilG_05965 OS=Lupinus angustifolius;PREDICTED: linoleate 9S-lipoxygenase-like OS=Lupinus angustifolius
XP_019422888.1+XP_019446602.1	6e-05	0.56	1.78	18	PREDICTED: bifunctional UDP-glucose 4-epimerase and UDP-xylose 4-epimerase 1-like OS=Lupinus angustifolius;PREDICTED: bifunctional UDP-glucose 4-epimerase and UDP-xylose 4-epimerase 1 OS=Lupinus angustifolius
XP_019440520.1+XP_019440512.1	6e-05	0.44	2.29	21	PREDICTED: probable galactinol--sucrose galactosyltransferase 6 isoform X2 OS=Lupinus angustifolius;PREDICTED: probable galactinol--sucrose galactosyltransferase 6 isoform X1 OS=Lupinus angustifolius
XP_019450492.1	6e-05	0.35	2.83	7	PREDICTED: aldose reductase-like OS=Lupinus angustifolius
XP_019455950.1	6e-05	0.62	1.61	10	PREDICTED: serine--glyoxylate aminotransferase OS=Lupinus angustifolius
XP_019448719.1+OIW08580.1	6e-05	0.63	1.59	13	PREDICTED: isovaleryl-CoA dehydrogenase, mitochondrial-like OS=Lupinus angustifolius;hypothetical protein TanjilG_03256 OS=Lupinus angustifolius
XP_019420991.1+XP_019420992.1+ABF59866.1+ABV23279.1+XP_019444595.1	6e-05	1.59	1.59	18	PREDICTED: chalcone synthase 1-like OS=Lupinus angustifolius;PREDICTED: chalcone synthase 1-like OS=Lupinus angustifolius;chalcone synthase OS=Lupinus luteus;chalcone synthase OS=Lupinus albus;PREDICTED: chalcone synthase 1 OS=Lupinus angustifolius
OIW04162.1+XP_019455891.1+XP_019434369.1	6e-05	1.35	1.35	29	hypothetical protein TanjilG_00722 OS=Lupinus angustifolius;PREDICTED: protein argonaute 4-like OS=Lupinus angustifolius;PREDICTED: protein argonaute 4A-like OS=Lupinus angustifolius
XP_019443511.1	6e-05	1.93	1.93	25	PREDICTED: seed linoleate 9S-lipoxygenase-2-like OS=Lupinus angustifolius
OIV95384.1+XP_019419501.1	6e-05	0.76	1.31	27	hypothetical protein TanjilG_14538 OS=Lupinus angustifolius;PREDICTED: sucrose synthase 2 isoform X1 OS=Lupinus angustifolius
XP_019453182.1+XP_019453181.1	6e-05	0.71	1.4	31	PREDICTED: tripeptidyl-peptidase 2-like isoform X2 OS=Lupinus angustifolius;PREDICTED: tripeptidyl-peptidase 2-like isoform X1 OS=Lupinus angustifolius
XP_019437609.1+XP_019415132.1+XP_019416645.1	6e-05	1.45	1.45	13	PREDICTED: inositol-3-phosphate synthase-like OS=Lupinus angustifolius;PREDICTED: inositol-3-phosphate synthase OS=Lupinus angustifolius;PREDICTED: inositol-3-phosphate synthase-like OS=Lupinus angustifolius
XP_019429896.1+OIW19836.1	6e-05	1.47	1.47	16	PREDICTED: monodehydroascorbate reductase 5, mitochondrial OS=Lupinus angustifolius;hypothetical protein TanjilG_24549 OS=Lupinus angustifolius
OIW09797.1+XP_019446690.1	6e-05	0.61	1.64	9	hypothetical protein TanjilG_32235 OS=Lupinus angustifolius;PREDICTED: uncharacterized protein LOC109350034 OS=Lupinus angustifolius
XP_019416317.1	6e-05	0.51	1.95	9	PREDICTED: 17.9 kDa class II heat shock protein-like OS=Lupinus angustifolius
XP_019442749.1+XP_019442751.1+XP_019452981.1	6e-05	1.17	1.17	46	PREDICTED: auxin transport protein BIG-like isoform X1 OS=Lupinus angustifolius;PREDICTED: auxin transport protein BIG-like isoform X2 OS=Lupinus angustifolius;PREDICTED: auxin transport protein BIG OS=Lupinus angustifolius
XP_019415220.1	6e-05	1.31	1.31	17	PREDICTED: ribonuclease TUDOR 1-like OS=Lupinus angustifolius
XP_019446061.1	6e-05	0.55	1.82	11	PREDICTED: acyl-coenzyme A oxidase 4, peroxisomal-like OS=Lupinus angustifolius
XP_019460997.1+XP_019449461.1+XP_019413823.1+P16121.2+XP_019455582.1+XP_019444400.1	6e-05	1.37	1.37	35	PREDICTED: heat shock cognate 70 kDa protein 2-like OS=Lupinus angustifolius;PREDICTED: heat shock cognate 70 kDa protein 2-like OS=Lupinus angustifolius;PREDICTED: heat shock cognate 70 kDa protein 2 OS=Lupinus angustifolius;Heat shock 70 kDa protein;PREDICTED: heat shock cognate 70 kDa protein 2-like OS=Lupinus angustifolius;PREDICTED: heat shock cognate 70 kDa protein 2-like OS=Lupinus angusti…
XP_019442188.1	6e-05	0.26	3.89	10	PREDICTED: late embryogenesis abundant protein D-34-like OS=Lupinus angustifolius
XP_019425317.1	6e-05	3.34	3.34	23	PREDICTED: linoleate 9S-lipoxygenase-like OS=Lupinus angustifolius
XP_019457935.1	6e-05	0.56	1.79	9	PREDICTED: aldose 1-epimerase-like OS=Lupinus angustifolius
XP_019441866.1	6e-05	0.24	4.22	8	PREDICTED: late embryogenesis abundant protein D-34-like OS=Lupinus angustifolius
AAV74197.1+XP_019428476.1	6e-05	0.27	3.67	9	glutamate dehydrogenase 1 OS=Lupinus luteus;PREDICTED: glutamate dehydrogenase 1-like OS=Lupinus angustifolius
XP_019455724.1+XP_019431949.1+XP_019460282.1	6e-05	1.27	1.27	29	PREDICTED: clathrin heavy chain 1-like OS=Lupinus angustifolius;PREDICTED: clathrin heavy chain 2-like OS=Lupinus angustifolius;PREDICTED: clathrin heavy chain 2-like isoform X1 OS=Lupinus angustifolius
XP_019425253.1	6e-05	0.23	4.42	11	PREDICTED: epidermis-specific secreted glycoprotein EP1-like OS=Lupinus angustifolius
XP_019437027.1	6e-05	0.27	3.66	12	PREDICTED: seed biotin-containing protein SBP65-like OS=Lupinus angustifolius
XP_019424457.1	6e-05	0.52	1.93	10	PREDICTED: aldehyde dehydrogenase family 2 member B7, mitochondrial-like OS=Lupinus angustifolius
XP_019435583.1	6e-05	1.58	1.58	11	PREDICTED: probable methyltransferase PMT27 OS=Lupinus angustifolius
XP_019439913.1+XP_019439914.1	6e-05	0.29	3.45	5	PREDICTED: probable low-specificity L-threonine aldolase 1 isoform X1 OS=Lupinus angustifolius;PREDICTED: probable low-specificity L-threonine aldolase 1 isoform X2 OS=Lupinus angustifolius
XP_019424649.1+XP_019443495.1	6e-05	1.48	1.48	13	PREDICTED: transmembrane 9 superfamily member 7-like OS=Lupinus angustifolius;PREDICTED: transmembrane 9 superfamily member 7 OS=Lupinus angustifolius
XP_019430110.1+OIW19935.1	6e-05	0.7	1.42	21	PREDICTED: probable alpha-mannosidase At5g13980 OS=Lupinus angustifolius;hypothetical protein TanjilG_30849 OS=Lupinus angustifolius
ABB13526.1+Q6EBC1.1	6e-05	0.47	2.13	12	BLAD, partial OS=Lupinus albus;Conglutin beta 2
XP_019462324.1	6e-05	0.39	2.58	8	PREDICTED: desiccation protectant protein Lea14 homolog OS=Lupinus angustifolius
XP_019455488.1+XP_019455489.1	6e-05	1.93	1.93	10	PREDICTED: linoleate 9S-lipoxygenase 1-like isoform X1 OS=Lupinus angustifolius; PREDICTED: linoleate 9S-lipoxygenase 1-like isoform X2 OS=Lupinus angustifolius
XP_019463962.1	6e-05	0.58	1.74	12	PREDICTED: oil body-associated protein 2A-like OS=Lupinus angustifolius
XP_019416641.1	6e-05	1.31	1.31	26	PREDICTED: uncharacterized protein LOC109327919 isoform X1 OS=Lupinus angustifolius
XP_019414857.1	6e-05	1.23	1.23	23	PREDICTED: acetyl-CoA carboxylase 1-like OS=Lupinus angustifolius
XP_019458145.1	6e-05	1.65	1.65	15	PREDICTED: beta-galactosidase 5-like OS=Lupinus angustifolius
AIW63722.1+XP_019445329.1	0.00012	0.51	1.96	7	phosphoenolpyruvate carboxykinase, partial OS=Lupinus luteus;PREDICTED: phosphoenolpyruvate carboxykinase [ATP]-like OS=Lupinus angustifolius
XP_019426299.1	0.00012	1.64	1.64	10	PREDICTED: 2-hydroxyisoflavanone synthase-like OS=Lupinus angustifolius
XP_019447409.1	0.00012	0.73	1.37	15	PREDICTED: probable alpha-mannosidase At5g13980 OS=Lupinus angustifolius
XP_019419809.1+OIV95073.1+XP_019439262.1	0.00012	0.81	1.24	20	PREDICTED: uncharacterized protein LOC109330192 OS=Lupinus angustifolius;hypothetical protein TanjilG_10893 OS=Lupinus angustifolius;PREDICTED: uncharacterized protein LOC109344977 OS=Lupinus angustifolius
XP_019442183.1+XP_019442182.1	0.00012	0.39	2.57	5	PREDICTED: homocysteine S-methyltransferase 3-like isoform X2 OS=Lupinus angustifolius;PREDICTED: homocysteine S-methyltransferase 3-like isoform X1 OS=Lupinus angustifolius
XP_019419316.1+OIV95919.1	0.00012	0.43	2.35	5	PREDICTED: beta-D-xylosidase 1-like OS=Lupinus angustifolius;hypothetical protein TanjilG_27023 OS=Lupinus angustifolius
XP_019463126.1	0.00017	0.55	1.82	7	PREDICTED: uncharacterized protein LOC109362007 OS=Lupinus angustifolius
XP_019425619.1+XP_019463308.1+XP_019463307.1	0.00017	1.92	1.92	9	PREDICTED: cellulose synthase A catalytic subunit 4 [UDP-forming] OS=Lupinus angustifolius;PREDICTED: cellulose synthase A catalytic subunit 2 [UDP-forming]-like isoform X2 OS=Lupinus angustifolius;PREDICTED: cellulose synthase A catalytic subunit 2 [UDP-forming]-like isoform X1 OS=Lupinus angustifolius
XP_019423846.1	0.00017	1.77	1.77	8	PREDICTED: soyasapogenol B glucuronide galactosyltransferase-like OS=Lupinus angustifolius
OIW00254.1+XP_019462621.1+XP_019462620.1	0.00021	0.63	1.58	9	hypothetical protein TanjilG_27505 OS=Lupinus angustifolius;PREDICTED: 11-beta-hydroxysteroid dehydrogenase 1B-like isoform X2 OS=Lupinus angustifolius;PREDICTED: 11-beta-hydroxysteroid dehydrogenase 1B-like isoform X1 OS=Lupinus angustifolius
XP_019438809.1	0.00021	0.62	1.61	12	PREDICTED: L-arabinokinase-like OS=Lupinus angustifolius
XP_019419193.1+XP_019419194.1+XP_019419195.1	0.00021	0.25	3.93	4	PREDICTED: 14-3-3-like protein C isoform X1 OS=Lupinus angustifolius;PREDICTED: 14-3-3-like protein C isoform X2 OS=Lupinus angustifolius;PREDICTED: 14-3-3-like protein C isoform X3 OS=Lupinus angustifolius
XP_019460998.1+XP_019444408.1+XP_019435093.1+XP_019423904.1+XP_019429586.1	0.00026	0.82	1.21	26	PREDICTED: 26S proteasome regulatory subunit 4 homolog A-like OS=Lupinus angustifolius;PREDICTED: 26S proteasome regulatory subunit 4 homolog A-like OS=Lupinus angustifolius;PREDICTED: 26S proteasome regulatory subunit 4 homolog A OS=Lupinus angustifolius;PREDICTED: 26S proteasome regulatory subunit 4 homolog B-like OS=Lupinus angustifolius;PREDICTED: 26S proteasome regulatory subunit 4 homolog A…
XP_019449926.1	0.00026	1.42	1.42	9	PREDICTED: probable methylenetetrahydrofolate reductase OS=Lupinus angustifolius
XP_019456925.1	0.00026	0.6	1.67	7	PREDICTED: uncharacterized protein LOC109357422 OS=Lupinus angustifolius
OIW16101.1+XP_019432343.1+XP_019420090.1	0.0003	1.42	1.42	13	hypothetical protein TanjilG_18816 OS=Lupinus angustifolius;PREDICTED: trans-cinnamate 4-monooxygenase OS=Lupinus angustifolius;PREDICTED: trans-cinnamate 4-monooxygenase-like OS=Lupinus angustifolius
XP_019463244.1	0.0003	0.39	2.56	5	PREDICTED: 1-Cys peroxiredoxin OS=Lupinus angustifolius
XP_019456619.1	0.0003	0.71	1.41	13	PREDICTED: protein DJ-1 homolog B-like OS=Lupinus angustifolius
XP_019455497.1+XP_019455526.1	0.00034	1.15	1.15	31	PREDICTED: brefeldin A-inhibited guanine nucleotide-exchange protein 5-like isoform X1 OS=Lupinus angustifolius;PREDICTED: brefeldin A-inhibited guanine nucleotide-exchange protein 5-like isoform X4 OS=Lupinus angustifolius
XP_019419096.1+XP_019442456.1	0.00034	1.6	1.6	8	PREDICTED: endoglucanase 25-like OS=Lupinus angustifolius;PREDICTED: endoglucanase 25-like OS=Lupinus angustifolius
XP_019414807.1+XP_019417328.1	0.00037	2.09	2.09	5	PREDICTED: S-adenosylmethionine synthase OS=Lupinus angustifolius;PREDICTED: S-adenosylmethionine synthase 2 OS=Lupinus angustifolius
XP_019459846.1	0.00037	0.21	4.8	3	PREDICTED: em-like protein GEA6 OS=Lupinus angustifolius
XP_019423098.1	0.00041	0.65	1.54	9	PREDICTED: glucose and ribitol dehydrogenase homolog 1-like OS=Lupinus angustifolius
XP_019445501.1	0.00041	1.42	1.42	12	PREDICTED: adenosylhomocysteinase-like OS=Lupinus angustifolius
XP_019417543.1	0.00043	2.22	2.22	5	PREDICTED: cytokinin dehydrogenase 3-like OS=Lupinus angustifolius
XP_019449179.1	0.00043	0.53	1.9	6	PREDICTED: homogentisate 1,2-dioxygenase OS=Lupinus angustifolius
XP_019463065.1	0.00043	0.8	1.25	19	PREDICTED: malate synthase, glyoxysomal OS=Lupinus angustifolius
XP_019436509.1	0.00043	0.83	1.21	31	PREDICTED: seed linoleate 9S-lipoxygenase-3 OS=Lupinus angustifolius
XP_019452520.1+XP_019452519.1+XP_019452518.1	0.00043	2.13	2.13	5	PREDICTED: extensin-2-like isoform X3 OS=Lupinus angustifolius;PREDICTED: extensin-2-like isoform X2 OS=Lupinus angustifolius;PREDICTED: extensin-2-like isoform X1 OS=Lupinus angustifolius
XP_019443521.1	0.00046	1.74	1.74	7	PREDICTED: seed linoleate 9S-lipoxygenase-3-like OS=Lupinus angustifolius
OIW13413.1+XP_019440717.1	0.00046	1.26	1.26	21	hypothetical protein TanjilG_19765 OS=Lupinus angustifolius;PREDICTED: protein argonaute 4-like OS=Lupinus angustifolius
XP_019421441.1+XP_019421440.1	0.00046	0.51	1.95	6	PREDICTED: vicilin-like seed storage protein At2g18540 isoform X2 OS=Lupinus angustifolius;PREDICTED: vicilin-like seed storage protein At2g18540 isoform X1 OS=Lupinus angustifolius
XP_019436353.1	0.00049	0.47	2.13	5	PREDICTED: SNF1-related protein kinase regulatory subunit gamma-like PV42a OS=Lupinus angustifolius
XP_019449749.1	0.00049	0.49	2.03	6	PREDICTED: fructose-1,6-bisphosphatase, cytosolic OS=Lupinus angustifolius
XP_019435715.1	0.00049	1.92	1.92	6	PREDICTED: probable galactinol--sucrose galactosyltransferase 1 OS=Lupinus angustifolius
XP_019413858.1	0.00052	1.34	1.34	13	PREDICTED: gamma aminobutyrate transaminase 3, chloroplastic-like OS=Lupinus angustifolius
XP_019446678.1	0.00054	0.7	1.43	10	PREDICTED: FAM10 family protein At4g22670 OS=Lupinus angustifolius
XP_019417921.1	0.00054	0.6	1.68	5	PREDICTED: phosphoenolpyruvate carboxykinase [ATP] 1-like OS=Lupinus angustifolius
CAI83773.2	0.00054	0.52	1.91	14	legumin-like protein OS=Lupinus albus
XP_019421160.1+XP_019444660.1	0.00054	1.35	1.35	9	PREDICTED: tubulin beta-3 chain-like OS=Lupinus angustifolius;PREDICTED: tubulin beta-3 chain-like OS=Lupinus angustifolius
OIW00789.1+XP_019463940.1	0.00061	0.49	2.03	5	hypothetical protein TanjilG_19594 OS=Lupinus angustifolius;PREDICTED: uncharacterized protein LOC109362543 OS=Lupinus angustifolius
XP_019427855.1	0.00064	1.48	1.48	8	PREDICTED: chalcone--flavonone isomerase 2-like OS=Lupinus angustifolius
CAA09467.1+XP_019416997.1	0.00067	0.46	2.17	5	exo galactanase OS=Lupinus angustifolius;PREDICTED: beta-galactosidase-like OS=Lupinus angustifolius
XP_019455538.1	0.00067	0.73	1.38	11	PREDICTED: alanine aminotransferase 2, mitochondrial-like OS=Lupinus angustifolius
XP_019414881.1	0.00072	0.69	1.45	10	PREDICTED: uncharacterized protein LOC109326621 OS=Lupinus angustifolius
OIW13740.1+OIW13739.1+XP_019440165.1	0.00072	1.43	1.43	11	hypothetical protein TanjilG_17919 OS=Lupinus angustifolius;hypothetical protein TanjilG_17918 OS=Lupinus angustifolius;PREDICTED: glucan endo-1,3-beta-glucosidase, basic isoform-like OS=Lupinus angustifolius
XP_019418249.1+XP_019425762.1+OIV91941.1+XP_019425763.1	0.00072	0.63	1.58	8	PREDICTED: E3 ubiquitin-protein ligase MIEL1-like OS=Lupinus angustifolius;PREDICTED: E3 ubiquitin-protein ligase MIEL1-like isoform X1 OS=Lupinus angustifolius;hypothetical protein TanjilG_23202 OS=Lupinus angustifolius;PREDICTED: E3 ubiquitin-protein ligase MIEL1-like isoform X2 OS=Lupinus angustifolius
XP_019423744.1+XP_019423743.1	0.00072	0.78	1.28	14	PREDICTED: uncharacterized protein LOC109332991 isoform X2 OS=Lupinus angustifolius;PREDICTED: uncharacterized protein LOC109332991 isoform X1 OS=Lupinus angustifolius
OIW18478.1+XP_019451077.1	0.00074	0.65	1.53	8	hypothetical protein TanjilG_13230 OS=Lupinus angustifolius;PREDICTED: lipoamide acyltransferase component of branched-chain alpha-keto acid dehydrogenase complex, mitochondrial OS=Lupinus angustifolius
XP_019461524.1+XP_019455614.1+XP_019440478.1+XP_019423671.1+ABD61729.1+XP_019418711.1	0.00084	0.87	1.15	32	PREDICTED: 26S protease regulatory subunit 7 OS=Lupinus angustifolius;PREDICTED: 26S protease regulatory subunit 7-like OS=Lupinus angustifolius;PREDICTED: 26S protease regulatory subunit 7-like OS=Lupinus angustifolius;PREDICTED: 26S protease regulatory subunit 7-like OS=Lupinus angustifolius;26S proteasome ATPase subunit, partial OS=Lupinus albus;PREDICTED: 26S protease regulatory subunit 7-lik…
XP_019448771.1	0.00087	0.66	1.51	9	PREDICTED: lactoylglutathione lyase OS=Lupinus angustifolius
XP_019428651.1	0.00089	0.5	2	5	PREDICTED: methionine gamma-lyase-like OS=Lupinus angustifolius
XP_019461809.1+OIW17349.1+XP_019420567.1+XP_019432379.1	0.00089	1.22	1.22	27	PREDICTED: pyrophosphate--fructose 6-phosphate 1-phosphotransferase subunit alpha-like OS=Lupinus angustifolius;hypothetical protein TanjilG_22461 OS=Lupinus angustifolius;PREDICTED: pyrophosphate--fructose 6-phosphate 1-phosphotransferase subunit alpha-like isoform X1 OS=Lupinus angustifolius;PREDICTED: pyrophosphate--fructose 6-phosphate 1-phosphotransferase subunit alpha OS=Lupinus angustifoli…
XP_019447919.1	0.00091	1.56	1.56	8	PREDICTED: phototropin-1 OS=Lupinus angustifolius
XP_019419169.1	0.00091	1.75	1.75	6	PREDICTED: stem-specific protein TSJT1 OS=Lupinus angustifolius
OIV90850.1+XP_019427810.1	0.00097	0.66	1.51	7	hypothetical protein TanjilG_15583 OS=Lupinus angustifolius;PREDICTED: glucose and ribitol dehydrogenase homolog 1-like isoform X1 OS=Lupinus angustifolius
XP_019451240.1	0.00106	0.27	3.71	3	PREDICTED: uncharacterized protein C24B11.05 OS=Lupinus angustifolius
XP_019412859.1+XP_019420557.1+OIW17348.1	0.00115	1.83	1.83	5	PREDICTED: long chain acyl-CoA synthetase 2-like OS=Lupinus angustifolius;PREDICTED: long chain acyl-CoA synthetase 2-like OS=Lupinus angustifolius;hypothetical protein TanjilG_22460 OS=Lupinus angustifolius
XP_019461750.1	0.00124	0.64	1.56	9	PREDICTED: uncharacterized protein LOC109360960 OS=Lupinus angustifolius
XP_019415275.1+XP_019437804.1	0.00125	1.51	1.51	8	PREDICTED: transmembrane 9 superfamily member 8-like OS=Lupinus angustifolius;PREDICTED: transmembrane 9 superfamily member 8-like OS=Lupinus angustifolius
XP_019436794.1+XP_019457881.1	0.00125	1.25	1.25	15	PREDICTED: succinate--CoA ligase [ADP-forming] subunit alpha, mitochondrial OS=Lupinus angustifolius;PREDICTED: succinate--CoA ligase [ADP-forming] subunit alpha, mitochondrial-like OS=Lupinus angustifolius
XP_019427856.1	0.00126	1.42	1.42	11	PREDICTED: ABC transporter B family member 19 OS=Lupinus angustifolius
XP_019433134.1	0.00126	1.47	1.47	15	PREDICTED: formate dehydrogenase 1, mitochondrial OS=Lupinus angustifolius
XP_019423588.1	0.00131	1.44	1.44	9	PREDICTED: pectinesterase-like OS=Lupinus angustifolius
XP_019418295.1	0.00135	0.27	3.76	3	PREDICTED: probable glutathione S-transferase parA OS=Lupinus angustifolius
XP_019444968.1+XP_019444970.1	0.00135	0.74	1.34	12	PREDICTED: malate dehydrogenase, glyoxysomal isoform X1 OS=Lupinus angustifolius;PREDICTED: malate dehydrogenase, glyoxysomal isoform X2 OS=Lupinus angustifolius
XP_019458018.1	0.00145	1.7	1.7	6	PREDICTED: 5-methyltetrahydropteroyltriglutamate--homocysteine methyltransferase OS=Lupinus angustifolius
WP_071414491.1+XP_019419536.1+XP_019419533.1	0.00145	1.31	1.31	17	GTP-binding protein OS=Acinetobacter baumannii;PREDICTED: ADP-ribosylation factor isoform X2 OS=Lupinus angustifolius;PREDICTED: ADP-ribosylation factor isoform X1 OS=Lupinus angustifolius
XP_019430954.1	0.00156	0.69	1.45	12	PREDICTED: hydroxyacylglutathione hydrolase cytoplasmic OS=Lupinus angustifolius
OIW09005.1+XP_019448204.1	0.00158	0.24	4.09	3	hypothetical protein TanjilG_05981 OS=Lupinus angustifolius;PREDICTED: beta-galactosidase 1-like isoform X1 OS=Lupinus angustifolius
OIV93303.1+XP_019423412.1	0.00163	0.78	1.27	14	hypothetical protein TanjilG_13130 OS=Lupinus angustifolius;PREDICTED: methylcrotonoyl-CoA carboxylase beta chain, mitochondrial isoform X1 OS=Lupinus angustifolius
XP_019450953.1	0.00164	1.4	1.4	12	PREDICTED: delta(24)-sterol reductase-like OS=Lupinus angustifolius
XP_019419537.1	0.00169	1.23	1.23	16	PREDICTED: glyoxysomal fatty acid beta-oxidation multifunctional protein MFP-a-like OS=Lupinus angustifolius
XP_019464789.1+AJT39808.1	0.00172	0.47	2.11	5	PREDICTED: acetate/butyrate--CoA ligase AAE7, peroxisomal-like OS=Lupinus angustifolius;hypothetical protein OS=Lupinus angustifolius
XP_019443778.1	0.00172	0.56	1.77	6	PREDICTED: probable glutathione S-transferase OS=Lupinus angustifolius
XP_019447164.1	0.00174	0.81	1.23	16	PREDICTED: arginase 1, mitochondrial OS=Lupinus angustifolius
XP_019441123.1	0.00195	1.55	1.55	7	PREDICTED: cellulose synthase A catalytic subunit 3 [UDP-forming]-like OS=Lupinus angustifolius
XP_019440288.1	0.00197	0.7	1.44	9	PREDICTED: quinone oxidoreductase PIG3-like OS=Lupinus angustifolius
XP_019415585.1	0.00206	0.69	1.46	7	PREDICTED: oil body-associated protein 1B-like OS=Lupinus angustifolius
XP_019436676.1	0.0023	0.34	2.91	3	PREDICTED: glycine-rich cell wall structural protein 1.8-like OS=Lupinus angustifolius
XP_019447045.1	0.00234	1.31	1.31	16	PREDICTED: heat shock cognate protein 80 OS=Lupinus angustifolius
XP_019412784.1+XP_019412785.1+XP_019450401.1	0.00243	0.7	1.42	7	PREDICTED: alpha-galactosidase 1-like isoform X1 OS=Lupinus angustifolius;PREDICTED: alpha-galactosidase 1-like isoform X2 OS=Lupinus angustifolius;PREDICTED: alpha-galactosidase 1-like OS=Lupinus angustifolius
XP_019435775.1	0.00267	0.68	1.47	9	PREDICTED: coproporphyrinogen-III oxidase 1, chloroplastic-like isoform X1 OS=Lupinus angustifolius
XP_019437248.1	0.00267	1.22	1.22	18	PREDICTED: coatomer subunit alpha-2-like OS=Lupinus angustifolius
XP_019437258.1	0.00286	0.73	1.38	12	PREDICTED: alpha-galactosidase 3 OS=Lupinus angustifolius
OIW14797.1+XP_019438086.1	0.00295	0.67	1.5	8	hypothetical protein TanjilG_05418 OS=Lupinus angustifolius;PREDICTED: enoyl-CoA hydratase 2, peroxisomal OS=Lupinus angustifolius
XP_019465180.1	0.00296	0.74	1.34	9	PREDICTED: binding partner of ACD11 1-like OS=Lupinus angustifolius
XP_019440900.1	0.00333	0.68	1.46	7	PREDICTED: DNA-damage-repair/toleration protein DRT100-like OS=Lupinus angustifolius
XP_019421234.1+OIV94953.1	0.00341	1.23	1.23	21	PREDICTED: isoleucine--tRNA ligase, cytoplasmic OS=Lupinus angustifolius;hypothetical protein TanjilG_22150 OS=Lupinus angustifolius
XP_019422820.1+ABU98948.1+XP_019461716.1	0.00352	1.3	1.3	12	PREDICTED: guanosine nucleotide diphosphate dissociation inhibitor At5g09550 OS=Lupinus angustifolius;GDP-dissociation inhibitor OS=Lupinus albus;PREDICTED: guanosine nucleotide diphosphate dissociation inhibitor 2 OS=Lupinus angustifolius
XP_019459571.1+XP_019454731.1+OIW05142.1+XP_019425510.1+OIV92368.1+XP_019443081.1	0.00393	1.45	1.45	7	PREDICTED: S-adenosylmethionine synthase 3 OS=Lupinus angustifolius;PREDICTED: S-adenosylmethionine synthase 3-like OS=Lupinus angustifolius;hypothetical protein TanjilG_02615 OS=Lupinus angustifolius;PREDICTED: S-adenosylmethionine synthase 2-like OS=Lupinus angustifolius;hypothetical protein TanjilG_09966 OS=Lupinus angustifolius;PREDICTED: S-adenosylmethionine synthase 3-like OS=Lupinus angust…
XP_019438078.1	0.00401	1.66	1.66	6	PREDICTED: 24-methylenesterol C-methyltransferase 2 OS=Lupinus angustifolius
XP_019422066.1+XP_019429509.1	0.00411	1.53	1.53	5	PREDICTED: peroxidase 73-like OS=Lupinus angustifolius;PREDICTED: peroxidase 51-like OS=Lupinus angustifolius
XP_019457029.1	0.00419	1.47	1.47	6	PREDICTED: uridine nucleosidase 1-like OS=Lupinus angustifolius
XP_019430963.1	0.00448	1.45	1.45	8	PREDICTED: phospho-2-dehydro-3-deoxyheptonate aldolase 1, chloroplastic-like OS=Lupinus angustifolius
XP_019421684.1+XP_019443080.1	0.00451	1.78	1.78	5	PREDICTED: phenylalanine ammonia-lyase class 2 OS=Lupinus angustifolius;PREDICTED: phenylalanine ammonia-lyase class 1-like OS=Lupinus angustifolius
XP_019464294.1	0.00473	1.33	1.33	15	PREDICTED: probable mannitol dehydrogenase 1 OS=Lupinus angustifolius
XP_019464149.1+XP_019449131.1+XP_019449149.1+OIW18865.1+XP_019463865.1	0.00482	1.23	1.23	17	PREDICTED: 1-deoxy-D-xylulose 5-phosphate reductoisomerase, chloroplastic-like OS=Lupinus angustifolius;PREDICTED: 1-deoxy-D-xylulose 5-phosphate reductoisomerase, chloroplastic-like isoform X1 OS=Lupinus angustifolius;PREDICTED: 1-deoxy-D-xylulose 5-phosphate reductoisomerase, chloroplastic-like isoform X2 OS=Lupinus angustifolius;hypothetical protein TanjilG_25308 OS=Lupinus angustifolius;PREDI…
XP_019430619.1+XP_019430618.1	0.00504	1.62	1.62	5	PREDICTED: BAHD acyltransferase DCR isoform X2 OS=Lupinus angustifolius;PREDICTED: BAHD acyltransferase DCR isoform X1 OS=Lupinus angustifolius
XP_019431148.1	0.0051	1.3	1.3	13	PREDICTED: bifunctional L-3-cyanoalanine synthase/cysteine synthase 1, mitochondrial OS=Lupinus angustifolius
XP_019452233.1	0.00531	0.44	2.3	3	PREDICTED: late embryogenesis abundant protein D-34-like OS=Lupinus angustifolius
XP_019437089.1+XP_019458292.1	0.00536	1.38	1.38	7	PREDICTED: tubulin beta-1 chain-like OS=Lupinus angustifolius;PREDICTED: tubulin beta-6 chain OS=Lupinus angustifolius
XP_019423183.1	0.00536	0.54	1.84	4	PREDICTED: putative 4-hydroxy-4-methyl-2-oxoglutarate aldolase 3 OS=Lupinus angustifolius
XP_019461795.1	0.00538	1.25	1.25	19	PREDICTED: UDP-glucose:glycoprotein glucosyltransferase-like isoform X1 OS=Lupinus angustifolius
OIW03555.1+XP_019458338.1	0.00538	0.72	1.4	7	hypothetical protein TanjilG_30975 OS=Lupinus angustifolius;PREDICTED: alpha-galactosidase-like isoform X1 OS=Lupinus angustifolius
XP_019425839.1	0.00539	1.73	1.73	5	PREDICTED: major allergen Pru ar 1-like OS=Lupinus angustifolius
XP_019441710.1	0.00541	0.79	1.26	16	PREDICTED: heat shock 70 kDa protein OS=Lupinus angustifolius
XP_019421805.1+XP_019424472.1	0.00574	1.25	1.25	14	PREDICTED: dynamin-related protein 1C-like OS=Lupinus angustifolius;PREDICTED: dynamin-related protein 1C OS=Lupinus angustifolius
XP_019447037.1+XP_019447039.1	0.00589	0.77	1.3	11	PREDICTED: uridine kinase-like protein 3 isoform X1 OS=Lupinus angustifolius;PREDICTED: uridine kinase-like protein 3 isoform X2 OS=Lupinus angustifolius
XP_019423661.1	0.00591	0.67	1.49	6	PREDICTED: probable alpha,alpha-trehalose-phosphate synthase [UDP-forming] 9 OS=Lupinus angustifolius
XP_019460818.1	0.0066	1.27	1.27	12	PREDICTED: adenosine kinase 2 OS=Lupinus angustifolius
XP_019427743.1	0.00665	0.76	1.31	9	PREDICTED: histidine biosynthesis bifunctional protein hisIE, chloroplastic OS=Lupinus angustifolius
XP_019437266.1+OIW15300.1	0.00711	1.64	1.64	5	PREDICTED: probable chalcone--flavonone isomerase 3 OS=Lupinus angustifolius;hypothetical protein TanjilG_10740 OS=Lupinus angustifolius
XP_019420237.1	0.0077	0.56	1.78	4	PREDICTED: probable phospholipid hydroperoxide glutathione peroxidase OS=Lupinus angustifolius
OIW19112.1+XP_019446158.1	0.00783	0.73	1.37	12	hypothetical protein TanjilG_08912 OS=Lupinus angustifolius;PREDICTED: peroxisomal (S)-2-hydroxy-acid oxidase GLO1-like OS=Lupinus angustifolius
XP_019419657.1+XP_019426104.1+XP_019460980.1	0.00801	0.85	1.17	21	PREDICTED: 26S protease regulatory subunit 6B homolog OS=Lupinus angustifolius;PREDICTED: 26S protease regulatory subunit 6B homolog OS=Lupinus angustifolius;PREDICTED: 26S protease regulatory subunit 6B homolog OS=Lupinus angustifolius
XP_019454054.1	0.00809	0.65	1.55	6	PREDICTED: osmotin-like protein OS=Lupinus angustifolius
XP_019452929.1	0.00809	1.97	1.97	4	PREDICTED: UDP-glucose flavonoid 3-O-glucosyltransferase 7-like OS=Lupinus angustifolius
XP_019462563.1	0.00814	0.74	1.36	9	PREDICTED: alanine--glyoxylate aminotransferase 2 homolog 3, mitochondrial-like OS=Lupinus angustifolius
OIV91805.1+XP_019424830.1	0.00822	0.27	3.77	2	hypothetical protein TanjilG_14384 OS=Lupinus angustifolius;PREDICTED: berberine bridge enzyme-like 8 OS=Lupinus angustifolius
XP_019443004.1+XP_019444263.1	0.00822	0.82	1.23	14	PREDICTED: 2-Cys peroxiredoxin BAS1, chloroplastic OS=Lupinus angustifolius;PREDICTED: 2-Cys peroxiredoxin BAS1, chloroplastic-like OS=Lupinus angustifolius
XP_019449047.1	0.00847	0.8	1.24	16	PREDICTED: acyl-coenzyme A oxidase 3, peroxisomal OS=Lupinus angustifolius
XP_019421310.1+XP_019423377.1+XP_019423382.1+XP_019423381.1	0.00855	1.28	1.28	16	PREDICTED: probable methyltransferase PMT21 OS=Lupinus angustifolius;PREDICTED: probable methyltransferase PMT20 isoform X1 OS=Lupinus angustifolius;PREDICTED: probable methyltransferase PMT20 isoform X3 OS=Lupinus angustifolius;PREDICTED: probable methyltransferase PMT20 isoform X2 OS=Lupinus angustifolius
XP_019455534.1	0.00857	1.67	1.67	4	PREDICTED: D-3-phosphoglycerate dehydrogenase 2, chloroplastic-like OS=Lupinus angustifolius
XP_019421280.1	0.00857	1.71	1.71	4	PREDICTED: 5-methyltetrahydropteroyltriglutamate--homocysteine methyltransferase-like OS=Lupinus angustifolius
XP_019461335.1	0.00877	1.37	1.37	7	PREDICTED: uncharacterized protein LOC109360722 OS=Lupinus angustifolius
XP_019447979.1	0.00877	0.23	4.3	2	PREDICTED: probable inositol oxygenase OS=Lupinus angustifolius
OIW01134.1+XP_019461632.1	0.00896	0.76	1.32	13	hypothetical protein TanjilG_25242 OS=Lupinus angustifolius;PREDICTED: urease OS=Lupinus angustifolius
XP_019413130.1+CAJ84247.1+AAU07997.1+BAJ10723.1	0.00896	1.23	1.23	14	PREDICTED: phosphoenolpyruvate carboxylase, housekeeping isozyme OS=Lupinus angustifolius;phosphoenolpyruvate carboxylase OS=Lupinus luteus;phosphoenolpyruvate carboxylase 2 OS=Lupinus albus;phosphoenolpyruvate carboxylase, partial OS=Lupinus albus
XP_019414104.1+XP_019421902.1+XP_019434090.1+XP_019444591.1+XP_019422405.1+OIV94970.1+XP_019423665.1+(1 more)	0.00897	1.46	1.46	8	PREDICTED: cellulose synthase-like protein D2 OS=Lupinus angustifolius;PREDICTED: cellulose synthase-like protein D5 OS=Lupinus angustifolius;PREDICTED: cellulose synthase-like protein D5 OS=Lupinus angustifolius;PREDICTED: cellulose synthase-like protein D3 OS=Lupinus angustifolius;PREDICTED: cellulose synthase-like protein D3 OS=Lupinus angustifolius;hypothetical protein TanjilG_22167 OS=Lupinu…
XP_019464015.1	0.00898	0.65	1.54	5	PREDICTED: probable alpha,alpha-trehalose-phosphate synthase [UDP-forming] 11 OS=Lupinus angustifolius
XP_019415451.1	0.00898	1.31	1.31	8	PREDICTED: cytochrome P450 98A2 OS=Lupinus angustifolius
XP_019437950.1+XP_019464023.1	0.00899	1.25	1.25	23	PREDICTED: ATPase 11, plasma membrane-type OS=Lupinus angustifolius;PREDICTED: ATPase 11, plasma membrane-type-like OS=Lupinus angustifolius
XP_019444911.1	0.00926	1.49	1.49	8	PREDICTED: peroxidase 51-like OS=Lupinus angustifolius
XP_019454296.1	0.00931	0.64	1.55	5	PREDICTED: uncharacterized protein LOC109355543 OS=Lupinus angustifolius
XP_019418970.1	0.00967	2.18	2.18	3	PREDICTED: MLP-like protein 34 OS=Lupinus angustifolius
XP_019431250.1	0.00967	0.5	2.01	4	PREDICTED: uncharacterized protein LOC109338458 OS=Lupinus angustifolius
XP_019431179.1+XP_019463270.1	0.00978	0.81	1.23	15	PREDICTED: galactokinase-like OS=Lupinus angustifolius;PREDICTED: galactokinase-like isoform X1 OS=Lupinus angustifolius
XP_019436730.1	0.00989	1.58	1.58	5	PREDICTED: glutamine synthetase nodule isozyme OS=Lupinus angustifolius
XP_019447066.1	0.01018	1.31	1.31	8	PREDICTED: fasciclin-like arabinogalactan protein 1 OS=Lupinus angustifolius
XP_019452577.1	0.01018	1.4	1.4	9	PREDICTED: pyruvate kinase isozyme A, chloroplastic-like isoform X1 OS=Lupinus angustifolius
XP_019458143.1	0.01044	1.2	1.2	22	PREDICTED: protein TPLATE OS=Lupinus angustifolius
XP_019456768.1	0.01055	1.83	1.83	4	PREDICTED: GDSL esterase/lipase At2g04570-like OS=Lupinus angustifolius
XP_019412701.1	0.01072	0.62	1.62	5	PREDICTED: peptidyl-prolyl cis-trans isomerase-like OS=Lupinus angustifolius
XP_019452131.1	0.01098	1.39	1.39	7	PREDICTED: 6-phosphogluconate dehydrogenase, decarboxylating 3-like OS=Lupinus angustifolius
XP_019458699.1	0.01108	1.44	1.44	6	PREDICTED: xyloglucan endotransglucosylase/hydrolase 1 OS=Lupinus angustifolius
XP_019419166.1+XP_019419165.1	0.0111	0.78	1.28	9	PREDICTED: ATP-dependent (S)-NAD(P)H-hydrate dehydratase isoform X2 OS=Lupinus angustifolius;PREDICTED: ATP-dependent (S)-NAD(P)H-hydrate dehydratase isoform X1 OS=Lupinus angustifolius
XP_019443494.1+OIW11847.1	0.01112	0.44	2.29	3	PREDICTED: beta-galactosidase 1-like OS=Lupinus angustifolius;hypothetical protein TanjilG_31597 OS=Lupinus angustifolius
XP_019447473.1+XP_019457369.1	0.01114	0.47	2.11	3	PREDICTED: methionine gamma-lyase-like OS=Lupinus angustifolius;PREDICTED: methionine gamma-lyase-like OS=Lupinus angustifolius
OIW18882.1+XP_019448920.1+XP_019465237.1	0.01117	1.37	1.37	13	hypothetical protein TanjilG_25325 OS=Lupinus angustifolius;PREDICTED: 60S ribosomal protein L13a OS=Lupinus angustifolius;PREDICTED: 60S ribosomal protein L13a-like OS=Lupinus angustifolius
XP_019446808.1	0.01119	0.67	1.5	8	PREDICTED: cysteine proteinase COT44-like OS=Lupinus angustifolius
XP_019462256.1+XP_019462251.1+XP_019462243.1+XP_019462242.1+XP_019462247.1+XP_019462246.1+XP_019462257.1+(13 more)	0.01128	1.31	1.31	10	PREDICTED: myosin-7-like isoform X14 OS=Lupinus angustifolius;PREDICTED: myosin-7-like isoform X10 OS=Lupinus angustifolius;PREDICTED: myosin-6-like isoform X2 OS=Lupinus angustifolius;PREDICTED: myosin-6-like isoform X1 OS=Lupinus angustifolius;PREDICTED: myosin-6-like isoform X6 OS=Lupinus angustifolius;PREDICTED: myosin-6-like isoform X5 OS=Lupinus angustifolius;PREDICTED: myosin-6-like isofor…
XP_019436872.1	0.01167	0.48	2.07	3	PREDICTED: thioredoxin H-type-like OS=Lupinus angustifolius
XP_019416739.1	0.01198	1.27	1.27	11	PREDICTED: acetyl-CoA carboxylase 1-like OS=Lupinus angustifolius
XP_019447003.1	0.01207	0.53	1.88	4	PREDICTED: asparagine synthetase [glutamine-hydrolyzing] 2-like OS=Lupinus angustifolius
XP_019430430.1	0.01211	0.68	1.48	6	PREDICTED: alcohol dehydrogenase 1-like OS=Lupinus angustifolius
XP_019428741.1	0.01211	0.49	2.05	3	PREDICTED: proline dehydrogenase 2, mitochondrial-like OS=Lupinus angustifolius
XP_019425872.1	0.01212	0.56	1.8	4	PREDICTED: 7-deoxyloganetin glucosyltransferase-like OS=Lupinus angustifolius
OIW15054.1	0.01235	0.78	1.29	10	hypothetical protein TanjilG_13981 OS=Lupinus angustifolius
Q9AXK2.1+Q9LLQ2.1	0.01258	0.49	2.06	3	Class 10 plant pathogenesis-related protein 2C;Class 10 plant pathogenesis-related protein 2B
XP_019447893.1	0.01264	0.77	1.3	11	PREDICTED: aspartate carbamoyltransferase 3, chloroplastic-like OS=Lupinus angustifolius
XP_019420782.1	0.01264	0.8	1.25	12	PREDICTED: heat shock 70 kDa protein 8 OS=Lupinus angustifolius
XP_019412989.1	0.01265	1.42	1.42	8	PREDICTED: subtilisin-like protease SBT1.6 OS=Lupinus angustifolius
XP_019433457.1	0.01267	1.35	1.35	9	PREDICTED: ABC transporter C family member 14-like isoform X1 OS=Lupinus angustifolius
XP_019429309.1+OIW16940.1	0.01268	1.39	1.39	10	PREDICTED: ABC transporter G family member 36-like OS=Lupinus angustifolius;hypothetical protein TanjilG_00138 OS=Lupinus angustifolius
OIW04485.1	0.01322	0.63	1.58	5	hypothetical protein TanjilG_24182 OS=Lupinus angustifolius
XP_019432361.1	0.01323	0.38	2.64	2	PREDICTED: uncharacterized protein LOC109339386 OS=Lupinus angustifolius
XP_019454174.1+XP_019454173.1	0.01353	1.4	1.4	5	PREDICTED: glycine-rich RNA-binding protein GRP1A-like isoform X2 OS=Lupinus angustifolius;PREDICTED: glycine-rich RNA-binding protein GRP1A-like isoform X1 OS=Lupinus angustifolius
XP_019420368.1	0.01353	0.47	2.13	3	PREDICTED: phosphoenolpyruvate carboxykinase [ATP]-like OS=Lupinus angustifolius
XP_019434157.1+XP_019434156.1	0.01366	0.67	1.5	6	PREDICTED: probable galactinol--sucrose galactosyltransferase 2 isoform X2 OS=Lupinus angustifolius;PREDICTED: probable galactinol--sucrose galactosyltransferase 2 isoform X1 OS=Lupinus angustifolius
XP_019463437.1	0.01375	1.2	1.2	20	PREDICTED: transketolase, chloroplastic OS=Lupinus angustifolius
XP_019442531.1	0.01376	0.33	3.04	2	PREDICTED: P24 oleosin-like OS=Lupinus angustifolius
XP_019413609.1	0.01396	1.31	1.31	8	PREDICTED: elongation factor G-2, mitochondrial OS=Lupinus angustifolius
OIV96283.1+XP_019416817.1	0.01397	0.7	1.43	7	hypothetical protein TanjilG_05123 OS=Lupinus angustifolius;PREDICTED: endochitinase A2 OS=Lupinus angustifolius
XP_019419796.1+OIV95980.1+XP_019434299.1	0.0142	1.66	1.66	5	PREDICTED: berberine bridge enzyme-like 13 OS=Lupinus angustifolius;hypothetical protein TanjilG_27084 OS=Lupinus angustifolius;PREDICTED: berberine bridge enzyme-like 13 OS=Lupinus angustifolius
XP_019436150.1+XP_019436148.1	0.01424	0.7	1.42	6	PREDICTED: glutathione S-transferase zeta class-like isoform X2 OS=Lupinus angustifolius;PREDICTED: glutathione S-transferase zeta class-like isoform X1 OS=Lupinus angustifolius
XP_019417317.1	0.01424	1.91	1.91	4	PREDICTED: 1-aminocyclopropane-1-carboxylate oxidase 5-like OS=Lupinus angustifolius
XP_019461072.1	0.01505	1.28	1.28	12	PREDICTED: subtilisin-like protease SBT1.5 OS=Lupinus angustifolius
XP_019441211.1+OIW19505.1	0.01551	0.68	1.47	9	PREDICTED: acidic mammalian chitinase-like OS=Lupinus angustifolius;hypothetical protein TanjilG_06960 OS=Lupinus angustifolius
XP_019448091.1	0.01578	1.32	1.32	7	PREDICTED: phospholipase D alpha 1-like OS=Lupinus angustifolius
XP_019448427.1	0.01578	1.85	1.85	3	PREDICTED: uncharacterized protein LOC109351389 OS=Lupinus angustifolius
XP_019424460.1	0.01636	0.75	1.33	10	PREDICTED: probable calcium-binding protein CML13 OS=Lupinus angustifolius
XP_019424711.1	0.01655	1.43	1.43	6	PREDICTED: probable NAD(P)H dehydrogenase (quinone) FQR1-like 1 OS=Lupinus angustifolius
XP_019429231.1+OIW16577.1	0.01662	1.52	1.52	5	PREDICTED: alpha-L-fucosidase 3-like OS=Lupinus angustifolius;hypothetical protein TanjilG_00062 OS=Lupinus angustifolius
XP_019444471.1+OIW11274.1+XP_019444470.1+XP_019444467.1+XP_019444472.1+XP_019444469.1+XP_019444468.1+(4 more)	0.01719	1.72	1.72	3	PREDICTED: histone H1-like isoform X5 OS=Lupinus angustifolius;hypothetical protein TanjilG_28365 OS=Lupinus angustifolius;PREDICTED: histone H1-like isoform X4 OS=Lupinus angustifolius;PREDICTED: histone H1-like isoform X1 OS=Lupinus angustifolius;PREDICTED: histone H1-like isoform X6 OS=Lupinus angustifolius;PREDICTED: histone H1-like isoform X3 OS=Lupinus angustifolius;PREDICTED: histone H1-li…
XP_019431472.1	0.01725	0.63	1.59	4	PREDICTED: probable carboxylesterase 8 isoform X1 OS=Lupinus angustifolius
OIW19009.1+XP_019447186.1+XP_019464186.1	0.01794	1.27	1.27	12	hypothetical protein TanjilG_20282 OS=Lupinus angustifolius;PREDICTED: 3-phosphoshikimate 1-carboxyvinyltransferase 2 OS=Lupinus angustifolius;PREDICTED: 3-phosphoshikimate 1-carboxyvinyltransferase 2 OS=Lupinus angustifolius
XP_019430876.1	0.01812	0.83	1.2	15	PREDICTED: annexin D1-like OS=Lupinus angustifolius
XP_019437738.1	0.01894	1.17	1.17	9	PREDICTED: glycine dehydrogenase (decarboxylating), mitochondrial-like OS=Lupinus angustifolius
XP_019423358.1+XP_019444618.1	0.01911	1.11	1.11	36	PREDICTED: beta-adaptin-like protein C OS=Lupinus angustifolius;PREDICTED: beta-adaptin-like protein C OS=Lupinus angustifolius
XP_019419273.1	0.01916	1.27	1.27	9	PREDICTED: actin-2-like OS=Lupinus angustifolius
XP_019419668.1+XP_019419671.1	0.01921	0.72	1.38	6	PREDICTED: serine--tRNA ligase-like isoform X1 OS=Lupinus angustifolius;PREDICTED: serine--tRNA ligase-like isoform X2 OS=Lupinus angustifolius
XP_019427766.1+XP_019441334.1	0.01936	0.75	1.33	8	PREDICTED: 60S ribosomal protein L22-3-like OS=Lupinus angustifolius;PREDICTED: 60S ribosomal protein L22-3 OS=Lupinus angustifolius
XP_019436463.1	0.01936	0.78	1.28	11	PREDICTED: clavaminate synthase-like protein At3g21360 OS=Lupinus angustifolius
XP_019422329.1+XP_019422330.1	0.01938	0.68	1.46	5	PREDICTED: lysosomal Pro-X carboxypeptidase isoform X1 OS=Lupinus angustifolius;PREDICTED: lysosomal Pro-X carboxypeptidase isoform X2 OS=Lupinus angustifolius
XP_019429558.1	0.01953	1.38	1.38	7	PREDICTED: 2-methylene-furan-3-one reductase-like OS=Lupinus angustifolius
XP_019418313.1	0.02006	0.37	2.71	2	PREDICTED: stem-specific protein TSJT1-like OS=Lupinus angustifolius
OIV97168.1+XP_019416603.1	0.02084	0.8	1.25	12	hypothetical protein TanjilG_28919 OS=Lupinus angustifolius;PREDICTED: probable galactinol--sucrose galactosyltransferase 2 OS=Lupinus angustifolius
XP_019443618.1	0.02112	1.44	1.44	7	PREDICTED: DNA-damage-repair/toleration protein DRT100-like OS=Lupinus angustifolius
AAT06600.2	0.02196	1.57	1.57	5	dehydrin OS=Lupinus albus
XP_019448798.1	0.02196	0.67	1.49	5	PREDICTED: serine carboxypeptidase-like 51 OS=Lupinus angustifolius
XP_019417262.1	0.022	0.84	1.19	18	PREDICTED: pyruvate kinase 1, cytosolic-like OS=Lupinus angustifolius
XP_019421960.1	0.02201	1.2	1.2	10	PREDICTED: DNA replication licensing factor MCM7 OS=Lupinus angustifolius
XP_019424012.1	0.02251	0.84	1.19	17	PREDICTED: uncharacterized protein LOC109333149 OS=Lupinus angustifolius
XP_019462298.1+XP_019462301.1	0.02294	0.48	2.08	3	PREDICTED: legumin type B-like isoform X1 OS=Lupinus angustifolius;PREDICTED: legumin type B-like isoform X2 OS=Lupinus angustifolius
XP_019442939.1+XP_019442940.1	0.02294	1.38	1.38	7	PREDICTED: 5-methyltetrahydropteroyltriglutamate--homocysteine methyltransferase 1 isoform X1 OS=Lupinus angustifolius;PREDICTED: 5-methyltetrahydropteroyltriglutamate--homocysteine methyltransferase 1 isoform X2 OS=Lupinus angustifolius
XP_019424595.1	0.02356	1.38	1.38	8	PREDICTED: elongation factor Tu, mitochondrial-like OS=Lupinus angustifolius
XP_019449811.1	0.02359	1.29	1.29	9	PREDICTED: coatomer subunit alpha-2-like OS=Lupinus angustifolius
XP_019459433.1	0.02381	1.78	1.78	3	PREDICTED: probable xyloglucan endotransglucosylase/hydrolase protein 32 OS=Lupinus angustifolius
XP_019454945.1+XP_019454944.1	0.02419	0.49	2.02	3	PREDICTED: embryonic protein DC-8-like isoform X2 OS=Lupinus angustifolius;PREDICTED: embryonic protein DC-8-like isoform X1 OS=Lupinus angustifolius
XP_019446517.1+XP_019446516.1	0.02439	1.51	1.51	6	PREDICTED: endoglucanase 6 isoform X2 OS=Lupinus angustifolius;PREDICTED: endoglucanase 6 isoform X1 OS=Lupinus angustifolius
XP_019458428.1+OIW03933.1	0.02439	0.75	1.33	8	PREDICTED: beta-galactosidase 8-like OS=Lupinus angustifolius;hypothetical protein TanjilG_30209 OS=Lupinus angustifolius
XP_019425873.1	0.02439	0.68	1.47	7	PREDICTED: uncharacterized protein LOC109334511 OS=Lupinus angustifolius
[truncated: 3,749 more rows]

## Sheet: (A) White lupin, -S ̸ -S+Asn
Table S1. Full proteomics data (iTRAQ) for embryonic axes isolated from white lupin (A) and Andean lupin (B) germinating seeds and cultured in vitro for 96 h on a medium with (+S) and without (-S) 60 mM sucrose. Culture media were also enriched with 35 mM asparagine (+Asn). Sheets show relations in protein levels between embryonic axes in the following pairs: +S/+S+Asn, +S/-S, and -S/-S+Asn. Stat…
[truncated: 3,193 more rows]

[truncated: 3 more sheets: (B) Andean lupin, +S ̸ +S+Asn, (B) Andean lupin, +S ̸ -S, (B) Andean lupin, -S ̸ -S+Asn]
