# Supplementary material for: Sugar Starvation Disrupts Lipid Breakdown by Inducing Autophagy in Embryonic Axes of Lupin (Lupinus spp.) Germinating Seeds
Source: Int J Mol Sci. 2023 Jul 21;24(14):11773. doi: 10.3390/ijms241411773 (PMC10380618; doi:10.3390/ijms241411773)
Supplement: Supplementary file 1 [file ijms-24-11773-s001.zip › Table S2.xlsx]

## Sheet: White lupin (A)
	Table S2. Transcriptomics data related to amino acid metabolism in white lupin (A) and Andean lupin (B) embryonic axes. The axes were isolated from imbibed seeds and cultured in vitro for 96 h on a medium with (+S) and without (-S) 60 mM sucrose. Culture media were also enriched with 35 mM asparagine (+Asn). Data were obtained from three independent in vitro cultures and three independent sequenc…
	+S																				+S+Asn																				-S
	Sequencing 1						Sequencing 2						Sequencing 3						Means	Normalized means	Sequencing 1						Sequencing 2						Sequencing 3						Means	Normalized means	Sequencing 1						Sequencing 2
Feature ID	group 5 - 180518_SNK268_B_L005_APBZ-1-5_R1 trimmed (GE)-1 - Expression values	group 5 - 180518_SNK268_B_L005_APBZ-1-5_R1 trimmed (GE)-1 - Normalized expression values	group 5 - 180518_SNK268_B_L005_APBZ-1-5_R1 trimmed (GE)-1 - Unique gene reads	group 5 - 180518_SNK268_B_L005_APBZ-1-5_R1 trimmed (GE)-1 - Total gene reads	group 5 - 180518_SNK268_B_L005_APBZ-1-5_R1 trimmed (GE)-1 - RPKM	group 5 - 180518_SNK268_B_L005_APBZ-1-5_R1 trimmed (GE)-1 - Chromosome region end	group 5 - 190517_SNK268_A_L001_APBZ-2-5 (GE) - Expression values	group 5 - 190517_SNK268_A_L001_APBZ-2-5 (GE) - Normalized expression values	group 5 - 190517_SNK268_A_L001_APBZ-2-5 (GE) - Unique gene reads	group 5 - 190517_SNK268_A_L001_APBZ-2-5 (GE) - Total gene reads	group 5 - 190517_SNK268_A_L001_APBZ-2-5 (GE) - RPKM	group 5 - 190517_SNK268_A_L001_APBZ-2-5 (GE) - Chromosome region end	group 5 - 210217_A00902_B_L002_APBZ-3-5 (GE) - Expression values	group 5 - 210217_A00902_B_L002_APBZ-3-5 (GE) - Normalized expression values	group 5 - 210217_A00902_B_L002_APBZ-3-5 (GE) - Unique gene reads	group 5 - 210217_A00902_B_L002_APBZ-3-5 (GE) - Total gene reads	group 5 - 210217_A00902_B_L002_APBZ-3-5 (GE) - RPKM	group 5 - 210217_A00902_B_L002_APBZ-3-5 (GE) - Chromosome region end	group 5 - Means	group 5 - Normalized means	group 6 - 180518_SNK268_B_L005_APBZ-1-6_R1 trimmed (GE)-1 - Expression values	group 6 - 180518_SNK268_B_L005_APBZ-1-6_R1 trimmed (GE)-1 - Normalized expression values	group 6 - 180518_SNK268_B_L005_APBZ-1-6_R1 trimmed (GE)-1 - Unique gene reads	group 6 - 180518_SNK268_B_L005_APBZ-1-6_R1 trimmed (GE)-1 - Total gene reads	group 6 - 180518_SNK268_B_L005_APBZ-1-6_R1 trimmed (GE)-1 - RPKM	group 6 - 180518_SNK268_B_L005_APBZ-1-6_R1 trimmed (GE)-1 - Chromosome region end	group 6 - 190517_SNK268_A_L001_APBZ-2-6 (GE) - Expression values	group 6 - 190517_SNK268_A_L001_APBZ-2-6 (GE) - Normalized expression values	group 6 - 190517_SNK268_A_L001_APBZ-2-6 (GE) - Unique gene reads	group 6 - 190517_SNK268_A_L001_APBZ-2-6 (GE) - Total gene reads	group 6 - 190517_SNK268_A_L001_APBZ-2-6 (GE) - RPKM	group 6 - 190517_SNK268_A_L001_APBZ-2-6 (GE) - Chromosome region end	group 6 - 210217_A00902_B_L002_APBZ-3-6 (GE) - Expression values	group 6 - 210217_A00902_B_L002_APBZ-3-6 (GE) - Normalized expression values	group 6 - 210217_A00902_B_L002_APBZ-3-6 (GE) - Unique gene reads	group 6 - 210217_A00902_B_L002_APBZ-3-6 (GE) - Total gene reads	group 6 - 210217_A00902_B_L002_APBZ-3-6 (GE) - RPKM	group 6 - 210217_A00902_B_L002_APBZ-3-6 (GE) - Chromosome region end	group 6 - Means	group 6 - Normalized means	group 7 - 180518_SNK268_B_L005_APBZ-1-7_R1 trimmed (GE)-1 - Expression values	group 7 - 180518_SNK268_B_L005_APBZ-1-7_R1 trimmed (GE)-1 - Normalized expression values	group 7 - 180518_SNK268_B_L005_APBZ-1-7_R1 trimmed (GE)-1 - Unique gene reads	group 7 - 180518_SNK268_B_L005_APBZ-1-7_R1 trimmed (GE)-1 - Total gene reads	group 7 - 180518_SNK268_B_L005_APBZ-1-7_R1 trimmed (GE)-1 - RPKM	group 7 - 180518_SNK268_B_L005_APBZ-1-7_R1 trimmed (GE)-1 - Chromosome region end	group 7 - 190517_SNK268_A_L001_APBZ-2-7 (GE) - Expression values	group 7 - 190517_SNK268_A_L001_APBZ-2-7 (GE) - Normalized expression values	group 7 - 190517_SNK268_A_L001_APBZ-2-7 (GE) - Unique gene reads
XM_019591619.1	4721	113.614	4721	4721	93.8956	1210	11167	130.247	11167	11167	107.642	1210	16053	117.948	16053	16053	97.4779	1210	10647	120.603	8400	120.966	8400	8400	99.9719	1210	9746	135.889	9746	9746	112.305	1210	17945	138.601	17945	17945	114.547	1210	12030.3	131.819	4623	332.628	4623	4623	274.899	1210	22066	268.016	22066
XM_019557276.1	2364	56.8911	2355	2364	20.6202	2759	7714	89.9728	7695	7714	32.6107	2759	8505	62.4899	8491	8505	22.6495	2759	6194.33	69.7846	5656	81.4504	5619	5656	29.5217	2759	5046	70.3565	5032	5046	25.5007	2759	10374	80.1255	10352	10374	29.0415	2759	7025.33	77.3108	1678	120.733	1671	1678	43.7597	2759	11149	135.417	11139
XM_019562658.1	839	20.191	825	839	10.4943	1924	2643	30.8268	2625	2643	16.0223	1924	2871	21.0945	2850	2871	10.9639	1924	2117.67	24.0374	1819	26.1949	1793	1819	13.6148	1924	1745	24.3306	1730	1745	12.6458	1924	3249	25.0942	3222	3249	13.0427	1924	2271	25.2066	1025	73.7494	1007	1025	38.3313	1924	7845	95.2862	7819
XM_019591458.1	38469	925.779	37930	38469	434.434	2131	75681	882.711	75496	75681	414.224	2131	66240	486.694	66040	66240	228.387	2131	60130	765.061	80196	1154.88	79134	80196	541.942	2131	46774	652.171	46681	46774	306.04	2131	80515	621.872	80328	80515	291.822	2131	69161.7	809.641	43490	3129.13	42983	43490	1468.39	2131	225674	2741.06	225131
XM_019560103.1	1250	30.082	1250	1250	16.1818	1859	2820	32.8913	2820	2820	17.693	1859	4537	33.3353	4537	4537	17.9318	1859	2869	32.1029	2149	30.9471	2149	2149	16.6472	1859	2309	32.1945	2309	2309	17.3182	1859	4017	31.026	4017	4017	16.6896	1859	2825	31.3892	332	23.8876	332	332	12.8497	1859	2124	25.7983	2124
XM_019583239.1	2802	67.4318	2802	2802	40.2578	1675	5643	65.8176	5643	5643	39.2941	1675	10224	75.1201	10224	10224	44.8478	1675	6223	69.4565	4732	68.1442	4732	4732	40.6831	1675	4791	66.8011	4791	4791	39.8812	1675	9569	73.9079	9569	9569	44.1241	1675	6364	69.6177	665	47.8472	665	665	28.5655	1675	4268	51.8396	4268
XM_019598127.1	263	6.32925	261	263	5.23511	1209	548	6.39164	548	548	5.28672	1209	983	7.22252	981	983	5.97396	1209	598	6.6478	445	6.40832	442	445	5.30051	1209	459	6.39985	459	459	5.29351	1209	1066	8.23344	1066	1066	6.81013	1209	656.667	7.01387	156	11.2243	155	156	9.28395	1209	828	10.057	826
XM_019572931.1	411	9.89096	411	411	7.51593	1316	1023	11.9318	1023	1023	9.06675	1316	1272	9.34593	1272	1272	7.10177	1316	902	10.3896	2660	38.3059	2660	2660	29.1078	1316	2367	33.0031	2367	2367	25.0784	1316	3445	26.6081	3445	3445	20.2189	1316	2824	32.639	3131	225.277	3131	3131	171.183	1316	12499	151.814	12494
XM_019589483.1	396	9.52997	391	396	6.10896	1560	967	11.2787	965	967	7.22992	1560	1974	14.5038	1968	1974	9.29732	1560	1112.33	11.7708	735	10.5845	726	735	6.78495	1560	848	11.8237	848	848	7.57929	1560	1855	14.3274	1853	1855	9.18425	1560	1146	12.2452	44	3.16583	44	44	2.02938	1560	423	5.1378	421
XM_019559246.1	6859	165.066	224	6859	22.7238	7264	11479	133.886	522	11479	18.4315	7264	20112	147.771	826	20112	20.343	7264	12816.7	148.908	8281	119.252	250	8281	16.4169	7264	8562	119.38	358	8562	16.4345	7264	10159	78.4649	467	10159	10.8019	7264	9000.67	105.699	510	36.6948	14	510	5.0516	7264	2183	26.5149	103
XM_019561320.1	2240	53.9069	2203	2240	7.59359	7099	5022	58.5745	4984	5022	8.25109	7099	7245	53.2321	7193	7245	7.49854	7099	4835.67	55.2378	4354	62.7007	4299	4354	8.83233	7099	4539	63.2874	4501	4539	8.91498	7099	8080	62.4073	8024	8080	8.791	7099	5657.67	62.7985	753	54.1788	738	753	7.63189	7099	5055	61.3986	5016
XM_019558675.1	292	7.02715	287	292	5.05187	1391	619	7.21976	616	619	5.19033	1391	923	6.78168	913	923	4.8754	1391	611.333	7.00953	533	7.67558	522	533	5.51803	1391	387	5.39595	382	387	3.87919	1391	431	3.32891	427	431	2.39317	1391	450.333	5.46681	73	5.2524	70	73	3.77599	1391	381	4.62767	381
XM_019564520.1	2892	69.5977	2879	2892	52.6856	1321	6502	75.8366	6488	6502	57.4085	1321	8204	60.2783	8172	8204	45.6308	1321	5866	68.5709	2294	33.0352	2268	2294	25.0077	1321	2908	40.5463	2900	2908	30.6937	1321	4121	31.8293	4086	4121	24.0948	1321	3107.67	35.1369	341	24.5352	338	341	18.5732	1321	1525	18.5228	1515
XM_019574925.1	7781	187.254	7535	7781	136.383	1373	14479	168.877	14323	14479	122.999	1373	31562	231.9	31085	31562	168.9	1373	17940.7	196.01	10310	148.471	9930	10310	108.136	1373	15432	215.169	15274	15432	156.714	1373	29660	229.084	29333	29660	166.849	1373	18467.3	197.575	1993	143.398	1936	1993	104.441	1373	12313	149.555	12173
XM_019583455.1	630	15.1613	630	630	13.2529	1144	1053	12.2817	1053	1053	10.7358	1144	1640	12.0498	1640	1640	10.533	1144	1107.67	13.1643	670	9.64848	670	670	8.43398	1144	732	10.2063	732	732	8.92159	1144	1787	13.8022	1787	1787	12.0649	1144	1063	11.219	53	3.81338	53	53	3.33338	1144	443	5.38072	443
XM_019601473.1	1319	31.7425	1	1319	21.5935	1470	2166	25.2633	2	2166	17.1859	1470	3503	25.738	3	3503	17.5089	1470	2329.33	27.5813	1682	24.222	0	1682	16.4775	1470	2039	28.4298	2	2039	19.34	1470	3795	29.3114	2	3795	19.9397	1470	2505.33	27.3211	245	17.6279	0	245	11.9918	1470	1137	13.8101	0
XM_019569101.1	1228	29.5525	1227	1228	18.505	1597	2738	31.9349	2738	2738	19.9968	1597	3808	27.979	3807	3808	17.5197	1597	2591.33	29.8221	2228	32.0848	2228	2228	20.0907	1597	2562	35.722	2562	2562	22.3682	1597	4556	35.1891	4556	4556	22.0345	1597	3115.33	34.332	255	18.3474	255	255	11.4887	1597	1881	22.8468	1881
XM_019577070.1	2772	66.7098	332	2772	41.6416	1602	5445	63.5082	810	5445	39.6431	1602	9820	72.1517	1607	9820	45.0385	1602	6012.33	67.4566	3840	55.2987	429	3840	34.5186	1602	5295	73.8283	753	5295	46.0851	1602	10276	79.3685	1712	10276	49.5434	1602	6470.33	69.4985	352	25.3266	70	352	15.8094	1602	2754	33.4504	374
XM_019597325.1	874	21.0333	804	874	11.757	1789	1760	20.5279	1710	1760	11.4745	1789	2979	21.888	2917	2979	12.2348	1789	1871	21.1497	1426	20.5354	1348	1426	11.4787	1789	1447	20.1756	1397	1447	11.2776	1789	2770	21.3946	2710	2770	11.959	1789	1881	20.7019	278	20.0023	260	278	11.1807	1789	1597	19.3973	1553
XM_019606335.1	7847	188.843	437	7847	118.62	1592	8956	104.459	1147	8956	65.615	1592	14300	105.068	1897	14300	65.9976	1592	10367.7	132.79	11393	164.067	710	11393	103.057	1592	9297	129.628	1129	9297	81.4248	1592	16732	129.233	2175	16732	81.1763	1592	12474	140.976	1451	104.4	99	1451	65.5781	1592	5563	67.5688	690
XM_019569218.1	3078	74.0739	98	3078	28.6221	2588	5851	68.2436	414	5851	26.3692	2588	9233	67.8388	801	9233	26.2128	2588	6054	70.0521	4288	61.7502	131	4288	23.8602	2588	4494	62.66	336	4494	24.2117	2588	8458	65.3269	677	8458	25.2422	2588	5746.67	63.2457	870	62.597	27	870	24.1874	2588	5130	62.3095	338
XM_019581380.1	9576	230.452	773	9576	163.673	1408	18264	213.024	1794	18264	151.295	1408	56471	414.917	5446	56471	294.685	1408	28103.7	286.131	1614	23.2427	140	1614	16.5076	1408	2459	34.2859	266	2459	24.3508	1408	2192	16.9303	217	2192	12.0244	1408	2088.33	24.8197	176	12.6633	18	176	8.99383	1408	363	4.40904	45
XM_019585345.1	227	5.46289	227	227	4.20222	1300	580	6.76488	580	580	5.20375	1300	1011	7.42825	1011	1011	5.71404	1300	606	6.552	432	6.22111	432	432	4.78547	1300	392	5.46567	392	392	4.20436	1300	861	6.65009	861	861	5.11545	1300	561.667	6.11229	69	4.96459	69	69	3.81892	1300	384	4.6641	384
XM_019606087.1	908	21.8516	908	908	8.24587	2650	1771	20.6562	1771	1771	7.79479	2650	2456	18.0453	2456	2456	6.80954	2650	1711.67	20.1843	1619	23.3147	1619	1619	8.79802	2650	1534	21.3886	1534	1534	8.07117	2650	2925	22.5918	2925	2925	8.52519	2650	2026	22.4317	161	11.5841	161	161	4.37134	2650	764	9.27962	764
XM_019603534.1	295	7.09935	19	295	5.79066	1226	654	7.62798	105	654	6.22184	1226	1073	7.88379	172	1073	6.4305	1226	674	7.53704	456	6.56672	34	456	5.35622	1226	516	7.1946	110	516	5.86835	1226	1136	8.7741	230	1136	7.15669	1226	702.667	7.51181	145	10.4328	18	145	8.50966	1226	789	9.58328	147
XM_019579048.1	225	5.41476	225	225	5.11792	1058	493	5.75014	493	493	5.43492	1058	837	6.1498	837	837	5.81266	1058	518.333	5.77157	441	6.35071	441	441	6.00256	1058	450	6.27436	450	450	5.9304	1058	828	6.39521	826	828	6.04462	1058	573	6.34009	74	5.32435	74	74	5.03246	1058	356	4.32401	356
XM_019606987.1	696	16.7497	41	696	16.8847	992	1975	23.0356	15	1975	23.2213	992	1434	10.5362	7	1434	10.6212	992	1368.33	16.7738	1247	17.9577	84	1247	18.1025	992	683	9.52309	6	683	9.59989	992	2808	21.6881	16	2808	21.863	992	1579.33	16.3896	206	14.8218	15	206	14.9414	992	1525	18.5228	12
[truncated: 33 more columns]

## Sheet: Andean lupin (B)
	Table S2. Transcriptomics data related to amino acid metabolism in white lupin (A) and Andean lupin (B) embryonic axes. The axes were isolated from imbibed seeds and cultured in vitro for 96 h on a medium with (+S) and without (-S) 60 mM sucrose. Culture media were also enriched with 35 mM asparagine (+Asn). Data were obtained from three independent in vitro cultures and three independent sequenc…
	+S																				+S+Asn																				-S
	Sequencing 1						Sequencing 2						Sequencing 3						Means	Normalized means	Sequencing 1						Sequencing 2						Sequencing 3						Means	Normalized means	Sequencing 1						Sequencing 2
Feature ID	group 1 - 180518_SNK268_B_L005_APBZ-1-1_R1 trimmed-1 (GE)-1 - Expression values	group 1 - 180518_SNK268_B_L005_APBZ-1-1_R1 trimmed-1 (GE)-1 - Normalized expression values	group 1 - 180518_SNK268_B_L005_APBZ-1-1_R1 trimmed-1 (GE)-1 - Unique gene reads	group 1 - 180518_SNK268_B_L005_APBZ-1-1_R1 trimmed-1 (GE)-1 - Total gene reads	group 1 - 180518_SNK268_B_L005_APBZ-1-1_R1 trimmed-1 (GE)-1 - RPKM	group 1 - 180518_SNK268_B_L005_APBZ-1-1_R1 trimmed-1 (GE)-1 - Chromosome region end	group 1 - 190517_SNK268_A_L001_APBZ-2-1 (GE) - Expression values	group 1 - 190517_SNK268_A_L001_APBZ-2-1 (GE) - Normalized expression values	group 1 - 190517_SNK268_A_L001_APBZ-2-1 (GE) - Unique gene reads	group 1 - 190517_SNK268_A_L001_APBZ-2-1 (GE) - Total gene reads	group 1 - 190517_SNK268_A_L001_APBZ-2-1 (GE) - RPKM	group 1 - 190517_SNK268_A_L001_APBZ-2-1 (GE) - Chromosome region end	group 1 - 210217_A00902_B_APBZ-3-1 (GE) - Expression values	group 1 - 210217_A00902_B_APBZ-3-1 (GE) - Normalized expression values	group 1 - 210217_A00902_B_APBZ-3-1 (GE) - Unique gene reads	group 1 - 210217_A00902_B_APBZ-3-1 (GE) - Total gene reads	group 1 - 210217_A00902_B_APBZ-3-1 (GE) - RPKM	group 1 - 210217_A00902_B_APBZ-3-1 (GE) - Chromosome region end	group 1 - Means	group 1 - Normalized means	group 2 - 180518_SNK268_B_L005_APBZ-1-2_R1 trimmed (GE)-1 - Expression values	group 2 - 180518_SNK268_B_L005_APBZ-1-2_R1 trimmed (GE)-1 - Normalized expression values	group 2 - 180518_SNK268_B_L005_APBZ-1-2_R1 trimmed (GE)-1 - Unique gene reads	group 2 - 180518_SNK268_B_L005_APBZ-1-2_R1 trimmed (GE)-1 - Total gene reads	group 2 - 180518_SNK268_B_L005_APBZ-1-2_R1 trimmed (GE)-1 - RPKM	group 2 - 180518_SNK268_B_L005_APBZ-1-2_R1 trimmed (GE)-1 - Chromosome region end	group 2 - 190517_SNK268_A_L001_APBZ-2-2 (GE) - Expression values	group 2 - 190517_SNK268_A_L001_APBZ-2-2 (GE) - Normalized expression values	group 2 - 190517_SNK268_A_L001_APBZ-2-2 (GE) - Unique gene reads	group 2 - 190517_SNK268_A_L001_APBZ-2-2 (GE) - Total gene reads	group 2 - 190517_SNK268_A_L001_APBZ-2-2 (GE) - RPKM	group 2 - 190517_SNK268_A_L001_APBZ-2-2 (GE) - Chromosome region end	group 2 - 210217_A00902_B_L002_APBZ-3-2 (GE)-1 - Expression values	group 2 - 210217_A00902_B_L002_APBZ-3-2 (GE)-1 - Normalized expression values	group 2 - 210217_A00902_B_L002_APBZ-3-2 (GE)-1 - Unique gene reads	group 2 - 210217_A00902_B_L002_APBZ-3-2 (GE)-1 - Total gene reads	group 2 - 210217_A00902_B_L002_APBZ-3-2 (GE)-1 - RPKM	group 2 - 210217_A00902_B_L002_APBZ-3-2 (GE)-1 - Chromosome region end	group 2 - Means	group 2 - Normalized means	group 3 - 180518_SNK268_B_L005_APBZ-1-3_R1 trimmed (GE)-1 - Expression values	group 3 - 180518_SNK268_B_L005_APBZ-1-3_R1 trimmed (GE)-1 - Normalized expression values	group 3 - 180518_SNK268_B_L005_APBZ-1-3_R1 trimmed (GE)-1 - Unique gene reads	group 3 - 180518_SNK268_B_L005_APBZ-1-3_R1 trimmed (GE)-1 - Total gene reads	group 3 - 180518_SNK268_B_L005_APBZ-1-3_R1 trimmed (GE)-1 - RPKM	group 3 - 180518_SNK268_B_L005_APBZ-1-3_R1 trimmed (GE)-1 - Chromosome region end	group 3 - 190517_SNK268_A_L001_APBZ-2-3 (GE) - Expression values	group 3 - 190517_SNK268_A_L001_APBZ-2-3 (GE) - Normalized expression values	group 3 - 190517_SNK268_A_L001_APBZ-2-3 (GE) - Unique gene reads
XM_019591619.1	3544	100.731	3544	3544	83.2484	1210	4942	61.8977	4942	4942	51.1552	1210	8089	66.8157	8089	8089	55.2196	1210	5525	76.4814	4528	76.8421	4528	4528	63.5058	1210	4208	50.8192	4208	4208	41.9994	1210	9192	72.362	9192	9192	59.8033	1210	5976	66.6744	5570	183.39	5570	5570	151.562	1210	16363	196.734	16363
XM_019598679.1	6907	196.317	6859	6907	69.7395	2815	15816	198.093	15809	15816	70.3705	2815	51935	428.987	51863	51935	152.393	2815	24886	274.465	15460	262.363	15333	15460	93.2017	2815	17244	208.253	17235	17244	73.9796	2815	37281	293.487	37242	37281	104.258	2815	23328.3	254.701	4096	134.859	4053	4096	47.9072	2815	9298	111.791	9286
XM_019605911.1	83137	2362.99	0	83137	1127.92	2095	215861	2703.62	0	215861	1290.51	2095	334373	2761.95	0	334373	1318.35	2095	211124	2609.52	137965	2341.32	0	137965	1117.58	2095	234750	2835.03	0	234750	1353.24	2095	285604	2248.36	0	285604	1073.2	2095	219440	2474.9	97154	3198.75	0	97154	1526.85	2095	262051	3150.66	0
XM_019562658.1	7390	210.045	7045	7390	109.171	1924	2856	35.7709	2678	2856	18.592	1924	4900	40.4744	4648	4900	21.0366	1924	5048.67	95.4301	12685	215.27	12025	12685	111.887	1924	2926	35.3368	2768	2926	18.3663	1924	3315	26.0966	3119	3315	13.5637	1924	6308.67	92.2344	10392	342.152	9506	10392	177.834	1924	7773	93.4554	7510
XM_019591458.1	5360	152.347	5156	5360	71.4906	2131	13119	164.313	12769	13119	77.1062	2131	14245	117.665	13791	14245	55.2157	2131	10908	144.775	7848	133.184	7550	7848	62.4983	2131	24071	290.701	23519	24071	136.415	2131	11873	93.4676	11514	11873	43.8609	2131	14597.3	172.451	50827	1673.46	47214	50827	785.291	2131	145415	1748.34	142500
XM_019560103.1	1048	29.7872	1048	1048	16.0232	1859	2908	36.4222	2908	2908	19.5924	1859	4514	37.286	4514	4514	20.057	1859	2823.33	34.4984	2060	34.9591	2060	2060	18.8053	1859	3955	47.7638	3955	3955	25.6933	1859	4079	32.111	4079	4079	17.2733	1859	3364.67	38.278	1003	33.0233	1003	1003	17.764	1859	3363	40.4336	3363
XM_019583239.1	1290	36.6655	1290	1290	21.8898	1675	3440	43.0854	3440	3440	25.7226	1675	5642	46.6033	5642	5642	27.8229	1675	3457.33	42.1181	3379	57.3431	3379	3379	34.2347	1675	3924	47.3894	3923	3924	28.2922	1675	6909	54.3896	6909	6909	32.4714	1675	4737.33	53.0407	1033	34.011	1033	1033	20.3051	1675	1767	21.2448	1767
XM_019558566.1	907	25.7795	893	907	16.0921	1602	2272	28.4564	2268	2272	17.7631	1602	3701	30.5705	3681	3701	19.0827	1602	2293.33	28.2688	1549	26.2872	1517	1549	16.409	1602	2709	32.7161	2705	2709	20.422	1602	6366	50.115	6341	6366	31.2827	1602	3541.33	36.3727	655	21.5656	639	655	13.4617	1602	1593	19.1528	1591
XM_019572931.1	533	15.1494	531	533	11.5117	1316	425	5.32306	425	425	4.04488	1316	1818	15.0168	1811	1818	11.411	1316	925.333	11.8297	1732	29.3928	1709	1732	22.3349	1316	3839	46.3629	3806	3839	35.2302	1316	3679	28.9621	3654	3679	22.0077	1316	3083.33	34.9059	3121	102.757	3091	3121	78.0832	1316	10649	128.034	10606
XM_019568374.1	121	3.43917	121	121	2.21026	1556	325	4.07057	324	325	2.61605	1556	591	4.8817	590	591	3.13734	1556	345.667	4.13048	239	4.05593	239	239	2.60664	1556	631	7.62047	627	631	4.89747	1556	452	3.55827	450	452	2.28681	1556	440.667	5.07822	8162	268.73	8143	8162	172.706	1556	24831	298.545	24822
XM_019589483.1	213	6.05407	197	213	3.88081	1560	686	8.59204	670	686	5.50772	1560	697	5.75727	687	697	3.69056	1560	532	6.80113	320	5.43054	300	320	3.48111	1560	536	6.47317	527	536	4.14947	1560	594	4.67614	588	594	2.99752	1560	483.333	5.52661	88	2.89736	85	88	1.85728	1560	367	4.41247	353
XM_019559247.1	1064	30.2419	39	1064	4.9262	6139	8539	106.95	288	8539	17.4213	6139	5300	43.7784	170	5300	7.13119	6139	4967.67	60.3233	1910	32.4135	76	1910	5.27993	6139	10394	125.526	362	10394	20.4474	6139	6531	51.4139	233	6531	8.37496	6139	6278.33	69.7846	767	25.2531	29	767	4.11355	6139	2386	28.6871	109
XM_019561320.1	1193	33.9085	1182	1193	4.77651	7099	4798	60.0942	4789	4798	8.46516	7099	4774	39.4336	4756	4774	5.55481	7099	3588.33	44.4787	1729	29.3419	1723	1729	4.13324	7099	6308	76.1805	6298	6308	10.7312	7099	3592	28.2772	3580	3592	3.98327	7099	3876.33	44.5999	429	14.1246	426	429	1.98966	7099	925	11.1214	923
XM_019564520.1	4154	118.069	4148	4154	89.3782	1321	27078	339.148	27075	27078	256.735	1321	47738	394.319	47707	47738	298.501	1321	26323.3	283.845	11815	200.506	11785	11815	151.783	1321	49351	596.003	49346	49351	451.175	1321	34106	268.492	34087	34106	203.249	1321	31757.3	355	3083	101.506	3074	3083	76.8405	1321	11803	141.908	11803
XM_019574925.1	3082	87.5992	3064	3082	63.8013	1373	6969	87.2856	6964	6969	63.5729	1373	11976	98.9226	11964	11976	72.0485	1373	7342.33	91.2692	6560	111.326	6524	6560	81.0823	1373	7434	89.779	7430	7434	65.3889	1373	14296	112.542	14289	14296	81.9681	1373	9430	104.549	2054	67.627	2040	2054	49.2549	1373	6153	73.978	6153
XM_019601473.1	7912	224.882	293	7912	152.981	1470	19566	245.061	661	19566	166.708	1470	30591	252.684	1095	30591	171.894	1470	19356.3	240.875	14402	244.408	445	14402	166.264	1470	23334	281.8	698	23334	191.701	1470	37001	291.282	1346	37001	198.151	1470	24912.3	272.497	4687	154.317	158	4687	104.978	1470	15520	186.598	496
XM_019569101.1	922	26.2059	922	922	16.4094	1597	2368	29.6588	2368	2368	18.5716	1597	4111	33.9572	4109	4111	21.2631	1597	2467	29.9406	1682	28.5443	1682	1682	17.8737	1597	2989	36.0976	2989	2989	22.6034	1597	3946	31.064	3946	3946	19.4515	1597	2872.33	31.902	617	20.3144	617	617	12.7204	1597	1753	21.0765	1753
XM_019577070.1	1561	44.3681	211	1561	27.6954	1602	6223	77.9421	582	6223	48.653	1602	9990	82.5181	901	9990	51.5094	1602	5924.67	68.2761	3636	61.7045	385	3636	38.5171	1602	7473	90.25	616	7473	56.3358	1602	11025	86.7919	1015	11025	54.1772	1602	7378	79.5821	745	24.5288	111	745	15.3113	1602	3119	37.5	284
XM_019597325.1	594	16.8832	570	594	9.43722	1789	1849	23.1584	1819	1849	12.9449	1789	2759	22.7895	2681	2759	12.7387	1789	1734	20.9437	1169	19.8384	1123	1169	11.0891	1789	1873	22.6199	1827	1873	12.6439	1789	2992	23.5539	2944	2992	13.1659	1789	2011.33	22.0041	585	19.2608	550	585	10.7663	1789	1400	16.8323	1360
XM_019606336.1	2502	71.114	30	2502	45.9987	1546	7046	88.25	208	7046	57.0828	1546	10236	84.5501	335	10236	54.6896	1546	6594.67	81.3047	5604	95.1022	132	5604	61.515	1546	8339	100.709	234	8339	65.1414	1546	11644	91.6649	471	11644	59.2916	1546	8529	95.8252	1343	44.2176	25	1343	28.6013	1546	5006	60.1875	168
XM_019569218.1	2473	70.2897	137	2473	27.1599	2588	5105	63.9393	353	5105	24.7061	2588	6589	54.4256	584	6589	21.03	2588	4722.33	62.8849	3855	65.421	171	3855	25.2786	2588	5251	63.4153	417	5251	24.5036	2588	6293	49.5403	452	6293	19.1423	2588	5133	59.4589	2097	69.0427	110	2097	26.678	2588	5219	62.7485	396
XM_019560238.1	328	9.3227	327	328	6.98329	1335	4034	50.5252	4034	4034	37.8466	1335	7986	65.9649	7986	7986	49.4119	1335	4116	41.9376	826	14.0176	825	826	10.5001	1335	2899	35.0107	2899	2899	26.2252	1335	2522	19.8539	2522	2522	14.8718	1335	2082.33	22.9607	65	2.14009	57	65	1.60307	1335	501	6.02356	497
XM_019606087.1	3481	98.94	3481	3481	37.3358	2650	7367	92.2705	7366	7367	34.819	2650	11514	95.1065	11514	11514	35.8892	2650	7454	95.439	6413	108.831	6413	6413	41.0684	2650	8146	98.3777	8146	8146	37.1237	2650	13162	103.615	13162	13162	39.1	2650	9240.33	103.608	3115	102.56	3115	3115	38.7019	2650	9367	112.62	9367
XM_019603532.1	174	4.94558	25	174	4.00128	1236	483	6.0495	99	483	4.89441	1236	736	6.07941	164	736	4.91862	1236	464.333	5.6915	406	6.88999	64	406	5.57443	1236	544	6.56979	107	544	5.31536	1236	854	6.72293	157	854	5.43926	1236	601.333	6.72757	157	5.16915	22	157	4.18216	1236	490	5.89131	98
XM_019579048.1	147	4.17816	147	147	3.94911	1058	412	5.16023	412	412	4.87735	1058	618	5.10472	618	618	4.82488	1058	392.333	4.81437	339	5.75297	339	339	5.43759	1058	321	3.87666	321	321	3.66414	1058	491	3.86529	491	491	3.65339	1058	383.667	4.49831	111	3.65462	111	111	3.45427	1058	384	4.61686	384
XR_002109301.1	2597	73.8142	0	2597	75.0907	983	5846	73.2202	0	5846	74.4865	983	6837	56.4741	0	6837	57.4508	983	5093.33	67.8362	4386	74.4323	0	4386	75.7195	983	5449	65.8065	0	5449	66.9446	983	9216	72.551	0	9216	73.8057	983	6350.33	70.9299	1582	52.0866	0	1582	52.9874	983	6342	76.2504	0
[truncated: 33 more columns]
