# Supplementary material for: Sugar Starvation Disrupts Lipid Breakdown by Inducing Autophagy in Embryonic Axes of Lupin (Lupinus spp.) Germinating Seeds
Source: Int J Mol Sci. 2023 Jul 21;24(14):11773. doi: 10.3390/ijms241411773 (PMC10380618; doi:10.3390/ijms241411773)
Supplement: Supplementary file 1 [file ijms-24-11773-s001.zip › Table S3.xlsx]

## Sheet: White lupin (A)
	Table S3. Transcriptomics data related to lipid degradation in white lupin (A) and Andean lupin (B) embryonic axes. The axes were isolated from imbibed seeds and cultured in vitro for 96 h on a medium with (+S) and without (-S) 60 mM sucrose. Culture media were also enriched with 35 mM asparagine (+Asn). Data were obtained from three independent in vitro cultures and three independent sequencings…
	+S																				+S+Asn																				-S
	Sequencing 1						Sequencing 2						Sequencing 3						Means	Normalized means	Sequencing 1						Sequencing 2						Sequencing 3						Means	Normalized means	Sequencing 1						Sequencing 2
Feature ID	group 5 - 180518_SNK268_B_L005_APBZ-1-5_R1 trimmed (GE)-1 - Expression values	group 5 - 180518_SNK268_B_L005_APBZ-1-5_R1 trimmed (GE)-1 - Normalized expression values	group 5 - 180518_SNK268_B_L005_APBZ-1-5_R1 trimmed (GE)-1 - Unique gene reads	group 5 - 180518_SNK268_B_L005_APBZ-1-5_R1 trimmed (GE)-1 - Total gene reads	group 5 - 180518_SNK268_B_L005_APBZ-1-5_R1 trimmed (GE)-1 - RPKM	group 5 - 180518_SNK268_B_L005_APBZ-1-5_R1 trimmed (GE)-1 - Chromosome region end	group 5 - 190517_SNK268_A_L001_APBZ-2-5 (GE) - Expression values	group 5 - 190517_SNK268_A_L001_APBZ-2-5 (GE) - Normalized expression values	group 5 - 190517_SNK268_A_L001_APBZ-2-5 (GE) - Unique gene reads	group 5 - 190517_SNK268_A_L001_APBZ-2-5 (GE) - Total gene reads	group 5 - 190517_SNK268_A_L001_APBZ-2-5 (GE) - RPKM	group 5 - 190517_SNK268_A_L001_APBZ-2-5 (GE) - Chromosome region end	group 5 - 210217_A00902_B_L002_APBZ-3-5 (GE) - Expression values	group 5 - 210217_A00902_B_L002_APBZ-3-5 (GE) - Normalized expression values	group 5 - 210217_A00902_B_L002_APBZ-3-5 (GE) - Unique gene reads	group 5 - 210217_A00902_B_L002_APBZ-3-5 (GE) - Total gene reads	group 5 - 210217_A00902_B_L002_APBZ-3-5 (GE) - RPKM	group 5 - 210217_A00902_B_L002_APBZ-3-5 (GE) - Chromosome region end	group 5 - Means	group 5 - Normalized means	group 6 - 180518_SNK268_B_L005_APBZ-1-6_R1 trimmed (GE)-1 - Expression values	group 6 - 180518_SNK268_B_L005_APBZ-1-6_R1 trimmed (GE)-1 - Normalized expression values	group 6 - 180518_SNK268_B_L005_APBZ-1-6_R1 trimmed (GE)-1 - Unique gene reads	group 6 - 180518_SNK268_B_L005_APBZ-1-6_R1 trimmed (GE)-1 - Total gene reads	group 6 - 180518_SNK268_B_L005_APBZ-1-6_R1 trimmed (GE)-1 - RPKM	group 6 - 180518_SNK268_B_L005_APBZ-1-6_R1 trimmed (GE)-1 - Chromosome region end	group 6 - 190517_SNK268_A_L001_APBZ-2-6 (GE) - Expression values	group 6 - 190517_SNK268_A_L001_APBZ-2-6 (GE) - Normalized expression values	group 6 - 190517_SNK268_A_L001_APBZ-2-6 (GE) - Unique gene reads	group 6 - 190517_SNK268_A_L001_APBZ-2-6 (GE) - Total gene reads	group 6 - 190517_SNK268_A_L001_APBZ-2-6 (GE) - RPKM	group 6 - 190517_SNK268_A_L001_APBZ-2-6 (GE) - Chromosome region end	group 6 - 210217_A00902_B_L002_APBZ-3-6 (GE) - Expression values	group 6 - 210217_A00902_B_L002_APBZ-3-6 (GE) - Normalized expression values	group 6 - 210217_A00902_B_L002_APBZ-3-6 (GE) - Unique gene reads	group 6 - 210217_A00902_B_L002_APBZ-3-6 (GE) - Total gene reads	group 6 - 210217_A00902_B_L002_APBZ-3-6 (GE) - RPKM	group 6 - 210217_A00902_B_L002_APBZ-3-6 (GE) - Chromosome region end	group 6 - Means	group 6 - Normalized means	group 7 - 180518_SNK268_B_L005_APBZ-1-7_R1 trimmed (GE)-1 - Expression values	group 7 - 180518_SNK268_B_L005_APBZ-1-7_R1 trimmed (GE)-1 - Normalized expression values	group 7 - 180518_SNK268_B_L005_APBZ-1-7_R1 trimmed (GE)-1 - Unique gene reads	group 7 - 180518_SNK268_B_L005_APBZ-1-7_R1 trimmed (GE)-1 - Total gene reads	group 7 - 180518_SNK268_B_L005_APBZ-1-7_R1 trimmed (GE)-1 - RPKM	group 7 - 180518_SNK268_B_L005_APBZ-1-7_R1 trimmed (GE)-1 - Chromosome region end	group 7 - 190517_SNK268_A_L001_APBZ-2-7 (GE) - Expression values	group 7 - 190517_SNK268_A_L001_APBZ-2-7 (GE) - Normalized expression values	group 7 - 190517_SNK268_A_L001_APBZ-2-7 (GE) - Unique gene reads
XM_019575996.1	3510	84.4702	3442	3510	50.0713	1687	6206	72.3842	6116	6206	42.907	1687	10292	75.6197	10150	10292	44.825	1687	6669.33	77.4914	5810	83.6681	5664	5810	49.5958	1687	5823	81.1903	5760	5823	48.127	1687	11246	86.8605	11090	11246	51.4881	1687	7626.33	83.9063	792	56.9849	776	792	33.7788	1687	4255	51.6817	4210
XM_019593120.1	1127	27.1219	1122	1127	19.3039	1405	2033	23.7121	2033	2033	16.8769	1405	3724	27.3618	3718	3724	19.4746	1405	2294.67	26.0653	1728	24.8844	1719	1728	17.7113	1405	1490	20.7751	1488	1490	14.7866	1405	2250	17.3783	2248	2250	12.3689	1405	1822.67	21.0126	208	14.9657	208	208	10.6518	1405	1198	14.551	1198
XM_019607867.1	156	3.75423	155	156	2.50449	1499	309	3.60405	309	309	2.4043	1499	731	5.37097	727	731	3.58304	1499	398.667	4.24308	343	4.93944	342	343	3.29516	1499	269	3.75067	269	269	2.50212	1499	618	4.77323	617	618	3.18428	1499	410	4.48778	59	4.24509	58	59	2.83195	1499	247	3.00009	247
XM_019557615.1	7980	192.043	7755	7980	55.6325	3452	13038	152.07	12848	13038	44.0526	3452	22175	162.929	21861	22175	47.1985	3452	14397.7	169.014	11885	171.152	11520	11885	49.5807	3452	10855	151.352	10681	10855	43.8446	3452	20936	161.703	20650	20936	46.8433	3452	14558.7	161.402	1752	126.057	1703	1752	36.5172	3452	9032	109.704	8928
XM_019593386.1	5773	138.931	347	5773	42.3698	3279	9241	107.783	478	9241	32.8707	3279	14541	106.839	874	14541	32.5828	3279	9851.67	117.851	8879	127.864	566	8879	38.9948	3279	7332	102.23	369	7332	31.1773	3279	13568	104.795	799	13568	31.9594	3279	9926.33	111.63	1188	85.4773	76	1188	26.0681	3279	5539	67.2773	304
XM_019608239.1	3179	76.5045	3167	3179	33.2484	2301	7313	85.2957	7311	7313	37.069	2301	10092	74.1502	10084	10092	32.2252	2301	6861.33	78.6502	6392	92.0493	6376	6392	40.0041	2301	5422	75.5991	5422	5422	32.8549	2301	9239	71.3591	9237	9239	31.0122	2301	7017.67	79.6692	3370	242.474	3365	3370	105.377	2301	19696	239.23	19685
XM_019593502.1	2658	63.9663	2658	2658	28.2787	2262	4250	49.5702	4250	4250	21.9143	2262	8029	58.9925	8029	8029	26.0798	2262	4979	57.5097	3407	49.0632	3407	3407	21.6902	2262	3194	44.534	3194	3194	19.6879	2262	7913	61.1175	7913	7913	27.0192	2262	4838	51.5716	1026	73.8213	1026	1026	32.6354	2262	4401	53.455	4401
XM_019590516.1	8238	198.252	8238	8238	125.954	1574	17107	199.529	17107	17107	126.765	1574	21624	158.881	21624	21624	100.941	1574	15656.3	185.554	16087	231.664	16087	16087	147.182	1574	14600	203.568	14600	14600	129.332	1574	27534	212.664	27533	27534	135.11	1574	19407	215.965	9477	681.876	9477	9477	433.212	1574	43792	531.902	43787
XM_019580670.1	8397	202.079	8321	8397	113.847	1775	18653	217.561	18627	18653	122.569	1775	27068	198.88	27007	27068	112.045	1775	18039.3	206.173	11358	163.563	11245	11358	92.1483	1775	10970	152.955	10957	10970	86.1718	1775	19169	148.055	19129	19169	83.4114	1775	13832.3	154.858	1208	86.9164	1200	1208	48.967	1775	7382	89.6626	7369
XM_019560030.1	2060	49.5751	302	2060	26.0374	1904	1820	21.2277	436	1820	11.149	1904	4590	33.7247	935	4590	17.7125	1904	2823.33	34.8425	1847	26.5981	396	1847	13.9696	1904	1687	23.5219	392	1687	12.3539	1904	4091	31.5976	805	4091	16.5954	1904	2541.67	27.2392	214	15.3974	38	214	8.08689	1904	913	11.0894	197
XM_019582899.1	947	22.7901	129	947	11.4351	1993	1712	19.968	300	1712	10.0191	1993	3065	22.5199	387	3065	11.2995	1993	1908	21.7593	1413	20.3482	171	1413	10.2098	1993	1465	20.4265	241	1465	10.2491	1993	2893	22.3446	386	2893	11.2115	1993	1923.67	21.0398	231	16.6206	28	231	8.33949	1993	1178	14.3081	160
XM_019559290.1	10646	256.202	659	10646	140.001	1830	33574	391.593	2197	33574	213.985	1830	57991	426.085	3739	57991	232.833	1830	34070.3	357.96	19044	274.247	1203	19044	149.862	1830	24564	342.497	1684	24564	187.157	1830	78666	607.591	5303	78666	332.017	1830	40758	408.112	5979	430.193	405	5979	235.078	1830	47216	573.491	2969
XM_019597834.1	7494	180.348	7490	7494	100.697	1791	15308	178.546	15302	15308	99.6907	1791	25314	185.993	25295	25314	103.849	1791	16038.7	181.629	11285	162.512	11279	11285	90.7381	1791	11895	165.852	11895	11895	92.6032	1791	23602	182.294	23597	23602	101.784	1791	15594	170.22	2009	144.549	2007	2009	80.7084	1791	13167	159.928	13163
XM_019605692.1	2955	71.1138	131	2955	38.7964	1833	5632	65.6893	345	5632	35.837	1833	9358	68.7572	773	9358	37.5108	1833	5981.67	68.5201	5166	74.3941	195	5166	40.586	1833	4758	66.3409	337	4758	36.1925	1833	9392	72.5408	788	9392	39.5749	1833	6438.67	71.0919	1124	80.8725	44	1124	44.1203	1833	5337	64.8238	330
XM_019580178.1	2075	49.9361	2075	2075	31.2687	1597	4013	46.8059	4013	4013	29.3087	1597	6833	50.205	6833	6833	31.4371	1597	4307	48.9823	3497	50.3593	3497	3497	31.5337	1597	3290	45.8726	3290	3290	28.7242	1597	6674	51.5478	6674	6674	32.2779	1597	4487	49.2599	528	37.9899	528	528	23.7883	1597	3166	38.4546	3166
XM_019597691.1	5277	126.994	5187	5277	66.1428	1920	8079	94.2301	8027	8079	49.0782	1920	15512	113.973	15414	15512	59.3611	1920	9622.67	111.732	7940	114.342	7769	7940	59.5529	1920	8962	124.957	8937	8962	65.082	1920	13440	103.806	13386	13440	54.0658	1920	10114	114.368	460	33.0973	458	460	17.2382	1920	3005	36.499	2991
XM_019588744.1	10580	254.614	10235	10580	177.679	1433	18487	215.625	18163	18487	150.471	1433	34671	254.743	34032	34671	177.769	1433	21246	241.66	15287	220.144	14783	15287	153.624	1433	15959	222.517	15708	15959	155.28	1433	35270	272.414	34652	35270	190.101	1433	22172	238.358	1891	136.059	1839	1891	94.9467	1433	11775	143.02	11635
XM_019599121.1	4006	96.4068	3903	4006	68.3251	1411	7866	91.7457	7605	7866	65.0218	1411	15119	111.086	14658	15119	78.7284	1411	8997	99.7461	5946	85.6266	5763	5946	60.6851	1411	6910	96.3463	6648	6910	68.2823	1411	14764	114.032	14289	14764	80.8167	1411	9206.67	98.6685	620	44.6094	606	620	31.6154	1411	3878	47.1026	3762
XM_019582541.1	1179	28.3733	1179	1179	24.651	1151	2504	29.2056	2504	2504	25.3741	1151	3743	27.5014	3743	3743	23.8935	1151	2475.33	28.3601	2088	30.0687	2088	2088	26.124	1151	2014	28.0813	2014	2014	24.3973	1151	4014	31.0029	4014	4014	26.9356	1151	2705.33	29.7176	624	44.8972	624	624	39.0071	1151	3405	41.3575	3405
XM_019588727.1	2761	66.4451	2725	2761	48.9647	1357	4760	55.5186	4740	4760	40.9128	1357	8929	65.6052	8878	8929	48.3458	1357	5483.33	62.523	3700	53.2826	3635	3700	39.265	1357	3633	50.655	3613	3633	37.3287	1357	10199	78.7738	10108	10199	58.05	1357	5844	60.9038	650	46.7679	641	650	34.4642	1357	3240	39.3534	3210
XM_019570389.1	5962	143.479	5883	5962	106.438	1348	6619	77.2012	6579	6619	57.2709	1348	21924	161.085	21831	21924	119.499	1348	11501.7	127.255	5687	81.8968	5588	5687	60.7543	1348	6481	90.3648	6455	6481	67.0362	1348	14724	113.723	14611	14724	84.3646	1348	8964	95.3284	355	25.5425	345	355	18.9484	1348	1849	22.4581	1831
XM_019600468.1	25429	611.964	25057	25429	433.709	1411	47749	556.924	47559	47749	394.702	1411	73720	541.652	73372	73720	383.878	1411	48966	570.18	43456	625.797	42938	43456	443.513	1411	41700	581.424	41541	41700	412.065	1411	79473	613.824	79149	79473	435.028	1411	54876.3	607.015	6188	445.23	6106	6188	315.542	1411	35437	430.422	35282
XM_019597559.1	5191	124.924	5190	5191	70.539	1771	9283	108.273	9283	9283	61.1366	1771	14371	105.59	14359	14371	59.6216	1771	9615	112.929	7605	109.517	7600	7605	61.8393	1771	9169	127.844	9165	9169	72.1873	1771	16444	127.008	16434	16444	71.7155	1771	11072.7	121.456	1008	72.5262	1006	1008	40.9521	1771	5694	69.1599	5690
XM_019576948.1	6994	168.315	6994	6994	82.2251	2047	12598	146.938	12598	12598	71.782	2047	21439	157.522	21439	21439	76.9524	2047	13677	157.591	10119	145.721	10119	10119	71.1875	2047	11874	165.56	11874	11874	80.8791	2047	22950	177.258	22950	22950	86.5943	2047	14981	162.846	1335	96.0541	1335	1335	46.9243	2047	8371	101.675	8370
XM_019579441.1	42564	1024.33	41390	42564	736.397	1391	80398	937.728	79831	80398	674.14	1391	139236	1023.03	138100	139236	735.461	1391	87399.3	995.028	69749	1004.44	67996	69749	722.096	1391	70747	986.427	70328	70747	709.15	1391	134856	1041.58	133883	134856	748.803	1391	91784	1010.82	9377	674.681	9216	9377	485.033	1391	58314	708.288	58065
XM_019559913.1	20056	482.66	19835	20056	356.997	1352	33906	395.465	33749	33906	292.504	1352	63859	469.199	63428	63859	347.041	1352	39273.7	449.108	30686	441.9	30354	30686	326.849	1352	32405	451.824	32282	32405	334.189	1352	67391	520.507	67079	67391	384.99	1352	43494	471.41	2861	205.851	2824	2861	152.256	1352	16859	204.771	16783
XM_019578482.1	26938	648.279	26078	26938	472.851	1371	44224	515.81	43866	44224	376.229	1371	92606	680.416	91364	92606	496.292	1371	54589.3	614.835	38479	554.125	37362	38479	404.176	1371	40920	570.549	40560	40920	416.155	1371	86600	668.871	85703	86600	487.871	1371	55333	597.848	3150	226.644	3081	3150	165.313	1371	16322	198.249	16211
XM_019568724.1	1100	26.4722	1085	1100	13.9034	1904	2246	26.1964	2238	2246	13.7586	1904	3335	24.5037	3313	3335	12.8696	1904	2227	25.7241	1661	23.9196	1637	1661	12.5628	1904	1652	23.0339	1644	1652	12.0976	1904	3526	27.2337	3517	3526	14.3034	1904	2279.67	24.7291	224	16.1169	218	224	8.46478	1904	1287	15.632	1284
XM_019576009.1	1956	47.0723	1891	1956	23.8341	1975	3700	43.1552	3687	3700	21.8508	1975	5639	41.4321	5601	5639	20.9783	1975	3765	43.8866	2834	40.8116	2757	2834	20.6641	1975	2771	38.6361	2758	2771	19.5626	1975	5757	44.4652	5737	5757	22.514	1975	3787.33	41.3043	457	32.8814	445	457	16.6488	1975	2495	30.3045	2489
XM_019590831.1	1226	29.5044	1203	1226	15.0226	1964	2542	29.6488	2540	2542	15.0961	1964	3182	23.3795	3173	3182	11.904	1964	2316.67	27.5109	2105	30.3135	2073	2105	15.4346	1964	2035	28.3741	2030	2035	14.4471	1964	4057	31.335	4044	4057	15.9547	1964	2732.33	30.0075	294	21.1535	291	294	10.7706	1964	1933	23.4784	1933
XM_019589074.1	699	16.8218	0	699	8.79804	1912	1057	12.3284	0	1057	6.44791	1912	1632	11.991	0	1632	6.27144	1912	1129.33	13.7138	1011	14.5591	0	1011	7.6146	1912	1287	17.9447	0	1287	9.38529	1912	2113	16.3201	0	2113	8.53564	1912	1470.33	16.2746	255	18.3474	0	255	9.59593	1912	1076	13.0692	0
XM_019601473.1	1319	31.7425	1	1319	21.5935	1470	2166	25.2633	2	2166	17.1859	1470	3503	25.738	3	3503	17.5089	1470	2329.33	27.5813	1682	24.222	0	1682	16.4775	1470	2039	28.4298	2	2039	19.34	1470	3795	29.3114	2	3795	19.9397	1470	2505.33	27.3211	245	17.6279	0	245	11.9918	1470	1137	13.8101	0
XM_019569101.1	1228	29.5525	1227	1228	18.505	1597	2738	31.9349	2738	2738	19.9968	1597	3808	27.979	3807	3808	17.5197	1597	2591.33	29.8221	2228	32.0848	2228	2228	20.0907	1597	2562	35.722	2562	2562	22.3682	1597	4556	35.1891	4556	4556	22.0345	1597	3115.33	34.332	255	18.3474	255	255	11.4887	1597	1881	22.8468	1881
XM_019577070.1	2772	66.7098	332	2772	41.6416	1602	5445	63.5082	810	5445	39.6431	1602	9820	72.1517	1607	9820	45.0385	1602	6012.33	67.4566	3840	55.2987	429	3840	34.5186	1602	5295	73.8283	753	5295	46.0851	1602	10276	79.3685	1712	10276	49.5434	1602	6470.33	69.4985	352	25.3266	70	352	15.8094	1602	2754	33.4504	374
XM_019597325.1	874	21.0333	804	874	11.757	1789	1760	20.5279	1710	1760	11.4745	1789	2979	21.888	2917	2979	12.2348	1789	1871	21.1497	1426	20.5354	1348	1426	11.4787	1789	1447	20.1756	1397	1447	11.2776	1789	2770	21.3946	2710	2770	11.959	1789	1881	20.7019	278	20.0023	260	278	11.1807	1789	1597	19.3973	1553
XM_019606335.1	7847	188.843	437	7847	118.62	1592	8956	104.459	1147	8956	65.615	1592	14300	105.068	1897	14300	65.9976	1592	10367.7	132.79	11393	164.067	710	11393	103.057	1592	9297	129.628	1129	9297	81.4248	1592	16732	129.233	2175	16732	81.1763	1592	12474	140.976	1451	104.4	99	1451	65.5781	1592	5563	67.5688	690
XM_019596086.1	4627	111.351	192	4627	53.4316	2084	11126	129.769	982	11126	62.2692	2084	11079	81.4022	991	11079	39.0605	2084	8944	107.508	3716	53.513	184	3716	25.678	2084	12417	173.131	1168	12417	83.0761	2084	8601	66.4314	813	8601	31.8769	2084	8244.67	97.6917	2016	145.052	78	2016	69.6029	2084	3669	44.5641	331
XM_019566645.1	998	24.0175	998	998	15.5352	1546	2254	26.2897	2248	2254	17.005	1546	2883	21.1826	2877	2883	13.7016	1546	2045	23.8299	1641	23.6316	1635	1641	15.2856	1546	1765	24.6094	1761	1765	15.9181	1546	3328	25.7044	3316	3328	16.6264	1546	2244.67	24.6485	582	41.8753	579	582	27.0862	1546	3267	39.6813	3257
XM_019570213.1	1266	30.467	188	1266	21.2907	1431	3289	38.3615	592	3289	26.8075	1431	4833	35.5101	901	4833	24.8149	1431	3129.33	34.7796	2147	30.9183	326	2147	21.6061	1431	2288	31.9017	401	2288	22.2933	1431	4212	32.5321	849	4212	22.7339	1431	2882.33	31.784	1273	91.5931	180	1273	64.0064	1431	7058	85.7272	1075
XM_019585728.1	1393	33.5234	27	1393	14.886	2252	3984	46.4677	219	3984	20.634	2252	8969	65.8991	418	8969	29.2625	2252	4782	48.63	2937	42.2949	49	2937	18.781	2252	3049	42.5123	116	3049	18.8776	2252	4658	35.9769	171	4658	15.9755	2252	3548	40.2614	0	0	0	0	0	2252	1666	20.2354	71
XM_019566816.1	1601	38.529	1601	1601	16.7663	2298	3568	41.6156	3568	3568	18.1095	2298	5193	38.1552	5191	5193	16.6037	2298	3454	39.4333	2811	40.4804	2811	2811	17.6155	2298	2847	39.6958	2847	2847	17.2741	2298	5740	44.3339	5734	5740	19.2924	2298	3799.33	41.5034	734	52.8118	734	734	22.9816	2298	4368	53.0542	4367
XM_019596617.1	8095	194.811	7890	8095	136.422	1428	13916	162.31	13807	13916	113.663	1428	26550	195.074	26268	26550	136.607	1428	16187	184.065	12169	175.242	11826	12169	122.719	1428	12140	169.268	12051	12140	118.535	1428	25599	197.718	25366	25599	138.458	1428	16636	180.743	1156	83.1749	1117	1156	58.2457	1428	6889	83.6745	6844
XM_019607159.1	251	6.04046	31	251	4.51455	1338	583	6.79987	109	583	5.08211	1338	1109	8.1483	181	1109	6.08991	1338	647.667	6.99621	417	6.0051	69	417	4.48811	1338	388	5.4099	60	388	4.04327	1338	657	5.07446	114	657	3.79257	1338	487.333	5.49648	58	4.17314	11	58	3.11894	1338	386	4.6884	55
XR_002105784.1	589	14.1746	0	589	10.7221	1322	1832	21.3677	0	1832	16.1631	1322	3255	23.9159	4	3255	18.0907	1322	1892	19.8194	1110	15.9848	0	1110	12.0914	1322	1659	23.1315	0	1659	17.4973	1322	3019	23.3178	3	3019	17.6383	1322	1929.33	20.8114	275	19.7864	0	275	14.967	1322	3387	41.1389	0
XM_019572544.1	3710	89.2833	3622	3710	65.9404	1354	6545	76.3381	6481	6545	56.3797	1354	12688	93.2242	12542	12688	68.8509	1354	7647.67	86.2819	6236	89.8028	6033	6236	66.3241	1354	6207	86.5444	6162	6207	63.9176	1354	12513	96.6464	12381	12513	71.3784	1354	8318.67	90.9979	679	48.8545	653	679	36.0816	1354	3964	48.1472	3930
XM_019594403.1	1643	39.5398	276	1643	28.8611	1370	3094	36.0871	499	3094	26.341	1370	6010	44.158	1000	6010	32.2321	1370	3582.33	39.9283	1875	27.0013	316	1875	19.709	1370	2098	29.2525	341	2098	21.3522	1370	5657	43.6929	952	5657	31.8926	1370	3210	33.3156	382	27.4851	63	382	20.0621	1370	1919	23.3084	320
XM_019607520.1	2426	58.3831	2426	2426	32.6163	1790	4485	52.3111	4485	4485	29.2241	1790	6856	50.374	6856	6856	28.1419	1790	4589	53.6894	4333	62.3983	4333	4333	34.8594	1790	5950	82.961	5950	5950	46.3469	1790	8210	63.4114	8210	8210	35.4254	1790	6164.33	69.5902	1053	75.764	1053	1053	42.3263	1790	11107	134.907	11107
XM_019577897.1	2979	71.6914	118	2979	28.5169	2514	4754	55.4487	147	4754	22.0559	2514	7797	57.2879	228	7797	22.7875	2514	5176.67	61.476	4599	66.2289	150	4599	26.344	2514	4112	57.3337	117	4112	22.8058	2514	6795	52.4824	188	6795	20.8761	2514	5168.67	58.6817	768	55.2581	29	768	21.9801	2514	3583	43.5195	107
XM_019562376.1	1004	24.1619	1004	1004	11.5386	2094	1999	23.3155	1999	1999	11.1344	2094	2692	19.7793	2692	2692	9.44569	2094	1898.33	22.4189	3945	56.8108	3945	3945	27.1303	2094	2667	37.1861	2667	2667	17.7584	2094	3838	29.6435	3838	3838	14.1564	2094	3483.33	41.2134	3168	227.94	3168	3168	108.854	2094	13030	158.264	13030
XM_019564823.1	1645	39.5879	1634	1645	17.2121	2300	2607	30.4069	2603	2607	13.2204	2300	1951	14.3348	1946	1951	6.23254	2300	2067.67	28.1099	4090	58.8989	4071	4090	25.6082	2300	1565	21.8208	1561	1565	9.48732	2300	2023	15.625	2017	2023	6.79348	2300	2559.33	32.1149	1005	72.3104	1005	1005	31.4393	2300	7020	85.2657	7008
XM_019591765.1	330	7.94165	330	330	3.52492	2253	1123	13.0982	1119	1123	5.81367	2253	1263	9.2798	1257	1263	4.11886	2253	905.333	10.1065	741	10.6709	735	741	4.73632	2253	674	9.3976	670	674	4.17115	2253	1851	14.2965	1845	1851	6.34555	2253	1088.67	11.455	172	12.3755	172	172	5.4929	2253	961	11.6724	956
XM_019588164.1	12611	303.491	12596	12611	192.326	1578	23232	270.968	23214	23232	171.716	1578	43967	323.044	43917	43967	204.718	1578	26603.3	299.168	19371	278.956	19346	19371	176.778	1578	21338	297.516	21324	21338	188.54	1578	44810	346.098	44779	44810	219.327	1578	28506.3	307.524	2084	149.945	2081	2084	95.0222	1578	11117	135.028	11107
XM_019588160.1	3241	77.9966	3241	3241	44.5186	1752	10118	118.012	10118	10118	67.3585	1752	16512	121.321	16511	16512	69.247	1752	9957	105.776	5666	81.5944	5666	5666	46.5722	1752	7195	100.32	7194	7195	57.2603	1752	16508	127.503	16507	16508	72.7754	1752	9789.67	103.139	1003	72.1665	1003	1003	41.1909	1752	8858	107.59	8858
XM_019587269.1	528	12.7066	103	528	5.75221	2209	1437	16.7606	226	1437	7.5874	2209	1784	13.1078	338	1784	5.93382	2209	1249.67	14.1917	1072	15.4376	154	1072	6.98848	2209	922	12.8555	156	922	5.81959	2209	1899	14.6673	357	1899	6.63978	2209	1297.67	14.3201	210	15.1096	32	210	6.84003	2209	1226	14.8911	186
XM_019562097.1	618	14.8725	36	618	11.547	1288	1267	14.7778	104	1267	11.4734	1288	2402	17.6485	202	2402	13.7023	1288	1429	15.7663	812	11.6934	57	812	9.07871	1288	1296	18.0702	101	1296	14.0296	1288	2442	18.8612	187	2442	14.6438	1288	1516.67	16.2083	131	9.42553	12	131	7.31796	1288	979	11.891	83
XM_019607842.1	1936	46.591	1936	1936	44.246	1053	3851	44.9164	3851	3851	42.6557	1053	6359	46.7223	6359	6359	44.3706	1053	4048.67	46.0766	3040	43.7782	3040	3040	41.5747	1053	2682	37.3952	2682	2682	35.513	1053	5557	42.9205	5557	5557	40.7602	1053	3759.67	41.3646	710	51.0849	710	710	48.5137	1053	3764	45.7179	3764
XM_019560124.1	571	13.7415	571	571	7.90193	1739	1256	14.6495	1256	1256	8.42407	1739	1521	11.1754	1521	1521	6.42636	1739	1116	13.1888	915	13.1766	915	915	7.57714	1739	859	11.9771	859	859	6.88733	1739	1458	11.2611	1458	1458	6.47563	1739	1077.33	12.1383	201	14.4621	201	201	8.31632	1739	1170	14.2109	1170
XM_019586384.1	504	12.1291	504	504	6.06756	1999	986	11.5003	986	986	5.75302	1999	1625	11.9396	1625	1625	5.97277	1999	1038.33	11.8563	831	11.967	831	831	5.98649	1999	744	10.3736	744	744	5.1894	1999	1263	9.75501	1263	1263	4.87994	1999	946	10.6985	203	14.606	203	203	7.30664	1999	899	10.9193	899
XM_019557620.1	491	11.8162	76	491	12.283	962	1157	13.4948	328	1157	14.0278	962	2040	14.9888	597	2040	15.5808	962	1229.33	13.4332	867	12.4854	137	867	12.9786	962	925	12.8973	246	925	13.4068	962	2090	16.1425	676	2090	16.7801	962	1294	13.8417	146	10.5048	22	146	10.9197	962	618	7.50629	155
XM_019587595.1	1143	27.507	1069	1143	26.7578	1028	2798	32.6347	2777	2798	31.7458	1028	3730	27.4059	3684	3730	26.6594	1028	2557	29.1825	1687	24.294	1580	1687	23.6323	1028	1911	26.6451	1897	1911	25.9194	1028	3745	28.9252	3715	3745	28.1373	1028	2447.67	26.6214	226	16.2608	215	226	15.8179	1028	1447	17.5754	1435
XM_019603381.1	1738	41.826	32	1738	39.5331	1058	3158	36.8336	254	3158	34.8143	1058	5395	39.6394	513	5395	37.4663	1058	3430.33	39.433	3017	43.4469	67	3017	41.0652	1058	2679	37.3534	211	2679	35.3056	1058	5047	38.9814	467	5047	36.8444	1058	3581	39.9272	405	29.14	3	405	27.5425	1058	2055	24.9602	158
XM_019579304.1	483	11.6237	34	483	14.0044	830	1077	12.5617	200	1077	15.1345	830	1299	9.54431	289	1299	11.4992	830	953	11.2432	819	11.7942	61	819	14.2099	830	945	13.1762	216	945	15.8749	830	1421	10.9753	305	1421	13.2233	830	1061.67	11.9819	165	11.8719	11	165	14.3034	830	1124	13.6522	247
XM_019576147.1	1266	30.467	0	1266	42.3153	720	2160	25.1933	86	2160	34.9907	720	4093	30.073	142	4093	41.7681	720	2506.33	28.5778	1791	25.7917	0	1791	35.8218	720	1789	24.9441	116	1789	34.6446	720	3737	28.8634	162	3737	40.088	720	2439	26.533	198	14.2462	0	198	19.7864	720	1112	13.5065	56
XM_019579615.1	590	14.1987	538	590	24.0656	590	1104	12.8766	1100	1104	21.8247	590	1633	11.9983	1625	1633	20.3362	590	1109	13.0245	976	14.0551	887	976	23.8222	590	919	12.8136	907	919	21.718	590	1435	11.0835	1431	1435	18.7856	590	1110	12.6507	157	11.2962	146	157	19.1462	590	712	8.64803	708
XM_019585936.1	2189	52.6796	2189	2189	34.818	1513	4753	55.437	4753	4753	36.6404	1513	6941	50.9985	6941	6941	33.7069	1513	4627.67	53.0384	3858	55.5579	3858	3858	36.7204	1513	3248	45.287	3248	3248	29.9319	1513	6316	48.7828	6316	6316	32.2424	1513	4474	49.8759	735	52.8837	735	735	34.9529	1513	5031	61.1071	5031
XM_019578425.1	121	2.91194	121	121	1.97687	1473	216	2.51933	216	216	1.71034	1473	452	3.32104	452	452	2.25461	1473	263	2.91744	144	2.0737	144	144	1.40781	1473	168	2.34243	168	168	1.59024	1473	201	1.55246	201	201	1.05394	1473	171	1.98953	24	1.72681	24	24	1.17231	1473	105	1.27534	105
XM_019583143.1	1571	37.807	1571	1571	25.2721	1496	2063	24.062	2063	2063	16.0842	1496	3963	29.1179	3963	3963	19.4638	1496	2532.33	30.329	3018	43.4613	3018	3018	29.0517	1496	1770	24.6792	1770	1770	16.4968	1496	3959	30.578	3959	3959	20.4399	1496	2915.67	32.9062	492	35.3997	492	492	23.6629	1496	1967	23.8914	1967
XM_019588469.1	1284	30.9002	1284	1284	9.50484	3251	3095	36.0988	3095	3095	11.1039	3251	3568	26.2156	3568	3568	8.06386	3251	2649	31.0715	2283	32.8768	2283	2283	10.1128	3251	1953	27.2307	1953	1953	8.37611	3251	3482	26.8939	3482	3482	8.27249	3251	2572.67	29.0005	1823	131.166	1823	1823	40.3464	3251	8262	100.351	8262
XM_019580676.1	3245	78.0928	3182	3245	77.55	1007	6112	71.2878	6028	6112	70.7922	1007	10281	75.5389	10104	10281	75.0138	1007	6546	74.9732	5150	74.1637	5051	5150	73.6481	1007	5531	77.1189	5477	5531	76.5828	1007	12087	93.3561	11926	12087	92.7072	1007	7589.33	81.5462	642	46.1923	634	642	45.8712	1007	3346	40.6409	3310
XM_019592410.1	12023	289.341	11836	12023	261.138	1108	24584	286.737	24346	24584	258.788	1108	41238	302.993	40667	41238	273.46	1108	25948.3	293.024	18351	264.267	18094	18351	238.508	1108	21852	304.683	21600	21852	274.985	1108	43390	335.13	42884	43390	302.464	1108	27864.3	301.36	2011	144.693	1991	2011	130.589	1108	14147	171.831	14005
XM_019598482.1	95	2.28623	15	95	2.71202	843	216	2.51933	44	216	2.98853	843	270	1.98381	46	270	2.35327	843	193.667	2.26312	181	2.60653	45	181	3.09197	843	149	2.07751	59	149	2.46443	843	177	1.36709	29	177	1.6217	843	169	2.01704	16	1.15121	1	16	1.36561	843	229	2.78146	54
XM_019609589.1	183	4.404	183	183	4.9932	882	471	5.49355	471	471	6.22851	882	660	4.8493	660	660	5.49808	882	438	4.91562	319	4.59383	317	319	5.20842	882	295	4.11319	293	295	4.66348	882	627	4.84275	627	627	5.49064	882	413.667	4.51659	54	3.88533	54	54	4.40514	882	390	4.73698	390
[truncated: 33 more columns]

## Sheet: Andean lupin (B)
	Table S3. Transcriptomics data related to lipid degradation in white lupin (A) and Andean lupin (B) embryonic axes. The axes were isolated from imbibed seeds and cultured in vitro for 96 h on a medium with (+S) and without (-S) 60 mM sucrose. Culture media were also enriched with 35 mM asparagine (+Asn). Data were obtained from three independent in vitro cultures and three independent sequencings…
	+S																				+S+Asn																				-S
	Sequencing 1						Sequencing 2						Sequencing 3						Means	Normalized means	Sequencing 1						Sequencing 2						Sequencing 3						Means	Normalized means	Sequencing 1						Sequencing 2
Feature ID	group 1 - 180518_SNK268_B_L005_APBZ-1-1_R1 trimmed-1 (GE)-1 - Expression values	group 1 - 180518_SNK268_B_L005_APBZ-1-1_R1 trimmed-1 (GE)-1 - Normalized expression values	group 1 - 180518_SNK268_B_L005_APBZ-1-1_R1 trimmed-1 (GE)-1 - Unique gene reads	group 1 - 180518_SNK268_B_L005_APBZ-1-1_R1 trimmed-1 (GE)-1 - Total gene reads	group 1 - 180518_SNK268_B_L005_APBZ-1-1_R1 trimmed-1 (GE)-1 - RPKM	group 1 - 180518_SNK268_B_L005_APBZ-1-1_R1 trimmed-1 (GE)-1 - Chromosome region end	group 1 - 190517_SNK268_A_L001_APBZ-2-1 (GE) - Expression values	group 1 - 190517_SNK268_A_L001_APBZ-2-1 (GE) - Normalized expression values	group 1 - 190517_SNK268_A_L001_APBZ-2-1 (GE) - Unique gene reads	group 1 - 190517_SNK268_A_L001_APBZ-2-1 (GE) - Total gene reads	group 1 - 190517_SNK268_A_L001_APBZ-2-1 (GE) - RPKM	group 1 - 190517_SNK268_A_L001_APBZ-2-1 (GE) - Chromosome region end	group 1 - 210217_A00902_B_APBZ-3-1 (GE) - Expression values	group 1 - 210217_A00902_B_APBZ-3-1 (GE) - Normalized expression values	group 1 - 210217_A00902_B_APBZ-3-1 (GE) - Unique gene reads	group 1 - 210217_A00902_B_APBZ-3-1 (GE) - Total gene reads	group 1 - 210217_A00902_B_APBZ-3-1 (GE) - RPKM	group 1 - 210217_A00902_B_APBZ-3-1 (GE) - Chromosome region end	group 1 - Means	group 1 - Normalized means	group 2 - 180518_SNK268_B_L005_APBZ-1-2_R1 trimmed (GE)-1 - Expression values	group 2 - 180518_SNK268_B_L005_APBZ-1-2_R1 trimmed (GE)-1 - Normalized expression values	group 2 - 180518_SNK268_B_L005_APBZ-1-2_R1 trimmed (GE)-1 - Unique gene reads	group 2 - 180518_SNK268_B_L005_APBZ-1-2_R1 trimmed (GE)-1 - Total gene reads	group 2 - 180518_SNK268_B_L005_APBZ-1-2_R1 trimmed (GE)-1 - RPKM	group 2 - 180518_SNK268_B_L005_APBZ-1-2_R1 trimmed (GE)-1 - Chromosome region end	group 2 - 190517_SNK268_A_L001_APBZ-2-2 (GE) - Expression values	group 2 - 190517_SNK268_A_L001_APBZ-2-2 (GE) - Normalized expression values	group 2 - 190517_SNK268_A_L001_APBZ-2-2 (GE) - Unique gene reads	group 2 - 190517_SNK268_A_L001_APBZ-2-2 (GE) - Total gene reads	group 2 - 190517_SNK268_A_L001_APBZ-2-2 (GE) - RPKM	group 2 - 190517_SNK268_A_L001_APBZ-2-2 (GE) - Chromosome region end	group 2 - 210217_A00902_B_L002_APBZ-3-2 (GE)-1 - Expression values	group 2 - 210217_A00902_B_L002_APBZ-3-2 (GE)-1 - Normalized expression values	group 2 - 210217_A00902_B_L002_APBZ-3-2 (GE)-1 - Unique gene reads	group 2 - 210217_A00902_B_L002_APBZ-3-2 (GE)-1 - Total gene reads	group 2 - 210217_A00902_B_L002_APBZ-3-2 (GE)-1 - RPKM	group 2 - 210217_A00902_B_L002_APBZ-3-2 (GE)-1 - Chromosome region end	group 2 - Means	group 2 - Normalized means	group 3 - 180518_SNK268_B_L005_APBZ-1-3_R1 trimmed (GE)-1 - Expression values	group 3 - 180518_SNK268_B_L005_APBZ-1-3_R1 trimmed (GE)-1 - Normalized expression values	group 3 - 180518_SNK268_B_L005_APBZ-1-3_R1 trimmed (GE)-1 - Unique gene reads	group 3 - 180518_SNK268_B_L005_APBZ-1-3_R1 trimmed (GE)-1 - Total gene reads	group 3 - 180518_SNK268_B_L005_APBZ-1-3_R1 trimmed (GE)-1 - RPKM	group 3 - 180518_SNK268_B_L005_APBZ-1-3_R1 trimmed (GE)-1 - Chromosome region end	group 3 - 190517_SNK268_A_L001_APBZ-2-3 (GE) - Expression values	group 3 - 190517_SNK268_A_L001_APBZ-2-3 (GE) - Normalized expression values	group 3 - 190517_SNK268_A_L001_APBZ-2-3 (GE) - Unique gene reads
XM_019572844.1	3848	109.371	3690	3848	65.1795	1678	6831	85.5572	6778	6831	50.9876	1678	12120	100.112	11943	12120	59.6615	1678	7599.67	98.3468	5814	98.666	5561	5814	58.7998	1678	7350	88.7646	7247	7350	52.899	1678	12347	97.1991	12125	12347	57.9256	1678	8503.67	94.8766	5146	169.43	4954	5146	100.971	1678	14841	178.435	14680
XM_019575996.1	3522	100.105	3359	3522	59.3392	1687	9005	112.786	8892	9005	66.856	1687	14846	122.629	14591	14846	72.6906	1687	9124.33	111.84	6312	107.117	6005	6312	63.4957	1687	10175	122.882	10067	10175	72.8403	1687	15319	120.596	15064	15319	71.4852	1687	10602	116.865	2961	97.4895	2827	2961	57.7887	1687	9534	114.628	9428
XM_019593120.1	3978	113.066	3978	3978	80.4741	1405	10832	135.669	10832	10832	96.5616	1405	20688	170.884	20686	20688	121.626	1405	11832.7	139.873	7963	135.135	7961	7963	96.1818	1405	14569	175.947	14567	14569	125.229	1405	24377	191.903	24358	24377	136.586	1405	15636.3	167.662	1689	55.6095	1689	1689	39.5797	1405	4328	52.0359	4327
XM_019607867.1	344	9.77746	344	344	6.52266	1499	871	10.9091	871	871	7.27761	1499	1701	14.0504	1701	1701	9.37317	1499	972	11.579	680	11.5399	680	680	7.69839	1499	1036	12.5116	1035	1036	8.34662	1499	2087	16.4295	2086	2087	10.9603	1499	1267.67	13.4936	187	6.15689	187	187	4.10733	1499	516	6.20391	516
XM_019557615.1	2541	72.2225	2407	2541	20.9219	3452	5548	69.4878	5436	5548	20.1297	3452	9604	79.3297	9381	9604	22.9808	3452	5897.67	73.68	4204	71.3437	4016	4204	20.6673	3452	6552	79.1273	6437	6552	22.9222	3452	9632	75.8258	9462	9632	21.9658	3452	6796	75.4323	1337	44.0201	1283	1337	12.7521	3452	3755	45.1467	3703
XM_019593387.1	5516	156.78	463	5516	45.47	3448	13762	172.367	1634	13762	49.9904	3448	20778	171.628	2586	20778	49.776	3448	13352	166.925	8697	147.592	727	8697	42.805	3448	17805	215.028	2268	17805	62.363	3448	24462	192.572	3209	24462	55.8503	3448	16988	185.064	2543	83.7271	211	2543	24.2828	3448	8319	100.02	1000
XM_019598235.1	63	1.79064	62	63	0.549951	3256	158	1.97892	156	158	0.607778	3256	281	2.32108	279	281	0.712862	3256	167.333	2.03021	96	1.62916	90	96	0.500356	3256	158	1.90814	156	158	0.586037	3256	286	2.25147	282	286	0.691484	3256	180	1.92959	28	0.921887	28	28	0.283135	3256	108	1.29849	108
XM_019603200.1	1728	49.1147	1726	1728	15.3676	3196	5394	67.559	5390	5394	21.1386	3196	6957	57.4653	6950	6957	17.9804	3196	4693	58.0463	2754	46.7365	2750	2754	14.6234	3196	5421	65.4684	5421	5421	20.4845	3196	8530	67.1506	8526	8530	21.0108	3196	5568.33	59.7852	845	27.8212	844	845	8.70501	3196	2073	24.9238	2073
XM_019603990.1	973	27.6554	972	973	11.5568	2393	2234	27.9805	2234	2234	11.6926	2393	3483	28.7698	3483	3483	12.0225	2393	2230	28.1353	1480	25.1162	1476	1480	10.4957	2393	2654	32.0519	2654	2654	13.394	2393	4151	32.6778	4151	4151	13.6556	2393	2761.67	29.9486	928	30.554	927	928	12.7681	2393	2170	26.0901	2168
XM_019593502.1	3390	96.3535	3390	3390	42.5966	2262	5364	67.1832	5364	5364	29.7008	2262	8614	71.1523	8614	8614	31.4555	2262	5789.33	78.2297	4549	77.1985	4549	4549	34.1284	2262	6103	73.7048	6103	6103	32.5839	2262	11478	90.3581	11478	11478	39.9461	2262	7376.67	80.4204	2873	94.5922	2873	2873	41.8179	2262	9569	115.049	9569
XM_019590516.1	6857	194.896	6857	6857	123.822	1574	10682	133.79	10680	10682	85.0002	1574	14510	119.854	14508	14510	76.1459	1574	10683	149.513	9349	158.656	9348	9349	100.798	1574	12184	147.144	12184	12184	93.484	1574	17344	136.537	17344	17344	86.7452	1574	12959	147.446	12317	405.531	12317	12317	257.644	1574	32847	394.922	32844
XR_002105898.1	103	2.92755	31	103	1.51217	1936	58	0.726441	21	58	0.375228	1936	14	0.115641	7	14	0.0597319	1936	58.3333	1.25655	46	0.780639	9	46	0.403223	1936	51	0.615917	15	51	0.318139	1936	336	2.64509	183	336	1.36626	1936	144.333	1.34721	0	0	0	0	0	1936	21	0.252485	11
XM_019560030.1	1286	36.5518	182	1286	19.1974	1904	3915	49.0347	746	3915	25.7535	1904	6009	49.6348	1095	6009	26.0687	1904	3736.67	45.0738	2575	43.6988	413	2575	22.9511	1904	5570	67.2678	1121	5570	35.3297	1904	9238	72.7242	1617	9238	38.1955	1904	5794.33	61.2303	679	22.3558	119	679	11.7415	1904	1924	23.1324	306
XR_002105261.1	7845	222.977	384	7845	124.014	1798	11699	146.528	845	11699	81.495	1798	27484	227.02	1533	27484	126.262	1798	15676	198.842	8313	141.075	462	8313	78.4622	1798	7811	94.332	473	7811	52.4649	1798	36237	285.268	1987	36237	158.658	1798	17453.7	173.558	10528	346.629	517	10528	192.786	1798	31663	380.687	1617
XM_019597834.1	10535	299.435	10535	10535	167.189	1791	20335	254.693	20334	20335	142.207	1791	34085	281.545	34083	34085	157.2	1791	21651.7	278.557	16439	278.977	16438	16439	155.766	1791	29126	351.749	29126	29126	196.398	1791	40602	319.63	40595	40602	178.465	1791	28722.3	316.785	14477	476.648	14468	14477	266.135	1791	44426	534.137	44418
XM_019579828.1	1603	45.5618	116	1603	23.9673	1901	3420	42.8349	328	3420	22.5328	1901	5448	45.0009	598	5448	23.6722	1901	3490.33	44.4659	2754	46.7365	198	2754	24.5852	1901	4478	54.08	424	4478	28.4482	1901	7184	56.5545	760	7184	29.7499	1901	4805.33	52.457	1072	35.2951	46	1072	18.5666	1901	2304	27.7012	159
XM_019580178.1	1232	35.017	1232	1232	21.9267	1597	2987	37.4117	2987	2987	23.4262	1597	4735	39.1114	4735	4735	24.4906	1597	2984.67	37.18	2267	38.4719	2267	2267	24.0901	1597	3508	42.3655	3508	3508	26.5282	1597	5783	45.5254	5783	5783	28.5068	1597	3852.67	42.1209	937	30.8503	937	937	19.3176	1597	2331	28.0258	2331
XM_019597691.1	745	21.175	731	745	11.0287	1920	2646	33.1407	2616	2646	17.2608	1920	3559	29.3976	3533	3559	15.3112	1920	2316.67	27.9044	1945	33.0075	1917	1945	17.1914	1920	3699	44.6721	3678	3699	23.2667	1920	4236	33.347	4206	4236	17.3682	1920	3293.33	37.0089	321	10.5688	309	321	5.50457	1920	880	10.5803	876
XM_019582541.1	862	24.5005	862	862	21.2863	1151	1959	24.5362	1959	1959	21.3173	1151	2829	23.3677	2829	2829	20.3021	1151	1883.33	24.1348	1374	23.3174	1374	1374	20.2584	1151	2402	29.0085	2402	2402	25.2029	1151	3325	26.1753	3325	3325	22.7414	1151	2367	26.1671	649	21.368	649	649	18.5647	1151	2023	24.3227	2023
XM_019588727.1	521	14.8083	481	521	10.9125	1357	2065	25.8638	2017	2065	19.0595	1357	3466	28.6294	3399	3466	21.0976	1357	2017.33	23.1005	1147	19.4651	1082	1147	14.3442	1357	3179	38.3922	3116	3179	28.292	1357	4586	36.1023	4510	4586	26.6045	1357	2970.67	31.3199	223	7.34217	210	223	5.41059	1357	509	6.11975	497
XM_019570389.1	4265	121.223	3988	4265	89.9284	1348	15327	191.968	15106	15327	142.41	1348	25295	208.939	24839	25295	154.999	1348	14962.3	174.043	9876	167.6	9281	9876	124.332	1348	23654	285.665	23327	23654	211.918	1348	40088	315.584	39527	40088	234.113	1348	24539.3	256.283	1517	49.9465	1413	1517	37.0523	1348	4458	53.5989	4393
XM_019600468.1	25303	719.184	25213	25303	509.698	1411	64513	808.015	64169	64513	572.654	1411	101547	838.786	101019	101547	594.462	1411	63787.7	788.661	48706	826.561	48563	48706	585.798	1411	73835	891.691	73545	73835	631.957	1411	120939	952.066	120470	120939	674.746	1411	81160	890.106	14021	461.635	13981	14021	327.169	1411	41121	494.401	40962
XM_019597559.1	2593	73.7005	2574	2593	41.6152	1771	6858	85.8953	6823	6858	48.501	1771	11863	97.9892	11760	11863	55.3299	1771	7104.67	85.8617	5029	85.3443	4986	5029	48.1899	1771	10159	122.688	10076	10159	69.2763	1771	12972	102.119	12826	12972	57.6619	1771	9386.67	103.384	2392	78.7555	2374	2392	44.4695	1771	5978	71.874	5937
XM_019576948.1	3217	91.4363	3217	3217	44.6685	2047	8155	102.14	8155	8155	49.8974	2047	15641	129.196	15641	15641	63.1147	2047	9004.33	107.591	6444	109.357	6444	6444	53.4233	2047	11948	144.294	11948	11948	70.4904	2047	25434	200.224	25434	25434	97.8132	2047	14608.7	151.292	2478	81.587	2478	2478	39.8569	2047	6963	83.7167	6963
XM_019579441.1	28317	804.85	28012	28317	578.613	1391	62818	786.785	62139	62818	565.626	1391	100063	826.528	98509	100063	594.197	1391	63732.7	806.054	59653	1012.34	58870	59653	727.776	1391	72021	869.784	71160	72021	625.294	1391	130858	1030.15	128870	130858	740.583	1391	87510.7	970.757	13143	432.727	12893	13143	311.091	1391	33161	398.697	32793
XM_019559913.1	33893	963.336	33525	33893	712.527	1352	94181	1179.6	93283	94181	872.486	1352	171722	1418.44	170639	171722	1049.14	1352	99932	1187.12	70587	1197.89	69669	70587	886.014	1352	132873	1604.68	132017	132873	1186.9	1352	195581	1539.67	193629	195581	1138.81	1352	133014	1447.41	13922	458.375	13699	13922	339.035	1352	39175	471.004	38760
XM_019578482.1	13834	393.202	13676	13834	286.799	1371	45651	571.771	44840	45651	417.047	1371	76474	631.681	75179	76474	460.745	1371	45319.7	532.218	31824	540.067	31442	31824	393.922	1371	67720	817.842	66675	67720	596.529	1371	108549	854.528	106607	108549	623.288	1371	69364.3	737.479	5282	173.907	5205	5282	126.847	1371	16825	202.288	16522
XM_019568724.1	1300	36.9497	1271	1300	19.4064	1904	3255	40.7683	3248	3255	21.4119	1904	4962	40.9865	4918	4962	21.5265	1904	3172.33	39.5682	2800	47.5172	2772	2800	24.9565	1904	3530	42.6311	3520	3530	22.3903	1904	5328	41.9435	5306	5328	22.0292	1904	3886	44.0306	753	24.7922	735	753	13.0211	1904	1964	23.6133	1954
XM_019576009.1	894	25.41	889	894	12.8658	1975	2930	36.6978	2927	2930	18.5812	1975	3399	28.076	3386	3399	14.2157	1975	2407.67	30.0613	1910	32.4135	1907	1910	16.4119	1975	3410	41.1819	3400	3410	20.8516	1975	3626	28.5449	3614	3626	14.4531	1975	2982	34.0468	440	14.4868	439	440	7.33508	1975	1297	15.5939	1296
XM_019566801.1	435	12.3639	419	435	6.55217	1887	829	10.3831	815	829	5.50243	1887	1679	13.8687	1659	1679	7.34958	1887	981	12.2052	840	14.2552	824	840	7.5544	1887	1893	22.8614	1881	1893	12.1152	1887	2052	16.1539	2030	2052	8.56064	1887	1595	17.7568	312	10.2725	305	312	5.4438	1887	1029	12.3718	1029
XM_019601473.1	7912	224.882	293	7912	152.981	1470	19566	245.061	661	19566	166.708	1470	30591	252.684	1095	30591	171.894	1470	19356.3	240.875	14402	244.408	445	14402	166.264	1470	23334	281.8	698	23334	191.701	1470	37001	291.282	1346	37001	198.151	1470	24912.3	272.497	4687	154.317	158	4687	104.978	1470	15520	186.598	496
XM_019569101.1	922	26.2059	922	922	16.4094	1597	2368	29.6588	2368	2368	18.5716	1597	4111	33.9572	4109	4111	21.2631	1597	2467	29.9406	1682	28.5443	1682	1682	17.8737	1597	2989	36.0976	2989	2989	22.6034	1597	3946	31.064	3946	3946	19.4515	1597	2872.33	31.902	617	20.3144	617	617	12.7204	1597	1753	21.0765	1753
XM_019571439.1	59	1.67695	52	59	0.840155	1996	16	0.200397	16	16	0.100399	1996	37	0.305623	37	37	0.153118	1996	37.3333	0.727656	79	1.34066	79	79	0.671675	1996	10	0.120768	10	10	0.0605051	1996	17	0.133829	15	17	0.0670485	1996	35.3333	0.531753	34	1.11943	33	34	0.560839	1996	7	0.0841616	7
XM_019577070.1	1561	44.3681	211	1561	27.6954	1602	6223	77.9421	582	6223	48.653	1602	9990	82.5181	901	9990	51.5094	1602	5924.67	68.2761	3636	61.7045	385	3636	38.5171	1602	7473	90.25	616	7473	56.3358	1602	11025	86.7919	1015	11025	54.1772	1602	7378	79.5821	745	24.5288	111	745	15.3113	1602	3119	37.5	284
XM_019596086.1	6744	191.684	304	6744	91.9788	2084	7992	100.098	577	7992	48.0319	2084	12786	105.613	941	12786	50.6782	2084	9174	132.465	5944	100.872	279	5944	48.4032	2084	842	10.1687	82	842	4.8794	2084	11565	91.043	952	11565	43.6866	2084	6117	67.3613	1717	56.5314	54	1717	27.1264	2084	14108	169.622	845
XM_019564578.1	1783	50.678	1746	1783	35.0955	1444	4243	53.1429	4232	4243	36.8026	1444	6919	57.1514	6886	6919	39.5786	1444	4315	53.6574	2144	36.3846	2101	2144	25.1971	1444	3732	45.0707	3718	3732	31.2124	1444	5529	43.5259	5506	5529	30.1426	1444	3801.67	41.6604	2855	93.9995	2779	2855	65.0966	1444	9719	116.852	9709
XM_019566645.1	1210	34.3917	1196	1210	22.2456	1546	1786	22.3694	1780	1786	14.4692	1546	3803	31.4131	3795	3803	20.3189	1546	2266.33	29.3914	1666	28.2727	1639	1666	18.2877	1546	1941	23.4411	1939	1941	15.1624	1546	2667	20.9954	2659	2667	13.5805	1546	2091.33	24.2364	1325	43.625	1321	1325	28.218	1546	3153	37.9088	3150
XM_019570213.1	386	10.9712	39	386	7.66682	1431	1648	20.6409	110	1648	14.4241	1431	2846	23.5082	188	2846	16.4278	1431	1626.67	18.3734	740	12.5581	54	740	8.77576	1431	1753	21.1707	106	1753	14.7943	1431	2141	16.8546	146	2141	11.7782	1431	1544.67	16.8611	545	17.9439	61	545	12.5394	1431	3730	44.8461	188
XM_019585728.1	1186	33.7095	15	1186	14.9687	2252	3238	40.5554	204	3238	18.0086	2252	3918	32.363	215	3918	14.3708	2252	2780.67	35.5426	2008	34.0766	28	2008	15.1317	2252	1932	23.3324	125	1932	10.3607	2252	5698	44.8563	442	5698	19.9184	2252	3212.67	34.0884	956	31.4758	12	956	13.9768	2252	2012	24.1904	190
XM_019557314.1	4076	115.852	4076	4076	49.6791	2332	9386	117.558	9384	9386	50.4109	2332	13454	111.131	13452	13454	47.6548	2332	8972	114.847	7643	129.705	7643	7643	55.6196	2332	5694	68.7654	5694	5694	29.4877	2332	13131	103.371	13131	13131	44.3272	2332	8822.67	100.614	2021	66.5405	2021	2021	28.5337	2332	4336	52.1321	4336
XM_019565421.1	7349	208.88	7333	7349	87.8753	2377	16050	201.024	16030	16050	84.5703	2377	23118	190.956	23078	23118	80.335	2377	15505.7	200.287	11523	195.55	11510	11523	82.2676	2377	19417	234.495	19388	19417	98.6519	2377	30287	238.428	30250	30287	100.306	2377	20409	222.824	5495	180.92	5488	5495	76.1129	2377	14702	176.763	14698
XM_019589083.1	213	6.05407	212	213	3.06846	1973	456	5.71133	456	456	2.89474	1973	522	4.31176	522	522	2.18538	1973	397	5.35905	263	4.46322	263	263	2.26215	1973	495	5.97802	495	495	3.02991	1973	659	5.18783	659	659	2.62941	1973	472.333	5.20969	120	3.95094	120	120	2.00251	1973	335	4.02773	335
XM_019566816.1	2548	72.4214	2543	2548	31.515	2298	3513	43.9998	3513	3513	19.147	2298	5406	44.6539	5400	5406	19.4317	2298	3822.33	53.6917	3046	51.6919	3046	3046	22.4943	2298	4293	51.8458	4285	4293	22.5613	2298	5959	46.9109	5948	5959	20.4138	2298	4432.67	50.1495	1862	61.3055	1861	1862	26.6778	2298	5721	68.7841	5715
XM_019605924.1	3062	87.0308	130	3062	35.7269	2436	6813	85.3317	595	6813	35.0294	2436	11410	94.2474	939	11410	38.6894	2436	7095	88.87	5305	90.0281	284	5305	36.9573	2436	9001	108.703	784	9001	44.6237	2436	15188	119.564	1139	15188	49.0822	2436	9831.33	106.099	2491	82.015	96	2491	33.6679	2436	6274	75.4328	477
XM_019571236.1	77	2.18856	76	77	1.37905	1587	108	1.35268	108	108	0.852352	1587	299	2.46976	299	299	1.55625	1587	161.333	2.00367	125	2.1213	125	125	1.33667	1587	97	1.17145	97	97	0.738154	1587	200	1.57446	200	200	0.992096	1587	140.667	1.6224	66	2.17302	65	66	1.36926	1587	181	2.17618	181
XM_019607159.1	224	6.36672	45	224	4.75839	1338	819	10.2578	166	819	7.66655	1338	718	5.93073	174	718	4.43253	1338	587	7.51843	324	5.49842	72	324	4.10943	1338	818	9.87883	183	818	7.38328	1338	723	5.69166	161	723	4.25386	1338	621.667	7.02297	141	4.64236	27	141	3.46963	1338	318	3.82334	54
XR_002105784.1	280	7.9584	1	280	6.01997	1322	612	7.6652	3	612	5.79818	1322	1088	8.98696	5	1088	6.798	1322	660	8.20352	0	0	0	0	0	1322	501	6.05048	0	501	4.57676	1322	1482	11.6667	4	1482	8.82506	1322	661	5.90574	1220	40.1679	0	1220	30.3842	1322	1908	22.94	2
XM_019607520.1	7642	217.207	7642	7642	121.345	1790	5714	71.5669	5714	5714	39.9815	1790	21946	181.276	21946	21946	101.271	1790	11767.3	156.683	8767	148.78	8767	8767	83.1171	1790	1160	14.0091	1160	1160	7.82631	1790	21896	172.372	21896	21896	96.2969	1790	10607.7	111.72	3254	107.136	3254	3254	59.8527	1790	17039	204.861	17039
XM_019562395.1	601	17.0821	584	601	11.2531	1518	1280	16.0318	1260	1280	10.5611	1518	1852	15.2977	1816	1852	10.0775	1518	1244.33	16.1372	1018	17.2759	966	1018	11.3807	1518	1633	19.7214	1612	1633	12.9917	1518	2730	21.4913	2689	2730	14.1577	1518	1793.67	19.4962	1107	36.4475	1075	1107	24.0102	1518	3512	42.2251	3478
XM_019577900.1	992	28.1955	22	992	11.3829	2477	5147	64.4653	166	5147	26.0256	2477	8273	68.3356	207	8273	27.588	2477	4804	53.6655	2356	39.9823	70	2356	16.1414	2477	6361	76.8206	152	6361	31.0136	2477	11098	87.3666	299	11098	35.2711	2477	6605	68.0565	1242	40.8923	26	1242	16.5088	2477	9446	113.57	224
XM_019562376.1	283	8.04367	283	283	3.84129	2094	413	5.17276	413	413	2.47028	2094	1427	11.7871	1427	1427	5.629	2094	707.667	8.33452	530	8.99432	530	530	4.29528	2094	2320	28.0182	2320	2320	13.3802	2094	1966	15.4769	1966	1966	7.39107	2094	1605.33	17.4965	2087	68.7135	2087	2087	32.8145	2094	6186	74.3748	6186
XM_019564823.1	228	6.48041	228	228	2.81757	2300	369	4.62166	369	369	2.00942	2300	1796	14.8351	1792	1796	6.45004	2300	797.667	8.64572	371	6.29603	371	371	2.7374	2300	299	3.61097	299	299	1.56999	2300	1316	10.3599	1316	1316	4.50432	2300	662	6.75564	783	25.7799	783	783	11.2087	2300	1724	20.7278	1724
XM_019589784.1	8060	229.088	394	8060	106.207	2157	14532	182.011	983	14532	84.3815	2157	83923	693.21	6098	83923	321.377	2157	35505	368.103	14823	251.553	766	14823	116.622	2157	8611	103.993	611	8611	48.2121	2157	63986	503.716	5041	63986	233.526	2157	29140	286.421	39477	1299.76	1854	39477	602.578	2157	82582	992.89	5780
XM_019588164.1	10260	291.619	10238	10260	184.803	1578	28868	361.567	28791	28868	229.13	1578	45361	374.685	45069	45361	237.443	1578	28163	342.624	21311	361.657	21267	21311	229.187	1578	38130	460.489	38026	38130	291.818	1578	55119	433.912	54951	55119	274.976	1578	38186.7	418.686	4732	155.799	4725	4732	98.7319	1578	14585	175.357	14558
XM_019570609.1	921	26.1775	919	921	20.6122	1270	2563	32.1012	2549	2563	25.2765	1270	4251	35.1136	4217	4251	27.6485	1270	2578.33	31.1307	1885	31.9892	1883	1885	25.1884	1270	3164	38.211	3149	3164	30.0874	1270	5978	47.0605	5957	5978	37.0555	1270	3675.67	39.0869	300	9.87736	300	300	7.77745	1270	885	10.6404	884
XM_019588160.1	5085	144.53	5085	5085	82.4944	1752	13224	165.628	13223	13224	94.5368	1752	24012	198.341	24012	24012	113.208	1752	14107	169.5	9454	160.438	9454	9454	91.5744	1752	12100	146.129	12100	12100	83.4072	1752	21372	168.246	21372	21372	96.0311	1752	14308.7	158.271	3375	111.12	3375	3375	63.4248	1752	8278	99.5271	8278
XM_019600187.1	5498	156.269	5470	5498	99.7249	1567	13375	167.52	13359	13375	106.905	1567	23903	197.44	23853	23903	125.999	1567	14258.7	173.743	11373	193.005	11339	11373	123.168	1567	17072	206.175	17058	17072	131.573	1567	34507	271.649	34405	34507	173.356	1567	20984	223.61	1552	51.0989	1551	1552	32.6094	1567	4394	52.8294	4386
XM_019562099.1	148	4.20658	26	148	3.6077	1166	297	3.71988	42	297	3.19029	1166	669	5.52599	122	669	4.73927	1166	371.333	4.48415	116	1.96857	19	116	1.68831	1166	275	3.32112	50	275	2.8483	1166	617	4.8572	117	617	4.16569	1166	336	3.3823	72	2.37057	13	72	2.03308	1166	267	3.21016	41
XM_019607842.1	1707	48.5178	1707	1707	46.0758	1053	3823	47.8825	3823	3823	45.4724	1053	5757	47.5532	5757	5757	45.1598	1053	3762.33	47.9845	2234	37.9119	2234	2234	36.0037	1053	4348	52.51	4348	4348	49.867	1053	5644	44.4312	5644	5644	42.1948	1053	4075.33	44.951	1386	45.6334	1386	1386	43.3366	1053	4802	57.7348	4802
XM_019560124.1	442	12.5629	442	442	7.22421	1739	981	12.2869	981	981	7.06548	1739	1649	13.6209	1649	1649	7.83258	1739	1024	12.8235	791	13.4236	791	791	7.71915	1739	1121	13.5381	1121	1121	7.78499	1739	1366	10.7535	1366	1366	6.18375	1739	1092.67	12.5717	541	17.8122	541	541	10.2428	1739	1300	15.63	1300
XM_019586384.1	660	18.7591	660	660	9.38424	1999	1365	17.0964	1365	1365	8.55248	1999	1923	15.8841	1923	1923	7.94603	1999	1316	17.2465	1143	19.3972	1143	1143	9.70345	1999	1542	18.6224	1542	1542	9.31588	1999	2220	17.4765	2220	2220	8.74261	1999	1635	18.4987	582	19.1621	582	582	9.58583	1999	1481	17.8062	1481
XM_019557617.1	359	10.2038	44	359	12.1764	838	992	12.4246	198	992	14.8265	838	1563	12.9105	290	1563	15.4063	838	971.333	11.8463	562	9.53738	71	562	11.3811	838	1374	16.5935	299	1374	19.8014	838	1869	14.7133	398	1869	17.5576	838	1268.33	13.6147	194	6.38736	35	194	7.62215	838	638	7.67073	136
XM_019587595.1	1104	31.3788	1065	1104	30.5242	1028	2911	36.4598	2873	2911	35.4667	1028	4332	35.7826	4212	4332	34.808	1028	2782.33	34.5404	2026	34.3821	1971	2026	33.4456	1028	4090	49.3942	4059	4090	48.0488	1028	5552	43.7069	5460	5552	42.5165	1028	3889.33	42.4944	777	25.5824	753	777	24.8856	1028	2430	29.2161	2410
XM_019603381.1	660	18.7591	15	660	17.7307	1058	1003	12.5624	37	1003	11.8737	1058	1496	12.3571	84	1496	11.6796	1058	1053	14.5595	1137	19.2954	31	1137	18.2376	1058	1321	15.9535	60	1321	15.0789	1058	1681	13.2333	76	1681	12.5079	1058	1379.67	16.1607	426	14.0258	12	426	13.2569	1058	731	8.78887	33
XM_019579303.1	698	19.8392	136	698	23.0153	862	2479	31.0491	937	2479	36.0198	862	3216	26.5644	1158	3216	30.8172	862	2131	25.8175	1320	22.401	303	1320	25.9872	862	2801	33.8272	1142	2801	39.2426	862	4167	32.8038	1740	4167	38.0555	862	2762.67	29.6773	394	12.9723	105	394	15.049	862	901	10.8328	334
XM_019590306.1	1811	51.4738	317	1811	60.1329	856	5275	66.0685	1877	5275	77.1828	856	7658	63.2556	2812	7658	73.8968	856	4914.67	60.266	3450	58.548	573	3450	68.3971	856	6795	82.0619	2688	6795	95.8667	856	8789	69.1895	3497	8789	80.8289	856	6344.67	69.9331	1139	37.501	199	1139	43.8096	856	3822	45.9522	1576
XM_019576148.1	385	10.9428	11	385	15.9516	686	1132	14.1781	92	1132	20.6678	686	1725	14.2486	136	1725	20.7706	686	1080.67	13.1232	687	11.6587	18	687	16.9952	686	1259	15.2047	69	1259	22.1643	686	1888	14.8629	171	1888	21.666	686	1278	13.9088	206	6.78245	5	206	9.88696	686	492	5.91536	31
XM_019583143.1	2271	64.5483	2271	2271	43.1473	1496	3702	46.3669	3702	3702	30.9939	1496	7150	59.0595	7148	7150	39.4783	1496	4374.33	56.6583	3341	56.6982	3341	3341	37.8999	1496	1779	21.4846	1778	1779	14.3614	1496	5736	45.1554	5735	5736	30.1841	1496	3618.67	41.1127	1462	48.1357	1462	1462	32.1762	1496	2361	28.3865	2358
XM_019588469.1	2323	66.0263	2323	2323	20.3095	3251	3104	38.8771	3104	3104	11.9585	3251	5524	45.6286	5524	5524	14.0353	3251	3650.33	50.1773	2958	50.1985	2958	2958	15.4409	3251	3780	45.6503	3780	3780	14.0419	3251	4353	34.268	4353	4353	10.5408	3251	3697	43.3723	7971	262.441	7971	7971	80.7264	3251	21577	259.422	21577
XM_019580676.1	2000	56.8457	1900	2000	56.4506	1007	5110	64.0019	5091	5110	63.557	1007	7446	61.5045	7392	7446	61.077	1007	4852	60.784	3514	59.6341	3333	3514	59.2195	1007	5287	63.8501	5270	5287	63.4063	1007	9493	74.7316	9456	9493	74.2121	1007	6098	66.0719	728	23.9691	696	728	23.8024	1007	1912	22.9881	1908
XM_019592410.1	10487	298.071	10022	10487	269.017	1108	33921	424.855	33771	33921	383.443	1108	46735	386.034	46489	46735	348.407	1108	30381	369.653	26086	442.69	24941	26086	399.54	1108	37633	454.487	37526	37633	410.187	1108	57527	452.869	57337	57527	408.726	1108	40415.3	450.015	4286	141.115	4118	4286	127.36	1108	12471	149.94	12424
XM_019609589.1	381	10.8291	378	381	12.2779	882	870	10.8966	868	870	12.3544	882	1448	11.9606	1445	1448	13.5608	882	899.667	11.2288	578	9.8089	575	578	11.1212	882	904	10.9174	904	904	12.378	882	2080	16.3743	2076	2080	18.565	882	1187.33	12.3669	308	10.1408	308	308	11.4975	882	758	9.1135	758
[truncated: 33 more columns]
