# Supplementary material for: Sugar Starvation Disrupts Lipid Breakdown by Inducing Autophagy in Embryonic Axes of Lupin (Lupinus spp.) Germinating Seeds
Source: Int J Mol Sci. 2023 Jul 21;24(14):11773. doi: 10.3390/ijms241411773 (PMC10380618; doi:10.3390/ijms241411773)
Supplement: Supplementary file 1 [file ijms-24-11773-s001.zip › Table S4.xlsx]

## Sheet: White lupin (A)
	Table S4. Transcriptomics data related to pexophagy (autophagic degradation of peroxisome) in white lupin (A) and Andean lupin (B) embryonic axes. The axes were isolated from imbibed seeds and cultured in vitro for 96 h on a medium with (+S) and without (-S) 60 mM sucrose. Culture media were also enriched with 35 mM asparagine (+Asn). Data were obtained from three independent in vitro cultures an…
	+S																				+S+Asn																				-S
	Sequencing 1						Sequencing 2						Sequencing 3						Means	Normalized means	Sequencing 1						Sequencing 2						Sequencing 3						Means	Normalized means	Sequencing 1						Sequencing 2
Feature ID	group 5 - 180518_SNK268_B_L005_APBZ-1-5_R1 trimmed (GE)-1 - Expression values	group 5 - 180518_SNK268_B_L005_APBZ-1-5_R1 trimmed (GE)-1 - Normalized expression values	group 5 - 180518_SNK268_B_L005_APBZ-1-5_R1 trimmed (GE)-1 - Unique gene reads	group 5 - 180518_SNK268_B_L005_APBZ-1-5_R1 trimmed (GE)-1 - Total gene reads	group 5 - 180518_SNK268_B_L005_APBZ-1-5_R1 trimmed (GE)-1 - RPKM	group 5 - 180518_SNK268_B_L005_APBZ-1-5_R1 trimmed (GE)-1 - Chromosome region end	group 5 - 190517_SNK268_A_L001_APBZ-2-5 (GE) - Expression values	group 5 - 190517_SNK268_A_L001_APBZ-2-5 (GE) - Normalized expression values	group 5 - 190517_SNK268_A_L001_APBZ-2-5 (GE) - Unique gene reads	group 5 - 190517_SNK268_A_L001_APBZ-2-5 (GE) - Total gene reads	group 5 - 190517_SNK268_A_L001_APBZ-2-5 (GE) - RPKM	group 5 - 190517_SNK268_A_L001_APBZ-2-5 (GE) - Chromosome region end	group 5 - 210217_A00902_B_L002_APBZ-3-5 (GE) - Expression values	group 5 - 210217_A00902_B_L002_APBZ-3-5 (GE) - Normalized expression values	group 5 - 210217_A00902_B_L002_APBZ-3-5 (GE) - Unique gene reads	group 5 - 210217_A00902_B_L002_APBZ-3-5 (GE) - Total gene reads	group 5 - 210217_A00902_B_L002_APBZ-3-5 (GE) - RPKM	group 5 - 210217_A00902_B_L002_APBZ-3-5 (GE) - Chromosome region end	group 5 - Means	group 5 - Normalized means	group 6 - 180518_SNK268_B_L005_APBZ-1-6_R1 trimmed (GE)-1 - Expression values	group 6 - 180518_SNK268_B_L005_APBZ-1-6_R1 trimmed (GE)-1 - Normalized expression values	group 6 - 180518_SNK268_B_L005_APBZ-1-6_R1 trimmed (GE)-1 - Unique gene reads	group 6 - 180518_SNK268_B_L005_APBZ-1-6_R1 trimmed (GE)-1 - Total gene reads	group 6 - 180518_SNK268_B_L005_APBZ-1-6_R1 trimmed (GE)-1 - RPKM	group 6 - 180518_SNK268_B_L005_APBZ-1-6_R1 trimmed (GE)-1 - Chromosome region end	group 6 - 190517_SNK268_A_L001_APBZ-2-6 (GE) - Expression values	group 6 - 190517_SNK268_A_L001_APBZ-2-6 (GE) - Normalized expression values	group 6 - 190517_SNK268_A_L001_APBZ-2-6 (GE) - Unique gene reads	group 6 - 190517_SNK268_A_L001_APBZ-2-6 (GE) - Total gene reads	group 6 - 190517_SNK268_A_L001_APBZ-2-6 (GE) - RPKM	group 6 - 190517_SNK268_A_L001_APBZ-2-6 (GE) - Chromosome region end	group 6 - 210217_A00902_B_L002_APBZ-3-6 (GE) - Expression values	group 6 - 210217_A00902_B_L002_APBZ-3-6 (GE) - Normalized expression values	group 6 - 210217_A00902_B_L002_APBZ-3-6 (GE) - Unique gene reads	group 6 - 210217_A00902_B_L002_APBZ-3-6 (GE) - Total gene reads	group 6 - 210217_A00902_B_L002_APBZ-3-6 (GE) - RPKM	group 6 - 210217_A00902_B_L002_APBZ-3-6 (GE) - Chromosome region end	group 6 - Means	group 6 - Normalized means	group 7 - 180518_SNK268_B_L005_APBZ-1-7_R1 trimmed (GE)-1 - Expression values	group 7 - 180518_SNK268_B_L005_APBZ-1-7_R1 trimmed (GE)-1 - Normalized expression values	group 7 - 180518_SNK268_B_L005_APBZ-1-7_R1 trimmed (GE)-1 - Unique gene reads	group 7 - 180518_SNK268_B_L005_APBZ-1-7_R1 trimmed (GE)-1 - Total gene reads	group 7 - 180518_SNK268_B_L005_APBZ-1-7_R1 trimmed (GE)-1 - RPKM	group 7 - 180518_SNK268_B_L005_APBZ-1-7_R1 trimmed (GE)-1 - Chromosome region end	group 7 - 190517_SNK268_A_L001_APBZ-2-7 (GE) - Expression values	group 7 - 190517_SNK268_A_L001_APBZ-2-7 (GE) - Normalized expression values	group 7 - 190517_SNK268_A_L001_APBZ-2-7 (GE) - Unique gene reads
XM_019559989.1	2527	60.8138	177	2527	44.5849	1364	5961	69.5266	695	5961	50.9726	1364	8736	64.1871	1047	8736	47.058	1364	5741.33	64.8425	4123	59.3741	298	4123	43.5294	1364	4367	60.8892	499	4367	44.6402	1364	8671	66.972	1033	8671	49.0997	1364	5720.33	62.4118	1179	84.8298	84	1179	62.1919	1364	6844	83.1279	691
XM_019590565.1	321	7.72506	0	321	5.66353	1364	1335	15.5709	0	1335	11.4156	1364	1988	14.6067	2	1988	10.7087	1364	1214.67	12.6342	600	8.64043	0	600	6.33462	1364	979	13.6502	6	979	10.0075	1364	1533	11.8404	2	1533	8.68065	1364	1037.33	11.377	177	12.7353	0	177	9.3367	1364	1147	13.9316	0
XM_019598167.1	1808	43.5106	95	1808	9.6156	4525	3340	38.9564	250	3340	8.60914	4525	5437	39.948	312	5437	8.82828	4525	3528.33	40.805	2956	42.5685	158	2956	9.4074	4525	2295	31.9993	150	2295	7.07166	4525	4201	32.4472	242	4201	7.17065	4525	3150.67	35.6716	699	50.2935	44	699	11.1146	4525	3444	41.8312	196
XM_019586245.1	594	14.295	0	594	3.81097	3751	1569	18.3002	2	1569	4.87874	3751	1289	9.47083	0	1289	2.52488	3751	1150.67	14.022	1481	21.3275	0	1481	5.6858	3751	822	11.4612	0	822	3.0555	3751	1230	9.50013	0	1230	2.53269	3751	1177.67	14.0962	96	6.90726	0	96	1.84144	3751	1623	19.7131	0
XM_019570378.1	1615	38.8659	5	1615	65.763	591	2075	24.2019	37	2075	40.9508	591	2655	19.5074	42	2655	33.0075	591	2115	27.5251	3263	46.9895	9	3263	79.5085	591	1586	22.1136	22	1586	37.4173	591	1925	14.8681	46	1925	25.1575	591	2258	27.9904	1688	121.453	4	1688	205.504	591	4937	59.9653	130
XM_019570379.1	383	9.21712	0	383	11.0916	831	3143	36.6586	0	3143	44.1139	831	4833	35.5101	0	4833	42.7318	831	2786.33	27.1286	725	10.4405	0	725	12.5638	831	1987	27.7048	0	1987	33.3391	831	4712	36.394	0	4712	43.7954	831	2474.67	24.8464	307	22.0888	0	307	26.581	831	8499	103.23	0
XM_019584286.1	162	3.89863	157	162	5.46792	713	315	3.67403	314	315	5.15291	713	491	3.60759	483	491	5.05973	713	322.667	3.72675	246	3.54257	234	246	4.96855	713	215	2.99775	215	215	4.20442	713	437	3.37525	433	437	4.73387	713	299.333	3.30519	73	5.2524	70	73	7.36661	713	324	3.93534	322
XM_019595033.1	1090	26.2315	237	1090	38.1827	687	2478	28.9023	820	2478	42.0704	687	3547	26.0613	1214	3547	37.935	687	2371.67	27.0651	1711	24.6396	371	1711	35.8655	687	1499	20.9006	546	1499	30.423	687	2761	21.3251	909	2761	31.0409	687	1990.33	22.2884	468	33.6729	114	468	49.0144	687	2581	31.3491	1109
XM_019601712.1	189	4.5484	13	189	8.16588	557	67	0.78146	11	67	1.40298	557	167	1.22702	26	167	2.20291	557	141	2.18563	165	2.37612	14	165	4.26592	557	55	0.766867	6	55	1.37678	557	42	0.324395	6	42	0.582396	557	87.3333	1.15579	22	1.58291	0	22	2.84186	557	37	0.449406	6
XM_019591170.1	2837	68.2741	2837	2837	101.902	670	6660	77.6794	6660	6660	115.939	670	10202	74.9585	10202	10202	111.878	670	6566.33	73.6373	3877	55.8315	3877	3877	83.3307	670	3749	52.2724	3749	3749	78.0185	670	7761	59.9435	7761	7761	89.4679	670	5129	56.0158	919	66.1226	919	919	98.6905	670	6713	81.5368	6713
XM_019573451.1	2523	60.7175	2523	2523	104.326	582	5540	64.6162	5540	5540	111.024	582	8904	65.4215	8904	8904	112.408	582	5655.67	63.5851	3982	57.3436	3982	3982	98.5286	582	3449	48.0895	3449	3449	82.628	582	6651	51.3702	6651	6651	88.2649	582	4694	52.2678	1335	96.0541	1335	1335	165.041	582	8186	99.428	8186
XM_019559290.1	10646	256.202	659	10646	140.001	1830	33574	391.593	2197	33574	213.985	1830	57991	426.085	3739	57991	232.833	1830	34070.3	357.96	19044	274.247	1203	19044	149.862	1830	24564	342.497	1684	24564	187.157	1830	78666	607.591	5303	78666	332.017	1830	40758	408.112	5979	430.193	405	5979	235.078	1830	47216	573.491	2969
XM_019582491.1	241	5.79981	241	241	5.35532	1083	933	10.8821	933	933	10.0481	1083	2018	14.8271	2014	2018	13.6908	1083	1064	10.503	493	7.09955	491	493	6.55545	1083	648	9.03508	648	648	8.34264	1083	2438	18.8303	2438	2438	17.3872	1083	1193	11.655	109	7.84262	108	109	7.24157	1083	807	9.80191	807
XM_019590461.1	3515	84.5906	152	3515	26.7522	3162	5807	67.7304	352	5807	21.4201	3162	9333	68.5735	564	9333	21.6868	3162	6218.33	73.6315	5075	73.0836	208	5075	23.1131	3162	4250	59.2579	248	4250	18.7406	3162	7784	60.1211	549	7784	19.0136	3162	5703	64.1542	1060	76.2677	41	1060	24.1201	3162	5685	69.0506	336
XM_019608568.1	1935	46.5669	0	1935	24.7565	1881	4239	49.4419	26	4239	26.2849	1881	6872	50.4915	46	6872	26.8429	1881	4348.67	48.8335	3231	46.5287	0	3231	24.7361	1881	2789	38.8871	18	2789	20.6736	1881	6232	48.134	46	6232	25.5896	1881	4084	44.5166	662	47.6313	0	662	25.3223	1881	4015	48.7666	22
XM_019575129.1	356	8.56735	356	356	6.52502	1313	936	10.9171	935	936	8.31463	1313	1231	9.04468	1231	1231	6.88856	1313	841	9.50971	683	9.83568	683	683	7.491	1313	685	9.55097	685	685	7.27416	1313	1136	8.7741	1136	1136	6.68248	1313	834.667	9.38692	150	10.7926	150	150	8.2198	1313	715	8.68447	714
XM_019601532.1	425	10.2279	425	425	7.87972	1298	785	9.15591	785	785	7.05386	1298	1302	9.56635	1302	1302	7.37007	1298	837.333	9.65005	710	10.2245	710	710	7.87712	1298	622	8.67256	622	622	6.68148	1298	1129	8.72003	1129	1129	6.71805	1298	820.333	9.2057	164	11.7999	164	164	9.09083	1298	724	8.79378	724
XM_019579107.1	641	15.426	66	641	8.38372	1840	1279	14.9177	267	1279	8.10745	1840	2084	15.312	355	2084	8.32176	1840	1334.67	15.2186	974	14.0263	160	974	7.62298	1840	958	13.3574	175	958	7.25947	1840	1667	12.8754	306	1667	6.99749	1840	1199.67	13.4197	153	11.0084	21	153	5.98285	1840	1063	12.9113	220
XM_019564104.1	1623	39.0585	157	1623	13.8554	2819	2946	34.3609	451	2946	12.189	2819	4154	30.5212	568	4154	10.827	2819	2907.67	34.6469	2715	39.0979	262	2715	13.8694	2819	2236	31.1766	368	2236	11.0595	2819	3167	24.4609	465	3167	8.67715	2819	2706	31.5785	694	49.9337	73	694	17.7133	2819	3542	43.0215	513
XM_019585361.1	5326	128.173	5324	5326	45.4838	2818	8176	95.3614	8176	8176	33.8401	2818	12045	88.4998	12045	12045	31.4052	2818	8515.67	104.012	8121	116.948	8120	8121	41.5004	2818	6719	93.6832	6717	6719	33.2446	2818	12067	93.2016	12065	12067	33.0737	2818	8969	101.278	1865	134.188	1865	1865	47.6181	2818	8262	100.351	8262
XM_019564188.1	795	19.1321	55	795	6.37738	3000	1376	16.0491	101	1376	5.34969	3000	2709	19.9042	252	2709	6.63473	3000	1626.67	18.3618	1133	16.316	95	1133	5.43867	3000	1271	17.7216	129	1271	5.9072	3000	2494	19.2629	262	2494	6.42095	3000	1632.67	17.7668	244	17.556	15	244	5.85198	3000	1260	15.3041	101
XM_019608260.1	12596	303.13	1078	12596	102.202	2966	26770	312.234	3077	26770	105.271	2966	43425	319.062	4413	43425	107.573	2966	27597	311.475	25407	365.879	1938	25407	123.358	2966	23068	321.638	2566	23068	108.442	2966	46928	362.457	4670	46928	122.204	2966	31801	349.991	5627	404.866	464	5627	136.502	2966	33939	412.227	3646
XM_019566193.1	2418	58.1906	0	2418	30.7237	1894	4612	53.7924	2	4612	28.4015	1894	5730	42.1008	4	5730	22.2285	1894	4253.33	51.3613	4948	71.2547	0	4948	37.6213	1894	2535	35.3456	2	2535	18.6619	1894	4813	37.1741	4	4813	19.6273	1894	4098.67	47.9248	933	67.1299	0	933	35.4435	1894	3386	41.1267	8
XM_019589346.1	1352	32.5367	194	1352	16.7975	1937	10860	126.666	747	10860	65.3931	1937	17655	129.719	1262	17655	66.9689	1937	9955.67	96.3073	1989	28.643	253	1989	14.7873	1937	6973	97.2247	484	6973	50.1935	1937	16863	130.244	1209	16863	67.2403	1937	8608.33	85.3707	487	35.04	62	487	18.0898	1937	9703	117.854	670
[truncated: 33 more columns]

## Sheet: Andean lupin (B)
	Table S4. Transcriptomics data related to pexophagy (autophagic degradation of peroxisome) in white lupin (A) and Andean lupin (B) embryonic axes. The axes were isolated from imbibed seeds and cultured in vitro for 96 h on a medium with (+S) and without (-S) 60 mM sucrose. Culture media were also enriched with 35 mM asparagine (+Asn). Data were obtained from three independent in vitro cultures an…
	+S																				+S+Asn																				-S
	Sequencing 1						Sequencing 2						Sequencing 3						Means	Normalized means	Sequencing 1						Sequencing 2						Sequencing 3						Means	Normalized means	Sequencing 1						Sequencing 2
Feature ID	group 1 - 180518_SNK268_B_L005_APBZ-1-1_R1 trimmed-1 (GE)-1 - Expression values	group 1 - 180518_SNK268_B_L005_APBZ-1-1_R1 trimmed-1 (GE)-1 - Normalized expression values	group 1 - 180518_SNK268_B_L005_APBZ-1-1_R1 trimmed-1 (GE)-1 - Unique gene reads	group 1 - 180518_SNK268_B_L005_APBZ-1-1_R1 trimmed-1 (GE)-1 - Total gene reads	group 1 - 180518_SNK268_B_L005_APBZ-1-1_R1 trimmed-1 (GE)-1 - RPKM	group 1 - 180518_SNK268_B_L005_APBZ-1-1_R1 trimmed-1 (GE)-1 - Chromosome region end	group 1 - 190517_SNK268_A_L001_APBZ-2-1 (GE) - Expression values	group 1 - 190517_SNK268_A_L001_APBZ-2-1 (GE) - Normalized expression values	group 1 - 190517_SNK268_A_L001_APBZ-2-1 (GE) - Unique gene reads	group 1 - 190517_SNK268_A_L001_APBZ-2-1 (GE) - Total gene reads	group 1 - 190517_SNK268_A_L001_APBZ-2-1 (GE) - RPKM	group 1 - 190517_SNK268_A_L001_APBZ-2-1 (GE) - Chromosome region end	group 1 - 210217_A00902_B_APBZ-3-1 (GE) - Expression values	group 1 - 210217_A00902_B_APBZ-3-1 (GE) - Normalized expression values	group 1 - 210217_A00902_B_APBZ-3-1 (GE) - Unique gene reads	group 1 - 210217_A00902_B_APBZ-3-1 (GE) - Total gene reads	group 1 - 210217_A00902_B_APBZ-3-1 (GE) - RPKM	group 1 - 210217_A00902_B_APBZ-3-1 (GE) - Chromosome region end	group 1 - Means	group 1 - Normalized means	group 2 - 180518_SNK268_B_L005_APBZ-1-2_R1 trimmed (GE)-1 - Expression values	group 2 - 180518_SNK268_B_L005_APBZ-1-2_R1 trimmed (GE)-1 - Normalized expression values	group 2 - 180518_SNK268_B_L005_APBZ-1-2_R1 trimmed (GE)-1 - Unique gene reads	group 2 - 180518_SNK268_B_L005_APBZ-1-2_R1 trimmed (GE)-1 - Total gene reads	group 2 - 180518_SNK268_B_L005_APBZ-1-2_R1 trimmed (GE)-1 - RPKM	group 2 - 180518_SNK268_B_L005_APBZ-1-2_R1 trimmed (GE)-1 - Chromosome region end	group 2 - 190517_SNK268_A_L001_APBZ-2-2 (GE) - Expression values	group 2 - 190517_SNK268_A_L001_APBZ-2-2 (GE) - Normalized expression values	group 2 - 190517_SNK268_A_L001_APBZ-2-2 (GE) - Unique gene reads	group 2 - 190517_SNK268_A_L001_APBZ-2-2 (GE) - Total gene reads	group 2 - 190517_SNK268_A_L001_APBZ-2-2 (GE) - RPKM	group 2 - 190517_SNK268_A_L001_APBZ-2-2 (GE) - Chromosome region end	group 2 - 210217_A00902_B_L002_APBZ-3-2 (GE)-1 - Expression values	group 2 - 210217_A00902_B_L002_APBZ-3-2 (GE)-1 - Normalized expression values	group 2 - 210217_A00902_B_L002_APBZ-3-2 (GE)-1 - Unique gene reads	group 2 - 210217_A00902_B_L002_APBZ-3-2 (GE)-1 - Total gene reads	group 2 - 210217_A00902_B_L002_APBZ-3-2 (GE)-1 - RPKM	group 2 - 210217_A00902_B_L002_APBZ-3-2 (GE)-1 - Chromosome region end	group 2 - Means	group 2 - Normalized means	group 3 - 180518_SNK268_B_L005_APBZ-1-3_R1 trimmed (GE)-1 - Expression values	group 3 - 180518_SNK268_B_L005_APBZ-1-3_R1 trimmed (GE)-1 - Normalized expression values	group 3 - 180518_SNK268_B_L005_APBZ-1-3_R1 trimmed (GE)-1 - Unique gene reads	group 3 - 180518_SNK268_B_L005_APBZ-1-3_R1 trimmed (GE)-1 - Total gene reads	group 3 - 180518_SNK268_B_L005_APBZ-1-3_R1 trimmed (GE)-1 - RPKM	group 3 - 180518_SNK268_B_L005_APBZ-1-3_R1 trimmed (GE)-1 - Chromosome region end	group 3 - 190517_SNK268_A_L001_APBZ-2-3 (GE) - Expression values	group 3 - 190517_SNK268_A_L001_APBZ-2-3 (GE) - Normalized expression values	group 3 - 190517_SNK268_A_L001_APBZ-2-3 (GE) - Unique gene reads
XM_019559989.1	3042	86.4623	194	3042	63.3888	1364	5257	65.8431	558	5257	48.272	1364	8412	69.4837	905	8412	50.9411	1364	5570.33	73.9297	4062	68.9339	270	4062	50.538	1364	5814	70.2146	638	5814	51.477	1364	7421	58.4202	727	7421	42.8301	1364	5765.67	65.8562	4354	143.353	253	4354	105.098	1364	12180	146.441	825
XM_019590566.1	122	3.46759	2	122	2.75424	1259	148	1.85368	4	148	1.47234	1259	146	1.20597	7	146	0.95788	1259	138.667	2.17575	40	0.678817	1	40	0.539171	1259	148	1.78737	4	148	1.41967	1259	266	2.09403	11	266	1.66325	1259	151.333	1.52007	0	0	0	0	0	1259	462	5.55466	6
XM_019598159.1	2090	59.4038	55	2090	13.0472	4553	3152	39.4783	150	3152	8.67083	4553	4900	40.4744	215	4900	8.8896	4553	3380.67	46.4521	3021	51.2676	82	3021	11.2602	4553	3016	36.4237	174	3016	7.99993	4553	4742	37.3304	167	4742	8.19907	4553	3593	41.6739	1778	58.5398	60	1778	12.8574	4553	4355	52.3605	211
XM_019586245.1	1015	28.8492	2	1015	7.69107	3751	2000	25.0497	24	2000	6.67813	3751	3115	25.7301	33	3115	6.85954	3751	2043.33	26.543	1583	26.8642	2	1583	7.16187	3751	2246	27.1245	29	2246	7.23128	3751	3476	27.3641	16	3476	7.29514	3751	2435	27.1176	1281	42.1763	2	1281	11.244	3751	3559	42.7901	53
XM_019593396.1	462	13.1314	462	462	15.0762	871	945	11.836	945	945	13.5889	871	1226	10.1268	1226	1226	11.6267	871	877.667	11.6981	574	9.74102	574	574	11.1837	871	776	9.37161	776	776	10.7596	871	783	6.164	783	783	7.07692	871	711	8.42554	499	16.4293	499	499	18.8626	871	1550	18.6358	1550
XM_019570378.1	407	11.5681	9	407	19.5738	591	341	4.27097	26	341	7.22668	591	710	5.86465	79	710	9.92327	591	486	7.23457	471	7.99307	24	471	13.5247	591	397	4.79449	52	397	8.11251	591	448	3.52678	43	448	5.96748	591	438.667	5.43812	769	25.319	25	769	42.8409	591	832	10.0032	64
XM_019562578.1	1535	43.6291	1336	1535	57.7104	756	3175	39.7664	3048	3175	52.601	756	4752	39.2519	4617	4752	51.9205	756	3154	40.8824	2326	39.4732	2072	2326	52.2132	756	4075	49.213	3963	4075	65.0966	756	6324	49.7843	6152	6324	65.8523	756	4241.67	46.1568	1691	55.6754	1503	1691	73.6447	756	4681	56.28	4546
XM_019584286.1	264	7.50363	231	264	10.524	713	688	8.61709	651	688	12.0857	713	1366	11.2833	1303	1366	15.825	713	772.667	9.13466	455	7.72154	398	455	10.8297	713	921	11.1227	867	921	15.5999	713	1548	12.1863	1475	1548	17.0916	713	974.667	10.3435	363	11.9516	317	363	16.7624	713	865	10.4	827
XM_019592193.1	30	0.852686	0	30	1.4355	594	351	4.39622	19	351	7.40104	594	591	4.8817	39	591	8.21835	594	324	3.37687	228	3.86926	0	228	6.5139	594	347	4.19065	19	347	7.05497	594	434	3.41657	32	434	5.7518	594	336.333	3.82549	140	4.60943	0	140	7.75999	594	513	6.16784	25
XM_019591170.1	3209	91.209	3209	3209	136.133	670	7377	92.3957	7377	7377	137.904	670	9601	79.305	9599	9601	118.366	670	6729	87.6365	4464	75.756	4464	4464	113.069	670	7859	94.9117	7859	7859	141.659	670	8845	69.6303	8844	8845	103.926	670	7056	80.0993	4402	144.934	4401	4402	216.319	670	14508	174.431	14508
XM_019573451.1	2323	66.0263	2323	2323	113.447	582	5110	64.0019	5110	5110	109.969	582	8467	69.938	8467	8467	120.168	582	5300	66.6554	3675	62.3663	3675	3675	107.159	582	4787	57.8117	4787	4787	99.3328	582	7784	61.2779	7784	7784	105.288	582	5415.33	60.4853	2493	82.0809	2493	2493	141.032	582	7392	88.8746	7392
XR_002105261.1	7845	222.977	384	7845	124.014	1798	11699	146.528	845	11699	81.495	1798	27484	227.02	1533	27484	126.262	1798	15676	198.842	8313	141.075	462	8313	78.4622	1798	7811	94.332	473	7811	52.4649	1798	36237	285.268	1987	36237	158.658	1798	17453.7	173.558	10528	346.629	517	10528	192.786	1798	31663	380.687	1617
XM_019560433.1	444	12.6197	441	444	12.4948	1010	729	9.13061	729	729	9.0402	1010	1508	12.4562	1506	1508	12.3329	1010	893.667	11.4022	486	8.24763	475	486	8.16597	1010	583	7.04078	583	583	6.97107	1010	1562	12.2965	1558	1562	12.1748	1010	877	9.19497	388	12.7747	378	388	12.6482	1010	1277	15.3535	1277
XM_019582491.1	289	8.21421	287	289	7.58468	1083	596	7.4648	596	596	6.89271	1083	915	7.55797	915	915	6.97873	1083	600	7.74566	520	8.82462	509	520	8.14831	1083	451	5.44664	451	451	5.02922	1083	1228	9.66716	1228	1228	8.92628	1083	733	7.97948	287	9.44934	280	287	8.72515	1083	688	8.27188	688
XM_019590461.1	4483	127.42	211	4483	40.2972	3162	7889	98.8084	490	7889	31.2487	3162	12758	105.382	769	12758	33.3276	3162	8376.67	110.537	7604	129.043	456	7604	40.8106	3162	8279	99.9839	593	8279	31.6205	3162	14887	117.195	1046	14887	37.0635	3162	10256.7	115.407	4449	146.481	201	4449	46.3255	3162	12056	144.95	859
XM_019608568.1	1477	41.9806	0	1477	22.3182	1881	2607	32.6522	30	2607	17.359	1881	4721	38.9958	48	4721	20.7314	1881	2935	37.8762	2471	41.9339	0	2471	22.2934	1881	2710	32.7282	32	2710	17.3993	1881	4449	35.0238	20	4449	18.6198	1881	3210	36.562	1292	42.5385	0	1292	22.6148	1881	2399	28.8434	8
XM_019566789.1	368	10.4596	368	368	7.77666	1345	901	11.2849	901	901	8.39024	1345	1537	12.6957	1537	1537	9.4392	1345	935.333	11.4801	600	10.1823	600	600	7.57045	1345	968	11.6904	968	968	8.69171	1345	1573	12.3831	1573	1573	9.20677	1345	1047	11.4186	394	12.9723	394	394	9.64481	1345	864	10.3879	864
XM_019575129.1	417	11.8523	417	417	9.02691	1313	847	10.6085	847	847	8.07962	1313	1461	12.068	1461	1461	9.19114	1313	908.333	11.5096	725	12.3036	725	725	9.37057	1313	1086	13.1154	1086	1086	9.98889	1313	1563	12.3044	1563	1563	9.3712	1313	1124.67	12.5745	494	16.2647	494	494	12.3874	1313	942	11.3257	942
XM_019601532.1	809	22.9941	809	809	17.715	1298	1462	18.3113	1462	1462	14.1073	1298	2537	20.9558	2537	2537	16.1447	1298	1602.67	20.7537	1252	21.247	1252	1252	16.369	1298	1507	18.1998	1507	1507	14.0214	1298	2105	16.5712	2105	2105	12.7667	1298	1621.33	18.6726	941	30.982	941	941	23.869	1298	1810	21.7618	1810
XM_019566892.1	408	11.5965	51	408	7.44799	1557	922	11.5479	154	922	7.41676	1557	1732	14.3064	207	1732	9.18847	1557	1020.67	12.4836	824	13.9836	79	824	8.98114	1557	873	10.5431	126	873	6.77139	1557	1202	9.46248	194	1202	6.07738	1557	966.333	11.3297	313	10.3054	24	313	6.61874	1557	645	7.75489	108
XM_019564188.1	663	18.8444	34	663	6.28145	3000	1329	16.6455	129	1329	5.5485	3000	2430	20.072	250	2430	6.69066	3000	1474	18.5206	1128	19.1426	56	1128	6.38088	3000	1519	18.3447	146	1519	6.11489	3000	2604	20.4994	280	2604	6.83314	3000	1750.33	19.3289	727	23.9361	44	727	7.97871	3000	1547	18.5997	116
XM_019608260.1	6055	172.1	619	6055	58.0244	2966	13814	173.018	1759	13814	58.3338	2966	22278	184.018	2616	22278	62.0424	2966	14049	176.379	10206	173.2	1032	10206	58.3952	2966	19685	237.732	2496	19685	80.1524	2966	29037	228.587	3521	29037	77.0693	2966	19642.7	213.173	6022	198.272	610	6022	66.8481	2966	14961	179.877	1851
XM_019608702.1	233	6.62253	25	233	1.90467	3477	707	8.85506	79	707	2.54675	3477	657	5.42687	68	657	1.56079	3477	532.333	6.96815	265	4.49716	26	265	1.2934	3477	358	4.3235	31	358	1.24346	3477	552	4.3455	63	552	1.24978	3477	391.667	4.38872	113	3.72047	11	113	1.07002	3477	761	9.14957	74
XM_019565845.1	1356	38.5414	0	1356	20.5884	1872	1923	24.0853	4	1923	12.8661	1872	2385	19.7003	4	2385	10.5236	1872	1888	27.4423	2029	34.433	0	2029	18.3937	1872	1547	18.6828	0	1547	9.98014	1872	3504	27.5845	0	3504	14.7353	1872	2360	26.9001	1213	39.9375	0	1213	21.3341	1872	2396	28.8073	0
XM_019589346.1	4931	140.153	672	4931	72.3558	1937	11178	140.003	2118	11178	72.2781	1937	17377	143.535	3015	17377	74.1018	1937	11162	141.23	8245	139.921	1100	8245	72.236	1937	11989	144.789	2251	11989	74.749	1937	17623	138.733	3452	17623	71.6227	1937	12619	141.148	4425	145.691	535	4425	75.2148	1937	12884	154.905	2077
[truncated: 33 more columns]
